# Supplementary material for: Discovery and Validation of Traditional Chinese and Western Medicine Combination Antirheumatoid Arthritis Drugs Based on Machine Learning (Random Forest Model)
Source: Biomed Res Int. 2023 Feb 15;2023:6086388. doi: 10.1155/2023/6086388 (PMC9950790; doi:10.1155/2023/6086388)
Supplement: Supplementary 1 — Pretreated FDA-certified combination drug dataset. [file 6086388.f1.txt]

Table S1 Pretreated FDA-certified combination drug dataset
Comb	DrugA	DrugB
C001	DB00484	DB00373
C002	DB00443	DB02300
C003	DB00443	DB00257
C004	DB01034	DB01235
C005	DB01222	DB00983
C006	DB00625	DB14126
C007	DB00625	DB00879
C008	DB12153	DB00393
C009	DB00188	DB00773
C010	DB01254	DB00526
C011	DB13919	DB00178
C012	DB01248	DB00762
C013	DB01601	DB01232
C014	DB12054	DB00584
C015	DB00415	DB00080
C016	DB00798	DB00512
C017	DB01229	DB05109
C018	DB00681	DB00362
C019	DB13132	DB11672
C020	DB00515	DB00441
C021	DB00358	DB09241
C022	DB00760	DB00684
C023	DB00818	DB01236
C024	DB00415	DB01598
C025	DB01119	DB00325
C026	DB06448	DB01229
C027	DB00997	DB00305
C028	DB00575	DB00633
C029	DB09214	DB00193
C030	DB00482	DB07715
C031	DB00619	DB02546
C032	DB00958	DB00412
C033	DB01248	DB00432
C034	DB00654	DB00373
C035	DB01015	DB00440
C036	DB01194	DB00373
C037	DB00205	DB01299
C038	DB13132	DB16249
C039	DB00762	DB00526
C040	DB00515	DB05109
C041	DB00979	DB00388
C042	DB01169	DB05134
C043	DB00515	DB01030
C044	DB01101	DB01248
C045	DB00316	DB00586
C046	DB00515	DB00531
C047	DB00514	DB01069
C048	DB00586	DB00929
C049	DB00405	DB00852
C050	DB00514	DB00874
C051	DB00987	DB05134
C052	DB00207	DB01598
C053	DB00681	DB06440
C054	DB00321	DB00850
C055	DB03852	DB00495
C056	DB01223	DB00277
C057	DB00537	DB01044
C058	DB00567	DB01172
C059	DB00773	DB05134
C060	DB00808	DB00790
C061	DB00317	DB00762
C062	DB00950	DB01032
C063	DB00631	DB00987
C064	DB00530	DB00642
C065	DB00996	DB00295
C066	DB13132	DB09241
C067	DB00613	DB09274
C068	DB01132	DB04876
C069	DB00381	DB00790
C070	DB00975	DB00860
C071	DB00260	DB03823
C072	DB01234	DB00480
C073	DB00584	DB01054
C074	DB00515	DB12410
C075	DB06697	DB06708
C076	DB00381	DB00966
C077	DB00455	DB00471
C078	DB00584	DB00528
C079	DB00188	DB02546
C080	DB00188	DB06448
C081	DB01060	DB00815
C082	DB08799	DB01620
C083	DB01076	DB01131
C084	DB00572	DB01081
C085	DB00572	DB00733
C086	DB00997	DB05109
C087	DB00439	DB01241
C088	DB00544	DB11998
C089	DB00503	DB01232
C090	DB09096	DB00199
C091	DB00091	DB01098
C092	DB09096	DB01190
C093	DB01254	DB06595
C094	DB00709	DB14126
C095	DB01645	DB00398
C096	DB11629	DB00627
C097	DB01101	DB00526
C098	DB01156	DB00704
C099	DB00958	DB00398
C100	DB00531	DB01229
C101	DB00207	DB00438
C102	DB00905	DB00373
C103	DB00996	DB00906
C104	DB09026	DB01029
C105	DB12617	DB00688
C106	DB00555	DB00273
C107	DB12497	DB00178
C108	DB00564	DB00273
C109	DB01075	DB00277
C110	DB00776	DB00273
C111	DB01202	DB00273
C112	DB00564	DB00555
C113	DB00612	DB00966
C114	DB01194	DB00654
C115	DB01169	DB00755
C116	DB01591	DB00706
C117	DB00542	DB00999
C118	DB09026	DB00999
C119	DB00381	DB01076
C120	DB00492	DB00999
C121	DB00874	DB00852
C122	DB00381	DB00542
C123	DB00381	DB00275
C124	DB00594	DB00999
C125	DB00436	DB01203
C126	DB00515	DB00762
C127	DB00518	DB00860
C128	DB01590	DB00864
C129	DB01229	DB00539
C130	DB00999	DB00722
C131	DB00999	DB00678
C132	DB00999	DB00968
C133	DB00999	DB00264
C134	DB00381	DB00177
C135	DB00999	DB01029
C136	DB00999	DB00275
C137	DB00999	DB00571
C138	DB00999	DB00881
C139	DB00479	DB00560
C140	DB01137	DB00560
C141	DB00803	DB00560
C142	DB01598	DB00560
C143	DB00537	DB00440
C144	DB00818	DB00899
C145	DB00415	DB00798
C146	DB11750	DB01026
C147	DB01101	DB00762
C148	DB01175	DB01255
C149	DB00731	DB00177
C150	DB00951	DB01201
C151	DB00412	DB06335
C152	DB01259	DB01229
C153	DB00515	DB00997
C154	DB01072	DB06817
C155	DB00851	DB00853
C156	DB00211	DB00104
C157	DB00368	DB02638
C158	DB01101	DB01229
C159	DB11828	DB00361
C160	DB06724	DB00169
C161	DB06292	DB00331
C162	DB06151	DB00746
C163	DB00947	DB04960
C164	DB00497	DB00230
C165	DB01101	DB01268
C166	DB01248	DB05294
C167	DB12254	DB00642
C168	DB08826	DB00746
C169	DB01076	DB00973
C170	DB01248	DB06629
C171	DB00681	DB01609
C172	DB00760	DB00218
C173	DB01274	DB01409
C174	DB00544	DB00650
C175	DB00594	DB00310
C176	DB00564	DB00996
C177	DB00501	DB00950
C178	DB00586	DB00759
C179	DB00788	DB00759
C180	DB01039	DB00641
C181	DB01202	DB00776
C182	DB01259	DB01030
C183	DB01088	DB00203
C184	DB00996	DB00776
C185	DB09026	DB00178
C186	DB01075	DB01050
C187	DB01060	DB00338
C188	DB00515	DB00987
C189	DB00563	DB01129
C190	DB01117	DB01131
C191	DB00829	DB00813
C192	DB06203	DB01016
C193	DB00319	DB01606
C194	DB00860	DB00634
C195	DB00555	DB00776
C196	DB01190	DB00755
C197	DB01241	DB01098
C198	DB00997	DB01229
C199	DB01114	DB00852
C200	DB01114	DB00956
C201	DB01597	DB01598
C202	DB00950	DB00852
C203	DB00967	DB00852
C204	DB01394	DB01032
C205	DB00188	DB00480
C206	DB00210	DB09096
C207	DB00318	DB01069
C208	DB00515	DB00853
C209	DB00563	DB00213
C210	DB01259	DB01006
C211	DB00852	DB00427
C212	DB01197	DB00999
C213	DB13919	DB00999
C214	DB00788	DB00669
C215	DB00999	DB00966
C216	DB00999	DB00421
C217	DB00999	DB00177
C218	DB00999	DB00384
C219	DB00584	DB01023
C220	DB00519	DB00661
C221	DB00876	DB00999
C222	DB00584	DB00999
C223	DB00438	DB00487
C224	DB00479	DB06160
C225	DB00355	DB06160
C226	DB00335	DB00310
C227	DB00201	DB00696
C228	DB00956	DB01050
C229	DB00363	DB00472
C230	DB00316	DB01009
C231	DB00479	DB01212
C232	DB00479	DB00438
C233	DB00321	DB00475
C234	DB00332	DB01001
C235	DB09488	DB00852
C236	DB00455	DB00852
C237	DB01050	DB00497
C238	DB01183	DB00652
C239	DB00869	DB00373
C240	DB00537	DB01234
C241	DB00537	DB00741
C242	DB00612	DB00999
C243	DB00741	DB00595
C244	DB01234	DB00684
C245	DB00514	DB00809
C246	DB01050	DB00852
C247	DB12518	DB00273
C248	DB00902	DB00433
C249	DB00381	DB01082
C250	DB01413	DB06160
C251	DB06160	DB01598
C252	DB01048	DB00709
C253	DB00709	DB00495
C254	DB01601	DB00503
C255	DB01076	DB06281
C256	DB00879	DB14126
C257	DB00281	DB09085
C258	DB00281	DB00750
C259	DB00227	DB00627
C260	DB00316	DB00241
C261	DB06707	DB00961
C262	DB00448	DB00788
C263	DB00331	DB01132
C264	DB00331	DB00912
C265	DB00627	DB00641
C266	DB00335	DB08868
C267	DB00482	DB06641
C268	DB00343	DB08868
C269	DB00997	DB00331
C270	DB00316	DB00318
C271	DB00207	DB01033
C272	DB00316	DB00652
C273	DB01033	DB00615
C274	DB00316	DB00497
C275	DB00316	DB01551
C276	DB01211	DB01033
C277	DB01016	DB00331
C278	DB01067	DB00331
C279	DB00316	DB00193
C280	DB00222	DB00412
C281	DB00222	DB01132
C282	DB00331	DB01261
C283	DB00331	DB00412
C284	DB00190	DB01235
C285	DB00586	DB00908
C286	DB00908	DB00682
C287	DB00341	DB00852
C288	DB00681	DB09031
C289	DB00921	DB01183
C290	DB00515	DB01035
C291	DB00787	DB00788
C292	DB00681	DB01263
C293	DB00787	DB01009
C294	DB00537	DB01032
C295	DB00619	DB00853
C296	DB00927	DB01032
C297	DB01262	DB01229
C298	DB01155	DB01032
C299	DB00515	DB00526
C300	DB00563	DB00338
C301	DB00788	DB00852
C302	DB00188	DB00515
C303	DB00695	DB00978
C304	DB00646	DB00620
C305	DB01101	DB00619
C306	DB00978	DB00863
C307	DB00338	DB01390
C308	DB06203	DB01132
C309	DB00388	DB01069
C310	DB00798	DB00860
C311	DB00472	DB00334
C312	DB01395	DB00783
C313	DB00973	DB00641
C314	DB00783	DB00957
C315	DB00199	DB00263
C316	DB00783	DB00367
C317	DB00668	DB00281
C318	DB00668	DB00750
C319	DB00297	DB00668
C320	DB01023	DB01029
C321	DB08907	DB00331
C322	DB01242	DB00472
C323	DB01248	DB00317
C324	DB00472	DB01224
C325	DB00681	DB00196
C326	DB00188	DB01262
C327	DB13868	DB00709
C328	DB00203	DB00820
C329	DB00484	DB00654
C330	DB00544	DB00398
C331	DB06626	DB00441
C332	DB06634	DB01248
C333	DB00188	DB00997
C334	DB08903	DB00339
C335	DB01076	DB09279
C336	DB08916	DB01229
C337	DB01101	DB01259
C338	DB01101	DB00531
C339	DB00683	DB00818
C340	DB01101	DB04845
C341	DB01590	DB01006
C342	DB00222	DB00331
C343	DB09274	DB00358
C344	DB01222	DB00448
C345	DB13868	DB00442
C346	DB00441	DB00526
C347	DB00327	DB01192
C348	DB01234	DB08910
C349	DB01217	DB00317
C350	DB00602	DB00643
C351	DB01023	DB00264
C352	DB01248	DB00997
C353	DB00281	DB00727
C354	DB00169	DB01104
C355	DB01204	DB00635
C356	DB01075	DB06287
C357	DB05719	DB01229
C358	DB00704	DB01104
C359	DB00758	DB06209
C360	DB01248	DB00530
C361	DB04849	DB01206
C362	DB00958	DB00441
C363	DB01248	DB00635
C364	DB00947	DB00317
C365	DB00355	DB00512
C366	DB01076	DB00758
C367	DB00841	DB00368
C368	DB00544	DB00104
C369	DB00798	DB01137
C370	DB00158	DB00331
C371	DB00973	DB01095
C372	DB01212	DB01137
C373	DB09074	DB01229
C374	DB11828	DB01229
C375	DB00878	DB00281
C376	DB00683	DB06629
C377	DB00983	DB00938
C378	DB06590	DB01211
C379	DB00317	DB00641
C380	DB00813	DB00683
C381	DB00853	DB02546
C382	DB00476	DB01175
C383	DB00882	DB00331
C384	DB01212	DB00303
C385	DB00813	DB00961
C386	DB01233	DB00388
C387	DB00695	DB00421
C388	DB00695	DB00742
C389	DB00215	DB00472
C390	DB01008	DB01042
C391	DB00563	DB00864
C392	DB00758	DB01590
C393	DB09031	DB01421
C394	DB00441	DB01229
C395	DB00175	DB00641
C396	DB00307	DB00553
C397	DB00388	DB00852
C398	DB00635	DB01041
C399	DB00213	DB11656
C400	DB00515	DB00642
C401	DB01137	DB00635
C402	DB01197	DB01029
C403	DB00993	DB00860
C404	DB00928	DB00480
C405	DB00327	DB00497
C406	DB00749	DB00571
C407	DB00515	DB00530
C408	DB00515	DB00544
C409	DB09265	DB00331
C410	DB00983	DB01409
C411	DB00175	DB00177
C412	DB00188	DB01177
C413	DB00758	DB00966
C414	DB09026	DB01197
C415	DB01222	DB00871
C416	DB00297	DB00327
C417	DB00438	DB00916
C418	DB01136	DB00584
C419	DB00722	DB00678
C420	DB01101	DB00398
C421	DB00958	DB00642
C422	DB00872	DB00695
C423	DB01076	DB00641
C424	DB00316	DB00295
C425	DB00564	DB00238
C426	DB00958	DB01248
C427	DB01394	DB01026
C428	DB00537	DB00684
C429	DB00238	DB00495
C430	DB01050	DB12228
C431	DB01394	DB00503
C432	DB13919	DB01115
C433	DB01264	DB00503
C434	DB00515	DB00361
C435	DB01212	DB00713
C436	DB06772	DB00635
C437	DB00482	DB06777
C438	DB00659	DB01175
C439	DB01212	DB01211
C440	DB09274	DB12975
C441	DB01043	DB00989
C442	DB00958	DB00773
C443	DB00678	DB00571
C444	DB00640	DB09220
C445	DB00331	DB00421
C446	DB00316	DB12228
C447	DB06616	DB00448
C448	DB09230	DB00275
C449	DB01221	DB00295
C450	DB00312	DB00599
C451	DB06203	DB04878
C452	DB06710	DB00203
C453	DB00476	DB00996
C454	DB00928	DB00398
C455	DB00834	DB00929
C456	DB00531	DB00860
C457	DB00997	DB00398
C458	DB01212	DB00916
C459	DB01132	DB06335
C460	DB06288	DB01171
C461	DB01576	DB00422
C462	DB01217	DB00947
C463	DB13919	DB00584
C464	DB00381	DB00999
C465	DB00503	DB00932
C466	DB01068	DB01104
C467	DB00335	DB00678
C468	DB01101	DB06486
C469	DB01120	DB00331
C470	DB01156	DB01175
C471	DB00518	DB00602
C472	DB01263	DB01036
C473	DB00381	DB00678
C474	DB00317	DB01268
C475	DB06151	DB00860
C476	DB00973	DB00627
C477	DB00987	DB00694
C478	DB00334	DB01104
C479	DB00811	DB08934
C480	DB04972	DB00997
C481	DB00471	DB00860
C482	DB01421	DB05630
C483	DB00586	DB00338
C484	DB04849	DB09074
C485	DB01156	DB01175
C486	DB00758	DB01229
C487	DB00921	DB00704
C488	DB00709	DB00220
C489	DB01254	DB01248
C490	DB01590	DB00990
C491	DB01029	DB00178
C492	DB01076	DB01098
C493	DB01212	DB00601
C494	DB09026	DB00678
C495	DB01012	DB00910
C496	DB01609	DB00746
C497	DB01167	DB00208
C498	DB09274	DB00207
C499	DB14509	DB00740
C500	DB01183	DB00497
C501	DB09274	DB00608
C502	DB00441	DB09256
C503	DB00678	DB04861
C504	DB00773	DB04960
C505	DB00398	DB01268
C506	DB00688	DB00864
C507	DB00990	DB00675
C508	DB00555	DB00715
C509	DB00446	DB14539
C510	DB00446	DB00860
C511	DB00880	DB00206
C512	DB00310	DB00206
C513	DB01248	DB00361
C514	DB00531	DB00642
C515	DB01248	DB00445
C516	DB00381	DB01029
C517	DB01248	DB00441
C518	DB00330	DB00951
C519	DB00182	DB01576
C520	DB08822	DB00310
C521	DB09123	DB13956
C522	DB00927	DB01050
C523	DB00787	DB00741
C524	DB06723	DB09281
C525	DB00415	DB01032
C526	DB01324	DB00206
C527	DB09364	DB00277
C528	DB01325	DB00206
C529	DB00206	DB01021
C530	DB00359	DB01581
C531	DB04815	DB00646
C532	DB01764	DB01369
C533	DB01089	DB00999
C534	DB01089	DB00232
C535	DB13954	DB00603
C536	DB13954	DB13943
C537	DB13956	DB13944
C538	DB00823	DB01357
C539	DB00999	DB00960
C540	DB00999	DB00206
C541	DB14539	DB03904
C542	DB00774	DB00206
C543	DB00742	DB01638
C544	DB09516	DB00755
C545	DB01357	DB09371
C546	DB00232	DB00206
