# Supplementary material for: Discovery and Validation of Traditional Chinese and Western Medicine Combination Antirheumatoid Arthritis Drugs Based on Machine Learning (Random Forest Model)
Source: Biomed Res Int. 2023 Feb 15;2023:6086388. doi: 10.1155/2023/6086388 (PMC9950790; doi:10.1155/2023/6086388)
Supplement: Supplementary 2 — Positive and negative sample training dataset for all drug combinations. [file 6086388.f2.txt]

Table S2 Positive and negative sample training dataset for all drug combinations
SFP	SADME	SSeqmin	SSeqmax	SSeqmed	SSeqmean	SGOmin	SGOmax	SGOmed	SGOmean	SPathway	SPPImin	SPPImax	SPPImed	SPPImean	Snp	Comb
0.705882353	5.686454129	0.008051542	0.020252175	0.013890473	0.01454912	0.153	0.635	0.5215	0.463944444	0	0.880797078	0.952574127	0.952574127	0.07830314	-0.273198322	N
0.745283019	5.924558441	0.004361434	0.020210374	0.011286225	0.011487462	0.279	0.566	0.421	0.422	0	0.952574127	0.952574127	0.952574127	0.049787068	-0.44582518	N
0.819354839	6.009073479	0.008051542	0.020252175	0.013890473	0.01454912	0.153	0.635	0.5215	0.463944444	0	0.880797078	0.952574127	0.952574127	0.07830314	-0.273198322	N
0.832258065	2.85447799	0.007721575	0.02930622	0.013814024	0.01601941	0.395	0.58	0.513	0.506166667	0	0.952574127	0.952574127	0.952574127	0.049787068	-0.327048564	N
0.736625514	2.080495446	0.067702126	0.074499293	0.07369551	0.071965643	0.702	0.759	0.751	0.737333333	0.023622047	0.952574127	0.952574127	0.952574127	0.049787068	-0.661991359	N
0.678571429	1.984466341	0.007921207	0.01686271	0.014023481	0.012461381	0.234	0.523	0.395	0.413533333	0.009424084	0.880797078	0.98201379	0.952574127	0.049195997	-0.288986473	N
0.673076923	2.952430102	0.012652944	0.023160419	0.016513562	0.016859492	0.411	0.505	0.479	0.468	0	0.952574127	0.952574127	0.952574127	0.049787068	-0.50396122	N
0.767295597	3.641581769	0.007791054	0.028893984	0.012519243	0.014399975	0.493	0.613	0.581	0.563166667	0	0.880797078	0.952574127	0.880797078	0.106819212	-0.388793037	N
0.650887574	3.244761907	0.008542614	0.015506927	0.010705891	0.011125122	0.419	0.642	0.5505	0.547541667	0	0.880797078	0.952574127	0.952574127	0.074738631	-0.2841835	N
0.631578947	3.46983819	0.010097825	0.014593757	0.012985373	0.01283555	0.134	0.449	0.2595	0.2785	0	0.952574127	0.952574127	0.952574127	0.049787068	-0.44582518	N
0.669491525	0.909307835	0.010633363	0.01403949	0.012590885	0.012289406	0.147	0.523	0.2985	0.320166667	0	0.952574127	0.952574127	0.952574127	0.049787068	-0.50396122	N
0.851648352	3.39677467	0.012800227	0.016460761	0.013256358	0.014172449	0.449	0.519	0.502	0.49	0	0.952574127	0.952574127	0.952574127	0.049787068	-0.661991359	N
0.59602649	6.412776024	0.01104008	0.012042217	0.011535272	0.01153919	0.454	0.553	0.54	0.515666667	0	0.952574127	0.952574127	0.952574127	0.049787068	-0.661991359	N
0.973913043	3.92029196	0.007791054	0.010463852	0.008733785	0.009061851	0.493	0.594	0.564	0.548333333	0	0.880797078	0.952574127	0.952574127	0.07830314	-0.475445148	N
0.756944444	2.245353892	0.007739131	0.010154623	0.008354758	0.008749504	0.552	0.588	0.585	0.575	0	0.880797078	0.880797078	0.880797078	0.135335283	-0.576443145	N
0.785714286	3.00012616	0.096587903	0.104686232	0.099967222	0.100413785	0.322	0.564	0.411	0.432333333	0.054545455	0.880797078	0.952574127	0.952574127	0.07830314	-0.633475288	N
0.779220779	1.910808065	0.007739131	0.016239628	0.011187731	0.011689314	0.358	0.588	0.497	0.491333333	0	0.880797078	0.952574127	0.92414182	0.092561176	-0.403051073	N
0.744094488	3.602453299	0.008462445	0.090813547	0.011238507	0.026940034	0.043	1	0.44	0.4158	0.008534851	0.880797078	0.952574127	0.952574127	0.066896711	-0.273743667	N
0.652777778	1.45294575	0.010239476	0.012871791	0.011345061	0.011380674	0.464	0.532	0.5155	0.505	0	0.952574127	0.952574127	0.952574127	0.049787068	-0.44582518	N
0.674418605	3.312892368	0.008338153	0.018632999	0.012220838	0.012843909	0.336	0.562	0.452	0.451533333	0.008746356	0.880797078	0.952574127	0.952574127	0.089709569	-0.272781044	N
0.824675325	2.175598796	0.007923498	0.009009366	0.008545636	0.008492833	0.288	0.381	0.313	0.327333333	0	0.952574127	0.952574127	0.952574127	0.049787068	-0.661991359	N
0.764367816	3.834727941	0.009566763	0.015203642	0.011300717	0.01180134	0.17	0.584	0.472	0.425266667	0	0.952574127	0.98201379	0.952574127	0.047688973	-0.301113925	N
0.748837209	1.922189372	0.013471605	0.018696043	0.01801117	0.016726273	0.178	0.194	0.18	0.184	0	0.952574127	0.952574127	0.952574127	0.049787068	-0.661991359	N
0.784	5.34881201	0.012220838	0.016239628	0.015426906	0.014629124	0.358	0.442	0.423	0.407666667	0	0.952574127	0.952574127	0.952574127	0.049787068	-0.661991359	N
0.604166667	3.813346147	0.012220838	0.016239628	0.015426906	0.014629124	0.358	0.442	0.423	0.407666667	0	0.952574127	0.952574127	0.952574127	0.049787068	-0.661991359	N
0.727848101	0.938673319	0.007908633	1	0.087968699	0.110519158	0.046	1	0.661	0.5694375	0.007171987	0.5	0.98201379	0.952574127	0.099194694	-0.179443185	N
0.848101266	0.766378986	0.007908633	0.011228428	0.009047473	0.009394844	0.053	0.062	0.056	0.057	0	0.952574127	0.952574127	0.952574127	0.049787068	-0.661991359	N
0.814285714	1.872955998	0.007923498	0.009009366	0.008545636	0.008492833	0.288	0.381	0.313	0.327333333	0	0.952574127	0.952574127	0.952574127	0.049787068	-0.661991359	N
0.839002268	1.70618587	0.010121308	0.01235069	0.010557488	0.011009829	0.455	0.516	0.489	0.486666667	0.009230769	0.952574127	0.952574127	0.952574127	0.049787068	-0.661991359	N
0.697802198	7.072056139	0.006253926	0.007127887	0.006501493	0.006627769	0.403	0.49	0.486	0.459666667	0	0.880797078	0.880797078	0.880797078	0.135335283	-0.576443145	N
0.693467337	1.889616017	0.009280509	0.012682407	0.011358728	0.011205844	0.318	0.474	0.4285	0.415666667	0.027522936	0.952574127	0.952574127	0.952574127	0.049787068	-0.424438126	N
0.602941176	1.573428865	0.011451229	1	0.11941081	0.152691447	0.322	1	0.653	0.615242424	0.009466709	0.5	0.98201379	0.952574127	0.108736162	-0.184995047	N
0.672413793	2.193187496	0.011636409	0.016562303	0.012350488	0.012973072	0.177	0.433	0.3415	0.32125	0	0.952574127	0.98201379	0.970687769	0.034051354	-0.342784278	N
0.857798165	1.068934211	0.01003353	0.0273303	0.014265371	0.014039095	0.072	0.519	0.435	0.389285714	0	0.880797078	0.952574127	0.952574127	0.070155691	-0.312018454	N
0.754807692	4.469401691	0.007739131	0.014656796	0.009784167	0.010083941	0.552	0.712	0.6185	0.625833333	0	0.880797078	0.952574127	0.880797078	0.106819212	-0.446929076	N
0.758241758	2.131253708	0.012208606	1	0.141745297	0.227862024	0.117	1	0.786	0.665305556	0.009229192	0.5	0.952574127	0.880797078	0.184694777	-0.122652373	N
0.687782805	4.881510605	0.012074636	0.01459608	0.012593743	0.013088153	0.47	0.542	0.511	0.507666667	0	0.880797078	0.880797078	0.880797078	0.135335283	-0.576443145	N
0.759090909	2.22523114	0.077496886	0.096747627	0.090368573	0.088746142	0.614	0.699	0.648	0.659666667	0.05106383	0.880797078	0.952574127	0.880797078	0.106819212	-0.368414123	N
0.810810811	0.785063042	0.010633363	0.01403949	0.012590885	0.012289406	0.147	0.523	0.2985	0.320166667	0	0.952574127	0.952574127	0.952574127	0.049787068	-0.50396122	N
0.770114943	3.192747941	0.010283304	0.011407638	0.010311374	0.010667439	0.352	0.457	0.403	0.404	0.157894737	0.880797078	0.952574127	0.952574127	0.07830314	-0.633475288	N
0.813131313	1.750011815	0.010457998	0.014265371	0.012895457	0.012492799	0.067	0.474	0.082	0.1552	0	0.880797078	0.952574127	0.952574127	0.064045104	-0.410180091	N
0.758064516	2.218308891	0.077496886	0.096747627	0.090368573	0.088746142	0.614	0.699	0.648	0.659666667	0.05106383	0.880797078	0.952574127	0.880797078	0.106819212	-0.368414123	N
0.873370577	1.651315425	0.009535976	1	0.017855365	0.09692384	0.339	1	0.514	0.574944444	0.003005677	0.5	0.952574127	0.952574127	0.113533843	-0.185940437	N
0.832432432	3.367522812	0.007923498	0.056627022	0.011155027	0.019473799	0.288	0.8	0.425	0.4568	0.003541913	0.952574127	0.98201379	0.952574127	0.045590878	-0.296368163	N
0.644444444	2.187730974	0.017833716	0.096747627	0.090368573	0.067879306	0.525	0.699	0.635	0.618222222	0.049723757	0.880797078	0.952574127	0.880797078	0.106819212	-0.342575884	N
0.82	1.608728779	0.008826251	0.023574461	0.013355174	0.014705486	0.147	0.688	0.5135	0.4924	0	0.880797078	0.98201379	0.952574127	0.063749568	-0.23890903	N
0.801470588	2.021780492	0.010520027	0.096747627	0.016782983	0.045770621	0.093	0.729	0.635	0.535285714	0.00778412	0.880797078	0.98201379	0.952574127	0.081954671	-0.258269471	N
0.717948718	3.419733166	0.010283304	0.018632999	0.012794424	0.013213747	0.352	0.524	0.468	0.4565	0.157894737	0.880797078	0.952574127	0.880797078	0.106819212	-0.388793037	N
0.805825243	1.660432493	0.007739131	0.021334741	0.008783486	0.01163376	0	0	0	0	0	0.880797078	0.98201379	0.952574127	0.058799866	-0.267189791	N
0.71657754	1.566064112	0.010886006	0.018247768	0.012208502	0.013573064	0.034	0.573	0.2765	0.290333333	0	0.880797078	0.952574127	0.880797078	0.121077247	-0.374535001	N
0.843243243	3.300298538	0.010598496	0.017999728	0.014929899	0.014406645	0.354	0.577	0.471	0.477	0	0.952574127	0.98201379	0.952574127	0.042793417	-0.361752724	N
0.792746114	2.198965486	0.015810747	0.045943153	0.026443743	0.028344213	0	0	0	0	0	0.952574127	0.952574127	0.952574127	0.049787068	-0.44582518	N
0.678787879	1.610483073	0.010665895	0.018793202	0.012191821	0.013817872	0.128	0.542	0.258	0.297333333	0	0.952574127	0.952574127	0.952574127	0.049787068	-0.373769787	N
0.697435897	6.257560587	0.011094407	0.01814793	0.012673622	0.013146383	0.067	0.533	0.082	0.215777778	0	0.952574127	0.952574127	0.952574127	0.049787068	-0.661991359	N
0.772972973	2.132688419	0.007343573	0.015068107	0.010047642	0.010431171	0.088	0.476	0.352	0.315166667	0	0.880797078	0.98201379	0.952574127	0.052982158	-0.268567048	N
0.72815534	1.567934067	0.007984314	0.170035068	0.019481289	0.074751724	0.036	0.815	0.527	0.541904762	0.016114593	0.880797078	0.952574127	0.952574127	0.07830314	-0.274235746	N
0.74368231	3.289669314	0.007944965	0.016930839	0.012226888	0.012175072	0.378	0.516	0.475	0.459888889	0	0.880797078	0.952574127	0.952574127	0.07830314	-0.422768435	N
0.739336493	1.331083868	0.009489871	0.034220501	0.017173285	0.019703157	0.053	0.555	0.366	0.293333333	0.023622047	0.952574127	0.952574127	0.952574127	0.049787068	-0.424438126	N
0.81147541	1.300350275	0.007791054	0.010110063	0.008586406	0.008829175	0.493	0.594	0.58	0.555666667	0	0.880797078	0.952574127	0.952574127	0.07830314	-0.633475288	N
0.61682243	1.352195052	0.009746939	0.011755392	0.010999493	0.010759963	0.034	0.53	0.2365	0.266666667	0	0.880797078	0.952574127	0.952574127	0.07830314	-0.417309109	N
0.773504274	1.724314618	0.134254826	0.170035068	0.154160498	0.154806328	0.715	0.815	0.799	0.773555556	0.018163471	0.880797078	0.952574127	0.880797078	0.106819212	-0.368414123	N
0.747663551	1.410349955	0.011819289	0.126001123	0.01430177	0.030118535	0.201	0.687	0.517	0.495904762	0.022944551	0.952574127	0.993307149	0.952574127	0.038193955	-0.280481444	N
0.808080808	1.992365256	0.008060743	0.014757293	0.010350604	0.01111621	0.306	0.563	0.424	0.424444444	0	0.952574127	0.98201379	0.952574127	0.042793417	-0.348750541	N
0.761904762	2.204647832	0.012002987	0.057964277	0.015426906	0.020153027	0.358	0.618	0.528	0.515277778	0.003468208	0.880797078	0.952574127	0.952574127	0.072599926	-0.295770525	N
0.841025641	6.24272136	0.012327982	0.071808223	0.043088236	0.042154312	0.421	0.558	0.5	0.4905	0.157894737	0.952574127	0.98201379	0.952574127	0.039296592	-0.434928603	N
0.754601227	1.911441262	0.017811279	1	0.149044846	0.245592931	0.527	1	0.786	0.764625	0.008836524	0.5	0.952574127	0.880797078	0.188563945	-0.143793959	N
0.7265625	1.547845563	0.007427155	0.02064206	0.010459236	0.01193574	0.043	0.635	0.43	0.367717949	0.000836412	0.880797078	0.98201379	0.952574127	0.072302133	-0.215339974	N
0.551470588	2.454593751	0.009379103	0.033415829	0.024474429	0.021492982	0.374	0.532	0.475	0.483333333	0.015075377	0.880797078	0.952574127	0.952574127	0.087808497	-0.316737644	N
0.766871166	1.835604825	0.013578387	0.015062951	0.01460467	0.014415336	0.372	0.389	0.379	0.38	0.027522936	0.880797078	0.952574127	0.952574127	0.07830314	-0.633475288	N
0.849056604	2.861178498	0.009515716	0.022517246	0.017964759	0.015552451	0.069	0.534	0.18	0.251777778	0	0.880797078	0.952574127	0.952574127	0.07830314	-0.345253716	N
0.931034483	2.096695358	0.077496886	0.096747627	0.090368573	0.088746142	0.614	0.699	0.648	0.659666667	0.05106383	0.880797078	0.952574127	0.880797078	0.106819212	-0.368414123	N
0.651898734	11.94124514	0.014062084	0.01686271	0.015073343	0.015316658	0.195	0.523	0.3435	0.35	0.036809816	0.952574127	0.952574127	0.952574127	0.049787068	-0.661991359	N
0.725888325	4.072188881	0.014285538	0.014678366	0.014473989	0.014479297	0.368	0.441	0.424	0.411	0	0.952574127	0.952574127	0.952574127	0.049787068	-0.661991359	N
0.763636364	2.411376627	0.077496886	0.096747627	0.090368573	0.088746142	0.614	0.699	0.648	0.659666667	0.05106383	0.880797078	0.952574127	0.880797078	0.106819212	-0.368414123	N
0.6	1.211612637	0.034435206	0.040851451	0.03586874	0.037051799	0.4	0.514	0.439	0.451	0	0.880797078	0.98201379	0.880797078	0.096328735	-0.615449693	N
0.738636364	3.614382585	0.010997738	0.015209778	0.013066229	0.013083292	0.069	0.469	0.2225	0.253416667	0	0.952574127	0.98201379	0.952574127	0.039296592	-0.348750541	N
0.716312057	1.891373206	0.009336046	0.015549473	0.012184185	0.012080763	0.41	0.573	0.492	0.486222222	0	0.880797078	0.952574127	0.952574127	0.07830314	-0.396930195	N
0.631578947	1.289952604	0.122149267	0.142497368	0.132723722	0.133707054	0.68	0.826	0.763	0.756444444	0.015371477	0.731058579	0.952574127	0.952574127	0.113646737	-0.326243001	N
0.752336449	1.553166124	0.008669266	0.096747627	0.085719703	0.069055135	0.314	0.699	0.64	0.586583333	0.039087948	0.880797078	0.952574127	0.92414182	0.092561176	-0.324036003	N
0.756345178	4.489041779	0.008669266	0.011817125	0.009459954	0.009982115	0.314	0.407	0.381	0.367333333	0	0.952574127	0.952574127	0.952574127	0.049787068	-0.661991359	N
0.784776903	2.983285472	0.010283304	0.011407638	0.010311374	0.010667439	0.352	0.457	0.403	0.404	0.157894737	0.880797078	0.952574127	0.952574127	0.07830314	-0.633475288	N
0.765957447	1.67961515	0.010886006	0.017227027	0.012857124	0.01323435	0.034	0.216	0.1255	0.125	0	0.880797078	0.952574127	0.952574127	0.07830314	-0.395922055	N
0.75862069	2.585750971	0.007923498	0.013939899	0.010706387	0.010919461	0.288	0.524	0.4185	0.414166667	0	0.952574127	0.98201379	0.970687769	0.034051354	-0.461560895	N
0.666666667	2.661448701	0.072651751	0.076581729	0.072927532	0.074053671	0.695	0.759	0.737	0.730333333	0.023715415	0.880797078	0.952574127	0.952574127	0.07830314	-0.633475288	N
0.732984293	1.756564393	0.011451229	0.170035068	0.066356103	0.08054228	0.285	0.801	0.463	0.539055556	0.013648772	0.880797078	0.952574127	0.952574127	0.084006354	-0.269417524	N
0.723404255	1.225905597	0.013578387	0.2373034	0.125102037	0.124983448	0.322	0.801	0.669	0.646298246	0.004716628	0.731058579	0.98201379	0.952574127	0.082227317	-0.192875899	N
0.802816901	4.646575061	0.011618804	0.047040774	0.023422529	0.026243	0.392	0.7	0.5555	0.559	0.023622047	0.952574127	0.993307149	0.970687769	0.030192123	-0.436165214	N
0.838862559	2.692112649	0.017153798	0.076581729	0.04651497	0.046189417	0.42	0.759	0.591	0.595166667	0.004758128	0.880797078	0.952574127	0.880797078	0.106819212	-0.388793037	N
0.794642857	2.355748985	0.008052069	0.01707905	0.010427408	0.010869454	0.473	0.641	0.5765	0.5682	0.000230185	0.880797078	0.952574127	0.952574127	0.069748319	-0.262232753	N
0.763157895	2.570274567	0.010665895	0.022921403	0.012612056	0.015142881	0.254	0.65	0.509	0.451	0	0.880797078	0.952574127	0.952574127	0.07830314	-0.371091955	N
0.684210526	2.764392011	0.012201628	0.015209433	0.012773077	0.013394713	0.218	0.229	0.221	0.222666667	0	0.952574127	0.98201379	0.98201379	0.028806115	-0.682972312	N
0.780392157	1.046870429	0.009489871	0.021451185	0.012296636	0.013653503	0.053	0.475	0.2175	0.246833333	0	0.952574127	0.952574127	0.952574127	0.049787068	-0.416570269	N
0.659090909	3.703473491	0.012208606	0.02499673	0.015975478	0.016484911	0.145	0.615	0.464	0.392555556	0	0.952574127	0.952574127	0.952574127	0.049787068	-0.44582518	N
0.739583333	2.611440617	0.008308969	0.057964277	0.014641741	0.018021921	0.071	0.618	0.488	0.454481481	0.002775208	0.880797078	0.952574127	0.952574127	0.066081966	-0.288871419	N
0.77826087	3.388401039	0.010283304	0.019196467	0.014323582	0.014318274	0	0	0	0	0.016574586	0.880797078	0.98201379	0.952574127	0.077318021	-0.336733478	N
0.734597156	2.243595675	0.012074636	0.01459608	0.012593743	0.013088153	0.47	0.542	0.511	0.507666667	0	0.880797078	0.880797078	0.880797078	0.135335283	-0.576443145	N
0.710344828	1.85437526	0.009489871	0.021451185	0.016004956	0.015175456	0.053	0.497	0.43	0.346833333	0	0.952574127	0.952574127	0.952574127	0.049787068	-0.309041309	N
0.735135135	3.637959159	0.014285538	0.014678366	0.014473989	0.014479297	0.368	0.441	0.424	0.411	0	0.952574127	0.952574127	0.952574127	0.049787068	-0.661991359	N
0.603174603	2.682860343	0.012220838	0.045943153	0.015426906	0.023977398	0.358	0.825	0.479	0.564444444	0	0.952574127	0.952574127	0.952574127	0.049787068	-0.44582518	N
0.692810458	2.134913035	0.115848743	0.203500253	0.14665942	0.152850163	0.631	0.742	0.684	0.681866667	0.010155721	0.880797078	0.98201379	0.952574127	0.068403735	-0.28724302	N
0.803468208	2.190019793	0.007427155	0.01801814	0.010756634	0.011505482	0.041	0.53	0.4365	0.4008	0.000845964	0.880797078	0.98201379	0.952574127	0.058046354	-0.23926825	N
0.754716981	2.506681967	0.007923498	0.056627022	0.029139344	0.03088225	0.288	0.8	0.524	0.5315	0.016574586	0.952574127	0.98201379	0.952574127	0.039296592	-0.434928603	N
0.593220339	1.352677585	0.008136516	0.021353484	0.014473989	0.014191437	0.097	0.519	0.415	0.3212	0	0.952574127	0.952574127	0.952574127	0.049787068	-0.325427239	N
0.764705882	1.018367518	0.007407128	0.014055775	0.010192223	0.010781711	0.381	1	0.719	0.707	0.005940594	0.880797078	0.952574127	0.952574127	0.064045104	-0.431567144	N
0.863945578	4.108444828	0.010259366	0.020022646	0.014616994	0.014754942	0.059	1	0.473	0.489266667	0.016100179	0.880797078	0.952574127	0.952574127	0.056916086	-0.314572782	N
0.784482759	3.250169216	0.008240604	0.010021899	0.009640281	0.009300928	0.412	0.471	0.435	0.439333333	0.018404908	0.952574127	0.952574127	0.952574127	0.049787068	-0.661991359	N
0.810126582	1.093032388	0.401131294	1	0.43674396	0.612625085	0.786	1	0.872	0.886	0.162162162	0.5	0.880797078	0.880797078	0.423556855	-0.288221572	N
0.751381215	1.966150394	0.007921207	1	0.085719703	0.104319016	0.371	1	0.6285	0.624857143	0.009884679	0.5	0.98201379	0.952574127	0.102003703	-0.187382273	N
0.740506329	0.924063943	0.009746939	0.018115902	0.0120538	0.012612117	0.432	0.586	0.528	0.524833333	0	0.880797078	0.952574127	0.92414182	0.092561176	-0.403051073	N
0.748538012	1.568659235	0.009971321	0.01978246	0.012883989	0.013535954	0.437	0.566	0.515	0.511133333	0	0.880797078	0.952574127	0.952574127	0.055490283	-0.338327557	N
0.819047619	2.697197925	0.013471605	0.018696043	0.01801117	0.016726273	0.178	0.194	0.18	0.184	0	0.952574127	0.952574127	0.952574127	0.049787068	-0.661991359	N
0.612903226	4.60431263	0.010010797	0.020410851	0.011518857	0.013809146	0.536	0.626	0.605	0.594333333	0	0.880797078	0.880797078	0.880797078	0.135335283	-0.418413005	N
0.755952381	1.942327212	0.010097825	0.014593757	0.012985373	0.01283555	0.134	0.449	0.2595	0.2785	0	0.952574127	0.952574127	0.952574127	0.049787068	-0.44582518	N
0.75	1.046305619	0.007908633	0.203500253	0.110150367	0.09840748	0.053	0.801	0.6	0.532435897	0.005304258	0.880797078	0.98201379	0.952574127	0.080848973	-0.202996254	N
0.748603352	3.681525308	0.020473123	0.051764271	0.025335375	0.030393206	0.576	0.626	0.576	0.584666667	0.013318535	0.952574127	0.952574127	0.952574127	0.049787068	-0.330889047	N
0.832258065	1.619542351	0.016330971	0.203500253	0.129269473	0.114540683	0.465	0.742	0.669	0.624444444	0.005260082	0.880797078	0.952574127	0.880797078	0.106819212	-0.342575884	N
0.726495726	2.833604994	0.009270832	0.012483385	0.009664133	0.010472783	0.432	0.515	0.514	0.487	0	0.880797078	0.880797078	0.880797078	0.135335283	-0.576443145	N
0.72972973	1.875292164	0.008737444	0.090813547	0.012607814	0.027667613	0.09	1	0.509	0.552142857	0.008060905	0.880797078	0.98201379	0.952574127	0.071981456	-0.221468459	N
0.751412429	3.513381528	0.007923498	0.018618667	0.011821291	0.012312812	0.288	0.593	0.4725	0.450833333	0	0.952574127	0.952574127	0.952574127	0.049787068	-0.424438126	N
0.758139535	1.669005134	0.010997738	0.019773231	0.013498926	0.014255532	0.082	0.622	0.454	0.401866667	0	0.952574127	0.952574127	0.952574127	0.049787068	-0.345253716	N
0.791666667	2.29537873	0.009130801	0.020210374	0.015350195	0.014944019	0.095	0.455	0.2365	0.242583333	0	0.952574127	0.952574127	0.952574127	0.049787068	-0.3522761	N
0.808743169	2.205861021	0.020342239	0.096747627	0.085719703	0.071741472	0.569	0.699	0.64	0.640083333	0.036923077	0.880797078	0.952574127	0.92414182	0.092561176	-0.313342476	N
0.831858407	3.540308491	0.010823604	0.011300717	0.010853149	0.01099249	0.472	0.584	0.571	0.542333333	0	0.952574127	0.98201379	0.952574127	0.039296592	-0.672481836	N
0.7875	1.370833386	0.010633363	0.02789962	0.013128144	0.015006366	0.45	1	0.561	0.655	0	0.952574127	0.952574127	0.952574127	0.049787068	-0.327048564	N
0.545454545	1.67674397	0.007427155	0.014035324	0.009092229	0.009568904	0.043	0.488	0.391	0.316285714	0.000997893	0.880797078	0.952574127	0.952574127	0.070155691	-0.241191211	N
0.722543353	4.336683549	0.010239476	0.076581729	0.041917293	0.042399368	0.479	0.759	0.607	0.616833333	0.01511335	0.880797078	0.952574127	0.952574127	0.064045104	-0.431567144	N
0.824817518	3.92332261	0.021711884	0.024398837	0.022078565	0.022729762	0.459	0.529	0.522	0.503333333	0	0.98201379	0.98201379	0.98201379	0.018315639	-0.693462789	N
0.809090909	1.050614948	0.01365586	0.104686232	0.091890231	0.068713618	0.17	0.564	0.333	0.348555556	0.055045872	0.880797078	0.952574127	0.952574127	0.07830314	-0.326243001	N
0.67114094	1.27981224	0.016996906	0.020210374	0.017357491	0.018188257	0.279	0.306	0.295	0.293333333	0	0.952574127	0.952574127	0.952574127	0.049787068	-0.661991359	N
0.676923077	2.989582586	0.084575487	0.096747627	0.092320563	0.091976994	0.614	0.699	0.6465	0.653666667	0.062068966	0.880797078	0.880797078	0.880797078	0.135335283	-0.418413005	N
0.804	1.925429045	0.010957385	0.01494532	0.012384726	0.012573463	0.38	0.557	0.4885	0.490166667	0	0.952574127	0.98201379	0.970687769	0.034051354	-0.461560895	N
0.725118483	2.5115862	0.008776634	0.012160414	0.010092512	0.010267236	0.385	0.685	0.5485	0.550333333	0	0.952574127	0.952574127	0.952574127	0.049787068	-0.44582518	N
0.688622754	3.798018972	0.008052069	0.012423737	0.010331253	0.010301445	0.396	0.641	0.589	0.5665	0	0.880797078	0.952574127	0.952574127	0.068797783	-0.302082359	N
0.698113208	2.203641291	0.011977787	0.01463434	0.013031106	0.013214411	0.371	0.467	0.452	0.43	0	0.952574127	0.98201379	0.952574127	0.039296592	-0.672481836	N
0.763313609	4.478453456	0.007427155	0.021451185	0.01426186	0.013102436	0.046	0.529	0.386	0.339444444	0.005743459	0.880797078	0.952574127	0.952574127	0.056123973	-0.239176507	N
0.80239521	2.426396643	0.010501948	0.024348508	0.015393148	0.015863329	0.149	0.543	0.427	0.375166667	0	0.880797078	0.98201379	0.952574127	0.049590045	-0.251624089	N
0.805825243	1.887073433	0.134254826	0.170035068	0.154160498	0.154806328	0.715	0.815	0.799	0.773555556	0.018163471	0.880797078	0.952574127	0.880797078	0.106819212	-0.368414123	N
0.756578947	2.67645859	0.072651751	0.076581729	0.072927532	0.074053671	0.695	0.759	0.737	0.730333333	0.023715415	0.880797078	0.952574127	0.952574127	0.07830314	-0.633475288	N
0.769230769	2.340664121	0.122149267	0.142497368	0.1329238	0.134016086	0.68	0.786	0.7215	0.728	0.019575856	0.731058579	0.952574127	0.880797078	0.145576571	-0.350035677	N
0.781350482	6.228023021	0.021358606	0.03032815	0.021416908	0.024367888	0.507	0.548	0.537	0.530666667	0	0.952574127	0.952574127	0.952574127	0.049787068	-0.661991359	N
0.751173709	2.82871201	0.012074636	0.016874211	0.01375446	0.013989878	0.47	0.553	0.5265	0.520833333	0	0.880797078	0.952574127	0.92414182	0.092561176	-0.403051073	N
0.642857143	2.027987522	0.012199922	1	0.207583179	0.31272391	0.421	1	0.647	0.679	0.033149171	0.5	0.98201379	0.952574127	0.220936247	-0.24542109	N
0.761904762	1.965407138	0.122149267	0.142497368	0.1329238	0.134016086	0.68	0.786	0.7215	0.728	0.019575856	0.731058579	0.952574127	0.880797078	0.145576571	-0.350035677	N
0.785365854	2.306923576	0.072651751	0.076581729	0.072927532	0.074053671	0.695	0.759	0.737	0.730333333	0.023715415	0.880797078	0.952574127	0.952574127	0.07830314	-0.633475288	N
0.781420765	0.979909019	0.122149267	0.2373034	0.140993226	0.152132589	0.631	0.826	0.698	0.721266667	0.013194063	0.731058579	0.952574127	0.952574127	0.08810287	-0.274622775	N
0.740506329	2.03276591	0.007923498	0.009009366	0.008545636	0.008492833	0.288	0.381	0.313	0.327333333	0	0.952574127	0.952574127	0.952574127	0.049787068	-0.661991359	N
0.79558011	2.111503221	0.077496886	0.096747627	0.090368573	0.088746142	0.614	0.699	0.648	0.659666667	0.05106383	0.880797078	0.952574127	0.880797078	0.106819212	-0.368414123	N
0.642105263	2.55741072	0.011626649	0.019290054	0.013602536	0.013938536	0.17	0.533	0.2965	0.335444444	0	0.952574127	0.952574127	0.952574127	0.049787068	-0.312703544	N
0.627329193	1.747726048	0.116292644	0.12717351	0.117419754	0.120295302	0.285	0.586	0.385	0.418666667	0.157894737	1	0				N
0.550632911	3.738831228	0.010823604	0.011300717	0.010853149	0.01099249	0.472	0.584	0.571	0.542333333	0	0.952574127	0.98201379	0.952574127	0.039296592	-0.672481836	N
0.797202797	10.18833345	0.037095126	0.05278718	0.042378596	0.043946771	0.497	0.753	0.677	0.649555556	0.018480493	0.880797078	0.952574127	0.952574127	0.059292426	-0.36426443	N
0.76284585	5.53444388	0.013517033	0.016942413	0.013745352	0.014734933	0.455	0.506	0.506	0.489	0	0.880797078	0.880797078	0.880797078	0.135335283	-0.576443145	N
0.803797468	4.825195134	0.012841453	0.016739458	0.013928918	0.014503277	0.553	0.619	0.61	0.594	0	0.880797078	0.880797078	0.880797078	0.135335283	-0.576443145	N
0.767326733	3.550077029	0.012652944	0.015562817	0.014101844	0.014105868	0.43	0.505	0.504	0.479666667	0	0.952574127	0.952574127	0.952574127	0.049787068	-0.661991359	N
0.70292887	3.653544679	0.008462445	0.010459236	0.008605363	0.009175681	0.043	0.053	0.047	0.047666667	0	0.952574127	0.952574127	0.952574127	0.049787068	-0.661991359	N
0.772	1.836024807	0.008052069	0.012423737	0.010018454	0.009905177	0.487	0.641	0.5875	0.575416667	0	0.880797078	0.952574127	0.952574127	0.053351577	-0.294670047	N
0.852941176	2.165724658	0.007739131	0.019456326	0.010405793	0.012067559	0.489	0.614	0.572	0.567466667	0	0.880797078	0.952574127	0.952574127	0.066896711	-0.317619362	N
0.824120603	1.90607161	0.007791054	0.010110063	0.008586406	0.008829175	0.493	0.594	0.58	0.555666667	0	0.880797078	0.952574127	0.952574127	0.07830314	-0.633475288	N
0.753926702	2.100694244	0.091756143	0.160982369	0.110842957	0.117179109	0.542	0.723	0.643	0.6392	0.006827492	0.880797078	0.98201379	0.952574127	0.077712068	-0.288200473	N
0.80625	3.167102628	0.01104008	0.03077224	0.022567886	0.020632134	0.454	0.585	0.5465	0.539833333	0	0.952574127	0.952574127	0.952574127	0.049787068	-0.44582518	N
0.553571429	3.522935242	0.008776634	0.015203642	0.01091458	0.011219977	0.385	0.685	0.48	0.522888889	0	0.952574127	0.952574127	0.952574127	0.049787068	-0.373769787	N
0.800995025	1.605403876	0.010886006	0.011755392	0.011284916	0.011308771	0.034	0.041	0.037	0.037333333	0	0.880797078	0.952574127	0.880797078	0.106819212	-0.604959216	N
0.807692308	1.312324194	0.012201628	0.015209433	0.012773077	0.013394713	0.218	0.229	0.221	0.222666667	0	0.952574127	0.98201379	0.98201379	0.028806115	-0.682972312	N
0.80349345	1.295086571	0.096587903	0.104686232	0.099967222	0.100413785	0.322	0.564	0.411	0.432333333	0.054545455	0.880797078	0.952574127	0.952574127	0.07830314	-0.633475288	N
0.654320988	1.16887061	0.148751346	0.2373034	0.167793385	0.1709764	0.356	0.698	0.5955	0.558083333	0.010407632	0.952574127	0.98201379	0.952574127	0.041919211	-0.371204723	N
0.724324324	3.629718969	0.009121854	0.024398837	0.01458813	0.01512215	0.151	0.553	0.4455	0.389233333	0.005366726	0.880797078	0.98201379	0.952574127	0.049130322	-0.263756791	N
0.868613139	1.654874607	0.011138244	0.015255684	0.012689993	0.013045098	0.389	0.533	0.496	0.48975	0	0.952574127	0.952574127	0.952574127	0.049787068	-0.42494615	N
0.72195122	2.885382665	0.007427155	0.170035068	0.012327982	0.050119823	0.24	0.815	0.484	0.527666667	0.003461348	0.880797078	0.98201379	0.952574127	0.076395781	-0.219964291	N
0.674157303	1.319184287	0.007791054	0.010110063	0.008586406	0.008829175	0.493	0.594	0.58	0.555666667	0	0.880797078	0.952574127	0.952574127	0.07830314	-0.633475288	N
0.770700637	3.20430483	0.092815029	1	0.161335829	0.216995189	0.356	1	0.6855	0.69297619	0.007005039	0.5	0.98201379	0.952574127	0.119804776	-0.163954297	N
0.796875	0.680485183	0.010633363	0.072003548	0.013098305	0.031452891	0.147	0.687	0.507	0.435111111	0	0.880797078	0.952574127	0.952574127	0.068797783	-0.361586598	N
0.797468354	0.87028599	0.013578387	0.015062951	0.01460467	0.014415336	0.372	0.389	0.379	0.38	0.027522936	0.880797078	0.952574127	0.952574127	0.07830314	-0.633475288	N
0.766871166	1.912358379	0.122149267	0.142497368	0.132723722	0.133707054	0.68	0.826	0.763	0.756444444	0.015371477	0.731058579	0.952574127	0.952574127	0.113646737	-0.326243001	N
0.578947368	2.016038778	0.017833716	0.096747627	0.082492509	0.065237717	0.525	0.699	0.635	0.618222222	0.04137931	0.880797078	0.952574127	0.952574127	0.07830314	-0.345253716	N
0.811688312	0.833211609	0.091756143	0.160982369	0.110907038	0.118701521	0.542	0.723	0.636	0.638416667	0.008540925	0.880797078	0.98201379	0.92414182	0.089938557	-0.297590602	N
0.816037736	1.545928917	0.096587903	1	0.176762738	0.267076676	0.322	1	0.7345	0.70125	0.027734977	0.5	0.952574127	0.880797078	0.19313264	-0.183702992	N
0.754010695	7.862869189	0.01104008	0.012042217	0.011535272	0.01153919	0.454	0.553	0.54	0.515666667	0	0.952574127	0.952574127	0.952574127	0.049787068	-0.661991359	N
0.736842105	3.763384095	0.011055899	0.013884344	0.011677637	0.01220596	0.295	0.319	0.309	0.307666667	0	0.98201379	0.98201379	0.98201379	0.018315639	-0.693462789	N
0.735294118	1.760062662	0.00463336	0.011228428	0.007908633	0.007402727	0.053	0.54	0.399	0.315	0	0.952574127	0.952574127	0.952574127	0.049787068	-0.39010267	N
0.739316239	1.453807229	0.007984314	0.009207025	0.008463629	0.008551656	0.465	0.527	0.491	0.494333333	0	0.952574127	0.952574127	0.952574127	0.049787068	-0.661991359	N
0.777777778	2.308208365	0.009518475	0.022314267	0.013384378	0.013598193	0.202	0.546	0.3615	0.368366667	0.004590666	0.880797078	0.98201379	0.952574127	0.05054058	-0.243174773	N
0.837837838	1.655266768	0.008300181	0.008783486	0.008322838	0.008468835	0.312	0.372	0.371	0.351666667	0	0.952574127	0.952574127	0.952574127	0.049787068	-0.661991359	N
0.648241206	2.42895495	0.008650815	0.011870271	0.010526179	0.010289268	0.247	0.519	0.4035	0.3995	0	0.952574127	0.98201379	0.970687769	0.034051354	-0.440173841	N
0.804938272	2.533387635	0.011910559	0.061763004	0.04712397	0.040385959	0.452	0.822	0.712	0.679	0.013318535	0.880797078	0.952574127	0.952574127	0.07830314	-0.277343615	N
0.795348837	4.769255662	0.010691561	0.014978117	0.012461822	0.012482787	0.396	0.532	0.487	0.472777778	0.000561115	0.880797078	0.880797078	0.880797078	0.135335283	-0.339898052	N
0.747126437	6.338682901	0.010010797	0.020410851	0.012834166	0.01387632	0.521	0.61	0.547	0.560166667	0	0.880797078	0.952574127	0.880797078	0.106819212	-0.388793037	N
0.786516854	2.046531213	0.010823604	0.011300717	0.010853149	0.01099249	0.472	0.584	0.571	0.542333333	0	0.952574127	0.98201379	0.952574127	0.039296592	-0.672481836	N
0.751445087	1.449736016	0.012220838	0.028036073	0.018803363	0.019975385	0.358	0.527	0.449	0.454333333	0	0.952574127	0.952574127	0.952574127	0.049787068	-0.424438126	N
0.819004525	1.703022363	0.007944965	0.01814793	0.009575306	0.01087024	0.403	0.533	0.484	0.480666667	0	0.880797078	0.952574127	0.952574127	0.07830314	-0.345253716	N
0.832	3.448221166	0.010283304	0.011407638	0.010311374	0.010667439	0.352	0.457	0.403	0.404	0.157894737	0.880797078	0.952574127	0.952574127	0.07830314	-0.633475288	N
0.747311828	2.311718898	0.012281022	0.156553937	0.079683683	0.081737294	0.304	0.559	0.436	0.435666667	0.032967033	0.952574127	0.98201379	0.952574127	0.039296592	-0.427060746	N
0.806666667	3.337631853	0.012015926	0.019290054	0.014410201	0.014477849	0.449	0.542	0.511	0.503222222	0	0.880797078	0.952574127	0.952574127	0.087808497	-0.387424838	N
0.712707182	3.219535554	0.010283304	0.022422564	0.01450314	0.014851552	0.151	0.553	0.492	0.433944444	0.007915567	0.880797078	0.952574127	0.952574127	0.07830314	-0.312092771	N
0.907142857	1.530194877	0.015704408	1	0.138718593	0.193292913	0.322	1	0.673	0.675958333	0.004269225	0.5	0.98201379	0.952574127	0.110396908	-0.154376682	N
0.681818182	1.368789153	0.009379103	0.013526331	0.010811569	0.011077125	0.116	0.475	0.2465	0.277	0.023622047	0.952574127	0.952574127	0.952574127	0.049787068	-0.44582518	N
0.805405405	3.534737623	0.072651751	0.076581729	0.072927532	0.074053671	0.695	0.759	0.737	0.730333333	0.023715415	0.880797078	0.952574127	0.952574127	0.07830314	-0.633475288	N
0.801724138	3.693209597	0.013019854	0.020214804	0.013666865	0.015633841	0.455	0.515	0.512	0.494	0	0.880797078	0.952574127	0.952574127	0.07830314	-0.633475288	N
0.598484848	2.19596877	0.084575487	0.096747627	0.092320563	0.091976994	0.614	0.699	0.6465	0.653666667	0.062068966	0.880797078	0.880797078	0.880797078	0.135335283	-0.418413005	N
0.727699531	1.425354027	0.010633363	0.018683167	0.013280754	0.014623525	0.45	1	0.574	0.686555556	0	0.952574127	0.952574127	0.952574127	0.049787068	-0.373769787	N
0.791907514	1.057704509	0.012482469	0.019886137	0.013903157	0.015422947	0.464	0.561	0.512	0.510166667	0	0.880797078	0.952574127	0.880797078	0.106819212	-0.446929076	N
0.765306122	5.632642761	0.008240604	0.010021899	0.009640281	0.009300928	0.412	0.471	0.435	0.439333333	0.018404908	0.952574127	0.952574127	0.952574127	0.049787068	-0.661991359	N
0.721088435	1.512812795	0.011451229	0.023947179	0.01303022	0.014656182	0.127	0.606	0.446	0.401133333	0	0.952574127	0.952574127	0.952574127	0.049787068	-0.332395327	N
0.754385965	7.562266301	0.006253926	0.007127887	0.006501493	0.006627769	0.403	0.49	0.486	0.459666667	0	0.880797078	0.880797078	0.880797078	0.135335283	-0.576443145	N
0.632653061	1.835838354	0.034435206	0.040851451	0.03586874	0.037051799	0.4	0.514	0.439	0.451	0	0.880797078	0.98201379	0.880797078	0.096328735	-0.615449693	N
0.694174757	3.476487292	0.016254485	0.021099524	0.018512479	0.018622162	0.657	0.657	0.657	0.657	0	0.98201379	0.98201379	0.98201379	0.018315639	-0.693462789	N
0.84057971	1.916885323	0.009566763	0.015203642	0.011981973	0.012003023	0.385	0.494	0.4705	0.456166667	0	0.952574127	0.952574127	0.952574127	0.049787068	-0.44582518	N
0.722772277	2.792745278	0.122149267	0.142497368	0.132723722	0.133707054	0.68	0.826	0.763	0.756444444	0.015371477	0.731058579	0.952574127	0.952574127	0.113646737	-0.326243001	N
0.837837838	1.208885799	0.009535976	0.021334741	0.014041533	0.014656514	0.409	1	0.5725	0.679	0	0.880797078	0.952574127	0.952574127	0.068797783	-0.273198322	N
0.863157895	3.044964804	0.007791054	0.010110063	0.008586406	0.008829175	0.493	0.594	0.58	0.555666667	0	0.880797078	0.952574127	0.952574127	0.07830314	-0.633475288	N
0.807881773	1.899051123	0.122149267	0.142497368	0.132723722	0.133707054	0.68	0.826	0.763	0.756444444	0.015371477	0.731058579	0.952574127	0.952574127	0.113646737	-0.326243001	N
0.706467662	2.861829193	0.015188366	0.030506308	0.023609866	0.022879693	0.519	0.717	0.604	0.611444444	0.027692308	0.98201379	0.98201379	0.98201379	0.018315639	-0.535432649	N
0.724832215	1.62509957	0.007427155	0.018299527	0.011467952	0.011721454	0.24	0.53	0.4265	0.411625	0.001343935	0.880797078	0.98201379	0.952574127	0.072116012	-0.241297878	N
0.646666667	1.803269461	0.013664846	0.015276852	0.014612994	0.014521947	0.069	0.492	0.24	0.2665	0	0.98201379	0.98201379	0.98201379	0.018315639	-0.47729661	N
0.806060606	3.859763193	0.01128443	0.025771847	0.013906408	0.01574402	0.205	0.447	0.365	0.341333333	0	0.952574127	0.98201379	0.952574127	0.039296592	-0.365249549	N
0.724550898	1.754864974	0.010957385	0.01494532	0.012384726	0.012573463	0.38	0.557	0.4885	0.490166667	0	0.952574127	0.98201379	0.970687769	0.034051354	-0.461560895	N
0.752688172	2.162170522	0.009270102	0.014254949	0.010776754	0.011433935	0.314	0.355	0.349	0.339333333	0	0.952574127	0.952574127	0.952574127	0.049787068	-0.661991359	N
0.816831683	2.776312892	0.009518475	0.11097112	0.013771816	0.021076641	0.202	0.629	0.384	0.392805556	0.004233483	0.880797078	0.98201379	0.952574127	0.056669806	-0.225497098	N
0.765306122	5.206091848	0.007164789	0.008982644	0.00785103	0.007999488	0.505	0.557	0.54	0.534	0	0.952574127	0.952574127	0.952574127	0.049787068	-0.661991359	N
0.550632911	1.503462342	0.011420843	0.016601022	0.011835311	0.012678594	0.464	1	0.766	0.753333333	0	0.952574127	0.952574127	0.952574127	0.049787068	-0.44582518	N
0.767295597	1.558344023	0.011451229	0.2373034	0.01303022	0.073222421	0.339	0.694	0.451	0.500222222	0.011857708	0.952574127	0.952574127	0.952574127	0.049787068	-0.36426443	N
0.758426966	3.279035548	0.009981608	0.017410749	0.013408066	0.013692811	0.387	0.629	0.4985	0.491125	0.000270538	0.880797078	0.952574127	0.952574127	0.085432158	-0.267183089	N
0.814285714	1.846911108	0.091756143	0.160982369	0.110842957	0.117179109	0.542	0.723	0.643	0.6392	0.006827492	0.880797078	0.98201379	0.952574127	0.077712068	-0.288200473	N
0.753303965	3.313616815	0.007791054	0.010463852	0.008733785	0.009061851	0.493	0.594	0.564	0.548333333	0	0.880797078	0.952574127	0.952574127	0.07830314	-0.475445148	N
0.714285714	9.290658159	0.010097825	0.014118998	0.012800512	0.012339112	0.385	0.449	0.435	0.423	0	0.952574127	0.952574127	0.952574127	0.049787068	-0.661991359	N
0.774193548	3.821121601	0.014285538	0.014678366	0.014473989	0.014479297	0.368	0.441	0.424	0.411	0	0.952574127	0.952574127	0.952574127	0.049787068	-0.661991359	N
0.752873563	1.344994832	0.034435206	0.040851451	0.03586874	0.037051799	0.4	0.514	0.439	0.451	0	0.880797078	0.98201379	0.880797078	0.096328735	-0.615449693	N
0.788381743	1.015842133	0.007984314	0.015831364	0.01198854	0.011939971	0.393	0.527	0.485	0.474333333	0	0.952574127	0.952574127	0.952574127	0.049787068	-0.44582518	N
0.820689655	1.79982605	0.009819478	0.043557862	0.01743968	0.016879016	0.322	0.598	0.4605	0.470777778	0	0.952574127	0.98201379	0.952574127	0.04454183	-0.286200505	N
0.85828877	1.99828802	0.013471605	0.018696043	0.01801117	0.016726273	0.178	0.194	0.18	0.184	0	0.952574127	0.952574127	0.952574127	0.049787068	-0.661991359	N
0.699300699	1.999246893	0.122149267	0.142497368	0.132723722	0.133707054	0.68	0.826	0.763	0.756444444	0.015371477	0.731058579	0.952574127	0.952574127	0.113646737	-0.326243001	N
0.845794393	2.549155287	0.010691561	0.021333967	0.013758939	0.014534586	0.358	0.63	0.4835	0.490366667	0	0.880797078	0.952574127	0.952574127	0.07830314	-0.257232328	N
0.768817204	1.340784577	0.011459703	1	0.130996598	0.15987232	0.322	1	0.6645	0.643111111	0.007877197	0.5	0.98201379	0.952574127	0.110911224	-0.177381239	N
0.74	3.641581769	0.007791054	0.010110063	0.008586406	0.008829175	0.493	0.594	0.58	0.555666667	0	0.880797078	0.952574127	0.952574127	0.07830314	-0.633475288	N
0.865030675	1.640880415	0.009843114	0.021451185	0.014640433	0.014516251	0.318	0.528	0.448	0.443666667	0.003699137	0.952574127	0.952574127	0.952574127	0.049787068	-0.29901583	N
0.704545455	3.388983433	0.008669266	0.01822635	0.013086065	0.013148068	0.314	0.542	0.428	0.438833333	0.006651885	0.880797078	0.952574127	0.952574127	0.085432158	-0.300590721	N
0.846153846	3.814886829	0.009121854	0.019290054	0.012074636	0.012754764	0.419	0.542	0.484	0.489777778	0	0.880797078	0.952574127	0.952574127	0.07830314	-0.396930195	N
0.757575758	3.853511873	0.009121854	0.019290054	0.012074636	0.012754764	0.419	0.542	0.484	0.489777778	0	0.880797078	0.952574127	0.952574127	0.07830314	-0.396930195	N
0.689119171	1.186652874	0.122149267	0.2373034	0.140993226	0.152132589	0.631	0.826	0.698	0.721266667	0.013194063	0.731058579	0.952574127	0.952574127	0.08810287	-0.274622775	N
0.623376623	3.412467058	0.010004032	0.017463316	0.015018251	0.014481421	0.366	0.613	0.505	0.505555556	0	0.880797078	0.952574127	0.952574127	0.07830314	-0.345253716	N
0.779026217	3.188700946	0.012015926	0.019290054	0.014410201	0.014406161	0.47	0.553	0.511	0.514444444	0	0.880797078	0.952574127	0.952574127	0.07830314	-0.371091955	N
0.670391061	4.486130222	0.006837653	0.058448686	0.011195768	0.018424584	0.16	0.834	0.4775	0.498833333	0	0.880797078	0.880797078	0.880797078	0.135335283	-0.504387751	N
0.542222222	3.593113494	0.004757832	0.016029682	0.010393757	0.010393757	0.296	0.41	0.353	0.353	0	0.880797078	0.880797078	0.880797078	0.135335283	-0.648498538	N
0.822115385	5.410398301	0.006837653	0.058448686	0.011195768	0.018424584	0.16	0.834	0.4775	0.498833333	0	0.880797078	0.880797078	0.880797078	0.135335283	-0.504387751	N
0.772727273	2.45373313	0.006652057	0.025853539	0.012897529	0.014575164	0.374	0.458	0.3905	0.40325	0	0.880797078	0.880797078	0.880797078	0.135335283	-0.529721921	N
0.705263158	2.73011027	0.013173721	0.013173721	0.013173721	0.013173721	0.41	0.41	0.41	0.41	0.125	0.880797078	0.880797078	0.880797078	0.135335283	-0.864664717	N
0.679069767	3.289679196	0.006227764	0.010623635	0.010259731	0.008767548	0.107	0.337	0.246	0.2486	0.055555556	0.880797078	0.952574127	0.880797078	0.11822564	-0.508178401	N
0.731132075	3.225457626	0.010665045	0.010816835	0.01074094	0.01074094	0.351	0.353	0.352	0.352	0	0.880797078	0.880797078	0.880797078	0.135335283	-0.706634577	N
0.777251185	2.972522925	0.008451248	0.01173709	0.010094169	0.010094169	0.448	0.519	0.4835	0.4835	0	0.880797078	0.880797078	0.880797078	0.135335283	-0.648498538	N
0.728070175	4.892074991	0.006772766	0.010347676	0.009186097	0.0088812	0.342	0.536	0.376	0.39525	0	0.880797078	0.880797078	0.880797078	0.135335283	-0.51180842	N
0.672413793	2.001406244	0.012075524	0.012075524	0.012075524	0.012075524	0.102	0.102	0.102	0.102	0.25	0.952574127	0.952574127	0.952574127	0.049787068	-0.950212932	N
0.75	3.389872335	0.008360044	0.010932865	0.009646455	0.009646455	0.134	0.533	0.3335	0.3335	0	0.880797078	0.880797078	0.880797078	0.135335283	-0.648498538	N
0.796703297	4.013724847	0.011309646	0.012152169	0.011730907	0.011730907	0.147	0.393	0.27	0.27	0	0.880797078	0.880797078	0.880797078	0.135335283	-0.706634577	N
0.779279279	2.894646813	0.012449064	0.012449064	0.012449064	0.012449064	0.378	0.378	0.378	0.378	0	0.880797078	0.880797078	0.880797078	0.135335283	-0.864664717	N
0.787610619	3.762210988	0.008988342	0.008988342	0.008988342	0.008988342	0.371	0.371	0.371	0.371	0	0.880797078	0.880797078	0.880797078	0.135335283	-0.864664717	N
0.994413408	2.84513253	0.006653295	0.008451248	0.007552271	0.007552271	0.42	0.519	0.4695	0.4695	0	0.880797078	0.880797078	0.880797078	0.135335283	-0.706634577	N
0.818627451	3.667083431	0.008170178	0.008170178	0.008170178	0.008170178	0.473	0.473	0.473	0.473	0	0.731058579	0.731058579	0.731058579	0.367879441	-0.632120559	N
0.721153846	3.891034447	0.013937367	0.013937367	0.013937367	0.013937367	0.109	0.109	0.109	0.109	0.25	0.880797078	0.880797078	0.880797078	0.135335283	-0.864664717	N
0.743718593	3.745234551	0.008170178	0.058448686	0.033309432	0.033309432	0.473	0.834	0.6535	0.6535	0	0.731058579	0.880797078	0.817574476	0.251607362	-0.532226459	N
0.6816609	2.792104093	0.007239893	0.011470409	0.009779119	0.009657844	0.044	1	0.36	0.3656	0.025	0.880797078	0.880797078	0.880797078	0.135335283	-0.493526667	N
0.67357513	3.157354401	0.009265421	0.046030681	0.027648051	0.027648051	0.359	0.733	0.546	0.546	0	0.731058579	0.880797078	0.817574476	0.251607362	-0.532226459	N
0.625592417	0	0.007007291	1	0.017754296	0.219121882	0.342	1	0.63	0.643	0.05	0.5	0.880797078	0.880797078	0.308268227	-0.342443958	N
0.721052632	1.822421661	0.007109489	0.007109489	0.007109489	0.007109489	0.314	0.314	0.314	0.314	0	0.880797078	0.880797078	0.880797078	0.135335283	-0.864664717	N
0.687203791	4.901024462	0.00745447	0.073751164	0.009294774	0.022010291	0.338	0.811	0.531	0.5732	0	0.731058579	0.880797078	0.880797078	0.181844115	-0.455180355	N
0.603375527	4.223161264	0.010734353	0.010734353	0.010734353	0.010734353	0.21	0.21	0.21	0.21	0	0.880797078	0.880797078	0.880797078	0.135335283	-0.864664717	N
0.76300578	5.528879835	0.058448686	0.058448686	0.058448686	0.058448686	0.834	0.834	0.834	0.834	0	0.880797078	0.880797078	0.880797078	0.135335283	-0.864664717	N
0.710784314	2.033539524	0.058448686	0.058448686	0.058448686	0.058448686	0.834	0.834	0.834	0.834	0	0.880797078	0.880797078	0.880797078	0.135335283	-0.864664717	N
0.691542289	3.9783953	0.005164193	0.013937367	0.010785186	0.010809077	0.046	1	0.346	0.330375	0.032828283	0.880797078	0.952574127	0.880797078	0.11394823	-0.452911222	N
0.843601896	3.821842934	0.006470569	0.006470569	0.006470569	0.006470569	0.053	0.053	0.053	0.053	0	0.952574127	0.952574127	0.952574127	0.049787068	-0.950212932	N
0.824742268	2.791131816	0.007109489	0.007109489	0.007109489	0.007109489	0.314	0.314	0.314	0.314	0	0.880797078	0.880797078	0.880797078	0.135335283	-0.864664717	N
0.730088496	2.798323937	0.00968922	0.00968922	0.00968922	0.00968922	0.336	0.336	0.336	0.336	0.052631579	0.880797078	0.880797078	0.880797078	0.135335283	-0.864664717	N
0.647058824	5.002220837	0.006024428	0.006024428	0.006024428	0.006024428	0.474	0.474	0.474	0.474	0	0.880797078	0.880797078	0.880797078	0.135335283	-0.864664717	N
0.629787234	3.350727172	0.00781775	0.009237704	0.008527727	0.008527727	0.307	0.338	0.3225	0.3225	0	0.880797078	0.880797078	0.880797078	0.135335283	-0.627111484	N
0.694300518	3.238609579	0.007957924	0.014008335	0.010486897	0.010810314	0.109	0.457	0.362	0.341	0.04519774	0.880797078	0.952574127	0.880797078	0.112003952	-0.469948829	N
0.747863248	4.395609153	0.009973863	0.013880858	0.011723107	0.011825234	0.203	0.373	0.3265	0.30725	0	0.880797078	0.952574127	0.952574127	0.071174122	-0.593883082	N
0.756	3.071702022	0.010279092	0.080026247	0.051373894	0.055003011	0.07	0.869	0.792	0.697428571	0	0.731058579	0.880797078	0.880797078	0.234997065	-0.435398652	N
0.639830508	5.979996387	0.008170178	0.008375143	0.008272661	0.008272661	0.428	0.473	0.4505	0.4505	0	0.731058579	0.880797078	0.817574476	0.251607362	-0.590362498	N
0.702702703	3.538201977	0.009990509	0.012847813	0.01071901	0.011078754	0.117	0.457	0.36	0.33275	0.027607362	0.880797078	0.952574127	0.880797078	0.096449731	-0.499118991	N
0.691449814	3.773295683	0.098411451	0.098411451	0.098411451	0.098411451	0.813	0.813	0.813	0.813	0	0.880797078	0.880797078	0.880797078	0.135335283	-0.864664717	N
0.670634921	1.38813815	0.011457618	0.014326796	0.013065969	0.012950128	0.336	0.362	0.336	0.344666667	0.214285714	0.880797078	0.880797078	0.880797078	0.135335283	-0.628119624	N
0.861244019	3.531918728	0.011309646	0.012152169	0.011730907	0.011730907	0.147	0.393	0.27	0.27	0	0.880797078	0.880797078	0.880797078	0.135335283	-0.706634577	N
0.698113208	0.423154351	1	1	1	1	1	1	1	1	0.5	0.5	0.5	0.5	1	0	N
0.772727273	2.648523179	0.009457134	0.049544036	0.009954639	0.017733908	0.066	0.806	0.077	0.2216	0	0.880797078	0.952574127	0.92414182	0.092561176	-0.669885591	N
0.644688645	1.528925264	0.011457618	0.014326796	0.013065969	0.012950128	0.336	0.362	0.336	0.344666667	0.214285714	0.880797078	0.880797078	0.880797078	0.135335283	-0.628119624	N
0.815275311	3.132228848	0.007957924	0.02144891	0.010668398	0.011805707	0.316	0.86	0.378	0.5025	0.008	0.731058579	0.952574127	0.880797078	0.133326909	-0.454368943	N
0.706976744	2.432762874	0.007109489	0.012065713	0.010128316	0.009925329	0.314	0.353	0.332	0.3314	0.020833333	0.880797078	0.952574127	0.880797078	0.101115997	-0.529064616	N
0.621621622	1.655676146	0.011457618	0.016853912	0.014326796	0.014212775	0.336	0.382	0.362	0.36	0.181818182	0.880797078	0.880797078	0.880797078	0.135335283	-0.602281384	N
0.667910448	2.88466339	0.006696473	0.049544036	0.013089683	0.019819902	0.147	0.806	0.3815	0.4415	0	0.731058579	0.952574127	0.880797078	0.141480056	-0.449400115	N
0.803191489	1.397704946	0.007619534	0.098411451	0.013065969	0.024049529	0.09	0.832	0.362	0.453571429	0.027777778	0.731058579	0.952574127	0.880797078	0.156334704	-0.47211101	N
0.656410256	0.454727206	0.012399139	1	0.506199569	0.506199569	0.409	1	0.7045	0.7045	0.5	0.5	0.880797078	0.731058579	0.567667642	-0.216166179	N
0.787401575	2.88367378	0.006043342	0.014424744	0.007055011	0.008908351	0	0	0	0	0	0.731058579	0.952574127	0.92414182	0.131318535	-0.482892693	N
0.601851852	3.522393694	0.008578794	0.011724235	0.010151514	0.010151514	0.035	0.612	0.3235	0.3235	0	0.880797078	0.880797078	0.880797078	0.135335283	-0.648498538	N
0.8	3.147772663	0.010586439	0.014025479	0.012916404	0.012509441	0.33	0.418	0.355	0.367666667	0	0.880797078	0.952574127	0.880797078	0.106819212	-0.585948502	N
0.739316239	4.459458517	0.010685908	0.015667772	0.012594078	0.012885459	0	0	0	0	0	0.880797078	0.880797078	0.880797078	0.135335283	-0.648498538	N
0.685446009	4.228199044	0.009669836	0.017234674	0.013851532	0.013585347	0.128	0.363	0.349	0.28	0	0.880797078	0.880797078	0.880797078	0.135335283	-0.576443145	N
0.730923695	3.619684738	0.00806151	0.010149129	0.009954639	0.009388426	0.066	0.371	0.077	0.171333333	0	0.880797078	0.880797078	0.880797078	0.135335283	-0.864664717	N
0.643192488	3.193636634	0.005787155	0.009472635	0.007302704	0.007428704	0.088	0.386	0.2705	0.256375	0	0.880797078	0.952574127	0.880797078	0.103254703	-0.506516076	N
0.672131148	2.213271383	0.007055011	0.012605709	0.010883774	0.010373544	0.037	0.439	0.36	0.323571429	0.047619048	0.880797078	0.952574127	0.92414182	0.092561176	-0.548199282	N
0.624161074	2.773893043	0.007461127	0.009069203	0.008947236	0.008492522	0.384	0.567	0.443	0.464666667	0	0.880797078	0.880797078	0.880797078	0.135335283	-0.653957864	N
0.621848739	3.687321697	0.008749915	0.012126993	0.010958422	0.010611776	0.053	0.329	0.087	0.156333333	0.125	0.880797078	0.952574127	0.92414182	0.092561176	-0.669885591	N
0.798634812	2.431610863	0.008451248	0.008451248	0.008451248	0.008451248	0.519	0.519	0.519	0.519	0	0.880797078	0.880797078	0.880797078	0.135335283	-0.864664717	N
0.852459016	3.337656765	0.008578794	0.009127359	0.008853076	0.008853076	0.035	0.811	0.423	0.423	0	0.880797078	0.880797078	0.880797078	0.135335283	-0.648498538	N
0.697761194	3.286750035	0.010486897	0.012605709	0.010951122	0.011347909	0.36	0.367	0.36	0.362333333	0.053571429	0.952574127	0.952574127	0.952574127	0.049787068	-0.713667839	N
0.658536585	3.528523977	0.00806151	0.024053692	0.010378354	0.011878149	0.106	0.449	0.371	0.329285714	0.133333333	0.880797078	0.98201379	0.880797078	0.094175844	-0.512721126	N
0.793522267	4.004090064	0.007299685	0.009858241	0.00881255	0.008656826	0.206	0.389	0.358	0.317666667	0	0.880797078	0.952574127	0.880797078	0.106819212	-0.572946319	N
0.64	1.911951324	0.010856266	0.10769925	0.017403721	0.045167747	0.317	0.834	0.6415	0.620166667	0.020408163	0.880797078	0.880797078	0.880797078	0.135335283	-0.521256739	N
0.804979253	3.585585148	0.00806151	0.013539694	0.010800602	0.010800602	0.282	0.371	0.3265	0.3265	0.5	0.880797078	0.952574127	0.92414182	0.092561176	-0.669885591	N
0.688118812	3.216428163	0.010311374	0.015922832	0.01117938	0.011755505	0.352	0.571	0.369	0.40225	0.026415094	0.880797078	0.952574127	0.92414182	0.092561176	-0.5280183	N
0.735955056	2.529097227	0.005778111	0.241147477	0.00923872	0.028604809	0.044	0.814	0.335	0.324230769	0	0.731058579	0.952574127	0.880797078	0.14478878	-0.431074899	N
0.698492462	2.93333512	0.008136356	0.019528337	0.018497977	0.015387556	0.333	0.359	0.359	0.350333333	0	0.880797078	0.952574127	0.880797078	0.106819212	-0.585948502	N
0.815315315	4.302658002	0.010259731	0.010259731	0.010259731	0.010259731	0.216	0.216	0.216	0.216	0.142857143	0.880797078	0.880797078	0.880797078	0.135335283	-0.864664717	N
0.813953488	2.39054635	0.010734353	0.015775227	0.01096718	0.012492253	0.068	0.36	0.21	0.212666667	0	0.880797078	0.880797078	0.880797078	0.135335283	-0.576443145	N
0.92039801	1.581865451	0.011457618	0.014326796	0.013065969	0.012950128	0.336	0.362	0.336	0.344666667	0.214285714	0.880797078	0.880797078	0.880797078	0.135335283	-0.628119624	N
0.726851852	10.1977433	0.010400061	0.011440251	0.010920156	0.010920156	0.128	0.246	0.187	0.187	0.2	0.880797078	0.880797078	0.880797078	0.135335283	-0.864664717	N
0.633187773	2.624551244	0.060039855	0.060039855	0.060039855	0.060039855	0.77	0.77	0.77	0.77	0	0.880797078	0.880797078	0.880797078	0.135335283	-0.864664717	N
0.785388128	1.154664142	0.011457618	0.014326796	0.013065969	0.012950128	0.336	0.362	0.336	0.344666667	0.214285714	0.880797078	0.880797078	0.880797078	0.135335283	-0.628119624	N
0.745614035	3.098412009	0.011552296	0.011552296	0.011552296	0.011552296	0.203	0.203	0.203	0.203	0	0.952574127	0.952574127	0.952574127	0.049787068	-0.950212932	N
0.714932127	3.350638191	0.008310413	0.009880131	0.00961355	0.009354411	0.067	0.326	0.204	0.20025	0	0.952574127	0.98201379	0.952574127	0.039296592	-0.636972113	N
0.771014493	3.523962721	0.008671365	0.011534045	0.009361787	0.009855732	0.343	0.716	0.358	0.472333333	0	0.880797078	0.880797078	0.880797078	0.135335283	-0.628119624	N
0.651933702	2.981338394	0.010430529	0.012847813	0.011927943	0.011735428	0.355	0.38	0.371	0.368666667	0.045454545	0.880797078	0.880797078	0.880797078	0.135335283	-0.592776027	N
0.668016194	3.270359112	0.007052908	0.014326796	0.012261793	0.011475823	0.316	0.362	0.336	0.3375	0.166666667	0.880797078	0.880797078	0.880797078	0.135335283	-0.569483468	N
0.710084034	2.936577536	0.007052908	0.007052908	0.007052908	0.007052908	0.316	0.316	0.316	0.316	0	0.880797078	0.880797078	0.880797078	0.135335283	-0.864664717	N
0.703703704	0.483298245	1	1	1	1	1	1	1	1	0.5	0.5	0.5	0.5	1	0	N
0.82	3.389209075	0.008578794	0.014025479	0.011302136	0.011302136	0.035	0.197	0.116	0.116	0	0.880797078	0.880797078	0.880797078	0.135335283	-0.627111484	N
0.658119658	1.940375792	0.007109489	0.010183162	0.008646325	0.008646325	0.314	0.367	0.3405	0.3405	0	0.880797078	0.952574127	0.92414182	0.092561176	-0.691272645	N
0.670157068	4.479418414	0.012371205	0.012371205	0.012371205	0.012371205	0.358	0.358	0.358	0.358	0.066666667	0.880797078	0.880797078	0.880797078	0.135335283	-0.864664717	N
0.683982684	3.612356256	0.007957924	0.013680921	0.010460259	0.010660615	0.089	0.36	0.333	0.2985	0.048387097	0.880797078	0.952574127	0.952574127	0.084006354	-0.557639097	N
0.633484163	2.797081855	0.009982093	0.014008335	0.010817963	0.011243628	0.109	0.383	0.354	0.323263158	0.02422611	0.880797078	0.952574127	0.880797078	0.108320057	-0.45500473	N
0.816326531	5.630186783	0.010997911	0.011968786	0.011483349	0.011483349	0.328	0.338	0.333	0.333	0.125	0.880797078	0.98201379	0.952574127	0.076825461	-0.677753449	N
0.786561265	3.777264842	0.012371205	0.013366326	0.012868765	0.012868765	0.358	0.798	0.578	0.578	0.014084507	0.731058579	0.880797078	0.817574476	0.251607362	-0.532226459	N
0.587234043	4.481597865	0.007031668	0.012910575	0.008731423	0.008999931	0.323	0.442	0.379	0.3808	0	0.731058579	0.880797078	0.880797078	0.158589699	-0.461612945	N
0.662162162	2.040093	0.013851532	0.015907422	0.014433961	0.014730971	0.349	0.397	0.375	0.373666667	0	0.880797078	0.880797078	0.880797078	0.135335283	-0.602281384	N
0.68907563	1.641439131	0.010734353	0.010734353	0.010734353	0.010734353	0.229	0.229	0.229	0.229	0	0.880797078	0.880797078	0.880797078	0.135335283	-0.864664717	N
0.638686131	3.646973861	0.008749915	0.012644054	0.010696984	0.010696984	0.053	0.332	0.1925	0.1925	0	0.952574127	0.952574127	0.952574127	0.049787068	-0.704791841	N
0.633027523	3.376758345	0.009990509	0.018027382	0.010433621	0.012817171	0.138	0.438	0.333	0.303	0	0.880797078	0.880797078	0.880797078	0.135335283	-0.648498538	N
0.654867257	1.967728197	0.009711586	0.143735105	0.014856677	0.04814467	0.069	0.834	0.576	0.576111111	0.016393443	0.731058579	0.880797078	0.880797078	0.168555877	-0.474619081	N
0.724907063	0.469525407	0.010604567	1	0.012064922	0.258683603	0	0	0	0	0.090909091	0.5	0.880797078	0.880797078	0.423556855	-0.278716215	N
0.617647059	1.985149237	0.098411451	0.098411451	0.098411451	0.098411451	0.813	0.813	0.813	0.813	0	0.880797078	0.880797078	0.880797078	0.135335283	-0.864664717	N
0.802884615	2.514803816	0.008749915	0.012644054	0.011881975	0.01128948	0.053	0.344	0.3305	0.2645	0	0.880797078	0.952574127	0.952574127	0.071174122	-0.575875828	N
0.760180995	1.393920413	0.010430529	0.011927943	0.011179236	0.011179236	0.371	0.38	0.3755	0.3755	0.057142857	0.880797078	0.880797078	0.880797078	0.135335283	-0.648498538	N
0.69	3.504690043	0.009982093	0.011316089	0.010455255	0.010610311	0.332	0.377	0.354	0.3506	0.060240964	0.880797078	0.952574127	0.880797078	0.11822564	-0.525642687	N
0.804444444	2.047478749	0.005416669	0.241147477	0.0106217	0.033184588	0.041	0.814	0.335	0.3971	0	0.731058579	0.952574127	0.880797078	0.141480056	-0.44405612	N
0.693333333	1.597472534	0.007109489	0.012065713	0.009587601	0.009587601	0.314	0.343	0.3285	0.3285	0.090909091	0.880797078	0.952574127	0.92414182	0.092561176	-0.669885591	N
0.8125	3.430541987	0.006803362	0.060039855	0.016597373	0.028889228	0.094	0.77	0.392	0.4208	0	0.731058579	0.880797078	0.880797078	0.181844115	-0.481591765	N
0.620155039	3.643545663	0.007575318	0.009169393	0.008372356	0.008372356	0.371	1	0.6855	0.6855	0	0.880797078	0.880797078	0.880797078	0.135335283	-0.648498538	N
0.825641026	3.084346985	0.009453883	0.013651528	0.011086662	0.011271569	0.059	1	0.317	0.384	0.09375	0.880797078	0.880797078	0.880797078	0.135335283	-0.524375158	N
0.429223744	3.859240757	0.007809114	0.007809114	0.007809114	0.007809114	0.268	0.268	0.268	0.268	0	0.880797078	0.880797078	0.880797078	0.135335283	-0.864664717	N
0.762376238	3.445950869	0.011407638	0.011407638	0.011407638	0.011407638	0.457	0.457	0.457	0.457	0.333333333	0.880797078	0.880797078	0.880797078	0.135335283	-0.864664717	N
0.684931507	2.151630878	0.00632655	0.014326796	0.010948675	0.010576863	0.305	1	0.3365	0.394928571	0.046413502	0.880797078	0.952574127	0.880797078	0.110892936	-0.466714612	N
0.668367347	3.683142397	0.009127359	0.010673075	0.009900217	0.009900217	0.437	0.811	0.624	0.624	0	0.880797078	0.880797078	0.880797078	0.135335283	-0.648498538	N
0.733944954	2.832947495	0.009036665	0.013652103	0.011755639	0.011443959	0.445	0.611	0.531	0.5242	0	0.731058579	0.880797078	0.731058579	0.274861778	-0.407177634	N
0.7890625	1.962472569	0.010734353	0.010734353	0.010734353	0.010734353	0.21	0.21	0.21	0.21	0	0.880797078	0.880797078	0.880797078	0.135335283	-0.864664717	N
0.755319149	2.623785713	0.008973828	0.00903904	0.009006434	0.009006434	0.51	0.539	0.5245	0.5245	0	0.731058579	0.880797078	0.817574476	0.251607362	-0.590362498	N
0.697115385	3.091409523	0.008360044	0.010932865	0.009646455	0.009646455	0.134	0.533	0.3335	0.3335	0	0.880797078	0.880797078	0.880797078	0.135335283	-0.648498538	N
0.486111111	3.234006783	0.006470569	0.021103443	0.011268277	0.01236447	0.053	0.435	0.308	0.257538462	0.026455026	0.731058579	0.952574127	0.952574127	0.107158872	-0.464907927	N
0.625	1.669418294	0.010268197	0.013178367	0.01107557	0.011399426	0.102	0.354	0.102	0.165	0.078431373	0.880797078	0.952574127	0.952574127	0.071174122	-0.597723565	N
0.740932642	2.854581557	0.010093678	0.021103443	0.010455255	0.013884126	0.332	0.435	0.377	0.381333333	0.020833333	0.731058579	0.880797078	0.880797078	0.212850003	-0.524766665	N
0.631178707	2.183133594	0.009769091	0.009769091	0.009769091	0.009769091	0.466	0.466	0.466	0.466	0	0.880797078	0.880797078	0.880797078	0.135335283	-0.864664717	N
0.666666667	3.544516249	0.007108374	0.01476796	0.010191939	0.010454974	0.088	1	0.402	0.489071429	0.024	0.731058579	0.952574127	0.880797078	0.145834993	-0.435836494	N
0.747787611	1.240002366	0.007109489	0.016321229	0.011715359	0.011715359	0.314	0.397	0.3555	0.3555	0	0.880797078	0.952574127	0.92414182	0.092561176	-0.669885591	N
0.709803922	2.562948366	0.009457134	0.012121212	0.009880131	0.010664739	0.082	0.364	0.326	0.2908	0	0.880797078	0.952574127	0.952574127	0.07830314	-0.604959216	N
0.770833333	3.539430544	0.008527111	0.016029682	0.010227286	0.011252841	0.092	0.296	0.2225	0.20825	0	0.880797078	0.880797078	0.880797078	0.135335283	-0.554949458	N
0.666666667	1.622994668	0.011457618	0.01670801	0.013696383	0.013889598	0.336	0.362	0.341	0.345	0.157894737	0.880797078	0.880797078	0.880797078	0.135335283	-0.558789941	N
0.788104089	1.132490866	0.009294774	0.009294774	0.009294774	0.009294774	0.399	0.399	0.399	0.399	0	0.880797078	0.880797078	0.880797078	0.135335283	-0.864664717	N
0.732673267	2.881185327	0.009826927	0.015312021	0.011897077	0.012233275	0.393	1	0.4375	0.567	0	0.880797078	0.880797078	0.880797078	0.135335283	-0.529721921	N
0.785714286	2.29041701	0.005778111	0.012940944	0.006683396	0.007734532	0.044	0.343	0.325	0.250428571	0	0.880797078	0.952574127	0.880797078	0.110892936	-0.488675538	N
0.577889447	6.072681636	0.012371205	0.046030681	0.029200943	0.029200943	0.358	0.733	0.5455	0.5455	0.043478261	0.731058579	0.880797078	0.817574476	0.251607362	-0.532226459	N
0.879396985	4.486395951	0.014174548	0.014174548	0.014174548	0.014174548	0.357	0.357	0.357	0.357	0	0.952574127	0.952574127	0.952574127	0.049787068	-0.950212932	N
0.855123675	3.445587261	0.013937367	0.073751164	0.014669541	0.034119357	0.108	0.787	0.109	0.334666667	0.285714286	0.880797078	0.952574127	0.880797078	0.106819212	-0.585948502	N
0.712871287	3.005927247	0.016029682	0.016029682	0.016029682	0.016029682	0.296	0.296	0.296	0.296	0	0.880797078	0.880797078	0.880797078	0.135335283	-0.864664717	N
0.644067797	4.336611932	0.011457618	0.014326796	0.012892207	0.012892207	0.336	0.362	0.349	0.349	0.222222222	0.880797078	0.880797078	0.880797078	0.135335283	-0.706634577	N
0.627376426	3.87100101	0.008262629	0.008475784	0.008369207	0.008369207	0.349	0.404	0.3765	0.3765	0	0.880797078	0.952574127	0.92414182	0.092561176	-0.691272645	N
0.764925373	2.607209462	0.00745447	0.008246785	0.007850627	0.007850627	0.338	0.382	0.36	0.36	0	0.880797078	0.880797078	0.880797078	0.135335283	-0.648498538	N
0.756637168	5.045841725	0.007315423	0.010347676	0.008436635	0.008621039	0.354	0.442	0.379	0.3935	0	0.880797078	0.880797078	0.880797078	0.135335283	-0.523766431	N
0.725118483	2.782969376	0.011403152	0.011403152	0.011403152	0.011403152	0.332	0.332	0.332	0.332	0	0.952574127	0.952574127	0.952574127	0.049787068	-0.950212932	N
0.67804878	2.121454107	0.005164193	0.012644054	0.010259731	0.009467109	0.046	0.357	0.329	0.239	0.022727273	0.880797078	0.952574127	0.880797078	0.097313854	-0.486208198	N
0.798165138	2.100963331	0.009529376	0.080026247	0.014786022	0.033425546	0.148	0.869	0.363	0.473333333	0	0.731058579	0.952574127	0.880797078	0.170437686	-0.41899802	N
0.787401575	2.888014972	0.010486897	0.012605709	0.010951122	0.011347909	0.36	0.367	0.36	0.362333333	0.053571429	0.952574127	0.952574127	0.952574127	0.049787068	-0.713667839	N
0.793269231	4.206746596	0.012371205	0.012371205	0.012371205	0.012371205	0.358	0.358	0.358	0.358	0.066666667	0.880797078	0.880797078	0.880797078	0.135335283	-0.864664717	N
0.64573991	1.493429784	0.010430529	0.011927943	0.011179236	0.011179236	0.371	0.38	0.3755	0.3755	0.057142857	0.880797078	0.880797078	0.880797078	0.135335283	-0.648498538	N
0.757746479	3.904160466	0.021662527	0.021662527	0.021662527	0.021662527	0.444	0.444	0.444	0.444	0	0.880797078	0.880797078	0.880797078	0.135335283	-0.864664717	N
0.509090909	4.722589938	0.012965395	0.098411451	0.055688423	0.055688423	0.487	0.813	0.65	0.65	0	0.880797078	0.952574127	0.92414182	0.092561176	-0.691272645	N
0.72246696	3.20805602	0.011248654	0.011407638	0.011328146	0.011328146	0.361	0.457	0.409	0.409	0.090909091	0.880797078	0.880797078	0.880797078	0.135335283	-0.619243626	N
0.701923077	2.249136223	0.010430529	0.011927943	0.011179236	0.011179236	0.371	0.38	0.3755	0.3755	0.057142857	0.880797078	0.880797078	0.880797078	0.135335283	-0.648498538	N
0.635964912	3.565579854	0.012371205	0.012371205	0.012371205	0.012371205	0.358	0.358	0.358	0.358	0.066666667	0.880797078	0.880797078	0.880797078	0.135335283	-0.864664717	N
0.807531381	2.983624543	0.010430529	0.016074584	0.011927943	0.012397337	0.347	0.38	0.362	0.363	0.049019608	0.880797078	0.952574127	0.880797078	0.11822564	-0.532721577	N
0.829596413	2.757039614	0.007109489	0.007109489	0.007109489	0.007109489	0.314	0.314	0.314	0.314	0	0.880797078	0.880797078	0.880797078	0.135335283	-0.864664717	N
0.660287081	2.207179305	0.011457618	0.014326796	0.013065969	0.012950128	0.336	0.362	0.336	0.344666667	0.214285714	0.880797078	0.880797078	0.880797078	0.135335283	-0.628119624	N
0.620689655	3.560481816	0.00806151	0.221875183	0.034568159	0.063780287	0.216	0.834	0.579	0.540166667	0	0.731058579	0.880797078	0.880797078	0.181844115	-0.46886807	N
0.639423077	2.368626337	0.013680921	0.013680921	0.013680921	0.013680921	0.089	0.089	0.089	0.089	0.5	1	0				N
0.665137615	1.220210435	0.009294774	0.009294774	0.009294774	0.009294774	0.399	0.399	0.399	0.399	0	0.880797078	0.880797078	0.880797078	0.135335283	-0.864664717	N
0.70718232	9.192390996	0.011062296	0.011303419	0.01128827	0.011217995	0.272	0.387	0.347	0.335333333	0.107142857	0.880797078	0.952574127	0.952574127	0.07830314	-0.633475288	N
0.636363636	4.69965635	0.010710448	0.010710448	0.010710448	0.010710448	0.387	0.387	0.387	0.387	0	0.880797078	0.880797078	0.880797078	0.135335283	-0.864664717	N
0.816037736	3.258025907	0.008386783	0.008386783	0.008386783	0.008386783	0.523	0.523	0.523	0.523	0	0.880797078	0.880797078	0.880797078	0.135335283	-0.864664717	N
0.687763713	5.564143333	0.010665045	0.010665045	0.010665045	0.010665045	0.351	0.351	0.351	0.351	0	0.880797078	0.880797078	0.880797078	0.135335283	-0.864664717	N
0.751677852	2.811026055	0.00886066	0.00886066	0.00886066	0.00886066	0.044	0.044	0.044	0.044	0	0.880797078	0.880797078	0.880797078	0.135335283	-0.864664717	N
0.575289575	3.082099311	0.007031668	0.010347676	0.007796998	0.008248159	0.323	0.442	0.3735	0.382375	0	0.880797078	0.880797078	0.880797078	0.135335283	-0.500907913	N
0.904522613	3.657765915	0.007093018	0.014294155	0.008170178	0.00935807	0.331	0.473	0.387	0.3964	0	0.731058579	0.880797078	0.880797078	0.181844115	-0.490893531	N
0.776859504	1.995444309	0.008451248	0.008451248	0.008451248	0.008451248	0.519	0.519	0.519	0.519	0	0.880797078	0.880797078	0.880797078	0.135335283	-0.864664717	N
0.598130841	1.97956711	0.010489713	0.014008335	0.011032586	0.011523375	0.249	0.319	0.308	0.2978	0.040650407	0.880797078	0.952574127	0.952574127	0.084006354	-0.570127759	N
0.839449541	2.403521152	0.008988342	0.020230189	0.013688646	0.014302392	0.371	0.401	0.386	0.386	0	0.880797078	0.880797078	0.880797078	0.135335283	-0.648498538	N
0.821052632	0.98368074	0.00745447	0.010423687	0.008246785	0.008708314	0.338	0.531	0.382	0.417	0	0.731058579	0.880797078	0.880797078	0.212850003	-0.498928425	N
0.802371542	3.325004583	0.008578794	0.008578794	0.008578794	0.008578794	0.035	0.035	0.035	0.035	0	0.880797078	0.880797078	0.880797078	0.135335283	-0.864664717	N
0.82464455	4.239330212	0.010734353	0.010734353	0.010734353	0.010734353	0.229	0.229	0.229	0.229	0	0.880797078	0.880797078	0.880797078	0.135335283	-0.864664717	N
0.741573034	3.423867301	0.013937367	0.013937367	0.013937367	0.013937367	0.109	0.109	0.109	0.109	0.25	0.880797078	0.880797078	0.880797078	0.135335283	-0.864664717	N
0.606965174	2.687854105	0.010705814	0.016074584	0.014556036	0.013973118	0.204	0.362	0.2755	0.27925	0.061538462	0.880797078	0.952574127	0.92414182	0.092561176	-0.60878433	N
0.698689956	1.41071418	0.009812397	1	0.036311617	0.182448336	0.144	1	0.641	0.5674	0.03125	0.5	0.952574127	0.880797078	0.254569549	-0.346539137	N
0.82278481	4.34747496	0.008532878	0.010940338	0.009722488	0.009729548	0.34	0.37	0.361	0.358	0	0.880797078	0.880797078	0.880797078	0.135335283	-0.627619507	N
0.709163347	3.381868813	0.005778111	0.012605709	0.00806151	0.008201439	0.231	0.375	0.36	0.344818182	0.00887574	0.880797078	0.952574127	0.880797078	0.096449731	-0.488131913	N
0.758333333	2.651481124	0.008451248	0.008451248	0.008451248	0.008451248	0.519	0.519	0.519	0.519	0	0.880797078	0.880797078	0.880797078	0.135335283	-0.864664717	N
0.846153846	3.2026892	0.010010213	0.016074584	0.01117938	0.011953363	0.204	0.457	0.3635	0.349428571	0.030905077	0.880797078	0.952574127	0.92414182	0.092561176	-0.47941947	N
0.691964286	3.697399028	0.011034745	0.012152169	0.011309646	0.011498853	0.147	0.393	0.351	0.297	0	0.880797078	0.952574127	0.880797078	0.106819212	-0.611786741	N
0.74	3.573492509	0.010259731	0.010259731	0.010259731	0.010259731	0.216	0.216	0.216	0.216	0.142857143	0.880797078	0.880797078	0.880797078	0.135335283	-0.864664717	N
0.644329897	2.404374043	0.010430529	0.012847813	0.011927943	0.011735428	0.355	0.38	0.371	0.368666667	0.045454545	0.880797078	0.880797078	0.880797078	0.135335283	-0.592776027	N
0.795698925	1.985865619	0.013065969	0.016853912	0.014326796	0.014748893	0.336	0.382	0.362	0.36	0.222222222	0.880797078	0.880797078	0.880797078	0.135335283	-0.576443145	N
0.787128713	3.314050176	0.010489713	0.014008335	0.010925275	0.011587149	0.249	0.319	0.3065	0.29525	0.050632911	0.880797078	0.952574127	0.92414182	0.092561176	-0.583189555	N
0.786821705	3.072116656	0.010093678	0.013937367	0.010947267	0.011481395	0.109	0.457	0.3685	0.32575	0.108108108	0.880797078	0.952574127	0.880797078	0.11394823	-0.551108975	N
0.683035714	6.115717425	0.008988342	0.008988342	0.008988342	0.008988342	0.371	0.371	0.371	0.371	0	0.880797078	0.880797078	0.880797078	0.135335283	-0.864664717	N
0.714893617	3.802774146	0.011923186	0.011923186	0.011923186	0.011923186	0.328	0.328	0.328	0.328	0	0.952574127	0.952574127	0.952574127	0.049787068	-0.950212932	N
0.699186992	2.671554903	0.003769827	0.006470569	0.004488528	0.004909641	0.053	0.416	0.314	0.261	0	0.880797078	0.952574127	0.880797078	0.106819212	-0.621292099	N
0.63740458	2.781540646	0.007055011	0.007055011	0.007055011	0.007055011	0.439	0.439	0.439	0.439	0	0.880797078	0.880797078	0.880797078	0.135335283	-0.864664717	N
0.618421053	2.335883143	0.00845632	0.013289921	0.010564608	0.010577271	0.105	0.323	0.1945	0.2078	0.027472527	0.880797078	0.952574127	0.880797078	0.109670819	-0.472266107	N
0.885714286	2.529242924	0.006066394	0.006066394	0.006066394	0.006066394	0.259	0.259	0.259	0.259	0	0.952574127	0.952574127	0.952574127	0.049787068	-0.950212932	N
0.676	3.042153987	0.007521495	0.046030681	0.026776088	0.026776088	0.234	0.733	0.4835	0.4835	0	0.731058579	0.952574127	0.880797078	0.208833255	-0.553613512	N
0.730232558	2.669581521	0.011727705	0.013877773	0.012758019	0.012611659	0.357	0.611	0.409	0.4304	0.078431373	0.731058579	0.952574127	0.880797078	0.147624829	-0.496243499	N
0.755813953	3.28662769	0.008851601	0.011148879	0.010579894	0.010193458	0.354	0.39	0.356	0.366666667	0	0.731058579	0.880797078	0.731058579	0.290364722	-0.473090185	N
0.697674419	4.689139083	0.008973828	0.010536937	0.009755383	0.009755383	0.456	0.51	0.483	0.483	0	0.731058579	0.880797078	0.817574476	0.251607362	-0.532226459	N
0.694835681	2.615760887	0.009294774	0.009294774	0.009294774	0.009294774	0.399	0.399	0.399	0.399	0	0.880797078	0.880797078	0.880797078	0.135335283	-0.864664717	N
0.643902439	3.781723604	0.014501047	0.058448686	0.036474866	0.036474866	0.356	0.834	0.595	0.595	0	0.880797078	0.880797078	0.880797078	0.135335283	-0.627111484	N
0.799256506	3.027805643	0.007055011	0.00806151	0.007461127	0.007525883	0.371	0.443	0.439	0.417666667	0	0.880797078	0.880797078	0.880797078	0.135335283	-0.576443145	N
0.875675676	0.632836189	1	1	1	1	1	1	1	1	0.5	0.5	0.5	0.5	1	0	N
0.683035714	2.193405246	0.008475784	0.013513598	0.010994691	0.010994691	0.11	0.349	0.2295	0.2295	0.166666667	0.880797078	0.952574127	0.92414182	0.092561176	-0.662017734	N
0.873831776	1.061463071	0.098411451	0.242381075	0.221875183	0.187555903	0.795	0.813	0.8	0.802666667	0	0.731058579	0.880797078	0.880797078	0.212850003	-0.550604905	N
0.728448276	1.365160514	0.012965395	1	0.160143317	0.264770679	0.144	1	0.7975	0.673166667	0.045454545	0.5	0.952574127	0.880797078	0.337667415	-0.340950068	N
0.886010363	2.77924057	0.009982093	0.016074584	0.010825795	0.011444137	0.109	0.457	0.347	0.331041667	0.021800948	0.880797078	0.952574127	0.880797078	0.096125685	-0.456869477	N
0.675	3.240235446	0.008136356	0.008811484	0.00847392	0.00847392	0.125	0.333	0.229	0.229	0	0.880797078	0.880797078	0.880797078	0.135335283	-0.648498538	N
0.815899582	4.828420047	0.012371205	0.012371205	0.012371205	0.012371205	0.358	0.358	0.358	0.358	0.066666667	0.880797078	0.880797078	0.880797078	0.135335283	-0.864664717	N
0.798586572	1.703697912	0.010971996	0.010971996	0.010971996	0.010971996	0.368	0.368	0.368	0.368	0	0.880797078	0.880797078	0.880797078	0.135335283	-0.864664717	N
0.765	1.403726012	0.011457618	0.014326796	0.012892207	0.012892207	0.336	0.362	0.349	0.349	0.222222222	0.880797078	0.880797078	0.880797078	0.135335283	-0.706634577	N
0.678571429	3.058077247	0.011641984	0.015922832	0.012152169	0.013238995	0.393	1	0.571	0.654666667	0	0.880797078	0.880797078	0.880797078	0.135335283	-0.576443145	N
0.800884956	4.097322295	0.009955707	0.010699043	0.010327375	0.010327375	0.388	0.409	0.3985	0.3985	0	0.880797078	0.880797078	0.880797078	0.135335283	-0.706634577	N
0.67826087	4.255487567	0.007809114	0.007809114	0.007809114	0.007809114	0.268	0.268	0.268	0.268	0	0.880797078	0.880797078	0.880797078	0.135335283	-0.864664717	N
0.837209302	3.621922429	0.007957924	0.015222438	0.008798616	0.010288309	0.122	0.399	0.333	0.309	0	0.880797078	0.952574127	0.880797078	0.11394823	-0.556455738	N
0.663461538	5.532296056	0.006024428	0.006024428	0.006024428	0.006024428	0.474	0.474	0.474	0.474	0	0.880797078	0.880797078	0.880797078	0.135335283	-0.864664717	N
0.651282051	2.813991968	0.011552296	0.011552296	0.011552296	0.011552296	0.203	0.203	0.203	0.203	0	0.952574127	0.952574127	0.952574127	0.049787068	-0.950212932	N
0.603375527	2.382968211	0.014692069	0.014692069	0.014692069	0.014692069	0.657	0.657	0.657	0.657	0	0.952574127	0.952574127	0.952574127	0.049787068	-0.950212932	N
0.861538462	3.192446173	0.00745447	0.010423687	0.008939079	0.008939079	0.338	0.531	0.4345	0.4345	0	0.731058579	0.880797078	0.817574476	0.251607362	-0.532226459	N
0.769230769	3.316384029	0.010430529	0.012847813	0.011927943	0.011735428	0.355	0.38	0.371	0.368666667	0.045454545	0.880797078	0.880797078	0.880797078	0.135335283	-0.592776027	N
0.841584158	3.102398485	0.008569024	0.015922832	0.011897077	0.012260109	0.354	1	0.7155	0.696333333	0	0.731058579	0.952574127	0.880797078	0.159834607	-0.47038307	N
0.796536797	2.619267234	0.008451248	0.008451248	0.008451248	0.008451248	0.519	0.519	0.519	0.519	0	0.880797078	0.880797078	0.880797078	0.135335283	-0.864664717	N
0.784	2.583332416	0.010430529	0.012847813	0.011927943	0.011735428	0.355	0.38	0.371	0.368666667	0.045454545	0.880797078	0.880797078	0.880797078	0.135335283	-0.592776027	N
0.63559322	3.121655752	0.011354659	0.018227641	0.016889686	0.015490662	0.317	0.407	0.388	0.370666667	0.157894737	0.952574127	0.952574127	0.952574127	0.049787068	-0.792182792	N
0.746268657	2.45561331	0.006291999	0.058448686	0.008857206	0.016147803	0.231	0.834	0.333	0.392625	0	0.731058579	0.952574127	0.880797078	0.132322722	-0.46931274	N
0.755868545	2.3865987	0.007910429	0.008310413	0.008110421	0.008110421	0.067	0.338	0.2025	0.2025	0	0.952574127	0.98201379	0.970687769	0.034051354	-0.749782467	N
0.664948454	1.149439408	0.012195455	0.060073869	0.036250087	0.036192374	0.11	0.834	0.539	0.5055	0	0.880797078	0.952574127	0.880797078	0.106819212	-0.585948502	N
0.671497585	2.494122747	0.008262629	0.008475784	0.008369207	0.008369207	0.349	0.404	0.3765	0.3765	0	0.880797078	0.952574127	0.92414182	0.092561176	-0.691272645	N
0.626168224	3.506906174	0.00616624	0.00616624	0.00616624	0.00616624	0.228	0.228	0.228	0.228	0	0.952574127	0.952574127	0.952574127	0.049787068	-0.950212932	N
0.791164659	1.956250329	0.00845632	0.013289921	0.01051968	0.010402195	0.105	0.323	0.2515	0.225166667	0.025345622	0.880797078	0.952574127	0.880797078	0.106819212	-0.463569265	N
0.769230769	3.455061525	0.006745005	0.006745005	0.006745005	0.006745005	0.386	0.386	0.386	0.386	0	0.880797078	0.880797078	0.880797078	0.135335283	-0.864664717	N
0.665137615	2.794649643	0.009265421	0.009492457	0.009378939	0.009378939	0.359	1	0.6795	0.6795	0	0.880797078	0.880797078	0.880797078	0.135335283	-0.648498538	N
0.816513761	2.385462226	0.007957924	0.010705814	0.008798616	0.009154118	0.316	0.362	0.333	0.337	0.066666667	0.880797078	0.952574127	0.880797078	0.106819212	-0.595453859	N
0.780172414	4.870936612	0.008867437	0.013435893	0.01069106	0.011012904	0.341	0.445	0.3875	0.392375	0	0.731058579	0.880797078	0.880797078	0.164403303	-0.476433517	N
0.848484848	3.251893192	0.010489713	0.014008335	0.011032586	0.011523375	0.249	0.319	0.308	0.2978	0.040650407	0.880797078	0.952574127	0.952574127	0.084006354	-0.570127759	N
0.698113208	2.733268438	0.006653295	0.008451248	0.007552271	0.007552271	0.42	0.519	0.4695	0.4695	0	0.880797078	0.880797078	0.880797078	0.135335283	-0.706634577	N
0.631355932	7.490031285	0.008360044	0.008360044	0.008360044	0.008360044	0.533	0.533	0.533	0.533	0	0.880797078	0.880797078	0.880797078	0.135335283	-0.864664717	N
0.797752809	1.501687349	0.060039855	0.060039855	0.060039855	0.060039855	0.77	0.77	0.77	0.77	0	0.880797078	0.880797078	0.880797078	0.135335283	-0.864664717	N
0.726027397	3.564839776	0.011552296	0.011552296	0.011552296	0.011552296	0.203	0.203	0.203	0.203	0	0.952574127	0.952574127	0.952574127	0.049787068	-0.950212932	N
0.82781457	3.552790555	0.007055011	0.011508902	0.009281957	0.009281957	0.336	0.439	0.3875	0.3875	0	0.880797078	0.880797078	0.880797078	0.135335283	-0.648498538	N
0.817258883	3.058571122	0.009351695	0.017357125	0.014749783	0.013661047	0.304	0.571	0.3525	0.409333333	0	0.731058579	0.952574127	0.880797078	0.159834607	-0.4591293	N
0.7775	2.481121018	0.010734353	0.010734353	0.010734353	0.010734353	0.21	0.21	0.21	0.21	0	0.880797078	0.880797078	0.880797078	0.135335283	-0.864664717	N
0.708333333	2.556343438	0.010430529	0.012847813	0.011927943	0.011735428	0.355	0.38	0.371	0.368666667	0.045454545	0.880797078	0.880797078	0.880797078	0.135335283	-0.592776027	N
0.783464567	4.581903159	0.00806151	0.221875183	0.036534322	0.068928301	0.348	0.834	0.637	0.5966	0	0.731058579	0.952574127	0.880797078	0.173289293	-0.450467747	N
0.706666667	2.921211554	0.007957924	0.014008335	0.011056726	0.01121179	0.109	0.457	0.3635	0.344333333	0.036231884	0.880797078	0.952574127	0.880797078	0.106819212	-0.469694823	N
0.591928251	2.972522925	0.008451248	0.008451248	0.008451248	0.008451248	0.519	0.519	0.519	0.519	0	0.880797078	0.880797078	0.880797078	0.135335283	-0.864664717	N
0.8125	2.678576166	0.008643443	0.012644054	0.011636958	0.01085783	0.307	0.452	0.332	0.3528	0	0.880797078	0.952574127	0.880797078	0.101115997	-0.535908473	N
0.657407407	1.411240122	0.007052908	0.242381075	0.054335591	0.089526291	0.216	0.813	0.5555	0.535	0.038461538	0.880797078	0.880797078	0.880797078	0.135335283	-0.538909168	N
0.890052356	1.993205808	0.098411451	0.241147477	0.221875183	0.187144704	0.8	0.814	0.813	0.809	0	0.731058579	0.880797078	0.731058579	0.290364722	-0.473090185	N
0.710144928	2.159332922	0.098411451	0.241147477	0.221875183	0.187144704	0.8	0.814	0.813	0.809	0	0.731058579	0.880797078	0.731058579	0.290364722	-0.473090185	N
0.612334802	2.730353889	0.010430529	0.016074584	0.011927943	0.012397337	0.347	0.38	0.362	0.363	0.049019608	0.880797078	0.952574127	0.880797078	0.11822564	-0.532721577	N
0.743119266	4.883080784	0.008926437	0.013809534	0.012126993	0.011620988	0.329	0.551	0.351	0.410333333	0	0.880797078	0.880797078	0.880797078	0.135335283	-0.576443145	N
0.643356643	1.40457638	0.012965395	0.221875183	0.098411451	0.11108401	0.487	0.813	0.8	0.7	0	0.731058579	0.952574127	0.880797078	0.184333931	-0.553282737	N
0.694444444	5.972902881	0.004270657	0.009541676	0.005962464	0.006410411	0.204	0.791	0.631	0.567	0	0.880797078	0.880797078	0.880797078	0.135335283	-0.504387751	N
0.617021277	4.708096744	0.0027639	0.01034465	0.006554275	0.006554275	0.486	0.65	0.568	0.568	0	0.880797078	0.952574127	0.92414182	0.092561176	-0.691272645	N
0.863849765	6.723024272	0.004270657	0.009541676	0.005962464	0.006410411	0.204	0.791	0.631	0.567	0	0.880797078	0.880797078	0.880797078	0.135335283	-0.504387751	N
0.851674641	1.92782644	0.004415156	0.013964285	0.006953692	0.008071706	0.565	0.625	0.588	0.5915	0	0.880797078	0.880797078	0.880797078	0.135335283	-0.529721921	N
0.711267606	2.918321168	0.006975651	0.006975651	0.006975651	0.006975651	0.67	0.67	0.67	0.67	0	0.952574127	0.952574127	0.952574127	0.049787068	-0.950212932	N
0.734234234	1.982137044	0.003531068	0.007694733	0.005929421	0.005481823	0.121	0.524	0.343	0.3466	0	0.880797078	0.952574127	0.952574127	0.084006354	-0.542397687	N
0.721153846	3.899561252	0.006132913	0.007400503	0.006766708	0.006766708	0.498	0.564	0.531	0.531	0	0.880797078	0.880797078	0.880797078	0.135335283	-0.706634577	N
0.813953488	3.975821751	0.004225588	0.005806461	0.005016025	0.005016025	0.641	0.833	0.737	0.737	0	0.880797078	0.880797078	0.880797078	0.135335283	-0.648498538	N
0.65258216	5.129950819	0.004782934	0.0072783	0.005187109	0.005451817	0.508	0.568	0.512	0.519125	0	0.880797078	0.880797078	0.880797078	0.135335283	-0.51180842	N
0.723849372	2.777729363	0.007352477	0.007352477	0.007352477	0.007352477	0.102	0.102	0.102	0.102	0	0.952574127	0.952574127	0.952574127	0.049787068	-0.950212932	N
0.602094241	4.357455341	0.004940504	0.005163242	0.005051873	0.005051873	0.134	0.617	0.3755	0.3755	0	0.880797078	0.952574127	0.92414182	0.092561176	-0.691272645	N
0.806629834	3.159597631	0.007553293	0.008775647	0.00816447	0.00816447	0.147	0.583	0.365	0.365	0	0.880797078	0.880797078	0.880797078	0.135335283	-0.706634577	N
0.829694323	2.395121284	0.011159321	0.011159321	0.011159321	0.011159321	0.541	0.541	0.541	0.541	0	0.880797078	0.880797078	0.880797078	0.135335283	-0.864664717	N
0.671568627	5.57590451	0.006197108	0.006197108	0.006197108	0.006197108	0.558	0.558	0.558	0.558	0	0.880797078	0.880797078	0.880797078	0.135335283	-0.864664717	N
0.982758621	4.019426724	0.004094301	0.004225588	0.004159945	0.004159945	0.565	0.641	0.603	0.603	0	0.880797078	0.880797078	0.880797078	0.135335283	-0.706634577	N
0.821782178	3.79371111	0.00488578	0.00488578	0.00488578	0.00488578	0.548	0.548	0.548	0.548	0	0.880797078	0.880797078	0.880797078	0.135335283	-0.864664717	N
0.765258216	4.352086186	0.006223144	0.006223144	0.006223144	0.006223144	0.128	0.128	0.128	0.128	0	0.880797078	0.880797078	0.880797078	0.135335283	-0.864664717	N
0.789215686	3.602468067	0.00488578	0.007330842	0.006108311	0.006108311	0.482	0.548	0.515	0.515	0	0.880797078	0.880797078	0.880797078	0.135335283	-0.648498538	N
0.65480427	1.976030036	0.004823408	0.00725564	0.005060453	0.005458429	0.059	1	0.557	0.4474	0	0.880797078	0.952574127	0.952574127	0.066896711	-0.561965239	N
0.654255319	2.960740829	0.005994643	0.007173169	0.006583906	0.006583906	0.529	0.632	0.5805	0.5805	0.011764706	0.880797078	0.880797078	0.880797078	0.135335283	-0.648498538	N
0.639810427	2.115503458	0.004804959	0.008178644	0.007330842	0.006812689	0.422	0.676	0.482	0.5204	0	0.731058579	0.880797078	0.880797078	0.181844115	-0.46886807	N
0.793969849	1.792193108	0.004281321	0.004281321	0.004281321	0.004281321	0.313	0.313	0.313	0.313	0	0.880797078	0.880797078	0.880797078	0.135335283	-0.864664717	N
0.650246305	5.38165514	0.005355543	0.009010827	0.005733815	0.006789096	0.276	0.601	0.537	0.4944	0.012345679	0.880797078	0.952574127	0.880797078	0.11822564	-0.51879883	N
0.677419355	2.644972001	0.008130937	0.008130937	0.008130937	0.008130937	0.408	0.408	0.408	0.408	0	0.880797078	0.880797078	0.880797078	0.135335283	-0.864664717	N
0.827777778	6.376906701	0.007330842	0.007330842	0.007330842	0.007330842	0.482	0.482	0.482	0.482	0	0.880797078	0.880797078	0.880797078	0.135335283	-0.864664717	N
0.666666667	2.161235894	0.007330842	0.007330842	0.007330842	0.007330842	0.482	0.482	0.482	0.482	0	0.880797078	0.880797078	0.880797078	0.135335283	-0.864664717	N
0.712871287	2.998453301	0.003525463	0.009110127	0.00619333	0.006169945	0.059	1	0.483	0.429	0.000632511	0.880797078	0.952574127	0.952574127	0.087214412	-0.479645039	N
0.824390244	2.820540344	0.003525463	0.003525463	0.003525463	0.003525463	0.069	0.069	0.069	0.069	0	0.952574127	0.952574127	0.952574127	0.049787068	-0.950212932	N
0.869346734	2.953060687	0.004281321	0.004281321	0.004281321	0.004281321	0.313	0.313	0.313	0.313	0	0.880797078	0.880797078	0.880797078	0.135335283	-0.864664717	N
0.761388286	1.319737144	0.004779067	0.004779067	0.004779067	0.004779067	0.406	0.406	0.406	0.406	0	0.952574127	0.952574127	0.952574127	0.049787068	-0.950212932	N
0.660633484	6.778268691	0.003438862	0.003438862	0.003438862	0.003438862	0.501	0.501	0.501	0.501	0.010362694	0.880797078	0.880797078	0.880797078	0.135335283	-0.864664717	N
0.600877193	2.479870002	0.004145191	0.00419665	0.004170921	0.004170921	0.405	0.479	0.442	0.442	0	0.880797078	0.880797078	0.880797078	0.135335283	-0.627111484	N
0.682539683	2.994972041	0.005524666	0.007107764	0.006207836	0.006281577	0.128	0.572	0.507	0.462454545	0.00141844	0.880797078	0.952574127	0.880797078	0.096449731	-0.48550305	N
0.644859813	2.797461089	0.006344457	0.007428872	0.006476225	0.006681445	0.215	0.403	0.3645	0.33675	0	0.880797078	0.952574127	0.92414182	0.092561176	-0.572496029	N
0.80155642	2.67287009	0.005306835	0.007488	0.006588218	0.006483841	0.093	0.529	0.493	0.441857143	0.003984064	0.880797078	0.880797078	0.880797078	0.135335283	-0.535060434	N
0.658227848	6.341784465	0.004355746	0.00488578	0.004620763	0.004620763	0.548	0.58	0.564	0.564	0	0.880797078	0.880797078	0.880797078	0.135335283	-0.706634577	N
0.738938053	2.096508421	0.005994643	0.009110127	0.006797421	0.006890405	0.117	0.574	0.512	0.461583333	0.00076864	0.880797078	0.952574127	0.880797078	0.104226841	-0.491341881	N
0.615079365	4.987209285	0.005633524	0.005633524	0.005633524	0.005633524	0.504	0.504	0.504	0.504	0	0.731058579	0.731058579	0.731058579	0.367879441	-0.632120559	N
0.687747036	1.723824952	0.006898379	0.009792184	0.007425121	0.008038561	0.459	0.478	0.459	0.465333333	0	0.880797078	0.880797078	0.880797078	0.135335283	-0.628119624	N
0.830845771	2.361546308	0.007553293	0.008775647	0.00816447	0.00816447	0.147	0.583	0.365	0.365	0	0.880797078	0.880797078	0.880797078	0.135335283	-0.706634577	N
0.7	1.815290991	0.005925876	0.005925876	0.005925876	0.005925876	0.443	0.443	0.443	0.443	0	0.880797078	0.880797078	0.880797078	0.135335283	-0.864664717	N
0.780082988	1.72802126	0.005955074	0.007090321	0.006432997	0.006393126	0.081	0.493	0.096	0.1696	0	0.880797078	0.952574127	0.92414182	0.092561176	-0.669885591	N
0.655677656	1.606674925	0.006898379	0.009792184	0.007425121	0.008038561	0.459	0.478	0.459	0.465333333	0	0.880797078	0.880797078	0.880797078	0.135335283	-0.628119624	N
0.81216458	1.623920811	0.004559567	0.009648838	0.00659354	0.007036999	0.428	0.666	0.5235	0.527333333	0.000500751	0.880797078	0.952574127	0.880797078	0.121077247	-0.466618605	N
0.75	1.441171478	0.004281321	0.007958712	0.005633363	0.006003398	0.313	0.54	0.426	0.441	0	0.880797078	0.952574127	0.880797078	0.11822564	-0.511954973	N
0.570754717	1.759747257	0.007425121	0.009792184	0.009406756	0.008874687	0.459	0.705	0.478	0.547333333	0	0.880797078	0.880797078	0.880797078	0.135335283	-0.602281384	N
0.726618705	1.586506277	0.004141593	0.012928101	0.007570917	0.008086113	0.147	0.641	0.586	0.5243	0.003868472	0.880797078	0.952574127	0.880797078	0.11822564	-0.472654531	N
0.806451613	1.672968595	0.005633524	0.009792184	0.006898379	0.007289357	0.114	0.541	0.478	0.440571429	0.002331002	0.731058579	0.952574127	0.880797078	0.156334704	-0.47211101	N
0.754807692	2.057081876	0.005925876	0.008178644	0.00705226	0.00705226	0.443	0.579	0.511	0.511	0	0.880797078	0.880797078	0.880797078	0.135335283	-0.648498538	N
0.78968254	1.773633405	0.0035595	0.010961988	0.004237871	0.005946884	0	0	0	0	0	0.880797078	0.952574127	0.952574127	0.07830314	-0.535908089	N
0.640909091	3.345822113	0.004907827	0.005429882	0.005168854	0.005168854	0.047	0.656	0.3515	0.3515	0	0.880797078	0.880797078	0.880797078	0.135335283	-0.648498538	N
0.786666667	1.931407769	0.006817685	0.008749062	0.00844494	0.008003896	0.421	0.62	0.613	0.551333333	0.030769231	0.880797078	0.952574127	0.880797078	0.106819212	-0.585948502	N
0.832	2.780862408	0.008272891	0.015126018	0.008561383	0.010130419	0	0	0	0	0	0.880797078	0.880797078	0.880797078	0.135335283	-0.648498538	N
0.615	2.792255983	0.005903048	0.010399213	0.008418224	0.008240162	0.128	0.539	0.52	0.395666667	0	0.880797078	0.880797078	0.880797078	0.135335283	-0.576443145	N
0.701244813	5.470156634	0.004836865	0.005994665	0.005955074	0.005595535	0.081	0.478	0.096	0.218333333	0	0.880797078	0.880797078	0.880797078	0.135335283	-0.864664717	N
0.688073394	3.386981114	0.003553014	0.007636789	0.004503329	0.004932927	0.088	0.436	0.328	0.305	0.011494253	0.880797078	0.952574127	0.880797078	0.11394823	-0.495822549	N
0.61038961	2.134577311	0.003595244	0.007454706	0.006594745	0.006067151	0.049	0.574	0.505	0.452142857	0.004016064	0.880797078	0.952574127	0.880797078	0.106819212	-0.533941246	N
0.647840532	2.1886147	0.004069671	0.005191629	0.004993764	0.004751688	0.486	0.589	0.582	0.552333333	0	0.880797078	0.880797078	0.880797078	0.135335283	-0.653957864	N
0.668032787	2.888303885	0.004651078	0.007702083	0.007645346	0.006666169	0.064	0.458	0.11	0.210666667	0	0.880797078	0.952574127	0.92414182	0.092561176	-0.669885591	N
0.783972125	2.156452339	0.004225588	0.004225588	0.004225588	0.004225588	0.641	0.641	0.641	0.641	0	0.880797078	0.880797078	0.880797078	0.135335283	-0.864664717	N
0.767857143	3.130186597	0.004907827	0.005355543	0.005131685	0.005131685	0.047	0.555	0.301	0.301	0	0.880797078	0.880797078	0.880797078	0.135335283	-0.648498538	N
0.610441767	1.774883243	0.006207836	0.006868169	0.006594745	0.006556917	0.556	0.574	0.556	0.562	0.004524887	0.880797078	0.952574127	0.952574127	0.07830314	-0.685151767	N
0.67611336	3.039724897	0.004836865	0.013005666	0.00680551	0.007188831	0.122	0.636	0.474	0.438	0	0.880797078	0.98201379	0.880797078	0.094175844	-0.512721126	N
0.795918367	3.914800698	0.004387609	0.006311379	0.004426732	0.005041907	0.243	0.673	0.422	0.446	0	0.880797078	0.952574127	0.952574127	0.07830314	-0.601462391	N
0.641025641	1.745247129	0.005604816	0.008663502	0.006508833	0.006713467	0.41	0.697	0.51	0.5225	0	0.731058579	0.952574127	0.880797078	0.164734472	-0.491857551	N
0.797468354	5.413125231	0.004836865	0.007556975	0.00619692	0.00619692	0.378	0.478	0.428	0.428	0	0.880797078	0.952574127	0.92414182	0.092561176	-0.669885591	N
0.676767677	1.833884836	0.006013278	0.009648838	0.006797421	0.007254729	0.503	0.666	0.5495	0.55275	0.000946074	0.880797078	0.952574127	0.880797078	0.11394823	-0.506631247	N
0.731428571	2.382380782	0.003542326	0.011460227	0.005567569	0.006279096	0.059	0.66	0.457	0.394538462	0.000313578	0.880797078	0.952574127	0.880797078	0.095851492	-0.480012188	N
0.67357513	3.36223279	0.005060176	0.013321544	0.013215187	0.010532303	0.49	0.632	0.632	0.584666667	0	0.880797078	0.952574127	0.880797078	0.106819212	-0.585948502	N
0.834080717	3.923285395	0.007694733	0.007694733	0.007694733	0.007694733	0.221	0.221	0.221	0.221	0	0.952574127	0.952574127	0.952574127	0.049787068	-0.950212932	N
0.788	1.918522121	0.005168984	0.009354998	0.008130937	0.00755164	0.09	0.535	0.408	0.344333333	0	0.880797078	0.880797078	0.880797078	0.135335283	-0.576443145	N
0.93	1.561654418	0.006898379	0.009792184	0.007425121	0.008038561	0.459	0.478	0.459	0.465333333	0	0.880797078	0.880797078	0.880797078	0.135335283	-0.628119624	N
0.646766169	11.7621078	0.00633233	0.007272036	0.006802183	0.006802183	0.14	0.343	0.2415	0.2415	0	0.880797078	0.880797078	0.880797078	0.135335283	-0.864664717	N
0.669527897	3.499259708	0.006850179	0.006850179	0.006850179	0.006850179	0.452	0.452	0.452	0.452	0	0.880797078	0.880797078	0.880797078	0.135335283	-0.864664717	N
0.799086758	1.850352746	0.006898379	0.009792184	0.007425121	0.008038561	0.459	0.478	0.459	0.465333333	0	0.880797078	0.880797078	0.880797078	0.135335283	-0.628119624	N
0.599009901	2.544658357	0.007279705	0.007279705	0.007279705	0.007279705	0.294	0.294	0.294	0.294	0	0.952574127	0.952574127	0.952574127	0.049787068	-0.950212932	N
0.745535714	3.811995187	0.00536307	0.007136341	0.006190839	0.006220272	0.082	0.469	0.279	0.27725	0	0.952574127	0.98201379	0.952574127	0.039296592	-0.636972113	N
0.67192429	3.503348957	0.004476806	0.006602618	0.006175165	0.00575153	0.507	0.659	0.541	0.569	0	0.880797078	0.880797078	0.880797078	0.135335283	-0.628119624	N
0.711229947	2.658632474	0.006760616	0.009110127	0.007359518	0.00774342	0.466	0.507	0.503	0.492	0	0.880797078	0.952574127	0.880797078	0.106819212	-0.621292099	N
0.750957854	2.815404598	0.004483206	0.009792184	0.00716175	0.007149723	0.359	0.478	0.459	0.43875	0	0.880797078	0.880797078	0.880797078	0.135335283	-0.569483468	N
0.754098361	3.651254743	0.004483206	0.004483206	0.004483206	0.004483206	0.359	0.359	0.359	0.359	0	0.880797078	0.880797078	0.880797078	0.135335283	-0.864664717	N
0.707920792	1.72754885	0.005925876	0.005925876	0.005925876	0.005925876	0.443	0.443	0.443	0.443	0	0.880797078	0.880797078	0.880797078	0.135335283	-0.864664717	N
0.823232323	3.251984918	0.004907827	0.008058347	0.006483087	0.006483087	0.047	0.222	0.1345	0.1345	0	0.880797078	0.880797078	0.880797078	0.135335283	-0.627111484	N
0.647826087	2.183622829	0.004281321	0.007388651	0.005834986	0.005834986	0.313	0.575	0.444	0.444	0	0.880797078	0.952574127	0.92414182	0.092561176	-0.691272645	N
0.620879121	4.519431101	0.007920212	0.007920212	0.007920212	0.007920212	0.508	0.508	0.508	0.508	0	0.880797078	0.880797078	0.880797078	0.135335283	-0.864664717	N
0.713675214	1.988090748	0.005524666	0.007635799	0.006167087	0.006392908	0.115	0.556	0.47	0.4325	0.004081633	0.880797078	0.952574127	0.880797078	0.101115997	-0.540529454	N
0.615740741	2.508135876	0.005428871	0.010031141	0.006427298	0.00680914	0.128	0.572	0.458	0.443947368	0.000336814	0.880797078	0.952574127	0.952574127	0.085807369	-0.477517419	N
0.87745098	6.112154484	0.00686907	0.009602783	0.008235926	0.008235926	0.475	0.501	0.488	0.488	0	0.952574127	0.98201379	0.970687769	0.034051354	-0.720527556	N
0.788844622	4.127482595	0.00788651	0.007920212	0.007903361	0.007903361	0.508	0.567	0.5375	0.5375	0	0.731058579	0.880797078	0.817574476	0.251607362	-0.532226459	N
0.684	4.388432832	0.004027898	0.006905598	0.004898495	0.005008889	0.419	0.617	0.529	0.5328	0.000690369	0.880797078	0.880797078	0.880797078	0.135335283	-0.484867361	N
0.651376147	2.483236843	0.007199065	0.010781019	0.008418224	0.008799436	0.52	0.754	0.615	0.629666667	0	0.880797078	0.880797078	0.880797078	0.135335283	-0.602281384	N
0.668103448	1.88586555	0.006333572	0.006333572	0.006333572	0.006333572	0.273	0.273	0.273	0.273	0	0.952574127	0.952574127	0.952574127	0.049787068	-0.950212932	N
0.697183099	3.031902907	0.004651078	0.009174213	0.006912646	0.006912646	0.064	0.484	0.274	0.274	0	0.952574127	0.952574127	0.952574127	0.049787068	-0.704791841	N
0.646788991	4.398940715	0.005994643	0.013205995	0.00675885	0.008653163	0.154	0.65	0.486	0.43	0	0.880797078	0.880797078	0.880797078	0.135335283	-0.648498538	N
0.691304348	2.429173622	0.004416602	0.008663502	0.006734502	0.006613142	0.093	0.697	0.513	0.476333333	0	0.731058579	0.952574127	0.880797078	0.156334704	-0.486840254	N
0.731343284	2.174585705	0.005925876	0.008178644	0.007500244	0.007276252	0	0	0	0	0	0.880797078	0.952574127	0.880797078	0.106819212	-0.595453859	N
0.690763052	2.107080623	0.005633524	0.005633524	0.005633524	0.005633524	0.504	0.504	0.504	0.504	0	0.731058579	0.731058579	0.731058579	0.367879441	-0.632120559	N
0.817307692	2.041760773	0.004651078	0.009174213	0.007964536	0.007438591	0.064	0.543	0.471	0.38725	0	0.880797078	0.952574127	0.952574127	0.071174122	-0.575875828	N
0.684466019	1.942969543	0.006760616	0.009110127	0.007935372	0.007935372	0.503	0.507	0.505	0.505	0	0.880797078	0.880797078	0.880797078	0.135335283	-0.648498538	N
0.747863248	2.722873814	0.006850179	0.006850179	0.006850179	0.006850179	0.452	0.452	0.452	0.452	0	0.880797078	0.880797078	0.880797078	0.135335283	-0.864664717	N
0.73655914	4.868253099	0.007330842	0.008557669	0.007462348	0.007783619	0.128	0.505	0.482	0.371666667	0	0.880797078	0.880797078	0.880797078	0.135335283	-0.648498538	N
0.774193548	2.269924724	0.003282366	0.006816295	0.005461556	0.00518225	0.055	0.555	0.466	0.4363	0	0.880797078	0.952574127	0.92414182	0.092561176	-0.492975	N
0.649305556	2.096386264	0.004281321	0.007958712	0.006120016	0.006120016	0.313	0.54	0.4265	0.4265	0	0.880797078	0.952574127	0.92414182	0.092561176	-0.669885591	N
0.75	2.925386713	0.004823462	0.010322266	0.006850179	0.007594742	0.121	0.529	0.452	0.345	0.008	0.880797078	0.880797078	0.880797078	0.135335283	-0.528100596	N
0.642307692	2.894079868	0.004328717	0.005402078	0.004865397	0.004865397	0.451	1	0.7255	0.7255	0	0.880797078	0.880797078	0.880797078	0.135335283	-0.648498538	N
0.79144385	2.676141874	0.004461813	0.007865498	0.007460659	0.006660419	0.073	1	0.407	0.4246	0	0.880797078	0.952574127	0.880797078	0.11394823	-0.545762211	N
0.641434263	2.891579702	0.005065329	0.005065329	0.005065329	0.005065329	0.299	0.299	0.299	0.299	0	0.880797078	0.880797078	0.880797078	0.135335283	-0.864664717	N
0.800970874	2.504900483	0.006013278	0.006013278	0.006013278	0.006013278	0.543	0.543	0.543	0.543	0	0.880797078	0.880797078	0.880797078	0.135335283	-0.864664717	N
0.623188406	1.526748464	0.003531068	0.009792184	0.006239551	0.006435827	0.37	1	0.4665	0.501642857	0	0.880797078	0.952574127	0.952574127	0.086450589	-0.491156959	N
0.64921466	2.884115851	0.005355543	0.008262956	0.00680925	0.00680925	0.555	0.608	0.5815	0.5815	0	0.880797078	0.880797078	0.880797078	0.135335283	-0.648498538	N
0.753424658	1.758260719	0.005811194	0.00838451	0.007801008	0.007541784	0.536	0.649	0.576	0.587	0	0.880797078	0.880797078	0.880797078	0.135335283	-0.546704129	N
0.80078125	1.737632404	0.008130937	0.008130937	0.008130937	0.008130937	0.408	0.408	0.408	0.408	0	0.880797078	0.880797078	0.880797078	0.135335283	-0.864664717	N
0.744565217	4.146362189	0.005621575	0.006010327	0.005815951	0.005815951	0.645	0.711	0.678	0.678	0	0.731058579	0.731058579	0.731058579	0.367879441	-0.474090419	N
0.699029126	3.350509105	0.004940504	0.005163242	0.005051873	0.005051873	0.134	0.617	0.3755	0.3755	0	0.880797078	0.952574127	0.92414182	0.092561176	-0.691272645	N
0.603448276	2.59776524	0.003525463	0.011460227	0.006207836	0.006513952	0.069	0.572	0.397	0.344153846	0.001325381	0.880797078	0.952574127	0.952574127	0.069528964	-0.502537835	N
0.645933014	2.568231246	0.006518726	0.007746201	0.007253992	0.007193228	0.102	0.617	0.102	0.23075	0	0.880797078	0.952574127	0.952574127	0.071174122	-0.597723565	N
0.8	2.803825858	0.006178824	0.011460227	0.006929588	0.008189546	0.458	0.572	0.515	0.515	0.002624672	0.880797078	0.952574127	0.952574127	0.07830314	-0.659313528	N
0.572	1.884341967	0.005225284	0.005225284	0.005225284	0.005225284	0.622	0.622	0.622	0.622	0	0.880797078	0.880797078	0.880797078	0.135335283	-0.864664717	N
0.602459016	2.094885641	0.004476806	0.00838451	0.006316995	0.006223427	0.11	1	0.5745	0.592214286	0	0.880797078	0.952574127	0.880797078	0.110892936	-0.470778551	N
0.782608696	1.913671436	0.004281321	0.007692422	0.005986871	0.005986871	0.313	0.754	0.5335	0.5335	0	0.880797078	0.880797078	0.880797078	0.135335283	-0.627111484	N
0.685483871	1.503446825	0.005948681	0.008100937	0.007136341	0.006952015	0.082	0.622	0.469	0.426	0	0.880797078	0.952574127	0.952574127	0.07830314	-0.604959216	N
0.823232323	3.54529673	0.005857573	0.01034465	0.007974798	0.008037955	0.119	0.524	0.447	0.38425	0	0.880797078	0.880797078	0.880797078	0.135335283	-0.554949458	N
0.795652174	1.540762909	0.006898379	0.011130223	0.008608652	0.008811477	0.459	0.551	0.4685	0.48675	0	0.880797078	0.952574127	0.880797078	0.11394823	-0.580176995	N
0.785714286	1.899288324	0.005733815	0.005733815	0.005733815	0.005733815	0.537	0.537	0.537	0.537	0	0.952574127	0.952574127	0.952574127	0.049787068	-0.950212932	N
0.668421053	1.711513183	0.005414831	0.008332518	0.006587581	0.006730628	0.583	1	0.6645	0.728	0	0.880797078	0.880797078	0.880797078	0.135335283	-0.529721921	N
0.679775281	1.978219681	0.003542326	0.005567569	0.004328478	0.004460639	0.059	0.519	0.415	0.337571429	0	0.880797078	0.952574127	0.952574127	0.086450589	-0.513117885	N
0.606965174	6.26588225	0.005994643	0.007920212	0.006957428	0.006957428	0.508	0.529	0.5185	0.5185	0.011235955	0.880797078	0.880797078	0.880797078	0.135335283	-0.648498538	N
0.87755102	5.184613711	0.009187327	0.009187327	0.009187327	0.009187327	0.626	0.626	0.626	0.626	0	0.952574127	0.952574127	0.952574127	0.049787068	-0.950212932	N
0.815498155	2.60201762	0.006223144	0.009010827	0.008772409	0.008002127	0.122	0.276	0.128	0.175333333	0	0.880797078	0.952574127	0.880797078	0.106819212	-0.585948502	N
0.708542714	2.033605847	0.01034465	0.01034465	0.01034465	0.01034465	0.486	0.486	0.486	0.486	0	0.880797078	0.880797078	0.880797078	0.135335283	-0.864664717	N
0.603524229	4.540631609	0.007425121	0.009792184	0.008608652	0.008608652	0.459	0.478	0.4685	0.4685	0	0.880797078	0.880797078	0.880797078	0.135335283	-0.706634577	N
0.623076923	2.172658814	0.006148881	0.006409241	0.006279061	0.006279061	0.434	0.547	0.4905	0.4905	0	0.952574127	0.952574127	0.952574127	0.049787068	-0.734046752	N
0.655737705	3.097511764	0.004266026	0.005460787	0.004863407	0.004863407	0.503	0.683	0.593	0.593	0.016393443	0.880797078	0.880797078	0.880797078	0.135335283	-0.648498538	N
0.643902439	5.515262321	0.004268932	0.00581222	0.004898495	0.004943828	0.473	0.617	0.529	0.537333333	0	0.880797078	0.880797078	0.880797078	0.135335283	-0.523766431	N
0.649746193	2.805016656	0.006364496	0.006364496	0.006364496	0.006364496	0.465	0.465	0.465	0.465	0	0.952574127	0.952574127	0.952574127	0.049787068	-0.950212932	N
0.66	2.889428302	0.003525463	0.009174213	0.007694733	0.006421894	0.059	0.626	0.458	0.339555556	0	0.880797078	0.952574127	0.952574127	0.087808497	-0.495713555	N
0.833333333	1.650045082	0.006050298	0.017942815	0.007391723	0.008301595	0.177	0.738	0.4995	0.447055556	0	0.880797078	0.952574127	0.880797078	0.11822564	-0.471210065	N
0.78968254	2.963543574	0.006207836	0.006868169	0.006594745	0.006556917	0.556	0.574	0.556	0.562	0.004524887	0.880797078	0.952574127	0.952574127	0.07830314	-0.685151767	N
0.82464455	4.378379841	0.007920212	0.007920212	0.007920212	0.007920212	0.508	0.508	0.508	0.508	0	0.880797078	0.880797078	0.880797078	0.135335283	-0.864664717	N
0.628440367	1.668977019	0.006760616	0.009110127	0.007935372	0.007935372	0.503	0.507	0.505	0.505	0	0.880797078	0.880797078	0.880797078	0.135335283	-0.648498538	N
0.711764706	5.732774448	0.01355614	0.01355614	0.01355614	0.01355614	0.616	0.616	0.616	0.616	0	0.880797078	0.880797078	0.880797078	0.135335283	-0.864664717	N
0.651452282	4.583715339	0.005633524	0.006665141	0.006149332	0.006149332	0.504	0.648	0.576	0.576	0	0.731058579	0.880797078	0.817574476	0.251607362	-0.532226459	N
0.65258216	1.926441928	0.006013278	0.006278266	0.006145772	0.006145772	0.52	0.543	0.5315	0.5315	0	0.880797078	0.952574127	0.92414182	0.092561176	-0.662017734	N
0.691176471	1.595734513	0.006760616	0.009110127	0.007935372	0.007935372	0.503	0.507	0.505	0.505	0	0.880797078	0.880797078	0.880797078	0.135335283	-0.648498538	N
0.694915254	3.699154848	0.007920212	0.007920212	0.007920212	0.007920212	0.508	0.508	0.508	0.508	0	0.880797078	0.880797078	0.880797078	0.135335283	-0.864664717	N
0.820083682	2.181019675	0.006535471	0.009110127	0.006826358	0.007318418	0.466	0.507	0.503	0.4942	0	0.880797078	0.952574127	0.880797078	0.101115997	-0.54983122	N
0.837837838	2.983120467	0.004281321	0.004281321	0.004281321	0.004281321	0.313	0.313	0.313	0.313	0	0.880797078	0.880797078	0.880797078	0.135335283	-0.864664717	N
0.674641148	1.860368985	0.006898379	0.009792184	0.007425121	0.008038561	0.459	0.478	0.459	0.465333333	0	0.880797078	0.880797078	0.880797078	0.135335283	-0.628119624	N
0.584821429	3.892502728	0.004836865	0.009010827	0.007190037	0.007029031	0.276	0.547	0.3915	0.394833333	0	0.880797078	0.880797078	0.880797078	0.135335283	-0.515376901	N
0.733031674	1.570315607	0.007635799	0.007635799	0.007635799	0.007635799	0.115	0.115	0.115	0.115	0	1	0				N
0.567164179	2.021428965	0.005733815	0.005733815	0.005733815	0.005733815	0.537	0.537	0.537	0.537	0	0.952574127	0.952574127	0.952574127	0.049787068	-0.950212932	N
0.815384615	10.45518092	0.00667994	0.008165947	0.007226903	0.007357597	0.32	0.524	0.523	0.455666667	0	0.880797078	0.952574127	0.952574127	0.07830314	-0.633475288	N
0.690140845	6.117415313	0.006883612	0.006883612	0.006883612	0.006883612	0.541	0.541	0.541	0.541	0	0.880797078	0.880797078	0.880797078	0.135335283	-0.864664717	N
0.841121495	3.914136126	0.005093981	0.005093981	0.005093981	0.005093981	0.717	0.717	0.717	0.717	0	0.880797078	0.880797078	0.880797078	0.135335283	-0.864664717	N
0.643171806	5.619297135	0.006132913	0.006132913	0.006132913	0.006132913	0.564	0.564	0.564	0.564	0	0.880797078	0.880797078	0.880797078	0.135335283	-0.864664717	N
0.60754717	1.91513756	0.005060453	0.005060453	0.005060453	0.005060453	0.059	0.059	0.059	0.059	0	0.952574127	0.952574127	0.952574127	0.049787068	-0.950212932	N
0.673913043	3.168034627	0.004027898	0.005001891	0.004806541	0.00460661	0.419	0.617	0.518	0.525125	0	0.880797078	0.880797078	0.880797078	0.135335283	-0.500907913	N
0.897435897	3.79101936	0.004336224	0.008703345	0.004976853	0.005934813	0.464	0.597	0.548	0.5342	0	0.880797078	0.880797078	0.880797078	0.135335283	-0.537402363	N
0.768907563	2.257203792	0.004225588	0.004225588	0.004225588	0.004225588	0.641	0.641	0.641	0.641	0	0.880797078	0.880797078	0.880797078	0.135335283	-0.864664717	N
0.612149533	2.279075866	0.005792701	0.007107764	0.006171143	0.006253762	0.351	0.434	0.397	0.3898	0	0.880797078	0.952574127	0.952574127	0.066896711	-0.587237402	N
0.878923767	2.984520448	0.006197108	0.015323735	0.008797702	0.010106182	0.508	0.558	0.533	0.533	0	0.880797078	0.880797078	0.880797078	0.135335283	-0.648498538	N
0.744318182	2.391387303	0.004266026	0.00838451	0.005460787	0.006037108	0.503	0.683	0.601	0.595666667	0.007518797	0.880797078	0.880797078	0.880797078	0.135335283	-0.576443145	N
0.765432099	3.200489074	0.004907827	0.004907827	0.004907827	0.004907827	0.047	0.047	0.047	0.047	0	0.880797078	0.880797078	0.880797078	0.135335283	-0.864664717	N
0.849765258	3.484872111	0.006333572	0.006333572	0.006333572	0.006333572	0.273	0.273	0.273	0.273	0	0.952574127	0.952574127	0.952574127	0.049787068	-0.950212932	N
0.743396226	2.806560659	0.006223144	0.006223144	0.006223144	0.006223144	0.128	0.128	0.128	0.128	0	0.880797078	0.880797078	0.880797078	0.135335283	-0.864664717	N
0.705607477	2.013542971	0.006535471	0.00727787	0.006794703	0.006850687	0.238	0.507	0.363	0.36775	0	0.880797078	0.952574127	0.952574127	0.071174122	-0.630171384	N
0.671171171	2.763665206	0.005154772	0.009187327	0.006755471	0.006935476	0.17	0.648	0.474	0.4523	0	0.880797078	0.98201379	0.880797078	0.112827743	-0.488280942	N
0.798045603	3.524174679	0.004894788	0.00654234	0.00527811	0.005498337	0.485	0.617	0.613	0.582	0	0.880797078	0.880797078	0.880797078	0.135335283	-0.627619507	N
0.731225296	3.710498612	0.003222115	0.007636789	0.004836865	0.005320251	0.299	0.574	0.516	0.489636364	0.00074129	0.880797078	0.952574127	0.880797078	0.104226841	-0.480354802	N
0.671171171	2.011664567	0.004225588	0.004225588	0.004225588	0.004225588	0.641	0.641	0.641	0.641	0	0.880797078	0.880797078	0.880797078	0.135335283	-0.864664717	N
0.864864865	4.141240955	0.006013278	0.00727787	0.006661155	0.006592303	0.238	0.574	0.508	0.482857143	0.000552792	0.880797078	0.952574127	0.952574127	0.080340002	-0.491640643	N
0.765957447	2.751013806	0.006774763	0.008775647	0.007553293	0.007701234	0.147	0.583	0.467	0.399	0	0.880797078	0.952574127	0.880797078	0.106819212	-0.611786741	N
0.785365854	3.027783382	0.007694733	0.007694733	0.007694733	0.007694733	0.221	0.221	0.221	0.221	0	0.952574127	0.952574127	0.952574127	0.049787068	-0.950212932	N
0.659793814	1.493870001	0.006760616	0.009110127	0.007359518	0.00774342	0.466	0.507	0.503	0.492	0	0.880797078	0.952574127	0.880797078	0.106819212	-0.621292099	N
0.729885057	1.847825084	0.006898379	0.009406756	0.007425121	0.007910085	0.459	0.705	0.478	0.547333333	0	0.880797078	0.880797078	0.880797078	0.135335283	-0.576443145	N
0.830917874	2.459820986	0.005981737	0.007107764	0.006193305	0.006369028	0.351	0.434	0.3835	0.388	0	0.880797078	0.952574127	0.952574127	0.071174122	-0.604576609	N
0.7890625	2.855886585	0.006013278	0.006223144	0.00619333	0.00615577	0.128	0.572	0.5495	0.44975	0.006896552	0.880797078	0.952574127	0.92414182	0.092561176	-0.572496029	N
0.678733032	6.894093545	0.006197108	0.006197108	0.006197108	0.006197108	0.558	0.558	0.558	0.558	0	0.880797078	0.880797078	0.880797078	0.135335283	-0.864664717	N
0.769547325	4.517368791	0.006304496	0.006304496	0.006304496	0.006304496	0.335	0.335	0.335	0.335	0	0.880797078	0.880797078	0.880797078	0.135335283	-0.864664717	N
0.597345133	1.725101805	0.002396282	0.003525463	0.002589627	0.002837124	0.069	0.509	0.39	0.322666667	0	0.880797078	0.952574127	0.880797078	0.106819212	-0.621292099	N
0.653992395	1.667615447	0.003595244	0.003595244	0.003595244	0.003595244	0.505	0.505	0.505	0.505	0	0.880797078	0.880797078	0.880797078	0.135335283	-0.864664717	N
0.683544304	1.018755593	0.004665319	0.007694733	0.006399447	0.006254886	0.112	0.42	0.1925	0.2406	0	0.880797078	0.952574127	0.952574127	0.05834189	-0.523595036	N
0.894736842	1.598282034	0.0035595	0.0035595	0.0035595	0.0035595	0.412	0.412	0.412	0.412	0	0.952574127	0.952574127	0.952574127	0.049787068	-0.950212932	N
0.502283105	3.358341637	0.004198008	0.005994643	0.005096326	0.005096326	0.306	0.529	0.4175	0.4175	0.022222222	0.880797078	0.952574127	0.92414182	0.092561176	-0.669885591	N
0.731308411	2.440859309	0.00793411	0.009098665	0.008287871	0.008411691	0.536	0.626	0.601	0.5866	0	0.880797078	0.952574127	0.880797078	0.101115997	-0.54275233	N
0.795454545	4.109612177	0.00581222	0.007627676	0.006773391	0.006737762	0.473	0.49	0.48	0.481	0.001262095	0.731058579	0.880797078	0.880797078	0.212850003	-0.550604905	N
0.711627907	6.43350602	0.005333959	0.006010327	0.005672143	0.005672143	0.645	0.767	0.706	0.706	0	0.731058579	0.880797078	0.817574476	0.251607362	-0.532226459	N
0.720930233	2.727351817	0.005733815	0.005733815	0.005733815	0.005733815	0.537	0.537	0.537	0.537	0	0.952574127	0.952574127	0.952574127	0.049787068	-0.950212932	N
0.618090452	3.43747865	0.007330842	0.014088754	0.010709798	0.010709798	0.482	0.622	0.552	0.552	0	0.880797078	0.880797078	0.880797078	0.135335283	-0.627111484	N
0.783269962	1.745467204	0.003595244	0.004836865	0.004069671	0.00416726	0.478	0.589	0.505	0.524	0	0.880797078	0.880797078	0.880797078	0.135335283	-0.576443145	N
0.879781421	2.17563772	0.005925876	0.005925876	0.005925876	0.005925876	0.443	0.443	0.443	0.443	0	0.880797078	0.880797078	0.880797078	0.135335283	-0.864664717	N
0.666666667	1.668346771	0.006409241	0.006930863	0.006670052	0.006670052	0.133	0.434	0.2835	0.2835	0	0.952574127	0.952574127	0.952574127	0.049787068	-0.704791841	N
0.855769231	2.275953312	0.005154772	0.005765656	0.005633524	0.005517984	0.504	0.58	0.547	0.543666667	0	0.731058579	0.880797078	0.880797078	0.212850003	-0.550604905	N
0.713656388	2.0558705	0.005154772	0.008186288	0.005845766	0.006221876	0.17	0.648	0.5255	0.482	0	0.731058579	0.880797078	0.880797078	0.181844115	-0.496773369	N
0.918367347	2.757376958	0.005428871	0.010031141	0.006367628	0.006578193	0.128	0.572	0.4795	0.452791667	0.000237135	0.880797078	0.952574127	0.952574127	0.085432158	-0.467563004	N
0.628272251	3.11613692	0.005060176	0.005296304	0.00517824	0.00517824	0.156	0.49	0.323	0.323	0	0.880797078	0.952574127	0.92414182	0.092561176	-0.691272645	N
0.793103448	5.128141797	0.007920212	0.007920212	0.007920212	0.007920212	0.508	0.508	0.508	0.508	0	0.880797078	0.880797078	0.880797078	0.135335283	-0.864664717	N
0.845890411	3.395184575	0.006664193	0.006664193	0.006664193	0.006664193	0.582	0.582	0.582	0.582	0	0.880797078	0.880797078	0.880797078	0.135335283	-0.864664717	N
0.708994709	1.608060265	0.007425121	0.009792184	0.008608652	0.008608652	0.459	0.478	0.4685	0.4685	0	0.880797078	0.880797078	0.880797078	0.135335283	-0.706634577	N
0.607594937	1.942331107	0.005414831	0.009648838	0.007553293	0.007538987	0.583	1	0.666	0.749666667	0	0.880797078	0.880797078	0.880797078	0.135335283	-0.576443145	N
0.792792793	3.324536558	0.006811349	0.006876282	0.006843816	0.006843816	0.564	0.683	0.6235	0.6235	0	0.880797078	0.880797078	0.880797078	0.135335283	-0.706634577	N
0.674008811	4.059612793	0.005065329	0.005065329	0.005065329	0.005065329	0.299	0.299	0.299	0.299	0	0.880797078	0.880797078	0.880797078	0.135335283	-0.864664717	N
0.829383886	3.197128456	0.005524666	0.009318383	0.006341374	0.006823254	0.15	0.642	0.454	0.4386	0	0.880797078	0.952574127	0.880797078	0.11394823	-0.556455738	N
0.664516129	7.27746546	0.003438862	0.003438862	0.003438862	0.003438862	0.501	0.501	0.501	0.501	0.010362694	0.880797078	0.880797078	0.880797078	0.135335283	-0.864664717	N
0.617021277	2.726934891	0.007279705	0.007279705	0.007279705	0.007279705	0.294	0.294	0.294	0.294	0	0.952574127	0.952574127	0.952574127	0.049787068	-0.950212932	N
0.573913043	1.756399978	0.012441615	0.012441615	0.012441615	0.012441615	0.657	0.657	0.657	0.657	0	0.952574127	0.952574127	0.952574127	0.049787068	-0.950212932	N
0.888324873	3.26881362	0.005460787	0.00838451	0.006922648	0.006922648	0.503	0.601	0.552	0.552	0.014492754	0.880797078	0.880797078	0.880797078	0.135335283	-0.648498538	N
0.700819672	3.620140824	0.006760616	0.009110127	0.007359518	0.00774342	0.466	0.507	0.503	0.492	0	0.880797078	0.952574127	0.880797078	0.106819212	-0.621292099	N
0.889423077	1.874884662	0.005414831	0.010466238	0.006989879	0.007514908	0.499	1	0.6245	0.710833333	0	0.880797078	0.952574127	0.880797078	0.121077247	-0.50914043	N
0.793859649	3.540847826	0.004225588	0.004225588	0.004225588	0.004225588	0.641	0.641	0.641	0.641	0	0.880797078	0.880797078	0.880797078	0.135335283	-0.864664717	N
0.791164659	1.521194403	0.006760616	0.009110127	0.007359518	0.00774342	0.466	0.507	0.503	0.492	0	0.880797078	0.952574127	0.880797078	0.106819212	-0.621292099	N
0.713709677	3.854213065	0.006337431	0.01227834	0.011521549	0.010045773	0.415	0.724	0.668	0.602333333	0	0.952574127	0.952574127	0.952574127	0.049787068	-0.792182792	N
0.729591837	1.969845515	0.003222115	0.011460227	0.004948023	0.005629782	0.299	0.519	0.4555	0.441	0.000503778	0.880797078	0.952574127	0.880797078	0.103254703	-0.498380759	N
0.746411483	2.531283425	0.00536307	0.005412041	0.005387555	0.005387555	0.089	0.528	0.3085	0.3085	0	0.98201379	0.98201379	0.98201379	0.018315639	-0.765518182	N
0.846846847	2.547247806	0.006567599	0.009538328	0.007494195	0.007773579	0.136	0.482	0.319	0.314	0	0.880797078	0.952574127	0.880797078	0.106819212	-0.585948502	N
0.612244898	1.309275299	0.006148881	0.006409241	0.006279061	0.006279061	0.434	0.547	0.4905	0.4905	0	0.952574127	0.952574127	0.952574127	0.049787068	-0.734046752	N
0.614285714	2.146719003	0.003638256	0.003638256	0.003638256	0.003638256	0.258	0.258	0.258	0.258	0	0.952574127	0.952574127	0.952574127	0.049787068	-0.950212932	N
0.758333333	1.406123945	0.004665319	0.007694733	0.006192455	0.006244481	0.112	0.435	0.2795	0.267583333	0	0.880797078	0.952574127	0.952574127	0.056916086	-0.513472391	N
0.786290323	3.663497736	0.00411482	0.00411482	0.00411482	0.00411482	0.658	0.658	0.658	0.658	0	0.880797078	0.880797078	0.880797078	0.135335283	-0.864664717	N
0.567164179	1.660355091	0.007173169	0.007947106	0.007560138	0.007560138	0.632	1	0.816	0.816	0	0.880797078	0.880797078	0.880797078	0.135335283	-0.648498538	N
0.861607143	1.390173769	0.005524666	0.006535471	0.006126337	0.006062158	0.428	0.507	0.454	0.463	0	0.880797078	0.952574127	0.880797078	0.106819212	-0.595453859	N
0.798283262	5.139175414	0.005968183	0.008011619	0.006727941	0.006826601	0.465	0.58	0.4875	0.51325	0.001622718	0.731058579	0.880797078	0.880797078	0.164403303	-0.476433517	N
0.875	2.975073274	0.005792701	0.007107764	0.006171143	0.006253762	0.351	0.434	0.397	0.3898	0	0.880797078	0.952574127	0.952574127	0.066896711	-0.587237402	N
0.774193548	3.750392879	0.004094301	0.004225588	0.004159945	0.004159945	0.565	0.641	0.603	0.603	0	0.880797078	0.880797078	0.880797078	0.135335283	-0.706634577	N
0.584070796	8.454179913	0.004940504	0.004940504	0.004940504	0.004940504	0.617	0.617	0.617	0.617	0	0.880797078	0.880797078	0.880797078	0.135335283	-0.864664717	N
0.840659341	2.861305703	0.006850179	0.006850179	0.006850179	0.006850179	0.452	0.452	0.452	0.452	0	0.880797078	0.880797078	0.880797078	0.135335283	-0.864664717	N
0.710280374	2.763718081	0.007279705	0.007279705	0.007279705	0.007279705	0.294	0.294	0.294	0.294	0	0.952574127	0.952574127	0.952574127	0.049787068	-0.950212932	N
0.789655172	2.369412646	0.003595244	0.006423519	0.005009381	0.005009381	0.505	0.521	0.513	0.513	0	0.880797078	0.880797078	0.880797078	0.135335283	-0.648498538	N
0.783068783	2.72653982	0.004745006	0.011258581	0.009393896	0.00829927	0.385	0.666	0.556	0.5425	0	0.880797078	0.952574127	0.92414182	0.092561176	-0.526402732	N
0.781954887	1.197378323	0.008130937	0.008130937	0.008130937	0.008130937	0.408	0.408	0.408	0.408	0	0.880797078	0.880797078	0.880797078	0.135335283	-0.864664717	N
0.710526316	2.949859688	0.006760616	0.009110127	0.007359518	0.00774342	0.466	0.507	0.503	0.492	0	0.880797078	0.952574127	0.880797078	0.106819212	-0.621292099	N
0.790513834	4.358591907	0.004836865	0.009396257	0.006478861	0.006687178	0.461	0.648	0.4955	0.5152	0.001156069	0.731058579	0.880797078	0.880797078	0.158589699	-0.465167341	N
0.72	2.736638127	0.006013278	0.009110127	0.006379308	0.006669333	0.128	0.572	0.507	0.46975	0.000908265	0.880797078	0.952574127	0.952574127	0.085432158	-0.491081877	N
0.659482759	3.975821751	0.004225588	0.004225588	0.004225588	0.004225588	0.641	0.641	0.641	0.641	0	0.880797078	0.880797078	0.880797078	0.135335283	-0.864664717	N
0.815533981	2.231807084	0.00419665	0.009174213	0.007702083	0.006897192	0.405	0.543	0.484	0.4804	0	0.880797078	0.952574127	0.880797078	0.101115997	-0.535908473	N
0.671296296	2.462459657	0.004483206	0.007694733	0.005394148	0.005741559	0.221	0.58	0.4315	0.416	0	0.731058579	0.952574127	0.880797078	0.172084269	-0.502160182	N
0.876344086	3.037420701	0.005633524	0.006112298	0.005765656	0.00583716	0.466	0.547	0.504	0.505666667	0	0.731058579	0.880797078	0.880797078	0.212850003	-0.550604905	N
0.777777778	3.119419391	0.005633524	0.006112298	0.005765656	0.00583716	0.466	0.547	0.504	0.505666667	0	0.731058579	0.880797078	0.880797078	0.212850003	-0.550604905	N
0.613333333	1.877527015	0.006535471	0.009110127	0.006826358	0.007318418	0.466	0.507	0.503	0.4942	0	0.880797078	0.952574127	0.880797078	0.101115997	-0.54983122	N
0.638190955	3.093971788	0.006642874	0.007702083	0.007065283	0.007136747	0.458	0.685	0.565	0.569333333	0	0.880797078	0.880797078	0.880797078	0.135335283	-0.576443145	N
0.667820069	2.050532569	0.005633524	0.006665141	0.005765656	0.00602144	0.504	0.648	0.547	0.566333333	0	0.731058579	0.880797078	0.880797078	0.212850003	-0.524766665	N
0.740740741	4.192522671	0.006837653	0.058448686	0.01193562	0.016396469	0.16	0.834	0.5205	0.486833333	0	0.880797078	0.880797078	0.880797078	0.135335283	-0.288221572	N
0.682730924	3.702712801	0.004757832	0.0236303	0.011413233	0.01280365	0.296	0.672	0.3695	0.42675	0	0.880797078	0.880797078	0.880797078	0.135335283	-0.432332358	N
0.810679612	5.121696723	0.006837653	0.058448686	0.01193562	0.016396469	0.16	0.834	0.5205	0.486833333	0	0.880797078	0.880797078	0.880797078	0.135335283	-0.288221572	N
0.772727273	2.712062106	0.006652057	0.030458055	0.016003851	0.016651278	0.374	0.646	0.466	0.485625	0	0.880797078	0.952574127	0.880797078	0.124641756	-0.324249269	N
0.677419355	2.88180738	0.013173721	0.014392442	0.013783082	0.013783082	0.41	0.571	0.4905	0.4905	0.125	0.880797078	0.952574127	0.92414182	0.092561176	-0.691272645	N
0.703196347	3.644800132	0.006227764	0.018937452	0.010329896	0.011040583	0.107	0.482	0.2915	0.2906	0.055555556	0.880797078	0.952574127	0.880797078	0.109670819	-0.300567044	N
0.760368664	3.104976709	0.010665045	0.019671675	0.014434931	0.014801646	0.351	0.55	0.414	0.43225	0	0.880797078	0.952574127	0.880797078	0.11394823	-0.511855452	N
0.821917808	3.040773718	0.008451248	0.017048636	0.010289297	0.011519619	0.448	0.554	0.531	0.516	0	0.880797078	0.880797078	0.880797078	0.135335283	-0.432332358	N
0.69955157	4.88687475	0.006772766	0.013596634	0.009901445	0.010066541	0.342	0.536	0.4815	0.4461875	0	0.731058579	0.880797078	0.880797078	0.149869293	-0.281108231	N
0.655021834	1.87871469	0.012075524	0.021159638	0.016617581	0.016617581	0.102	0.102	0.102	0.102	0.25	0.952574127	0.952574127	0.952574127	0.049787068	-0.734046752	N
0.732394366	3.209821627	0.008360044	0.013844075	0.011865155	0.011483607	0.134	0.533	0.285	0.30925	0	0.880797078	0.952574127	0.880797078	0.11394823	-0.453719412	N
0.776536313	4.253265566	0.011309646	0.014289356	0.012582315	0.012690908	0.147	0.505	0.27	0.298	0	0.880797078	0.952574127	0.880797078	0.11394823	-0.511855452	N
0.784753363	3.312572924	0.012449064	0.016073609	0.014261336	0.014261336	0.378	0.502	0.44	0.44	0	0.880797078	0.880797078	0.880797078	0.135335283	-0.648498538	N
0.743119266	3.48140292	0.008988342	0.012470819	0.01072958	0.01072958	0.371	0.633	0.502	0.502	0	0.880797078	0.880797078	0.880797078	0.135335283	-0.648498538	N
0.994413408	2.78458341	0.006653295	0.012460802	0.008646376	0.009101712	0.42	0.543	0.5095	0.4955	0	0.880797078	0.880797078	0.880797078	0.135335283	-0.490468398	N
0.776649746	3.703762697	0.008170178	0.012136646	0.010153412	0.010153412	0.473	0.503	0.488	0.488	0	0.731058579	0.731058579	0.731058579	0.367879441	-0.41595438	N
0.774193548	3.834327216	0.013667807	0.013937367	0.013802587	0.013802587	0.109	0.118	0.1135	0.1135	0.25	0.880797078	0.880797078	0.880797078	0.135335283	-0.648498538	N
0.786407767	3.814443541	0.008170178	0.058448686	0.014562793	0.023936112	0.428	0.834	0.488	0.5595	0	0.731058579	0.880797078	0.817574476	0.251607362	-0.316060279	N
0.399159664	3.200520239	0.007239893	0.01861831	0.011204775	0.011477618	0.044	1	0.36	0.3951	0.025	0.880797078	0.952574127	0.880797078	0.101115997	-0.311579774	N
0.693877551	3.258724666	0.009265421	0.046030681	0.015873465	0.021760758	0.359	0.733	0.5095	0.52775	0	0.731058579	0.952574127	0.880797078	0.172084269	-0.395583373	N
0.675799087	0.582467204	0.007007291	1	0.01584118	0.215157263	0.342	1	0.4715	0.5989	0.05	0.5	0.952574127	0.880797078	0.299713405	-0.1348326	N
0.772727273	2.013829757	0.007109489	0.010249198	0.008679343	0.008679343	0.314	0.388	0.351	0.351	0	0.880797078	0.880797078	0.880797078	0.135335283	-0.648498538	N
0.752252252	4.81808916	0.00745447	0.073751164	0.011813243	0.018124787	0.168	0.811	0.48	0.4995	0	0.731058579	0.880797078	0.880797078	0.158589699	-0.262268592	N
0.736641221	4.62677559	0.010734353	0.019251492	0.014992923	0.014992923	0.21	0.21	0.21	0.21	0	0.880797078	0.880797078	0.880797078	0.135335283	-0.648498538	N
0.804469274	5.29499721	0.01698894	0.058448686	0.037718813	0.037718813	0.428	0.834	0.631	0.631	0	0.880797078	0.880797078	0.880797078	0.135335283	-0.648498538	N
0.729468599	2.279709154	0.01698894	0.058448686	0.037718813	0.037718813	0.428	0.834	0.631	0.631	0	0.880797078	0.880797078	0.880797078	0.135335283	-0.648498538	N
0.759433962	4.2779108	0.005164193	0.019826658	0.012171013	0.012471675	0.046	1	0.374	0.37096875	0.032828283	0.880797078	0.98201379	0.880797078	0.094251075	-0.256442197	N
0.826923077	4.09910774	0.006470569	0.009377472	0.007924021	0.007924021	0.053	0.059	0.056	0.056	0	0.952574127	0.952574127	0.952574127	0.049787068	-0.734046752	N
0.787234043	2.848357393	0.007109489	0.010249198	0.008679343	0.008679343	0.314	0.388	0.351	0.351	0	0.880797078	0.880797078	0.880797078	0.135335283	-0.648498538	N
0.776119403	3.208400535	0.00968922	0.010972433	0.010330826	0.010330826	0.336	0.493	0.4145	0.4145	0.052631579	0.880797078	0.880797078	0.880797078	0.135335283	-0.648498538	N
0.67699115	4.583593709	0.006024428	0.009375798	0.007700113	0.007700113	0.454	0.474	0.464	0.464	0	0.880797078	0.880797078	0.880797078	0.135335283	-0.648498538	N
0.706827309	3.736618569	0.00781775	0.01078803	0.0093774	0.009340145	0.307	0.461	0.3765	0.38025	0	0.880797078	0.880797078	0.880797078	0.135335283	-0.410945305	N
0.707692308	3.33067709	0.007957924	0.021801128	0.013713172	0.013442029	0.109	0.524	0.396	0.391136364	0.04519774	0.880797078	0.952574127	0.880797078	0.096449731	-0.269336871	N
0.709251101	4.804110782	0.009973863	0.015637272	0.013719251	0.013382344	0.18	0.398	0.3405	0.318375	0	0.880797078	0.952574127	0.952574127	0.081867649	-0.367023376	N
0.803846154	3.229644707	0.010279092	0.080026247	0.017471563	0.035239452	0.07	0.869	0.477	0.547214286	0	0.731058579	0.880797078	0.880797078	0.185166174	-0.269063364	N
0.705645161	5.915904797	0.008170178	0.012136646	0.00954608	0.009849746	0.428	0.551	0.488	0.48875	0	0.731058579	0.880797078	0.817574476	0.251607362	-0.374196319	N
0.736842105	4.006766994	0.009990509	0.019826658	0.012726761	0.013480681	0.117	0.524	0.3915	0.383208333	0.027607362	0.880797078	0.952574127	0.880797078	0.108115397	-0.271287147	N
0.666666667	3.448113089	0.01365278	0.098411451	0.056032116	0.056032116	0.492	0.813	0.6525	0.6525	0	0.880797078	0.880797078	0.880797078	0.135335283	-0.648498538	N
0.716475096	1.639633931	0.011457618	0.0185249	0.013911409	0.01458829	0.336	0.464	0.4055	0.399333333	0.214285714	0.880797078	0.952574127	0.880797078	0.121077247	-0.426211481	N
0.855769231	3.841946191	0.011309646	0.014289356	0.012582315	0.012690908	0.147	0.505	0.27	0.298	0	0.880797078	0.952574127	0.880797078	0.11394823	-0.511855452	N
0.685714286	0.904378255	0.012399139	1	0.506199569	0.506199569	0.409	1	0.7045	0.7045	0.5	0.5	0.880797078	0.731058579	0.567667642	-0.216166179	N
0.772727273	2.936013781	0.009457134	0.049544036	0.011523533	0.015608272	0.066	0.806	0.082	0.1884	0	0.880797078	0.952574127	0.92414182	0.092561176	-0.453719412	N
0.678571429	1.780151996	0.011457618	0.0185249	0.013911409	0.01458829	0.336	0.464	0.4055	0.399333333	0.214285714	0.880797078	0.952574127	0.880797078	0.121077247	-0.426211481	N
0.817375887	3.539936111	0.007957924	0.030062306	0.013704039	0.014712625	0.316	0.86	0.472	0.49675	0.008	0.731058579	0.952574127	0.880797078	0.133326909	-0.238202764	N
0.811965812	2.828832209	0.007109489	0.015578645	0.011157455	0.011861699	0.314	0.491	0.3705	0.3848	0.020833333	0.880797078	0.952574127	0.880797078	0.109670819	-0.304343615	N
0.703389831	1.838415936	0.011457618	0.0185249	0.015590354	0.015331362	0.336	0.569	0.4155	0.427	0.181818182	0.880797078	0.952574127	0.880797078	0.106819212	-0.414631277	N
0.785714286	3.224005612	0.006696473	0.049544036	0.014135693	0.018686599	0.147	0.806	0.4705	0.4676	0	0.731058579	0.952574127	0.880797078	0.125575437	-0.249138555	N
0.80952381	1.675728193	0.007619534	0.098411451	0.013664806	0.01973955	0.09	0.832	0.449	0.438571429	0.027777778	0.731058579	0.952574127	0.880797078	0.13361382	-0.278665715	N
0.746411483	0.832061501	0.012399139	1	0.506199569	0.506199569	0.409	1	0.7045	0.7045	0.5	0.5	0.880797078	0.731058579	0.567667642	0	N
0.74796748	3.191689773	0.006043342	0.03207389	0.008402707	0.011894512	0	0	0	0	0	0.731058579	0.952574127	0.880797078	0.138447553	-0.259597496	N
0.820512821	3.607048439	0.010586439	0.023024492	0.014860965	0.015637607	0.33	0.531	0.425	0.432	0	0.880797078	0.952574127	0.92414182	0.092561176	-0.384040358	N
0.755274262	4.858975553	0.010685908	0.019975599	0.01520823	0.015051847	0	0	0	0	0	0.880797078	0.952574127	0.92414182	0.092561176	-0.475106466	N
0.691588785	4.598007564	0.009669836	0.021973319	0.014420183	0.015252206	0.128	0.552	0.2965	0.294	0	0.880797078	0.880797078	0.880797078	0.135335283	-0.360276965	N
0.626086957	3.283877282	0.00806151	0.012573983	0.010618585	0.010631054	0.066	0.466	0.0805	0.189333333	0	0.880797078	0.880797078	0.880797078	0.135335283	-0.648498538	N
0.748917749	3.258110347	0.005787155	0.016550127	0.008942247	0.009340029	0.088	0.495	0.313	0.3004375	0	0.880797078	0.98201379	0.880797078	0.095940975	-0.297663624	N
0.719367589	2.358679955	0.007055011	0.023911405	0.012572385	0.013036231	0.037	0.515	0.405	0.373428571	0.047619048	0.880797078	0.952574127	0.880797078	0.099690194	-0.324904085	N
0.706624606	3.196332034	0.007461127	0.011323668	0.009810461	0.009698428	0.384	0.567	0.4675	0.467833333	0	0.880797078	0.880797078	0.880797078	0.135335283	-0.437791685	N
0.682730924	4.001010192	0.008749915	0.019090135	0.012245393	0.012930433	0.053	0.487	0.092	0.185166667	0.125	0.880797078	0.952574127	0.952574127	0.071174122	-0.475106466	N
0.790378007	2.705062449	0.008451248	0.008841504	0.008646376	0.008646376	0.519	0.543	0.531	0.531	0	0.880797078	0.880797078	0.880797078	0.135335283	-0.648498538	N
0.8	3.472378208	0.008578794	0.014957618	0.010438186	0.011103196	0.035	0.811	0.2515	0.33725	0	0.731058579	0.880797078	0.880797078	0.193471323	-0.374196319	N
0.652509653	3.728558266	0.010486897	0.019826658	0.013610383	0.013899292	0.36	0.515	0.4355	0.435	0.053571429	0.880797078	0.952574127	0.952574127	0.064045104	-0.483243624	N
0.700787402	3.690661621	0.00806151	0.025164428	0.013001983	0.013574648	0.106	0.563	0.402	0.375071429	0.133333333	0.880797078	0.98201379	0.92414182	0.088065257	-0.302665534	N
0.778688525	4.088862794	0.007299685	0.018531152	0.009486258	0.010724006	0.206	0.563	0.3735	0.3725	0	0.880797078	0.952574127	0.92414182	0.092561176	-0.371038176	N
0.644927536	2.222506932	0.010856266	0.10769925	0.016395372	0.030654441	0.317	0.834	0.494	0.552916667	0.020408163	0.880797078	0.952574127	0.880797078	0.126780462	-0.313645381	N
0.794979079	3.307259152	0.00806151	0.020603521	0.013056839	0.013694677	0.282	0.466	0.3555	0.36475	0.5	0.880797078	0.952574127	0.92414182	0.092561176	-0.453719412	N
0.75	3.68294607	0.010311374	0.020768548	0.014540506	0.014393567	0.352	0.571	0.4805	0.4554375	0.026415094	0.880797078	0.952574127	0.880797078	0.103254703	-0.301158594	N
0.756906077	2.631560111	0.005778111	0.241147477	0.012473558	0.021817194	0.044	0.814	0.403	0.362923077	0	0.731058579	0.952574127	0.880797078	0.123610452	-0.236087048	N
0.717821782	2.96705775	0.008136356	0.037156155	0.019013157	0.022003367	0.333	0.624	0.4165	0.462166667	0	0.880797078	0.952574127	0.880797078	0.106819212	-0.369782323	N
0.723300971	4.412235852	0.010259731	0.014148702	0.012204216	0.012204216	0.216	0.245	0.2305	0.2305	0.142857143	0.880797078	0.952574127	0.92414182	0.092561176	-0.691272645	N
0.790513834	2.820622789	0.010734353	0.020254522	0.015119468	0.015241081	0.068	0.499	0.21	0.237333333	0	0.880797078	0.880797078	0.880797078	0.135335283	-0.360276965	N
0.909547739	1.877237364	0.011457618	0.0185249	0.013911409	0.01458829	0.336	0.464	0.4055	0.399333333	0.214285714	0.880797078	0.952574127	0.880797078	0.121077247	-0.426211481	N
0.702830189	9.892144136	0.010400061	0.016305475	0.01321557	0.013284169	0.128	0.339	0.2205	0.227	0.2	0.880797078	0.880797078	0.880797078	0.135335283	-0.648498538	N
0.673728814	2.385607597	0.019686036	0.060039855	0.039862946	0.039862946	0.414	0.77	0.592	0.592	0	0.880797078	0.880797078	0.880797078	0.135335283	-0.648498538	N
0.733333333	1.404515227	0.011457618	0.0185249	0.013911409	0.01458829	0.336	0.464	0.4055	0.399333333	0.214285714	0.880797078	0.952574127	0.880797078	0.121077247	-0.426211481	N
0.694063927	3.254762634	0.011552296	0.019280493	0.015416394	0.015416394	0.203	0.279	0.241	0.241	0	0.952574127	0.952574127	0.952574127	0.049787068	-0.734046752	N
0.660377358	3.449084259	0.008310413	0.0157402	0.011065501	0.01174591	0.067	0.453	0.204	0.233125	0	0.952574127	0.98201379	0.952574127	0.039296592	-0.420805934	N
0.719033233	3.597435632	0.008671365	0.013501155	0.011539977	0.011260854	0.343	0.716	0.486	0.4825	0	0.880797078	0.952574127	0.880797078	0.106819212	-0.440469516	N
0.699604743	3.388992723	0.007052908	0.0185249	0.013280995	0.013164393	0.316	0.464	0.3725	0.386875	0.166666667	0.880797078	0.952574127	0.880797078	0.124641756	-0.364010815	N
0.688034188	2.687930537	0.007052908	0.010732498	0.008892703	0.008892703	0.316	0.383	0.3495	0.3495	0	0.880797078	0.880797078	0.880797078	0.135335283	-0.648498538	N
0.744019139	0.844963514	0.012399139	1	0.506199569	0.506199569	0.409	1	0.7045	0.7045	0.5	0.5	0.880797078	0.731058579	0.567667642	-0.216166179	N
0.831683168	3.517111683	0.008578794	0.020715019	0.012887245	0.013767076	0.035	0.263	0.118	0.1335	0	0.731058579	0.952574127	0.880797078	0.172084269	-0.374196319	N
0.718367347	2.150333934	0.007109489	0.013946261	0.01021618	0.010372027	0.314	0.551	0.3775	0.405	0	0.880797078	0.952574127	0.92414182	0.092561176	-0.475106466	N
0.736318408	4.521561848	0.012371205	0.016610662	0.014490933	0.014490933	0.358	0.489	0.4235	0.4235	0.066666667	0.880797078	0.880797078	0.880797078	0.135335283	-0.648498538	N
0.733333333	4.000739937	0.007957924	0.019826658	0.013534943	0.013444604	0.089	0.504	0.36	0.353166667	0.048387097	0.880797078	0.952574127	0.92414182	0.092561176	-0.332918096	N
0.663716814	2.958727536	0.009982093	0.021801128	0.013387472	0.013418398	0.109	0.518	0.371	0.376736842	0.02422611	0.880797078	0.952574127	0.952574127	0.085807369	-0.261351239	N
0.772486772	5.487232205	0.010997911	0.020489683	0.012559116	0.014151457	0.328	0.515	0.3975	0.4095	0.125	0.880797078	0.98201379	0.952574127	0.076825461	-0.461587269	N
0.77689243	3.730790189	0.012371205	0.016610662	0.014819045	0.014654989	0.358	0.798	0.473	0.5255	0.014084507	0.731058579	0.880797078	0.880797078	0.193471323	-0.374196319	N
0.765799257	4.581635456	0.007031668	0.015879045	0.010212618	0.010591381	0.323	0.617	0.4385	0.45235	0	0.731058579	0.880797078	0.880797078	0.146962491	-0.257073973	N
0.777777778	2.059727617	0.013851532	0.025071041	0.015205302	0.016612427	0.244	0.593	0.386	0.411	0	0.880797078	0.952574127	0.880797078	0.121077247	-0.400373241	N
0.600896861	1.732986059	0.010734353	0.014934491	0.012834422	0.012834422	0.223	0.229	0.226	0.226	0	0.880797078	0.880797078	0.880797078	0.135335283	-0.648498538	N
0.700348432	3.932113318	0.008749915	0.018599261	0.012503924	0.013089256	0.053	0.462	0.195	0.22625	0	0.952574127	0.952574127	0.952574127	0.049787068	-0.488625662	N
0.681415929	3.16095455	0.009990509	0.025717962	0.014624735	0.015569824	0.138	0.599	0.3855	0.353166667	0	0.880797078	0.880797078	0.880797078	0.135335283	-0.432332358	N
0.683982684	1.989317625	0.009711586	0.143735105	0.016219246	0.031945947	0.069	0.834	0.494	0.508388889	0.016393443	0.731058579	0.952574127	0.880797078	0.145834993	-0.281173785	N
0.710526316	0.533447136	0.010604567	1	0.013747569	0.260483355	0	0	0	0	0.090909091	0.5	0.952574127	0.880797078	0.40929882	-0.076808072	N
0.678714859	2.127158895	0.01365278	0.098411451	0.056032116	0.056032116	0.492	0.813	0.6525	0.6525	0	0.880797078	0.880797078	0.880797078	0.135335283	-0.648498538	N
0.797101449	2.855873184	0.008749915	0.021839995	0.012503924	0.014631388	0.053	0.493	0.338	0.31975	0	0.880797078	0.952574127	0.952574127	0.060480595	-0.370403175	N
0.719626168	1.644377014	0.010430529	0.017673245	0.013644101	0.013847994	0.371	0.491	0.431	0.431	0.057142857	0.880797078	0.880797078	0.880797078	0.135335283	-0.432332358	N
0.771784232	1.270069269	0.019686036	0.060039855	0.039862946	0.039862946	0.414	0.77	0.592	0.592	0	0.880797078	0.880797078	0.880797078	0.135335283	-0.648498538	N
0.706521739	5.394879018	0.011053748	0.058448686	0.017141319	0.022586869	0.128	0.834	0.392	0.392166667	0	0.880797078	0.880797078	0.880797078	0.135335283	-0.432332358	N
0.752380952	3.96176896	0.009982093	0.017285032	0.012594672	0.012897765	0.332	0.518	0.4075	0.4137	0.060240964	0.880797078	0.952574127	0.952574127	0.084006354	-0.343695794	N
0.799107143	2.125535971	0.005416669	0.241147477	0.012417024	0.022844647	0.041	0.814	0.4105	0.40345	0	0.731058579	0.952574127	0.880797078	0.117020616	-0.252349381	N
0.684563758	1.668630952	0.007109489	0.015578645	0.011157455	0.011250761	0.314	0.491	0.3655	0.384	0.090909091	0.880797078	0.952574127	0.92414182	0.092561176	-0.453719412	N
0.733333333	3.609730895	0.006803362	0.060039855	0.016843978	0.022550995	0.094	0.77	0.403	0.3769	0	0.731058579	0.952574127	0.880797078	0.150034878	-0.297234823	N
0.666666667	3.85399996	0.007575318	0.01162765	0.010211193	0.009906339	0.371	1	0.743	0.71425	0	0.880797078	0.880797078	0.880797078	0.135335283	-0.432332358	N
0.837563452	3.381540375	0.009453883	0.01780603	0.012361319	0.01301182	0.059	1	0.3225	0.4131	0.09375	0.880797078	0.952574127	0.880797078	0.103254703	-0.340289559	N
0.671814672	4.159251515	0.007809114	0.011883227	0.00984617	0.00984617	0.268	0.301	0.2845	0.2845	0	0.880797078	0.880797078	0.880797078	0.135335283	-0.648498538	N
0.80952381	3.7066245	0.011407638	0.014465954	0.012936796	0.012936796	0.457	0.524	0.4905	0.4905	0.333333333	0.880797078	0.880797078	0.880797078	0.135335283	-0.648498538	N
0.72	2.447300893	0.00632655	0.021801128	0.012859348	0.012868323	0.305	1	0.4275	0.448928571	0.046413502	0.880797078	0.952574127	0.880797078	0.101727056	-0.259714313	N
0.745192308	4.004306912	0.009127359	0.015193522	0.012815346	0.012487893	0.437	0.811	0.5045	0.56425	0	0.880797078	0.880797078	0.880797078	0.135335283	-0.432332358	N
0.756756757	3.172820045	0.009036665	0.021307258	0.013001802	0.013115742	0.445	0.611	0.533	0.5206	0	0.731058579	0.880797078	0.880797078	0.205098531	-0.260774702	N
0.75	2.39494329	0.010734353	0.019251492	0.014992923	0.014992923	0.21	0.21	0.21	0.21	0	0.880797078	0.880797078	0.880797078	0.135335283	-0.648498538	N
0.72826087	2.400177665	0.008973828	0.0153268	0.011737473	0.011943893	0.51	0.602	0.555	0.5555	0	0.731058579	0.880797078	0.880797078	0.193471323	-0.432332358	N
0.773755656	3.189993477	0.008360044	0.013844075	0.011865155	0.011483607	0.134	0.533	0.285	0.30925	0	0.880797078	0.952574127	0.880797078	0.11394823	-0.453719412	N
0.659836066	3.399687082	0.006470569	0.028641658	0.013905311	0.014661109	0.053	0.602	0.3225	0.300038462	0.026455026	0.731058579	0.952574127	0.952574127	0.091634234	-0.264266386	N
0.705882353	1.501844697	0.010268197	0.018253159	0.013716992	0.01397447	0.102	0.524	0.102	0.18625	0.078431373	0.880797078	0.952574127	0.952574127	0.071174122	-0.381557386	N
0.778894472	2.938515234	0.010093678	0.028641658	0.014145798	0.016430938	0.332	0.602	0.4505	0.455	0.020833333	0.731058579	0.952574127	0.880797078	0.145576571	-0.375873917	N
0.671586716	2.567595869	0.009291093	0.009769091	0.009530092	0.009530092	0.461	0.466	0.4635	0.4635	0	0.880797078	0.880797078	0.880797078	0.135335283	-0.648498538	N
0.666666667	3.950460737	0.007108374	0.02189637	0.011737714	0.012814875	0.088	1	0.474	0.532071429	0.024	0.731058579	0.952574127	0.880797078	0.122253378	-0.24325193	N
0.753303965	1.417987121	0.007109489	0.017661311	0.013285213	0.012835307	0.314	0.593	0.3925	0.423	0	0.880797078	0.952574127	0.92414182	0.092561176	-0.453719412	N
0.689243028	2.903064331	0.009457134	0.0157402	0.013043627	0.01283312	0.082	0.527	0.36	0.3471	0	0.880797078	0.952574127	0.952574127	0.07830314	-0.388793037	N
0.770833333	3.740348227	0.008527111	0.0236303	0.012130568	0.014019287	0.092	0.374	0.2225	0.231125	0	0.880797078	0.880797078	0.880797078	0.135335283	-0.338783279	N
0.738738739	1.965303043	0.011457618	0.023784478	0.015492616	0.016002778	0.336	0.497	0.4055	0.404875	0.157894737	0.880797078	0.952574127	0.880797078	0.11394823	-0.364010815	N
0.769811321	1.396518594	0.009294774	0.012282925	0.01078885	0.01078885	0.399	0.537	0.468	0.468	0	0.880797078	0.880797078	0.880797078	0.135335283	-0.648498538	N
0.757281553	3.279086065	0.009826927	0.021552957	0.012719492	0.013753155	0.393	1	0.545	0.631625	0	0.880797078	0.880797078	0.880797078	0.135335283	-0.313555742	N
0.779487179	2.496981784	0.005778111	0.012940944	0.008585466	0.009092777	0.044	0.48	0.335	0.290571429	0	0.880797078	0.952574127	0.880797078	0.104782349	-0.278619945	N
0.719457014	6.02709115	0.012371205	0.046030681	0.015309877	0.02225541	0.358	0.733	0.488	0.51675	0.043478261	0.731058579	0.880797078	0.880797078	0.193471323	-0.374196319	N
0.868020305	4.288812074	0.014174548	0.017394829	0.015784689	0.015784689	0.357	0.533	0.445	0.445	0	0.952574127	0.952574127	0.952574127	0.049787068	-0.734046752	N
0.834532374	3.64957344	0.013667807	0.073751164	0.015709999	0.025229782	0.108	0.787	0.117	0.234333333	0.285714286	0.880797078	0.952574127	0.880797078	0.106819212	-0.369782323	N
0.731707317	3.388883198	0.016029682	0.0236303	0.019829991	0.019829991	0.296	0.329	0.3125	0.3125	0	0.880797078	0.880797078	0.880797078	0.135335283	-0.648498538	N
0.693877551	4.266600182	0.011457618	0.0185249	0.013911409	0.014451334	0.336	0.464	0.4055	0.40275	0.222222222	0.880797078	0.952574127	0.880797078	0.11394823	-0.511855452	N
0.672794118	4.267678946	0.008262629	0.013411569	0.010478718	0.010657908	0.349	0.512	0.4245	0.4275	0	0.880797078	0.98201379	0.92414182	0.084693318	-0.482974323	N
0.736641221	2.664283811	0.00745447	0.01134356	0.008714576	0.009056796	0.338	0.561	0.4355	0.4425	0	0.880797078	0.952574127	0.880797078	0.11394823	-0.453719412	N
0.739910314	4.956436098	0.007315423	0.014658085	0.010212618	0.010173971	0.354	0.548	0.455	0.450916667	0	0.731058579	0.880797078	0.880797078	0.154713963	-0.288221572	N
0.706730769	2.823649053	0.011403152	0.013120046	0.012261599	0.012261599	0.332	0.452	0.392	0.392	0	0.952574127	0.952574127	0.952574127	0.049787068	-0.734046752	N
0.751152074	2.29851684	0.005164193	0.02330638	0.011331973	0.012197464	0.046	0.529	0.3305	0.281388889	0.022727273	0.880797078	0.952574127	0.952574127	0.083055819	-0.284300055	N
0.740384615	2.254181288	0.009529376	0.080026247	0.016996622	0.025634088	0.148	0.869	0.415	0.444694444	0	0.731058579	0.952574127	0.880797078	0.135776842	-0.237492685	N
0.74796748	2.98275339	0.010486897	0.019826658	0.013610383	0.013899292	0.36	0.515	0.4355	0.435	0.053571429	0.880797078	0.952574127	0.952574127	0.064045104	-0.483243624	N
0.793269231	4.266929149	0.012371205	0.016610662	0.014490933	0.014490933	0.358	0.489	0.4235	0.4235	0.066666667	0.880797078	0.880797078	0.880797078	0.135335283	-0.648498538	N
0.752066116	1.87249772	0.010430529	0.017673245	0.013644101	0.013847994	0.371	0.491	0.431	0.431	0.057142857	0.880797078	0.880797078	0.880797078	0.135335283	-0.432332358	N
0.732758621	3.479489006	0.021662527	0.021976092	0.02181931	0.02181931	0.444	0.542	0.493	0.493	0	0.880797078	0.880797078	0.880797078	0.135335283	-0.648498538	N
0.71372549	4.718094627	0.012965395	0.098411451	0.014095192	0.034891807	0.487	0.813	0.527	0.5885	0	0.880797078	0.952574127	0.880797078	0.11394823	-0.453719412	N
0.711111111	3.671978624	0.011248654	0.01664174	0.012936796	0.013440997	0.361	0.524	0.4715	0.457	0.090909091	0.880797078	0.880797078	0.880797078	0.135335283	-0.403077447	N
0.75	2.537375553	0.010430529	0.017673245	0.013644101	0.013847994	0.371	0.491	0.431	0.431	0.057142857	0.880797078	0.880797078	0.880797078	0.135335283	-0.432332358	N
0.730612245	3.598932742	0.012371205	0.016610662	0.014490933	0.014490933	0.358	0.489	0.4235	0.4235	0.066666667	0.880797078	0.880797078	0.880797078	0.135335283	-0.648498538	N
0.760869565	3.257075722	0.010430529	0.020363965	0.015717421	0.01499104	0.347	0.491	0.4165	0.4189	0.049019608	0.880797078	0.952574127	0.880797078	0.109670819	-0.325110219	N
0.791666667	2.785204185	0.007109489	0.010249198	0.008679343	0.008679343	0.314	0.388	0.351	0.351	0	0.880797078	0.880797078	0.880797078	0.135335283	-0.648498538	N
0.721461187	2.376514601	0.011457618	0.0185249	0.013911409	0.01458829	0.336	0.464	0.4055	0.399333333	0.214285714	0.880797078	0.952574127	0.880797078	0.121077247	-0.426211481	N
0.693877551	3.492853184	0.00806151	0.221875183	0.014235869	0.039232863	0.168	0.834	0.3995	0.437833333	0	0.731058579	0.880797078	0.880797078	0.158589699	-0.275956306	N
0.66509434	2.700897748	0.013680921	0.015191826	0.014436374	0.014436374	0.089	0.099	0.094	0.094	0.5	1	0				N
0.677272727	1.472381217	0.009294774	0.012282925	0.01078885	0.01078885	0.399	0.537	0.468	0.468	0	0.880797078	0.880797078	0.880797078	0.135335283	-0.648498538	N
0.793814433	9.02578668	0.011062296	0.016290614	0.012724798	0.013126973	0.272	0.488	0.367	0.378333333	0.107142857	0.880797078	0.952574127	0.880797078	0.106819212	-0.388793037	N
0.715753425	4.33125098	0.010710448	0.016792108	0.013751278	0.013751278	0.387	0.517	0.452	0.452	0	0.880797078	0.880797078	0.880797078	0.135335283	-0.648498538	N
0.804761905	3.231570707	0.008386783	0.013888355	0.011137569	0.011137569	0.523	0.62	0.5715	0.5715	0	0.880797078	0.880797078	0.880797078	0.135335283	-0.648498538	N
0.725409836	5.566035176	0.010665045	0.019671675	0.01516836	0.01516836	0.351	0.55	0.4505	0.4505	0	0.880797078	0.952574127	0.92414182	0.092561176	-0.691272645	N
0.734693878	3.212419668	0.00886066	0.01222911	0.010544885	0.010544885	0.044	0.049	0.0465	0.0465	0	0.880797078	0.952574127	0.92414182	0.092561176	-0.691272645	N
0.714285714	3.163648365	0.007031668	0.012984614	0.009899048	0.009763767	0.323	0.548	0.4385	0.439875	0	0.880797078	0.880797078	0.880797078	0.135335283	-0.284741734	N
0.882051282	3.699744175	0.007093018	0.017796759	0.01146509	0.011481066	0.331	0.605	0.4675	0.4676	0	0.731058579	0.952574127	0.880797078	0.173289293	-0.283282173	N
0.745762712	2.186263221	0.008451248	0.008841504	0.008646376	0.008646376	0.519	0.543	0.531	0.531	0	0.880797078	0.880797078	0.880797078	0.135335283	-0.648498538	N
0.706896552	2.048695108	0.010489713	0.021801128	0.014439041	0.014199488	0.249	0.434	0.331	0.3487	0.040650407	0.880797078	0.952574127	0.952574127	0.066896711	-0.371071223	N
0.834101382	2.690790175	0.008988342	0.021461401	0.016739351	0.016104909	0.371	0.633	0.4965	0.49925	0	0.880797078	0.880797078	0.880797078	0.135335283	-0.432332358	N
0.755555556	0.620427496	0.00745447	0.015861855	0.009803027	0.010418787	0.338	0.561	0.48	0.462	0	0.731058579	0.952574127	0.880797078	0.159834607	-0.335777641	N
0.742738589	3.417377639	0.008578794	0.011749012	0.010163903	0.010163903	0.035	0.039	0.037	0.037	0	0.731058579	0.880797078	0.817574476	0.251607362	-0.532226459	N
0.772277228	4.444383253	0.010734353	0.014934491	0.012834422	0.012834422	0.223	0.229	0.226	0.226	0	0.880797078	0.880797078	0.880797078	0.135335283	-0.648498538	N
0.736842105	3.583028177	0.013667807	0.013937367	0.013802587	0.013802587	0.109	0.118	0.1135	0.1135	0.25	0.880797078	0.880797078	0.880797078	0.135335283	-0.648498538	N
0.697674419	2.984799285	0.010705814	0.020363965	0.016811309	0.016576321	0.204	0.487	0.2795	0.311125	0.061538462	0.880797078	0.98201379	0.952574127	0.067240193	-0.417939134	N
0.70995671	1.113379492	0.009812397	1	0.014057348	0.098489366	0.144	1	0.4575	0.4806	0.03125	0.5	0.98201379	0.880797078	0.183698646	-0.20124386	N
0.82278481	4.656358462	0.008532878	0.015016873	0.011241097	0.011339245	0.34	0.533	0.417	0.43525	0	0.880797078	0.952574127	0.880797078	0.103254703	-0.443533909	N
0.709163347	3.284927795	0.005778111	0.019826658	0.009021612	0.010267934	0.231	0.515	0.373	0.405545455	0.00887574	0.880797078	0.952574127	0.92414182	0.092561176	-0.275854289	N
0.737288136	2.94298869	0.008451248	0.008841504	0.008646376	0.008646376	0.519	0.543	0.531	0.531	0	0.880797078	0.880797078	0.880797078	0.135335283	-0.648498538	N
0.768115942	3.090072378	0.010010213	0.020363965	0.014003411	0.014025101	0.204	0.524	0.393	0.401107143	0.030905077	0.880797078	0.98201379	0.952574127	0.079216023	-0.276598444	N
0.758474576	3.943706329	0.011034745	0.017351433	0.012582315	0.013191635	0.147	0.505	0.372	0.333166667	0	0.880797078	0.952574127	0.92414182	0.092561176	-0.409878598	N
0.788461538	3.749660033	0.010259731	0.014148702	0.012204216	0.012204216	0.216	0.245	0.2305	0.2305	0.142857143	0.880797078	0.952574127	0.92414182	0.092561176	-0.691272645	N
0.765258216	2.846009341	0.010430529	0.017673245	0.014104036	0.014203001	0.355	0.491	0.4165	0.422	0.045454545	0.880797078	0.880797078	0.880797078	0.135335283	-0.376609848	N
0.762430939	2.173028331	0.013065969	0.017328925	0.015492616	0.015288343	0.336	0.569	0.4155	0.427	0.222222222	0.880797078	0.952574127	0.880797078	0.106819212	-0.388793037	N
0.833333333	3.548192057	0.010489713	0.021801128	0.014439041	0.014141036	0.249	0.434	0.331	0.34625	0.050632911	0.880797078	0.952574127	0.952574127	0.071174122	-0.38841043	N
0.732793522	3.16089944	0.010093678	0.019826658	0.013770531	0.013469907	0.109	0.524	0.417	0.370875	0.108108108	0.880797078	0.952574127	0.880797078	0.103254703	-0.345636323	N
0.728448276	6.266147332	0.008988342	0.012470819	0.01072958	0.01072958	0.371	0.633	0.502	0.502	0	0.880797078	0.880797078	0.880797078	0.135335283	-0.648498538	N
0.757201646	3.648388776	0.011923186	0.015756337	0.013839762	0.013839762	0.328	0.427	0.3775	0.3775	0	0.952574127	0.952574127	0.952574127	0.049787068	-0.734046752	N
0.699186992	2.943053403	0.003769827	0.009377472	0.005468152	0.00584045	0.053	0.567	0.365	0.315833333	0	0.880797078	0.952574127	0.880797078	0.106819212	-0.40512592	N
0.742957746	3.116675939	0.007055011	0.008635236	0.007845124	0.007845124	0.439	0.491	0.465	0.465	0	0.880797078	0.880797078	0.880797078	0.135335283	-0.648498538	N
0.682008368	2.761314071	0.00845632	0.016030554	0.011918862	0.012205777	0.105	0.434	0.1945	0.23005	0.027472527	0.880797078	0.952574127	0.92414182	0.092561176	-0.273209571	N
0.869565217	2.845023251	0.006066394	0.008047806	0.0070571	0.0070571	0.259	0.375	0.317	0.317	0	0.880797078	0.952574127	0.92414182	0.092561176	-0.691272645	N
0.696850394	3.010709725	0.007521495	0.046030681	0.011529532	0.01915281	0.234	0.733	0.401	0.44225	0	0.731058579	0.98201379	0.92414182	0.142829358	-0.40345123	N
0.77027027	2.84806291	0.011727705	0.019468577	0.013764839	0.014563778	0.357	0.611	0.499	0.486	0.078431373	0.731058579	0.952574127	0.952574127	0.10726077	-0.320441378	N
0.695121951	2.995210509	0.008851601	0.01751266	0.012903482	0.012905021	0.354	0.556	0.429	0.4325	0	0.731058579	0.880797078	0.817574476	0.251607362	-0.295681366	N
0.761061947	4.338176815	0.008973828	0.014435905	0.012166899	0.011935883	0.456	0.658	0.5405	0.54875	0	0.731058579	0.880797078	0.880797078	0.193471323	-0.374196319	N
0.758928571	2.765436903	0.009294774	0.012282925	0.01078885	0.01078885	0.399	0.537	0.468	0.468	0	0.880797078	0.880797078	0.880797078	0.135335283	-0.648498538	N
0.712962963	3.906695154	0.014501047	0.058448686	0.01993632	0.028205593	0.356	0.834	0.4775	0.53625	0	0.880797078	0.952574127	0.880797078	0.11394823	-0.432332358	N
0.781132075	3.390855161	0.007055011	0.012573983	0.008348373	0.00910408	0.371	0.491	0.4545	0.447	0	0.880797078	0.880797078	0.880797078	0.135335283	-0.360276965	N
0.869565217	1.043676931	0.012399139	1	0.506199569	0.506199569	0.409	1	0.7045	0.7045	0.5	0.5	0.880797078	0.731058579	0.567667642	-0.216166179	N
0.659090909	2.48017506	0.008475784	0.016673361	0.012997625	0.012786099	0.11	0.445	0.2345	0.256	0.166666667	0.880797078	0.952574127	0.92414182	0.092561176	-0.445851555	N
0.782828283	0.923323859	0.011654616	0.242381075	0.056032116	0.100217102	0.488	0.813	0.6575	0.651333333	0	0.731058579	0.880797078	0.880797078	0.174092643	-0.373196085	N
0.755274262	1.432201457	0.011654616	1	0.014095192	0.139443879	0.144	1	0.506	0.5555	0.045454545	0.5	0.952574127	0.880797078	0.236501349	-0.225949955	N
0.891752577	2.860495652	0.009982093	0.021801128	0.013815897	0.013803903	0.109	0.524	0.38	0.383583333	0.021800948	0.880797078	0.98201379	0.952574127	0.081211994	-0.255616989	N
0.732057416	3.378001777	0.008136356	0.012381195	0.010078588	0.010168682	0.125	0.474	0.251	0.27525	0	0.880797078	0.880797078	0.880797078	0.135335283	-0.432332358	N
0.820833333	4.760093297	0.012371205	0.016610662	0.014490933	0.014490933	0.358	0.489	0.4235	0.4235	0.066666667	0.880797078	0.880797078	0.880797078	0.135335283	-0.648498538	N
0.740740741	1.435119634	0.010971996	0.016696223	0.013834109	0.013834109	0.368	0.538	0.453	0.453	0	0.880797078	0.880797078	0.880797078	0.135335283	-0.648498538	N
0.679144385	1.76611107	0.011457618	0.0185249	0.013911409	0.014451334	0.336	0.464	0.4055	0.40275	0.222222222	0.880797078	0.952574127	0.880797078	0.11394823	-0.511855452	N
0.688976378	3.447285465	0.011641984	0.020768548	0.013788085	0.014676951	0.393	1	0.5705	0.673166667	0	0.880797078	0.880797078	0.880797078	0.135335283	-0.360276965	N
0.790178571	4.339361637	0.009955707	0.017104527	0.013736635	0.013633376	0.388	0.528	0.465	0.4615	0	0.880797078	0.880797078	0.880797078	0.135335283	-0.490468398	N
0.67826087	4.49212067	0.007809114	0.011883227	0.00984617	0.00984617	0.268	0.301	0.2845	0.2845	0	0.880797078	0.880797078	0.880797078	0.135335283	-0.648498538	N
0.786407767	3.766121088	0.007957924	0.019428017	0.012836726	0.012810027	0.122	0.533	0.387	0.3574	0	0.880797078	0.952574127	0.880797078	0.11394823	-0.340289559	N
0.720858896	5.144173795	0.006024428	0.009375798	0.007700113	0.007700113	0.454	0.474	0.464	0.464	0	0.880797078	0.880797078	0.880797078	0.135335283	-0.648498538	N
0.723300971	2.875674867	0.011552296	0.019280493	0.015416394	0.015416394	0.203	0.279	0.241	0.241	0	0.952574127	0.952574127	0.952574127	0.049787068	-0.734046752	N
0.691699605	2.718637963	0.014692069	0.023128039	0.018910054	0.018910054	0.657	0.657	0.657	0.657	0	0.952574127	0.952574127	0.952574127	0.049787068	-0.734046752	N
0.825396825	3.26408987	0.00745447	0.015861855	0.010883624	0.011270893	0.338	0.531	0.48	0.45725	0	0.731058579	0.880797078	0.880797078	0.193471323	-0.374196319	N
0.699186992	3.311811025	0.010430529	0.017673245	0.014104036	0.014203001	0.355	0.491	0.4165	0.422	0.045454545	0.880797078	0.880797078	0.880797078	0.135335283	-0.376609848	N
0.824120603	3.47063582	0.008569024	0.024877022	0.013788085	0.014450078	0.354	1	0.5705	0.682	0	0.731058579	0.952574127	0.880797078	0.159834607	-0.254216891	N
0.736363636	2.708873107	0.008451248	0.008841504	0.008646376	0.008646376	0.519	0.543	0.531	0.531	0	0.880797078	0.880797078	0.880797078	0.135335283	-0.648498538	N
0.680327869	3.071923619	0.011354659	0.027605042	0.017558664	0.019129436	0.317	0.602	0.414	0.452333333	0.157894737	0.952574127	0.98201379	0.952574127	0.041919211	-0.58388447	N
0.746268657	2.698820096	0.006291999	0.058448686	0.009995242	0.014795152	0.231	0.834	0.411	0.417375	0	0.731058579	0.952574127	0.880797078	0.123135476	-0.262333807	N
0.755868545	2.543602806	0.007910429	0.01225087	0.009591451	0.00983605	0.067	0.484	0.207	0.24125	0	0.952574127	0.98201379	0.970687769	0.034051354	-0.533616288	N
0.784037559	1.18165679	0.012195455	0.060073869	0.016033864	0.026661984	0.11	0.834	0.343	0.403875	0	0.880797078	0.952574127	0.880797078	0.106819212	-0.369782323	N
0.696682464	2.7921257	0.008262629	0.013411569	0.010478718	0.010657908	0.349	0.512	0.4245	0.4275	0	0.880797078	0.98201379	0.92414182	0.084693318	-0.482974323	N
0.669683258	3.88141503	0.00616624	0.010187523	0.008176882	0.008176882	0.228	0.282	0.255	0.255	0	0.952574127	0.952574127	0.952574127	0.049787068	-0.734046752	N
0.756198347	2.308769424	0.00845632	0.016030554	0.011918862	0.01219182	0.105	0.434	0.266	0.252583333	0.025345622	0.880797078	0.952574127	0.952574127	0.088996667	-0.265225631	N
0.738589212	3.826938074	0.006745005	0.008593081	0.007669043	0.007669043	0.386	0.55	0.468	0.468	0	0.880797078	0.952574127	0.92414182	0.092561176	-0.691272645	N
0.677272727	3.125016546	0.009265421	0.017737838	0.012194323	0.012847976	0.359	1	0.766	0.72275	0	0.880797078	0.952574127	0.92414182	0.092561176	-0.475106466	N
0.811059908	2.707052584	0.007957924	0.020363965	0.012047389	0.013125572	0.316	0.487	0.396	0.395666667	0.066666667	0.880797078	0.952574127	0.92414182	0.092561176	-0.393545716	N
0.795744681	4.831718544	0.008867437	0.022383723	0.013136809	0.013644165	0.341	0.592	0.4495	0.4483125	0	0.731058579	0.952574127	0.880797078	0.15905654	-0.265614101	N
0.81865285	3.351135197	0.010489713	0.021801128	0.014439041	0.014199488	0.249	0.434	0.331	0.3487	0.040650407	0.880797078	0.952574127	0.952574127	0.066896711	-0.371071223	N
0.67816092	2.78073155	0.006653295	0.012460802	0.008646376	0.009101712	0.42	0.543	0.5095	0.4955	0	0.880797078	0.880797078	0.880797078	0.135335283	-0.490468398	N
0.692307692	7.581430008	0.008360044	0.013844075	0.011102059	0.011102059	0.436	0.533	0.4845	0.4845	0	0.880797078	0.880797078	0.880797078	0.135335283	-0.648498538	N
0.843243243	1.26803606	0.019686036	0.060039855	0.039862946	0.039862946	0.414	0.77	0.592	0.592	0	0.880797078	0.880797078	0.880797078	0.135335283	-0.648498538	N
0.765486726	3.763757953	0.011552296	0.019280493	0.015416394	0.015416394	0.203	0.279	0.241	0.241	0	0.952574127	0.952574127	0.952574127	0.049787068	-0.734046752	N
0.812080537	3.880433775	0.007055011	0.012306601	0.010072069	0.009876437	0.336	0.491	0.4595	0.4365	0	0.880797078	0.952574127	0.880797078	0.11394823	-0.453719412	N
0.823232323	3.182808455	0.009351695	0.023557142	0.015757695	0.016192132	0.304	0.571	0.437	0.439916667	0	0.731058579	0.952574127	0.880797078	0.126197891	-0.276599837	N
0.801470588	2.894272852	0.010734353	0.019251492	0.014992923	0.014992923	0.21	0.21	0.21	0.21	0	0.880797078	0.880797078	0.880797078	0.135335283	-0.648498538	N
0.747474747	2.649069551	0.010430529	0.017673245	0.014104036	0.014203001	0.355	0.491	0.4165	0.422	0.045454545	0.880797078	0.880797078	0.880797078	0.135335283	-0.376609848	N
0.768924303	4.60716713	0.00806151	0.221875183	0.014910738	0.042007601	0.348	0.834	0.474	0.5391	0	0.731058579	0.952574127	0.880797078	0.161662085	-0.245928775	N
0.756410256	3.064568713	0.007957924	0.021801128	0.013905311	0.013782393	0.109	0.524	0.396	0.397375	0.036231884	0.880797078	0.952574127	0.880797078	0.096125685	-0.264222171	N
0.702479339	3.040773718	0.008451248	0.008841504	0.008646376	0.008646376	0.519	0.543	0.531	0.531	0	0.880797078	0.880797078	0.880797078	0.135335283	-0.648498538	N
0.845794393	3.021121829	0.008643443	0.021839995	0.011881975	0.013578648	0.307	0.542	0.4335	0.4163	0	0.880797078	0.952574127	0.92414182	0.092561176	-0.328297115	N
0.681818182	1.266828825	0.007052908	0.242381075	0.012653698	0.05103672	0.216	0.813	0.4355	0.4685	0.038461538	0.880797078	0.952574127	0.880797078	0.124641756	-0.333436515	N
0.828729282	1.745417935	0.013327509	0.241147477	0.056032116	0.10029103	0.419	0.814	0.66	0.643	0	0.731058579	0.880797078	0.880797078	0.212850003	-0.334438726	N
0.758139535	1.911364406	0.013327509	0.241147477	0.056032116	0.10029103	0.419	0.814	0.66	0.643	0	0.731058579	0.880797078	0.880797078	0.212850003	-0.334438726	N
0.719512195	3.062779238	0.010430529	0.020363965	0.015717421	0.01499104	0.347	0.491	0.4165	0.4189	0.049019608	0.880797078	0.952574127	0.880797078	0.109670819	-0.325110219	N
0.701421801	5.322245733	0.008926437	0.019090135	0.014828458	0.014552044	0.329	0.626	0.519	0.4825	0	0.880797078	0.952574127	0.880797078	0.121077247	-0.374535001	N
0.702341137	1.499485021	0.012965395	0.221875183	0.014095192	0.062461654	0.487	0.813	0.541	0.612333333	0	0.731058579	0.952574127	0.880797078	0.159834607	-0.361615881	N
0.89119171	4.458536598	0.009713227	0.023364143	0.015853379	0.01636325	0.172	0.643	0.5155	0.458416667	0.01010565	0.880797078	0.880797078	0.880797078	0.135335283	-0.346357612	N
0.784037559	4.53335835	0.005793204	0.025358574	0.014632279	0.015104084	0.276	0.62	0.4185	0.43325	0	0.880797078	0.952574127	0.92414182	0.092561176	-0.533242505	N
0.821138211	4.94125064	0.009713227	0.023364143	0.015853379	0.01636325	0.172	0.643	0.5155	0.458416667	0.01010565	0.880797078	0.880797078	0.880797078	0.135335283	-0.346357612	N
0.810638298	2.350983308	0.021374884	0.022069611	0.021722248	0.021722248	0.568	0.638	0.603	0.603	0.008888889	0.952574127	0.952574127	0.952574127	0.049787068	-0.792182792	N
0.817955112	3.08270146	0.008090455	0.017222106	0.014849206	0.013010271	0.121	0.456	0.2885	0.292	0	0.880797078	0.952574127	0.952574127	0.066896711	-0.401477191	N
0.867924528	3.046395679	0.009859406	0.015362646	0.012155456	0.012116617	0.457	0.573	0.514	0.5101875	0	0.880797078	0.952574127	0.880797078	0.103254703	-0.385858861	N
0.814285714	2.630929382	0.01720114	0.019503877	0.018352509	0.018352509	0.102	0.102	0.102	0.102	0	0.952574127	0.952574127	0.952574127	0.049787068	-0.792182792	N
0.841309824	2.865683818	0.012682886	0.018245836	0.01343482	0.014449591	0.151	0.425	0.318	0.303	0	0.880797078	0.952574127	0.92414182	0.092561176	-0.533242505	N
0.923684211	2.551903607	0.013296165	0.014961607	0.014104866	0.014116876	0.164	0.517	0.368	0.35425	0.004162331	0.880797078	0.952574127	0.92414182	0.092561176	-0.591378545	N
0.802597403	2.749915538	0.017512726	0.018415282	0.017964004	0.017964004	0.537	0.543	0.54	0.54	0	0.880797078	0.952574127	0.92414182	0.092561176	-0.749408684	N
0.871046229	5.134007001	0.013181532	0.014816793	0.013999163	0.013999163	0.541	0.548	0.5445	0.5445	0	0.952574127	0.952574127	0.952574127	0.049787068	-0.792182792	N
0.908860759	2.292434313	0.011037314	0.013012952	0.012025133	0.012025133	0.493	0.505	0.499	0.499	0	0.880797078	0.880797078	0.880797078	0.135335283	-0.706634577	N
0.86	2.818850843	0.013312985	0.014559063	0.013936024	0.013936024	0.128	0.129	0.1285	0.1285	0	0.880797078	0.952574127	0.92414182	0.092561176	-0.749408684	N
0.888888889	2.103356599	0.011037314	0.021965866	0.01469282	0.015597205	0.361	0.505	0.436	0.4345	0	0.880797078	0.880797078	0.880797078	0.135335283	-0.490468398	N
0.736725664	3.683118306	0.010180745	0.021429459	0.012387716	0.013734362	0.059	1	0.456	0.4173	0	0.880797078	0.952574127	0.952574127	0.05834189	-0.412489921	N
0.844559585	2.041987318	0.015130503	0.017986172	0.015945557	0.016251947	0.445	0.607	0.5065	0.51625	0.005943536	0.880797078	0.952574127	0.880797078	0.11394823	-0.511855452	N
0.846153846	2.92679862	0.011359607	0.023256658	0.014325695	0.016324531	0.344	0.526	0.3795	0.4196	0.009852217	0.880797078	0.952574127	0.880797078	0.126780462	-0.365901583	N
0.836021505	1.559337809	0.01082422	0.010937068	0.010880644	0.010880644	0.59	0.62	0.605	0.605	0	0.880797078	0.952574127	0.92414182	0.092561176	-0.749408684	N
0.877403846	3.529438207	0.011266935	0.020564889	0.01529592	0.015483922	0.182	0.689	0.443	0.4563	0.003120125	0.880797078	0.952574127	0.880797078	0.109670819	-0.369323512	N
0.747596154	3.267962828	0.017797084	0.020100539	0.018948811	0.018948811	0.202	0.207	0.2045	0.2045	0	0.880797078	0.880797078	0.880797078	0.135335283	-0.706634577	N
0.880886427	4.656923681	0.016372688	0.021965866	0.019169277	0.019169277	0.361	0.379	0.37	0.37	0	0.880797078	0.880797078	0.880797078	0.135335283	-0.706634577	N
0.875930521	3.568927074	0.016372688	0.021965866	0.019169277	0.019169277	0.361	0.379	0.37	0.37	0	0.880797078	0.880797078	0.880797078	0.135335283	-0.706634577	N
0.881481481	2.338422646	0.007799075	0.022069611	0.016911393	0.016451504	0.059	1	0.4035	0.383625	0.001107507	0.880797078	0.98201379	0.952574127	0.083557548	-0.325271763	N
0.875647668	2.288864008	0.007799075	0.009006153	0.008402614	0.008402614	0.069	0.071	0.07	0.07	0	0.880797078	0.952574127	0.92414182	0.092561176	-0.749408684	N
0.897097625	1.436645944	0.01082422	0.010937068	0.010880644	0.010880644	0.59	0.62	0.605	0.605	0	0.880797078	0.952574127	0.92414182	0.092561176	-0.749408684	N
0.46277666	2.201534492	0.011235323	0.015888278	0.013561801	0.013561801	0.362	0.376	0.369	0.369	0.020797227	0.880797078	0.880797078	0.880797078	0.135335283	-0.706634577	N
0.849411765	6.081895633	0.007921455	0.00800404	0.007962747	0.007962747	0.469	0.483	0.476	0.476	0.006506181	0.880797078	0.880797078	0.880797078	0.135335283	-0.706634577	N
0.76626506	2.015612023	0.010753232	0.012429036	0.011740327	0.01166573	0.316	0.424	0.365	0.3675	0	0.880797078	0.952574127	0.952574127	0.071174122	-0.533242505	N
0.860824742	2.47016707	0.013312985	0.02761075	0.01745669	0.01771159	0.128	0.531	0.415	0.400090909	0.001775253	0.880797078	0.952574127	0.952574127	0.088672621	-0.335250021	N
0.85	3.155534611	0.015552618	0.019125349	0.016673289	0.017041323	0.191	0.421	0.364	0.335625	0	0.880797078	0.98201379	0.952574127	0.07793372	-0.429093344	N
0.74120603	1.464696245	0.014138781	0.018565768	0.015937148	0.016118617	0.114	0.455	0.387	0.352642857	0.000332392	0.880797078	0.952574127	0.880797078	0.110892936	-0.401472642	N
0.783333333	4.343866144	0.009818113	0.013012952	0.011196918	0.011306225	0.493	0.584	0.543	0.54075	0	0.880797078	0.880797078	0.880797078	0.135335283	-0.548604437	N
0.875294118	2.613575586	0.014363654	0.021197606	0.016865434	0.017309078	0.122	0.527	0.454	0.411416667	0.000384578	0.880797078	0.952574127	0.952574127	0.069229844	-0.368308738	N
0.782022472	4.540559198	0.014461955	0.015207283	0.014834619	0.014834619	0.446	0.458	0.452	0.452	0	0.880797078	0.880797078	0.880797078	0.135335283	-0.706634577	N
0.728813559	2.232824848	0.017008461	0.021250794	0.018606768	0.018963199	0.38	0.443	0.408	0.406333333	0	0.880797078	0.952574127	0.880797078	0.121077247	-0.48434752	N
0.888311688	2.368639029	0.013296165	0.014961607	0.014104866	0.014116876	0.164	0.517	0.368	0.35425	0.004162331	0.880797078	0.952574127	0.92414182	0.092561176	-0.591378545	N
0.857843137	2.846224743	0.012945977	0.014009613	0.013477795	0.013477795	0.344	0.355	0.3495	0.3495	0	0.880797078	0.880797078	0.880797078	0.135335283	-0.706634577	N
0.77020202	2.489185044	0.013870531	0.018565768	0.01612855	0.015933962	0.081	0.4	0.096	0.1505	0	0.880797078	0.952574127	0.952574127	0.071174122	-0.533242505	N
0.779956427	2.282708007	0.017008461	0.021250794	0.018606768	0.018963199	0.38	0.443	0.408	0.406333333	0	0.880797078	0.952574127	0.880797078	0.121077247	-0.48434752	N
0.597381342	2.575123183	0.012147865	0.027173582	0.018822311	0.018540214	0.339	0.596	0.451	0.454708333	0.001001941	0.880797078	0.952574127	0.880797078	0.103254703	-0.32641101	N
0.914153132	3.328222848	0.01082422	0.020494954	0.01495917	0.015004283	0.422	0.879	0.6405	0.6644	0	0.880797078	0.952574127	0.880797078	0.101115997	-0.371034476	N
0.82464455	2.468074581	0.017008461	0.022235896	0.018606768	0.019140216	0.38	0.666	0.431	0.479833333	0.012461059	0.880797078	0.952574127	0.880797078	0.121077247	-0.45850928	N
0.850840336	2.621870213	0.00981652	0.035140275	0.016225305	0.018932503	0.164	0.594	0.4885	0.45985	0.002421894	0.731058579	0.952574127	0.880797078	0.108465794	-0.324384237	N
0.863013699	2.01518075	0.01187254	0.021250794	0.017779606	0.017720748	0.237	0.512	0.4195	0.411857143	0.001167883	0.880797078	0.98201379	0.880797078	0.108644977	-0.361770597	N
0.835051546	3.056437502	0.012945977	0.023256658	0.017873802	0.01798756	0.344	0.526	0.4235	0.42925	0	0.880797078	0.880797078	0.880797078	0.135335283	-0.490468398	N
0.742424242	2.452761086	0.008661251	0.024340907	0.010438886	0.013465292	0	0	0	0	0	0.880797078	0.952574127	0.952574127	0.07830314	-0.377877949	N
0.817307692	1.941251766	0.013183691	0.01533407	0.014143235	0.014201057	0.047	0.529	0.282	0.285	0.026666667	0.880797078	0.952574127	0.880797078	0.11394823	-0.511855452	N
0.795865633	3.272121369	0.01472307	0.026103497	0.017874233	0.018402906	0.402	0.628	0.527	0.5185	0	0.880797078	0.952574127	0.880797078	0.121077247	-0.413660326	N
0.81127451	3.394656379	0.013710846	0.029122774	0.017101764	0.018561159	0	0	0	0	0	0.880797078	0.952574127	0.92414182	0.092561176	-0.533242505	N
0.86746988	3.127860166	0.014751112	0.028633348	0.018831332	0.019536336	0.131	0.493	0.267	0.304666667	0	0.880797078	0.952574127	0.880797078	0.121077247	-0.432671041	N
0.768856448	5.044781301	0.010048972	0.016576843	0.014141844	0.01376106	0.081	0.448	0.0975	0.205833333	0	0.880797078	0.880797078	0.880797078	0.135335283	-0.706634577	N
0.848557692	1.632178717	0.009416716	0.018394877	0.010978775	0.012008433	0.088	0.4	0.297	0.2819375	0	0.731058579	0.952574127	0.880797078	0.112441949	-0.339298689	N
0.743276284	1.876456718	0.009150518	0.023748787	0.016151514	0.015857733	0.049	0.526	0.454	0.400928571	0	0.880797078	0.952574127	0.952574127	0.07830314	-0.404427178	N
0.792540793	1.623077719	0.012895086	0.025164622	0.017929167	0.018737859	0.064	0.462	0.1105	0.208166667	0	0.880797078	0.952574127	0.880797078	0.11394823	-0.490468398	N
0.674816626	1.445073007	0.00923144	0.010595339	0.00991339	0.00991339	0.524	0.526	0.525	0.525	0	0.880797078	0.880797078	0.880797078	0.135335283	-0.706634577	N
0.947368421	1.775671748	0.011266935	0.013963244	0.013229367	0.012922228	0.047	0.451	0.242	0.2455	0	0.880797078	0.952574127	0.92414182	0.092561176	-0.533242505	N
0.802222222	2.487766568	0.014363654	0.018030768	0.016151514	0.016109069	0.454	0.526	0.4885	0.485833333	0	0.952574127	0.952574127	0.952574127	0.049787068	-0.555637699	N
0.776470588	2.4142768	0.010048972	0.033975326	0.016131138	0.01777967	0.121	0.604	0.4015	0.380928571	0	0.880797078	0.98201379	0.952574127	0.081954671	-0.36691216	N
0.767676768	2.453221632	0.009976276	0.014678119	0.0124904	0.012424418	0.364	0.635	0.498	0.486	0	0.880797078	0.952574127	0.880797078	0.106819212	-0.414916179	N
0.779220779	2.632394546	0.013066093	0.028914199	0.016656204	0.018063008	0.331	0.673	0.4245	0.443583333	0.006506181	0.880797078	0.952574127	0.880797078	0.11822564	-0.380336242	N
0.795969773	4.984341075	0.010048972	0.022031457	0.016305829	0.016173022	0.296	0.448	0.379	0.3755	0	0.880797078	0.98201379	0.92414182	0.084693318	-0.519723309	N
0.890243902	2.363395639	0.014363654	0.02220792	0.017287963	0.017841429	0.411	0.596	0.4725	0.4851875	0.000946858	0.880797078	0.952574127	0.952574127	0.076520886	-0.386028451	N
0.916449086	2.249692024	0.008120786	0.034513845	0.013509154	0.015854246	0.059	0.631	0.374	0.358884615	0.000940992	0.880797078	0.98201379	0.952574127	0.07160884	-0.346224699	N
0.869017632	1.562528566	0.012790252	0.039437842	0.029738277	0.027354151	0.447	0.574	0.49	0.506	0	0.880797078	0.952574127	0.952574127	0.064045104	-0.470692469	N
0.861809045	3.062644718	0.014883908	0.015071317	0.014977612	0.014977612	0.187	0.19	0.1885	0.1885	0	0.952574127	0.952574127	0.952574127	0.049787068	-0.792182792	N
0.721649485	2.326940435	0.014540799	0.020499597	0.018948811	0.017991119	0.105	0.48	0.2045	0.267	0	0.880797078	0.880797078	0.880797078	0.135335283	-0.418413005	N
0.948320413	2.324304524	0.017008461	0.021250794	0.018606768	0.018963199	0.38	0.443	0.408	0.406333333	0	0.880797078	0.952574127	0.880797078	0.121077247	-0.48434752	N
0.851851852	10.69844001	0.014814505	0.019669929	0.015597038	0.016419628	0.129	0.3	0.2035	0.209	0	0.880797078	0.952574127	0.92414182	0.092561176	-0.749408684	N
0.832946636	4.349808368	0.017109982	0.027587399	0.02234869	0.02234869	0.323	0.336	0.3295	0.3295	0	0.880797078	0.880797078	0.880797078	0.135335283	-0.706634577	N
0.868486352	2.224567971	0.017008461	0.021250794	0.018606768	0.018963199	0.38	0.443	0.408	0.406333333	0	0.880797078	0.952574127	0.880797078	0.121077247	-0.48434752	N
0.850241546	2.386692153	0.014736749	0.018191237	0.016463993	0.016463993	0.245	0.271	0.258	0.258	0	0.952574127	0.952574127	0.952574127	0.049787068	-0.792182792	N
0.863309353	2.236456837	0.013146874	0.02408704	0.016529168	0.016979766	0.082	0.403	0.2295	0.235625	0	0.952574127	0.98201379	0.952574127	0.04454183	-0.473696735	N
0.774451098	2.103221709	0.011366253	0.021387937	0.014984931	0.015826092	0.534	0.582	0.5495	0.552	0	0.880797078	0.952574127	0.880797078	0.106819212	-0.498605556	N
0.878552972	1.159518294	0.01532278	0.020247897	0.018470211	0.018219406	0.392	0.472	0.442	0.439	0	0.880797078	0.952574127	0.952574127	0.07830314	-0.491778031	N
0.806896552	2.315782135	0.011452805	0.021250794	0.017357823	0.017115105	0.324	0.443	0.394	0.386625	0	0.880797078	0.952574127	0.880797078	0.124641756	-0.422146855	N
0.790754258	4.150038287	0.011452805	0.011688843	0.011570824	0.011570824	0.324	0.331	0.3275	0.3275	0	0.880797078	0.880797078	0.880797078	0.135335283	-0.706634577	N
0.581349206	2.807371747	0.012945977	0.014009613	0.013477795	0.013477795	0.344	0.355	0.3495	0.3495	0	0.880797078	0.880797078	0.880797078	0.135335283	-0.706634577	N
0.932330827	1.596469848	0.013183691	0.02312024	0.014794022	0.016472994	0.047	0.404	0.188	0.20675	0	0.880797078	0.952574127	0.880797078	0.11394823	-0.490468398	N
0.836027714	1.444848801	0.01082422	0.021010246	0.014980821	0.015449027	0.59	0.903	0.7315	0.739	0	0.880797078	0.952574127	0.952574127	0.071174122	-0.554629559	N
0.875949367	2.81398855	0.016265733	0.021051105	0.018658419	0.018658419	0.429	0.463	0.446	0.446	0	0.952574127	0.952574127	0.952574127	0.049787068	-0.792182792	N
0.840375587	2.995687789	0.014363654	0.020801004	0.016455696	0.016881076	0.115	0.504	0.3935	0.370083333	0.003072197	0.880797078	0.952574127	0.952574127	0.075451533	-0.408163778	N
0.834123223	2.208014432	0.013312985	0.02761075	0.017283707	0.0171862	0.128	0.531	0.3945	0.380131579	0.00050537	0.880797078	0.952574127	0.952574127	0.070048488	-0.335246161	N
0.895287958	4.786617419	0.013956928	0.025696596	0.015783028	0.017804895	0.374	0.449	0.422	0.41675	0	0.880797078	0.98201379	0.970687769	0.055438407	-0.541110363	N
0.763681592	2.81563551	0.016265733	0.023638164	0.019846706	0.019899327	0.421	0.463	0.431	0.4365	0	0.731058579	0.952574127	0.880797078	0.208833255	-0.416970426	N
0.84	2.482724861	0.009610682	0.015261089	0.011950624	0.012264284	0.412	0.626	0.5295	0.5332	0.000345289	0.880797078	0.952574127	0.880797078	0.096838587	-0.365333918	N
0.848699764	2.271574784	0.015347955	0.028760184	0.018622834	0.020269126	0.267	0.727	0.4955	0.477333333	0	0.880797078	0.952574127	0.880797078	0.106819212	-0.472767316	N
0.793269231	3.296964626	0.017928914	0.018852919	0.018390917	0.018390917	0.24	0.276	0.258	0.258	0	0.880797078	0.952574127	0.92414182	0.092561176	-0.749408684	N
0.791845494	1.695355307	0.012895086	0.026812298	0.01744788	0.018650786	0.064	0.488	0.264	0.27	0	0.880797078	0.952574127	0.952574127	0.071174122	-0.525374648	N
0.859813084	2.863576695	0.016089628	0.030555951	0.016652219	0.020696003	0.153	0.626	0.4045	0.386666667	0.003673095	0.880797078	0.952574127	0.880797078	0.11394823	-0.511855452	N
0.856481481	2.821478812	0.009754601	0.028914199	0.016834052	0.017276316	0.112	0.673	0.4245	0.409	0.005205622	0.880797078	0.952574127	0.880797078	0.12311411	-0.362030708	N
0.757575758	2.987168699	0.012945977	0.023256658	0.019372736	0.018626974	0	0	0	0	0	0.880797078	0.952574127	0.880797078	0.106819212	-0.437423719	N
0.795823666	2.802319756	0.014461955	0.015207283	0.014834619	0.014834619	0.446	0.458	0.452	0.452	0	0.880797078	0.880797078	0.880797078	0.135335283	-0.706634577	N
0.871465296	1.549223796	0.012895086	0.026812298	0.021187699	0.020303745	0.064	0.492	0.4625	0.368	0	0.880797078	0.952574127	0.952574127	0.081867649	-0.407152161	N
0.851485149	2.575987408	0.01532278	0.020247897	0.01840267	0.018094004	0.441	0.472	0.455	0.45575	0	0.880797078	0.952574127	0.92414182	0.092561176	-0.533242505	N
0.769620253	3.586596248	0.017109982	0.027587399	0.02234869	0.02234869	0.323	0.336	0.3295	0.3295	0	0.880797078	0.880797078	0.880797078	0.135335283	-0.706634577	N
0.902564103	3.641986377	0.014182814	0.021965866	0.015543269	0.016823515	0.128	0.46	0.37	0.313666667	0	0.880797078	0.952574127	0.880797078	0.11394823	-0.511855452	N
0.881188119	2.465922778	0.015755691	0.019914319	0.017985242	0.018088369	0.369	0.531	0.399	0.4252	0.00152381	0.880797078	0.952574127	0.92414182	0.092561176	-0.393277012	N
0.807792208	1.415046432	0.008120786	0.017613563	0.013302701	0.012732365	0.055	0.451	0.3955	0.3601	0.000951739	0.880797078	0.952574127	0.952574127	0.066896711	-0.360609325	N
0.761702128	1.78543902	0.01082422	0.019831344	0.013326611	0.014327196	0.422	0.62	0.533	0.527	0	0.880797078	0.952574127	0.952574127	0.071174122	-0.533242505	N
0.917098446	1.946275249	0.010970531	0.027587399	0.017203678	0.018098398	0.142	0.455	0.3295	0.3086	0.002014099	0.880797078	0.952574127	0.880797078	0.126780462	-0.378625278	N
0.773033708	2.153276097	0.00992359	0.016578012	0.012820673	0.013035737	0.405	1	0.709	0.70575	0.006688963	0.880797078	0.952574127	0.92414182	0.092561176	-0.533242505	N
0.861413043	4.216567209	0.012290097	0.02468159	0.018602475	0.018258492	0.108	1	0.346	0.4065	0.008056395	0.880797078	0.952574127	0.880797078	0.103254703	-0.398425599	N
0.797297297	3.469381114	0.013063808	0.01450025	0.013782029	0.013782029	0.278	0.281	0.2795	0.2795	0	0.880797078	0.880797078	0.880797078	0.135335283	-0.706634577	N
0.908188586	2.665280289	0.019613855	0.021197606	0.02040573	0.02040573	0.497	0.52	0.5085	0.5085	0	0.880797078	0.880797078	0.880797078	0.135335283	-0.706634577	N
0.867298578	2.375762433	0.008090455	0.021429459	0.017357823	0.01686005	0.33	1	0.407	0.445571429	0.002647954	0.880797078	0.952574127	0.952574127	0.083395296	-0.336182113	N
0.891891892	2.156895221	0.011266935	0.019919099	0.015861078	0.015727047	0.435	0.61	0.5255	0.524	0.015584416	0.880797078	0.952574127	0.880797078	0.11394823	-0.511855452	N
0.756218905	2.18387316	0.017797084	0.020100539	0.018948811	0.018948811	0.202	0.207	0.2045	0.2045	0	0.880797078	0.880797078	0.880797078	0.135335283	-0.706634577	N
0.912820513	3.690795747	0.013540794	0.015541379	0.014249841	0.014395464	0.562	0.593	0.5725	0.575	0	0.731058579	0.880797078	0.817574476	0.251607362	-0.432332358	N
0.891826923	1.657370654	0.012682886	0.018245836	0.01343482	0.014449591	0.151	0.425	0.318	0.303	0	0.880797078	0.952574127	0.92414182	0.092561176	-0.533242505	N
0.777777778	2.285458788	0.007799075	0.027842436	0.01724542	0.01702127	0.069	0.531	0.348	0.306192308	0.001657688	0.880797078	0.98201379	0.952574127	0.073688717	-0.340347943	N
0.861244019	3.345387704	0.016107222	0.022062106	0.018441192	0.018563558	0.102	0.555	0.102	0.20525	0	0.880797078	0.952574127	0.952574127	0.060480595	-0.450386952	N
0.832884097	1.945553936	0.017354682	0.027842436	0.018955371	0.020890962	0.369	0.531	0.4785	0.458166667	0.003288392	0.880797078	0.952574127	0.880797078	0.106819212	-0.472767316	N
0.729792148	2.193834653	0.013246687	0.014697025	0.013971856	0.013971856	0.454	0.458	0.456	0.456	0	0.880797078	0.880797078	0.880797078	0.135335283	-0.706634577	N
0.8	2.584670076	0.010305573	0.022069611	0.015543089	0.01536937	0.253	1	0.562	0.605714286	0.001007811	0.880797078	0.952574127	0.880797078	0.095616469	-0.328024879	N
0.851941748	2.871675324	0.01082422	0.021639447	0.013887162	0.015059498	0.59	0.727	0.616	0.63725	0	0.880797078	0.952574127	0.952574127	0.071174122	-0.533242505	N
0.755395683	1.812642933	0.01496096	0.02408704	0.017924896	0.01843221	0.082	0.562	0.403	0.3616	0	0.880797078	0.952574127	0.952574127	0.07830314	-0.446929076	N
0.875989446	1.307497772	0.012254367	0.025358574	0.018202366	0.018343894	0.147	0.421	0.2415	0.26625	0	0.880797078	0.952574127	0.880797078	0.124641756	-0.407612845	N
0.759894459	2.217477563	0.017008461	0.026873749	0.020099217	0.020139521	0.38	0.489	0.4135	0.42	0	0.880797078	0.952574127	0.880797078	0.103254703	-0.432840382	N
0.729064039	3.16628068	0.013878305	0.018573613	0.016225959	0.016225959	0.683	0.689	0.686	0.686	0	0.952574127	0.952574127	0.952574127	0.049787068	-0.792182792	N
0.905370844	1.321726929	0.008120786	0.014623045	0.010249148	0.010670648	0.059	0.451	0.36	0.290285714	0.001122684	0.880797078	0.952574127	0.952574127	0.062008242	-0.379530092	N
0.808564232	4.524998641	0.015534813	0.021051105	0.016311017	0.017301988	0.429	0.463	0.45	0.448	0.002836879	0.880797078	0.952574127	0.92414182	0.092561176	-0.533242505	N
0.904509284	3.399766439	0.020667094	0.025943508	0.023305301	0.023305301	0.484	0.567	0.5255	0.5255	0	0.952574127	0.952574127	0.952574127	0.049787068	-0.792182792	N
0.807424594	2.378624967	0.013312985	0.020564889	0.017357154	0.016961277	0.122	0.185	0.1285	0.144666667	0	0.880797078	0.952574127	0.92414182	0.092561176	-0.442176398	N
0.886138614	1.822217985	0.023254442	0.025358574	0.024306508	0.024306508	0.276	0.276	0.276	0.276	0	0.880797078	0.952574127	0.92414182	0.092561176	-0.749408684	N
0.759124088	3.299546308	0.017008461	0.019735205	0.017357823	0.017864828	0.38	0.443	0.4135	0.4125	0	0.880797078	0.952574127	0.880797078	0.11394823	-0.569991491	N
0.789010989	3.061573013	0.014335342	0.017863602	0.015531826	0.015815649	0.496	0.608	0.5685	0.56025	0	0.880797078	0.98201379	0.92414182	0.084693318	-0.541110363	N
0.78271028	1.413350662	0.011412531	0.014909961	0.012715711	0.012938479	0.422	0.611	0.485	0.50075	0	0.880797078	0.880797078	0.880797078	0.135335283	-0.490468398	N
0.834158416	3.612347627	0.010319011	0.018356901	0.011974021	0.012366053	0.5	0.578	0.5345	0.540833333	0.000360198	0.880797078	0.952574127	0.880797078	0.099690194	-0.401381381	N
0.84962406	2.763576446	0.01407962	0.017693347	0.015886484	0.015886484	0.376	0.408	0.392	0.392	0	0.952574127	0.952574127	0.952574127	0.049787068	-0.792182792	N
0.891826923	3.698323586	0.007799075	0.026812298	0.015872383	0.016242232	0.059	0.582	0.4045	0.312944444	0.002154399	0.880797078	0.952574127	0.952574127	0.087808497	-0.337683416	N
0.846938776	3.15961454	0.013481187	0.033016326	0.017166438	0.01866754	0.176	0.576	0.385	0.381027778	0	0.731058579	0.952574127	0.92414182	0.100312648	-0.331092918	N
0.742424242	1.274212957	0.014363654	0.018030768	0.016151514	0.016109069	0.454	0.526	0.4885	0.485833333	0	0.952574127	0.952574127	0.952574127	0.049787068	-0.555637699	N
0.908415842	2.334263836	0.016265733	0.021051105	0.018658419	0.018658419	0.429	0.463	0.446	0.446	0	0.952574127	0.952574127	0.952574127	0.049787068	-0.792182792	N
0.85046729	1.86302666	0.01532278	0.020247897	0.01840267	0.018094004	0.441	0.472	0.455	0.45575	0	0.880797078	0.952574127	0.92414182	0.092561176	-0.533242505	N
0.62826087	5.267446652	0.029670649	0.031602427	0.030636538	0.030636538	0.578	0.58	0.579	0.579	0	0.880797078	0.880797078	0.880797078	0.135335283	-0.706634577	N
0.811926606	3.557000724	0.014461955	0.017599107	0.015931394	0.015980962	0.446	0.584	0.4855	0.50025	0	0.880797078	0.952574127	0.92414182	0.092561176	-0.533242505	N
0.865248227	2.266149077	0.016382792	0.021197606	0.020014416	0.019402307	0.475	0.52	0.4885	0.493	0	0.880797078	0.952574127	0.92414182	0.092561176	-0.503987594	N
0.883495146	2.102004355	0.01532278	0.020247897	0.01840267	0.018094004	0.441	0.472	0.455	0.45575	0	0.880797078	0.952574127	0.92414182	0.092561176	-0.533242505	N
0.84295612	2.015300429	0.016265733	0.021051105	0.018658419	0.018658419	0.429	0.463	0.446	0.446	0	0.952574127	0.952574127	0.952574127	0.049787068	-0.792182792	N
0.815461347	1.943154456	0.01532278	0.02761075	0.018470211	0.01974202	0.367	0.472	0.4245	0.4228	0	0.880797078	0.952574127	0.952574127	0.075451533	-0.417465545	N
0.9	1.534690248	0.01082422	0.010937068	0.010880644	0.010880644	0.59	0.62	0.605	0.605	0	0.880797078	0.952574127	0.92414182	0.092561176	-0.749408684	N
0.872901679	1.85355019	0.017008461	0.021250794	0.018606768	0.018963199	0.38	0.443	0.408	0.406333333	0	0.880797078	0.952574127	0.880797078	0.121077247	-0.48434752	N
0.791469194	2.342584591	0.010048972	0.021965866	0.015951061	0.015818327	0.182	0.502	0.309	0.32775	0	0.880797078	0.952574127	0.880797078	0.126780462	-0.365901583	N
0.805555556	1.803795567	0.01604415	0.019707999	0.017876075	0.017876075	0.115	0.119	0.117	0.117	0	1	0				N
0.846522782	3.292733732	0.013878305	0.018573613	0.016225959	0.016225959	0.683	0.689	0.686	0.686	0	0.952574127	0.952574127	0.952574127	0.049787068	-0.792182792	N
0.854054054	8.565448407	0.013146979	0.021121144	0.017418855	0.01738114	0.275	0.475	0.429	0.396166667	0	0.880797078	0.952574127	0.952574127	0.064045104	-0.489703184	N
0.598014888	4.717719022	0.019531201	0.022298166	0.020914684	0.020914684	0.467	0.499	0.483	0.483	0.037383178	0.880797078	0.880797078	0.880797078	0.135335283	-0.706634577	N
0.908415842	3.361228367	0.012299337	0.016055019	0.014177178	0.014177178	0.572	0.619	0.5955	0.5955	0.041237113	0.880797078	0.880797078	0.880797078	0.135335283	-0.706634577	N
0.856164384	3.923841184	0.016360578	0.020559744	0.018460161	0.018460161	0.546	0.559	0.5525	0.5525	0	0.880797078	0.952574127	0.92414182	0.092561176	-0.749408684	N
0.796573876	3.634227838	0.011176627	0.011691731	0.011434179	0.011434179	0.059	0.062	0.0605	0.0605	0	0.952574127	0.952574127	0.952574127	0.049787068	-0.792182792	N
0.792656587	2.147449453	0.010319011	0.01305382	0.011716947	0.011589757	0.412	0.578	0.525	0.524125	0	0.880797078	0.952574127	0.92414182	0.092561176	-0.385651881	N
0.931937173	2.357900224	0.009610682	0.021410029	0.012833926	0.014630684	0.454	0.609	0.5115	0.525	0	0.880797078	0.952574127	0.880797078	0.101115997	-0.413591509	N
0.740932642	1.446845751	0.00923144	0.010595339	0.00991339	0.00991339	0.524	0.526	0.525	0.525	0	0.880797078	0.880797078	0.880797078	0.135335283	-0.706634577	N
0.847058824	2.014240956	0.014223523	0.020801022	0.017500926	0.017280694	0.285	0.373	0.348	0.3382	0.003072983	0.952574127	0.98201379	0.952574127	0.046639925	-0.449464048	N
0.895261845	2.041357271	0.013181532	0.034783011	0.022212178	0.022874993	0.466	0.548	0.5135	0.51025	0.031007752	0.880797078	0.952574127	0.92414182	0.092561176	-0.533242505	N
0.92746114	3.214602354	0.011412531	0.016867847	0.01406371	0.014208393	0.422	0.611	0.53	0.514	0.001892148	0.880797078	0.880797078	0.880797078	0.135335283	-0.418413005	N
0.739130435	1.755069937	0.013183691	0.013275044	0.013229367	0.013229367	0.047	0.049	0.048	0.048	0	0.880797078	0.952574127	0.92414182	0.092561176	-0.749408684	N
0.902255639	2.379117447	0.017928914	0.018852919	0.018390917	0.018390917	0.24	0.276	0.258	0.258	0	0.880797078	0.952574127	0.92414182	0.092561176	-0.749408684	N
0.726392252	2.575332991	0.013312985	0.014559063	0.013936024	0.013936024	0.128	0.129	0.1285	0.1285	0	0.880797078	0.952574127	0.92414182	0.092561176	-0.749408684	N
0.813131313	1.48756234	0.016936342	0.02761075	0.01818176	0.019874053	0.16	0.43	0.267	0.281	0	0.880797078	0.98201379	0.952574127	0.056546667	-0.4867687	N
0.792079208	3.587839914	0.012671769	0.025943508	0.015520087	0.016479261	0.198	0.584	0.3615	0.38305	0	0.880797078	0.98201379	0.92414182	0.08906435	-0.354014196	N
0.686915888	2.191079907	0.011923006	0.018338879	0.014156238	0.014155178	0.396	0.568	0.499	0.496625	0	0.880797078	0.952574127	0.880797078	0.103254703	-0.501669948	N
0.826484018	2.871565374	0.007891553	0.018394877	0.012372334	0.012530514	0.24	0.526	0.436	0.4245	0.001298099	0.880797078	0.952574127	0.952574127	0.088672621	-0.337878883	N
0.862470862	1.618934771	0.00923144	0.010595339	0.00991339	0.00991339	0.524	0.526	0.525	0.525	0	0.880797078	0.880797078	0.880797078	0.135335283	-0.706634577	N
0.870558376	2.320572494	0.014363654	0.02761075	0.017655197	0.018172068	0.16	0.531	0.4265	0.409678571	0.00027653	0.880797078	0.98201379	0.952574127	0.063939556	-0.35001095	N
0.748704663	2.322252892	0.013296165	0.0192855	0.014594964	0.01578762	0.164	0.517	0.4155	0.374666667	0.003469211	0.880797078	0.952574127	0.880797078	0.106819212	-0.453756602	N
0.914004914	2.221523141	0.014883908	0.015071317	0.014977612	0.014977612	0.187	0.19	0.1885	0.1885	0	0.952574127	0.952574127	0.952574127	0.049787068	-0.792182792	N
0.889705882	2.022904644	0.01532278	0.020247897	0.018470211	0.018219406	0.392	0.472	0.442	0.439	0	0.880797078	0.952574127	0.952574127	0.07830314	-0.491778031	N
0.919060052	2.6005585	0.017008461	0.022235896	0.021107586	0.020407588	0.38	0.666	0.431	0.479833333	0.015564202	0.880797078	0.952574127	0.880797078	0.121077247	-0.432671041	N
0.931203931	1.840195153	0.014223523	0.020801022	0.018043205	0.017289512	0.285	0.373	0.34	0.334875	0.003203845	0.952574127	0.952574127	0.952574127	0.049787068	-0.467933523	N
0.72979798	2.293247141	0.013312985	0.021197606	0.017692725	0.017085213	0.128	0.531	0.4905	0.405875	0.001734605	0.880797078	0.952574127	0.880797078	0.103254703	-0.403772362	N
0.822815534	6.336165248	0.013181532	0.014816793	0.013999163	0.013999163	0.541	0.548	0.5445	0.5445	0	0.952574127	0.952574127	0.952574127	0.049787068	-0.792182792	N
0.847775176	3.450987089	0.017802865	0.01815309	0.017977977	0.017977977	0.29	0.307	0.2985	0.2985	0	0.952574127	0.952574127	0.952574127	0.049787068	-0.792182792	N
0.835616438	2.191351537	0.006149301	0.009006153	0.007028905	0.007256622	0.069	0.483	0.3325	0.291833333	0.008920607	0.880797078	0.952574127	0.880797078	0.106819212	-0.463261959	N
0.703791469	2.248703505	0.009150518	0.009756832	0.009453675	0.009453675	0.471	0.487	0.479	0.479	0	0.880797078	0.952574127	0.92414182	0.092561176	-0.749408684	N
0.797619048	2.714592407	0.01218172	0.017671604	0.015881615	0.015519691	0.111	0.364	0.175	0.213	0.001032969	0.880797078	0.952574127	0.952574127	0.062619301	-0.361287486	N
0.892950392	2.418975553	0.008718054	0.009895436	0.009306745	0.009306745	0.324	0.365	0.3445	0.3445	0	0.952574127	0.952574127	0.952574127	0.049787068	-0.792182792	N
0.796766744	2.357247766	0.010752427	0.0163563	0.013331247	0.013442805	0.283	0.455	0.3715	0.37025	0.005665722	0.880797078	0.952574127	0.92414182	0.092561176	-0.511855452	N
0.528	2.654784181	0.016779374	0.022761385	0.019287728	0.01940832	0.456	0.567	0.513	0.5187	0.001249219	0.880797078	0.952574127	0.952574127	0.084006354	-0.401831833	N
0.777511962	4.477863931	0.013876241	0.022107534	0.018541292	0.018101045	0.489	0.53	0.5025	0.508	0.000736493	0.880797078	0.880797078	0.880797078	0.135335283	-0.470089484	N
0.86746988	5.360540207	0.012848008	0.01483377	0.013784753	0.013812821	0.538	0.586	0.5655	0.56375	0	0.731058579	0.880797078	0.880797078	0.193471323	-0.432332358	N
0.880382775	1.785916057	0.013878305	0.018573613	0.016225959	0.016225959	0.683	0.689	0.686	0.686	0	0.952574127	0.952574127	0.952574127	0.049787068	-0.792182792	N
0.869565217	2.402282036	0.016372688	0.025855972	0.022149645	0.021631987	0.361	0.566	0.443	0.45325	0	0.880797078	0.880797078	0.880797078	0.135335283	-0.469081344	N
0.754854369	2.212540978	0.009150518	0.012245267	0.010542923	0.010649743	0.427	0.487	0.454	0.456333333	0	0.880797078	0.952574127	0.880797078	0.121077247	-0.432671041	N
0.938666667	2.854350026	0.012945977	0.014009613	0.013477795	0.013477795	0.344	0.355	0.3495	0.3495	0	0.880797078	0.880797078	0.880797078	0.135335283	-0.706634577	N
0.864168618	1.579549335	0.014335342	0.021790895	0.017409349	0.017736234	0.132	0.557	0.3155	0.33	0	0.880797078	0.98201379	0.92414182	0.084693318	-0.511855452	N
0.892030848	3.340463936	0.012992527	0.015207283	0.014308318	0.014187575	0.446	0.502	0.469	0.471	0	0.880797078	0.952574127	0.880797078	0.121077247	-0.48434752	N
0.858823529	3.45680768	0.012945977	0.018941383	0.014396129	0.015334216	0.229	0.584	0.4565	0.428333333	0	0.880797078	0.952574127	0.880797078	0.109670819	-0.410916525	N
0.9453125	1.80057643	0.013312985	0.02761075	0.017725185	0.017806601	0.128	0.531	0.3945	0.384645833	0.000474369	0.880797078	0.98201379	0.952574127	0.075209576	-0.319755446	N
0.882063882	1.808778794	0.011653944	0.013888496	0.013329986	0.013050603	0.182	0.461	0.3515	0.3365	0	0.880797078	0.952574127	0.952574127	0.071174122	-0.554629559	N
0.796437659	3.53655565	0.016265733	0.021051105	0.018658419	0.018658419	0.429	0.463	0.446	0.446	0	0.952574127	0.952574127	0.952574127	0.049787068	-0.792182792	N
0.758782201	3.240760964	0.019419676	0.022170841	0.020795259	0.020795259	0.471	0.524	0.4975	0.4975	0.037383178	0.880797078	0.880797078	0.880797078	0.135335283	-0.706634577	N
0.882352941	2.134462393	0.017008461	0.019735205	0.017357823	0.017864828	0.38	0.443	0.4135	0.4125	0	0.880797078	0.952574127	0.880797078	0.11394823	-0.569991491	N
0.819413093	1.979434488	0.013296165	0.02220792	0.015356455	0.016886315	0.5	1	0.5715	0.693333333	0.003639672	0.880797078	0.952574127	0.880797078	0.121077247	-0.432671041	N
0.841708543	2.11622708	0.015677111	0.022274422	0.019694372	0.019335069	0.477	0.519	0.4985	0.49825	0.017843866	0.880797078	0.880797078	0.880797078	0.135335283	-0.548604437	N
0.843091335	4.734437738	0.013063808	0.01450025	0.013782029	0.013782029	0.278	0.281	0.2795	0.2795	0	0.880797078	0.880797078	0.880797078	0.135335283	-0.706634577	N
0.865979381	2.865795068	0.014696779	0.024858356	0.016635206	0.017737416	0.149	0.562	0.3885	0.3724	0.007797271	0.880797078	0.952574127	0.880797078	0.11394823	-0.398425599	N
0.753593429	6.481236843	0.007921455	0.00800404	0.007962747	0.007962747	0.469	0.483	0.476	0.476	0.006506181	0.880797078	0.880797078	0.880797078	0.135335283	-0.706634577	N
0.844387755	2.390104881	0.014736749	0.018191237	0.016463993	0.016463993	0.245	0.271	0.258	0.258	0	0.952574127	0.952574127	0.952574127	0.049787068	-0.792182792	N
0.768321513	3.393778391	0.024389911	0.025646898	0.025018404	0.025018404	0.657	0.657	0.657	0.657	0	0.952574127	0.952574127	0.952574127	0.049787068	-0.792182792	N
0.904255319	1.975623128	0.012213964	0.016867847	0.014923027	0.014731966	0.422	0.556	0.48	0.4845	0.003669725	0.880797078	0.880797078	0.880797078	0.135335283	-0.490468398	N
0.8	2.541827615	0.01532278	0.020247897	0.018470211	0.018219406	0.392	0.472	0.442	0.439	0	0.880797078	0.952574127	0.952574127	0.07830314	-0.491778031	N
0.898701299	2.149341772	0.012480119	0.024340907	0.015911579	0.017175909	0.413	1	0.5325	0.669	0.001649995	0.880797078	0.952574127	0.880797078	0.121077247	-0.35111029	N
0.752525253	2.089124857	0.01532278	0.020247897	0.018470211	0.018219406	0.392	0.472	0.442	0.439	0	0.880797078	0.952574127	0.952574127	0.07830314	-0.491778031	N
0.803738318	2.088930791	0.015966933	0.029545931	0.028030895	0.024541458	0.336	0.696	0.578	0.529333333	0	0.952574127	0.98201379	0.952574127	0.041919211	-0.64202051	N
0.87244898	1.381107657	0.008120786	0.027842436	0.012343724	0.013924252	0.24	0.493	0.375	0.3750625	0.001638002	0.880797078	0.952574127	0.952574127	0.087214412	-0.35639091	N
0.873762376	1.122299985	0.013146874	0.014763188	0.013948637	0.013951834	0.089	0.461	0.251	0.263	0	0.952574127	0.98201379	0.970687769	0.034051354	-0.591752327	N
0.845758355	3.491199302	0.016372688	0.023506628	0.018914534	0.019504042	0.136	0.379	0.2885	0.266375	0	0.880797078	0.98201379	0.952574127	0.073057902	-0.461679672	N
0.879518072	2.189674725	0.014335342	0.017863602	0.015531826	0.015815649	0.496	0.608	0.5685	0.56025	0	0.880797078	0.98201379	0.92414182	0.084693318	-0.541110363	N
0.839328537	2.270910645	0.010299083	0.010829868	0.010564475	0.010564475	0.239	0.253	0.246	0.246	0	0.952574127	0.952574127	0.952574127	0.049787068	-0.792182792	N
0.744245524	3.06519607	0.01218172	0.018965114	0.015653261	0.015570808	0.111	0.507	0.232	0.24525	0.001154651	0.880797078	0.952574127	0.952574127	0.060480595	-0.351877742	N
0.798053528	4.268036853	0.009439502	0.009925987	0.009682744	0.009682744	0.69	0.711	0.7005	0.7005	0	0.880797078	0.952574127	0.92414182	0.092561176	-0.749408684	N
0.846522782	2.274615154	0.014790875	0.017986172	0.016146303	0.016267413	0.558	1	0.8035	0.79125	0.002402402	0.880797078	0.952574127	0.92414182	0.092561176	-0.533242505	N
0.89382716	2.271349043	0.015379964	0.02761075	0.017167671	0.018949476	0.339	0.43	0.387	0.385166667	0.008908686	0.880797078	0.952574127	0.92414182	0.092561176	-0.451681755	N
0.840686275	3.294067003	0.014349487	0.020747401	0.017129056	0.01742258	0.475	0.576	0.5235	0.5259375	0.000710191	0.731058579	0.952574127	0.880797078	0.14452253	-0.33828415	N
0.905759162	2.613071974	0.014223523	0.020801022	0.017500926	0.017280694	0.285	0.373	0.348	0.3382	0.003072983	0.952574127	0.98201379	0.952574127	0.046639925	-0.449464048	N
0.778538813	2.1236441	0.00923144	0.010595339	0.010376472	0.010144931	0.524	0.563	0.5335	0.5385	0	0.880797078	0.880797078	0.880797078	0.135335283	-0.548604437	N
0.826086957	7.83234126	0.012682886	0.012891976	0.012787431	0.012787431	0.418	0.425	0.4215	0.4215	0	0.880797078	0.880797078	0.880797078	0.135335283	-0.706634577	N
0.893150685	3.711119617	0.017109982	0.027587399	0.02234869	0.02234869	0.323	0.336	0.3295	0.3295	0	0.880797078	0.880797078	0.880797078	0.135335283	-0.706634577	N
0.880668258	2.900471586	0.014736749	0.018191237	0.016463993	0.016463993	0.245	0.271	0.258	0.258	0	0.952574127	0.952574127	0.952574127	0.049787068	-0.792182792	N
0.763636364	2.464839923	0.009150518	0.015509485	0.011908071	0.012119037	0.403	0.487	0.462	0.4535	0	0.880797078	0.952574127	0.92414182	0.092561176	-0.533242505	N
0.880952381	2.452263799	0.011960751	0.024874339	0.020416081	0.019351452	0.322	0.731	0.489	0.5115	0.001851423	0.880797078	0.952574127	0.92414182	0.092561176	-0.368372592	N
0.588357588	2.475406769	0.017797084	0.020100539	0.018948811	0.018948811	0.202	0.207	0.2045	0.2045	0	0.880797078	0.880797078	0.880797078	0.135335283	-0.706634577	N
0.87403599	1.852333579	0.01532278	0.020247897	0.018470211	0.018219406	0.392	0.472	0.442	0.439	0	0.880797078	0.952574127	0.952574127	0.07830314	-0.491778031	N
0.7617866	3.343353368	0.010048972	0.021965866	0.016642127	0.01658243	0.361	0.584	0.447	0.4568	0.00231448	0.880797078	0.952574127	0.880797078	0.122503051	-0.343223849	N
0.860189573	2.05628003	0.013312985	0.02761075	0.017145512	0.017513494	0.128	0.531	0.423	0.408291667	0.000908988	0.880797078	0.952574127	0.952574127	0.07830314	-0.340180755	N
0.761670762	2.305798951	0.00923144	0.010595339	0.00991339	0.00991339	0.524	0.526	0.525	0.525	0	0.880797078	0.880797078	0.880797078	0.135335283	-0.706634577	N
0.840848806	1.489045151	0.011819873	0.026812298	0.018856375	0.018574851	0.316	0.492	0.4625	0.4382	0	0.880797078	0.952574127	0.92414182	0.092561176	-0.386433155	N
0.867924528	3.442844818	0.011452805	0.015207283	0.014396129	0.013867933	0.187	0.48	0.3885	0.358875	0	0.880797078	0.952574127	0.880797078	0.103254703	-0.412959608	N
0.916442049	3.886982149	0.012671769	0.015207283	0.014109982	0.013925583	0.341	0.502	0.452	0.432333333	0	0.880797078	0.952574127	0.880797078	0.121077247	-0.48434752	N
0.834183673	3.926952535	0.012671769	0.015207283	0.014109982	0.013925583	0.341	0.502	0.452	0.432333333	0	0.880797078	0.952574127	0.880797078	0.121077247	-0.48434752	N
0.75308642	1.809172122	0.01532278	0.02761075	0.018470211	0.01974202	0.367	0.472	0.4245	0.4228	0	0.880797078	0.952574127	0.952574127	0.075451533	-0.417465545	N
0.84	4.282753292	0.012363484	0.025164622	0.019932421	0.019672142	0.437	0.642	0.5485	0.542833333	0.003202562	0.880797078	0.880797078	0.880797078	0.135335283	-0.418413005	N
0.772823779	3.482161085	0.012992527	0.017599107	0.014834619	0.015200451	0.446	0.584	0.4935	0.498	0	0.880797078	0.952574127	0.880797078	0.106819212	-0.472767316	N
0.643835616	5.648245938	0.003219392	0.024393252	0.008375403	0.010917998	0.061	0.614	0.396	0.404086957	0	0.731058579	0.952574127	0.880797078	0.123652897	-0.266780262	N
0.777142857	3.992308135	0.005597438	0.082478167	0.010685465	0.011920491	0.051	0.85	0.5145	0.443253623	0.001806386	0.731058579	0.952574127	0.880797078	0.148912095	-0.097410278	N
0.760233918	4.081174799	0.005213255	0.031640561	0.01207437	0.013814188	0.06	0.662	0.5085	0.48498913	0	0.880797078	0.952574127	0.880797078	0.118597589	-0.153058954	N
0.729323308	1.940221872	0.009059864	0.017756411	0.011657535	0.012081861	0.128	0.662	0.583	0.546086957	0.00148258	0.880797078	0.952574127	0.952574127	0.060945531	-0.545653807	N
0.625	3.547760117	0.004595362	0.017356358	0.0094055	0.009677873	0.068	0.557	0.315	0.31406087	0.000195854	0.880797078	0.98201379	0.952574127	0.08670828	-0.1462951	N
0.760416667	1.757300986	0.008534235	0.019110789	0.013381992	0.012907119	0.169	0.63	0.5285	0.499521739	0	0.880797078	0.952574127	0.880797078	0.12417682	-0.324392378	N
0.752747253	2.556386473	0.00543961	0.014884485	0.009052314	0.009377353	0.063	0.705	0.544	0.516195652	0	0.880797078	0.952574127	0.880797078	0.129756052	-0.260677107	N
0.766666667	1.57765297	0.005789975	1	0.066721605	0.089536182	0.152	1	0.6815	0.651788043	0.001594553	0.5	0.952574127	0.880797078	0.201633843	-0.052109199	N
0.177631579	2.443880157	0.00976524	0.018246236	0.012024971	0.012263372	0.037	0.425	0.102	0.139086957	0.002305476	0.952574127	0.98201379	0.952574127	0.048418745	-0.558180593	N
0.774358974	1.616153986	0.007754811	0.015261095	0.010670844	0.010663417	0.109	0.746	0.198	0.347043478	0	0.731058579	0.952574127	0.880797078	0.108774946	-0.281658213	N
0.738255034	2.435988121	0.006700379	0.016900335	0.010257007	0.010351044	0.106	0.657	0.21	0.32723913	0.001499337	0.731058579	0.952574127	0.880797078	0.119409486	-0.329159713	N
0.762886598	4.226178642	0.010325645	0.018704092	0.014225073	0.013952451	0.157	0.635	0.545	0.511608696	0.002881844	0.880797078	0.952574127	0.880797078	0.12417682	-0.482422518	N
0.802955665	5.455639178	0.007872947	0.017059084	0.009902138	0.010222817	0.074	0.598	0.499	0.474304348	0.003454231	0.880797078	0.952574127	0.880797078	0.101859895	-0.504739444	N
0.986394558	2.804226236	0.00543961	0.011258668	0.007097312	0.007398645	0.063	0.705	0.531	0.501586957	0	0.880797078	0.952574127	0.880797078	0.127896308	-0.320672891	N
0.75739645	1.047178166	0.005945657	0.095892958	0.080773725	0.061354283	0.216	0.759	0.674	0.63426087	0.002998731	0.731058579	0.880797078	0.731058579	0.276883901	-0.329715437	N
0.763157895	1.222773705	0.00826531	0.018471091	0.011510757	0.011957353	0.093	0.302	0.121	0.153347826	0.001729107	0.880797078	0.952574127	0.880797078	0.120457333	-0.486142005	N
0.755681818	1.109741543	0.005945657	0.095892958	0.014480883	0.038368099	0.059	0.85	0.523	0.534717391	0.002998731	0.731058579	0.952574127	0.880797078	0.21250072	-0.177932439	N
0.713235294	4.623947739	0.005731079	0.017382879	0.008913661	0.009583257	0.02	1	0.397	0.385304348	0.000887193	0.731058579	0.952574127	0.952574127	0.077101707	-0.158359582	N
0.691860465	1.398676547	0.007964077	0.076065561	0.0119403	0.013169833	0.07	0.739	0.4955	0.486543478	0.000576654	0.731058579	0.952574127	0.880797078	0.131091872	-0.259341287	N
0.711442786	3.487233931	0.005705437	0.082478167	0.011054797	0.012383387	0.056	0.85	0.452	0.451565217	0.001092598	0.731058579	0.952574127	0.880797078	0.155137375	-0.102174148	N
0.76744186	2.293898063	0.005741653	0.010975318	0.00744859	0.007814492	0.109	0.442	0.368	0.346	0.000691802	0.880797078	0.952574127	0.880797078	0.120457333	-0.486142005	N
0.77	1.927960204	0.006709287	0.081249049	0.010212581	0.011164701	0.054	0.782	0.473	0.424869565	0.001816452	0.731058579	0.952574127	0.880797078	0.125570235	-0.118053573	N
0.701298701	4.056681517	0.009920757	0.016995967	0.013591228	0.013384285	0.086	0.384	0.203	0.209608696	0	0.731058579	0.952574127	0.880797078	0.130567948	-0.47603139	N
0.819354839	3.264281691	0.00849223	0.082478167	0.012389241	0.015381916	0.059	0.85	0.423	0.435173913	0	0.731058579	0.952574127	0.880797078	0.148117539	-0.458481799	N
0.711111111	4.39588889	0.00849223	0.082478167	0.012389241	0.015381916	0.059	0.85	0.423	0.435173913	0	0.731058579	0.952574127	0.880797078	0.148117539	-0.458481799	N
0.696629213	2.765461478	0.004554989	0.019953467	0.011416676	0.011363336	0.024	1	0.437	0.391217391	0.00021462	0.731058579	0.98201379	0.952574127	0.087039309	-0.08641948	N
0.816666667	2.681537905	0.004950284	0.008395187	0.00678895	0.006602463	0.026	0.065	0.056	0.05526087	0.001727116	0.880797078	0.952574127	0.952574127	0.064665019	-0.54193432	N
0.798780488	0.988537274	0.005741653	0.010975318	0.00744859	0.007814492	0.109	0.442	0.368	0.346	0.000691802	0.880797078	0.952574127	0.880797078	0.120457333	-0.486142005	N
0.798672566	3.293283591	0.006357347	0.012562011	0.0093426	0.00923544	0.128	0.498	0.418	0.400565217	0.001537722	0.731058579	0.952574127	0.880797078	0.154508667	-0.452090671	N
0.68627451	5.717661793	0.004604102	0.008232833	0.006179561	0.006065153	0.319	0.729	0.649	0.612043478	0.001910254	0.731058579	0.880797078	0.880797078	0.145445899	-0.46115344	N
0.706666667	3.289296804	0.005858247	0.012960228	0.008159648	0.008493118	0.056	0.537	0.411	0.390608696	0	0.731058579	0.952574127	0.880797078	0.119933409	-0.249112696	N
0.68452381	1.857855146	0.007007709	0.019953467	0.011361211	0.01146649	0.062	0.641	0.451	0.418573123	0.000324391	0.731058579	0.98201379	0.880797078	0.094996022	-0.093556098	N
0.758293839	4.220461275	0.007945488	0.019492652	0.011512754	0.011722138	0.117	0.593	0.361	0.343402174	0	0.880797078	0.98201379	0.952574127	0.069367348	-0.202289195	N
0.813559322	1.465944332	0.0074516	0.134526212	0.011499052	0.015109631	0.049	0.848	0.429	0.393937888	0.000276078	0.731058579	0.952574127	0.880797078	0.135881502	-0.141113554	N
0.711111111	2.784982998	0.005945657	0.098510329	0.080408172	0.061682896	0.216	0.826	0.691	0.652369565	0.001879793	0.731058579	0.952574127	0.880797078	0.234581695	-0.213987504	N
0.727722772	3.846586721	0.00782962	0.019803172	0.011832249	0.011985484	0.07	0.641	0.466	0.413804348	8.51739E-05	0.731058579	0.98201379	0.952574127	0.094033975	-0.108134086	N
0.716	3.633223391	0.008459971	0.092354724	0.010960536	0.014809806	0.08	0.787	0.493	0.485869565	0.002718063	0.731058579	0.880797078	0.880797078	0.185888361	-0.420710977	N
0.660792952	2.737133725	0.009686368	0.019841081	0.013011174	0.013056553	0.128	0.599	0.454	0.434434783	0.000532269	0.880797078	0.952574127	0.880797078	0.120457333	-0.249596913	N
0.843575419	2.734418637	0.006700379	0.016900335	0.010257007	0.010351044	0.106	0.657	0.21	0.32723913	0.001499337	0.731058579	0.952574127	0.880797078	0.119409486	-0.329159713	N
0.781094527	3.567058773	0.006772766	0.064739798	0.009830299	0.012306361	0.056	0.793	0.401	0.418086957	0	0.731058579	0.880797078	0.880797078	0.195998977	-0.410600362	N
0.82300885	2.853517636	0.00677905	0.08152149	0.010373087	0.010966929	0.029	0.831	0.082	0.150617391	0	0.731058579	0.952574127	0.880797078	0.101335971	-0.267710134	N
0.466063348	2.933276317	0.009686368	0.019841081	0.013011174	0.013056553	0.128	0.599	0.454	0.434434783	0.000532269	0.880797078	0.952574127	0.880797078	0.120457333	-0.249596913	N
0.843636364	3.468558613	0.006748394	0.024873164	0.011968791	0.012394922	0.06	0.868	0.4815	0.462434783	0.000946526	0.731058579	0.98201379	0.880797078	0.117186372	-0.077108819	N
0.823809524	4.400272134	0.005741653	0.018877672	0.010050447	0.010187933	0.109	0.633	0.43	0.423504348	0.001619612	0.880797078	0.98201379	0.880797078	0.097319413	-0.139460538	N
0.702830189	2.815941733	0.009720902	0.022123927	0.013888777	0.01384623	0.084	0.633	0.471	0.459231884	0.001037883	0.880797078	0.952574127	0.880797078	0.120457333	-0.223758673	N
0.750957854	3.155186118	0.005531744	0.08152149	0.011959408	0.013784917	0.058	0.831	0.4785	0.443273913	0.001314325	0.731058579	0.98201379	0.880797078	0.112951666	-0.084527844	N
0.852071006	2.544695075	0.006714873	0.092354724	0.012063315	0.012664067	0.06	0.849	0.459	0.413900621	0.001536049	0.731058579	0.98201379	0.880797078	0.130454752	-0.1045903	N
0.68	3.657613201	0.006772766	0.064739798	0.011358211	0.012967704	0.056	0.793	0.491	0.454804348	0	0.731058579	0.952574127	0.880797078	0.178973309	-0.21145985	N
0.785087719	3.002536258	0.004736202	0.095892958	0.007956182	0.017176463	0	0	0	0	0.00290794	0.731058579	0.952574127	0.952574127	0.115977971	-0.104832596	N
0.690821256	1.299564339	0.006226081	0.014494326	0.009398795	0.009692085	0.016	0.672	0.0475	0.280108696	0.001729676	0.731058579	0.952574127	0.880797078	0.153172847	-0.237260312	N
0.822115385	4.742756993	0.007445714	0.022384266	0.012679535	0.013093102	0.083	0.855	0.49	0.524130435	0.000540599	0.880797078	0.98201379	0.880797078	0.100163958	-0.199203094	N
0.742857143	4.299624654	0.008568239	0.020211302	0.012936292	0.013592083	0	0	0	0	0	0.880797078	0.952574127	0.880797078	0.118597589	-0.27183557	N
0.742424242	3.655932627	0.008201952	1	0.01255157	0.027472466	0.077	1	0.25	0.335492754	0.000494254	0.5	0.952574127	0.880797078	0.134228535	-0.184149231	N
0.668224299	5.238362225	0.006701738	0.012646604	0.00967564	0.009572492	0.039	0.57	0.08	0.194304348	0	0.731058579	0.952574127	0.880797078	0.138006924	-0.468592415	N
0.696969697	0.947689229	0.004680047	0.020581137	0.007982819	0.008285188	0.032	0.604	0.321	0.30425	0.000106465	0.731058579	0.98201379	0.880797078	0.102642534	-0.113727582	N
0.691964286	2.001986841	0.005273166	0.019803172	0.010588564	0.010937752	0.017	0.636	0.457	0.398670807	0.000195329	0.731058579	0.98201379	0.880797078	0.099814676	-0.147545121	N
0.706484642	4.147478113	0.005381722	0.013358014	0.008872436	0.008663222	0.112	0.659	0.495	0.478768116	0.000576646	0.880797078	0.952574127	0.880797078	0.130375966	-0.265516519	N
0.741525424	2.47163022	0.006367547	0.023840057	0.012039261	0.012163402	0.022	0.554	0.099	0.202014493	0	0.880797078	0.952574127	0.952574127	0.086981944	-0.282064161	N
0.797752809	1.88008135	0.00543961	0.010845042	0.007102912	0.007424704	0.063	0.705	0.547	0.520391304	0	0.880797078	0.952574127	0.880797078	0.131615796	-0.474983543	N
0.798657718	1.244216296	0.006226081	0.013149401	0.008826054	0.009101389	0.016	0.782	0.049	0.253282609	0.001037703	0.731058579	0.952574127	0.880797078	0.131091872	-0.259341287	N
0.7578125	3.55430753	0.00799742	0.019803172	0.011154591	0.011422831	0.128	0.636	0.514	0.482971014	0.000188733	0.880797078	0.98201379	0.952574127	0.06871212	-0.301342125	N
0.748953975	2.000990765	0.006701738	0.029764452	0.010962566	0.012348594	0.052	0.639	0.436	0.395583851	0.000417586	0.731058579	0.993307149	0.952574127	0.080338615	-0.133157694	N
0.808035714	1.241366346	0.005574118	0.015510817	0.008435317	0.008984721	0.07	0.628	0.419	0.398014493	0.000288268	0.880797078	0.952574127	0.952574127	0.083262457	-0.203102412	N
0.426605505	2.996827465	0.007846831	0.101651982	0.012086939	0.013771221	0.059	0.85	0.473	0.466797101	0.001153361	0.731058579	0.952574127	0.880797078	0.148232728	-0.114958632	N
0.804651163	5.282962846	0.006701738	0.017153632	0.010307328	0.010512912	0.052	0.57	0.3715	0.371673913	0	0.731058579	0.98201379	0.952574127	0.09116035	-0.277885755	N
0.78125	3.568698427	0.007890774	0.023351924	0.012401415	0.012592095	0.063	0.641	0.514	0.483673913	0.000583251	0.731058579	0.98201379	0.880797078	0.101661801	-0.125517014	N
0.689189189	2.078015597	0.00441631	0.054532229	0.009265014	0.011167894	0.02	0.825	0.4	0.345765886	0.000308249	0.731058579	0.98201379	0.880797078	0.097296715	-0.085166303	N
0.666666667	1.108940402	0.006941365	0.029927897	0.019824221	0.01785294	0.072	0.592	0.474	0.454521739	0.000471772	0.731058579	0.952574127	0.880797078	0.106469929	-0.192897122	N
0.739130435	2.195593149	0.00804061	0.01598701	0.012437184	0.012038084	0.128	0.342	0.231	0.243130435	0.000576535	0.880797078	0.952574127	0.952574127	0.079542969	-0.527056369	N
0.814655172	3.694680928	0.006876034	0.026772551	0.013155778	0.013496019	0.065	0.615	0.241	0.298652174	9.61076E-05	0.731058579	0.952574127	0.880797078	0.125067367	-0.193310399	N
0.905882353	2.871425453	0.009686368	0.019841081	0.013011174	0.013056553	0.128	0.599	0.454	0.434434783	0.000532269	0.880797078	0.952574127	0.880797078	0.120457333	-0.249596913	N
0.742268041	10.35004299	0.007924485	0.018614729	0.011414349	0.011700267	0.093	0.427	0.1965	0.243413043	0.000384394	0.880797078	0.952574127	0.880797078	0.120457333	-0.486142005	N
0.663507109	3.99783192	0.009079365	0.081126632	0.011778571	0.014968425	0.099	0.764	0.385	0.408434783	0.000864678	0.731058579	0.880797078	0.880797078	0.16566713	-0.440932208	N
0.763157895	2.672821705	0.009686368	0.019841081	0.013011174	0.013056553	0.128	0.599	0.454	0.434434783	0.000532269	0.880797078	0.952574127	0.880797078	0.120457333	-0.249596913	N
0.756097561	2.072379836	0.008177446	0.01701786	0.012390702	0.01242568	0.095	0.464	0.289	0.281695652	0.008635579	0.952574127	0.98201379	0.952574127	0.044313776	-0.562285562	N
0.278911565	2.847206207	0.006677514	0.015284952	0.010462449	0.010677473	0.029	0.537	0.084	0.238184783	0	0.880797078	0.98201379	0.952574127	0.056127467	-0.226740577	N
0.756329114	0.93231046	0.006359506	0.014488525	0.010198182	0.010277574	0.129	0.774	0.564	0.545086957	0.000345991	0.731058579	0.952574127	0.880797078	0.131266513	-0.238787732	N
0.643312102	1.459552459	0.007890774	0.019019279	0.012400447	0.012735625	0.128	0.615	0.475	0.457101449	0.00021293	0.731058579	0.952574127	0.880797078	0.129869384	-0.204841265	N
0.726495726	1.9764773	0.005849904	0.019841081	0.012060058	0.01172722	0.073	0.645	0.423	0.418315217	0.000610563	0.880797078	0.952574127	0.880797078	0.122317077	-0.189101013	N
0.673076923	4.080764719	0.005849904	0.010014823	0.008143057	0.007739221	0.073	0.645	0.374	0.369956522	0.000864678	0.880797078	0.952574127	0.880797078	0.127896308	-0.47870303	N
0.777227723	3.391035446	0.006772766	0.064739798	0.009830299	0.012306361	0.056	0.793	0.401	0.418086957	0	0.731058579	0.880797078	0.880797078	0.195998977	-0.410600362	N
0.801169591	1.282977858	0.006226081	0.021557698	0.010802119	0.011745288	0.016	0.454	0.1175	0.151108696	0	0.880797078	0.952574127	0.880797078	0.101859895	-0.267186211	N
0.707762557	2.383817637	0.005741653	0.017738831	0.01072754	0.010449306	0.109	0.681	0.412	0.440413043	0.000314515	0.880797078	0.98201379	0.952574127	0.083753878	-0.306679282	N
0.695906433	1.334008936	0.009981436	0.019210467	0.012808852	0.01308967	0.128	0.625	0.49	0.462391304	0.000988509	0.731058579	0.952574127	0.880797078	0.134287436	-0.472311902	N
0.724299065	3.746116393	0.007311959	0.019890867	0.010938412	0.011356551	0.062	0.628	0.425	0.380768116	0.000198531	0.880797078	0.98201379	0.880797078	0.094147255	-0.154097534	N
0.70952381	1.974543442	0.007561402	0.020533117	0.011734051	0.011991618	0.093	0.628	0.437	0.412048055	0.000146895	0.731058579	0.98201379	0.952574127	0.088808981	-0.081115145	N
0.803571429	3.108302784	0.006566954	0.017012258	0.011939137	0.012013945	0.09	0.588	0.4585	0.434217391	0.001729676	0.731058579	0.993307149	0.952574127	0.078502303	-0.282675945	N
0.789473684	1.30263824	0.009832205	0.020722783	0.014287336	0.014129381	0.054	0.789	0.4725	0.467804348	0.002422085	0.731058579	0.952574127	0.880797078	0.149977283	-0.240455876	N
0.735294118	1.438704335	0.005555625	1	0.065374172	0.070253535	0.152	1	0.713	0.672	0.000920012	0.5	0.952574127	0.880797078	0.171011856	-0.055790127	N
0.702439024	2.174073335	0.008201952	0.028506887	0.012380637	0.01386452	0.077	0.689	0.468	0.417217391	0.000345961	0.880797078	0.952574127	0.880797078	0.122936991	-0.221279015	N
0.63592233	3.541993419	0.008652165	0.01584042	0.01139839	0.011422245	0.115	0.308	0.236	0.234956522	0	0.731058579	0.952574127	0.952574127	0.100812048	-0.505787291	N
0.6692607	2.201958096	0.006367547	0.021015821	0.011582837	0.011622286	0.022	0.568	0.084	0.239543478	0	0.880797078	0.98201379	0.952574127	0.054682138	-0.30649611	N
0.678217822	1.878634588	0.00782962	0.029646629	0.011865842	0.013732897	0.064	0.655	0.406	0.362202899	0.000254414	0.880797078	0.952574127	0.880797078	0.120457333	-0.269975826	N
0.706161137	2.64221633	0.005728064	0.140281345	0.011736629	0.013488552	0.059	0.85	0.459	0.424951691	0.001009198	0.731058579	0.952574127	0.880797078	0.14531107	-0.104463226	N
0.771653543	3.441170159	0.006772766	0.064739798	0.012217004	0.012941817	0	0	0	0	0	0.731058579	0.952574127	0.880797078	0.138390888	-0.170481521	N
0.731914894	2.785183964	0.008459971	0.092354724	0.010960536	0.014809806	0.08	0.787	0.493	0.485869565	0.002718063	0.731058579	0.880797078	0.880797078	0.185888361	-0.420710977	N
0.808743169	2.831892064	0.006367547	0.023840057	0.013278466	0.013207824	0.022	0.573	0.4155	0.336967391	0	0.880797078	0.98201379	0.952574127	0.071761913	-0.181887375	N
0.760204082	3.326219454	0.007890774	0.019019279	0.012531755	0.012834407	0.128	0.615	0.49	0.466043478	0.000305297	0.731058579	0.952574127	0.880797078	0.140678564	-0.249754595	N
0.837719298	3.622124951	0.009079365	0.081126632	0.011778571	0.014968425	0.099	0.764	0.385	0.408434783	0.000864678	0.731058579	0.880797078	0.880797078	0.16566713	-0.440932208	N
0.722222222	2.640807941	0.008404763	0.082478167	0.012211378	0.013264638	0.057	0.85	0.401	0.353043478	0	0.731058579	0.952574127	0.880797078	0.134287436	-0.256145723	N
0.6875	3.736930667	0.007561402	0.020533117	0.011995824	0.012193992	0.128	0.619	0.456	0.448826087	0.000337574	0.880797078	0.98201379	0.952574127	0.08670828	-0.163759386	N
0.844660194	2.092228355	0.00441631	0.054532229	0.008827557	0.009775639	0.02	0.825	0.415	0.376286957	0.000261271	0.731058579	0.98201379	0.880797078	0.102047821	-0.090087693	N
0.733333333	2.26149424	0.005741653	0.018877672	0.009567068	0.010125967	0.109	0.633	0.4065	0.406717391	0.001210863	0.880797078	0.98201379	0.952574127	0.08492946	-0.284116646	N
0.737179487	1.725625188	0.005673576	0.081126632	0.012328117	0.013723508	0.055	0.764	0.359	0.319234783	0.000613874	0.731058579	0.952574127	0.880797078	0.140238616	-0.129796602	N
0.673469388	2.24958412	0.005426612	0.013389039	0.008956385	0.008960109	0.085	1	0.522	0.677152174	0.00098857	0.880797078	0.952574127	0.880797078	0.120457333	-0.269975826	N
0.875	4.876188783	0.006712833	0.019072872	0.01111475	0.011473824	0.046	1	0.369	0.410034783	0.000390647	0.880797078	0.952574127	0.880797078	0.10929887	-0.157010909	N
0.690376569	4.684449514	0.006781675	0.043926279	0.029356581	0.026598998	0.186	0.378	0.294	0.293956522	0.00057659	0.880797078	0.952574127	0.880797078	0.12417682	-0.482422518	N
0.790055249	2.703752085	0.008987591	0.01653802	0.012615735	0.012406122	0.128	0.641	0.529	0.507304348	0	0.880797078	0.952574127	0.880797078	0.101859895	-0.504739444	N
0.764423077	2.906743265	0.004595362	0.019841081	0.011051377	0.011155832	0.062	1	0.4435	0.463006211	0.000315228	0.731058579	0.98201379	0.952574127	0.0910967	-0.093110187	N
0.776595745	2.47124413	0.006813339	0.146429373	0.01286492	0.020222539	0.054	0.81	0.5465	0.568782609	0.002594782	0.731058579	0.952574127	0.880797078	0.163807386	-0.226625773	N
0.737113402	2.751191516	0.005850419	0.019543643	0.01139405	0.011521953	0.094	0.67	0.55	0.522643478	0.000733554	0.731058579	0.952574127	0.880797078	0.150024473	-0.138614277	N
0.776315789	3.339880341	0.009920757	0.016995967	0.013591228	0.013384285	0.086	0.384	0.203	0.209608696	0	0.731058579	0.952574127	0.880797078	0.130567948	-0.47603139	N
0.74691358	3.963012811	0.007233136	0.014042695	0.010156193	0.010126004	0.057	0.811	0.5865	0.556043478	0.001297531	0.731058579	0.880797078	0.731058579	0.271828593	-0.176740605	N
0.762886598	0.912357304	0.007754811	0.015261095	0.010670844	0.010663417	0.109	0.746	0.198	0.347043478	0	0.731058579	0.952574127	0.880797078	0.108774946	-0.281658213	N
0.654545455	2.238466533	0.004950284	0.027603738	0.011698022	0.011924535	0.026	0.628	0.371	0.3299699	0.000458911	0.731058579	0.98201379	0.952574127	0.076693123	-0.101973015	N
0.657894737	3.520036772	0.008662631	0.019780707	0.01229446	0.01260682	0.037	0.585	0.102	0.22251087	0.000519013	0.731058579	0.98201379	0.952574127	0.083588286	-0.19190874	N
0.774566474	1.452533907	0.007662309	0.027603738	0.013208752	0.014062659	0.058	0.619	0.486	0.467188406	0.000946987	0.731058579	0.952574127	0.880797078	0.100270783	-0.243945223	N
0.734615385	3.503017271	0.006123364	0.009925071	0.008468686	0.008333163	0.121	0.613	0.52	0.507304348	0.001297017	0.731058579	0.952574127	0.880797078	0.151837027	-0.454762312	N
0.695833333	3.62689458	0.006124906	0.017757049	0.010247143	0.010817927	0.048	1	0.517	0.530357143	0.00055809	0.731058579	0.98201379	0.880797078	0.106944267	-0.081326559	N
0.701030928	3.69373786	0.005741653	0.017553214	0.010272478	0.010528357	0.08	0.66	0.4235	0.435826087	0.000576535	0.880797078	0.952574127	0.880797078	0.107439126	-0.261606979	N
0.681415929	2.813389611	0.007661363	0.017776588	0.011625715	0.01176908	0.029	0.587	0.415	0.362695652	0.000576369	0.880797078	0.952574127	0.952574127	0.088221774	-0.201639921	N
0.734567901	1.450261056	0.006414063	0.024393252	0.012185301	0.012729976	0.061	0.501	0.255	0.252108696	8.87193E-05	0.731058579	0.952574127	0.880797078	0.128302256	-0.168581823	N
0.755	3.052632974	0.009686368	0.031617343	0.013913863	0.014313752	0.128	0.599	0.457	0.441445652	0.001153292	0.731058579	0.952574127	0.880797078	0.11461614	-0.186108423	N
0.800813008	3.964720548	0.006709287	0.011661723	0.009561996	0.009359395	0.094	0.644	0.53	0.505130435	0	0.880797078	0.952574127	0.952574127	0.083262457	-0.523336882	N
0.783783784	3.046733982	0.006556147	0.017882006	0.011678191	0.011913285	0.059	1	0.5825	0.618119565	0.001892199	0.731058579	0.952574127	0.880797078	0.142132359	-0.129524183	N
0.753012048	2.298130417	0.00441631	0.01901535	0.006924641	0.007861566	0.02	0.556	0.371	0.296875776	0.000328062	0.731058579	0.952574127	0.952574127	0.086832252	-0.11933556	N
0.694300518	2.922782514	0.008657882	0.076065561	0.012085044	0.013830685	0.07	0.739	0.4825	0.469826087	0.001100889	0.731058579	0.952574127	0.880797078	0.139866667	-0.250566492	N
0.863905325	2.015670765	0.010750331	0.020771063	0.015744002	0.015930861	0.078	0.589	0.498	0.466521739	0.001976773	0.952574127	0.98201379	0.952574127	0.048418745	-0.558180593	N
0.846456693	2.393627465	0.00826531	0.081249049	0.012412745	0.013423826	0.059	0.728	0.132	0.174681159	0.000864803	0.731058579	0.98201379	0.880797078	0.097206523	-0.202160528	N
0.720670391	2.839636245	0.01148194	0.024393252	0.01724815	0.017439219	0.061	0.467	0.288	0.292304348	0	0.880797078	0.952574127	0.880797078	0.116737845	-0.489861493	N
0.692307692	1.8095434	0.009720902	0.016566968	0.013428331	0.013154466	0.128	0.599	0.4555	0.43623913	0.000864865	0.880797078	0.952574127	0.880797078	0.122317077	-0.326252122	N
0.725868726	4.023165848	0.007030082	0.014414305	0.010081035	0.010288196	0.118	0.652	0.4855	0.485108696	0.000864304	0.880797078	0.98201379	0.952574127	0.066823443	-0.323609717	N
0.795180723	1.42187639	0.005696399	0.012134802	0.008412842	0.008553141	0.082	0.664	0.488	0.473391304	0.002306539	0.880797078	0.952574127	0.880797078	0.12417682	-0.266256339	N
0.720430108	2.081625807	0.00692189	0.012934475	0.00990999	0.010027599	0.064	0.532	0.416	0.402217391	0.000864304	0.880797078	0.952574127	0.952574127	0.053506556	-0.553092782	N
0.762886598	4.705179553	0.004554989	0.023840057	0.01105414	0.01104484	0.024	0.601	0.342	0.298729469	0.000616462	0.731058579	0.98201379	0.952574127	0.089041104	-0.101080287	N
0.730769231	3.373838684	0.00758332	0.151667135	0.012513778	0.01490764	0.049	0.848	0.4175	0.393	0.000322376	0.731058579	0.98201379	0.880797078	0.117393124	-0.07864192	N
0.785087719	1.117885194	0.00799742	0.019803172	0.011154591	0.011422831	0.128	0.636	0.514	0.482971014	0.000188733	0.880797078	0.98201379	0.952574127	0.06871212	-0.301342125	N
0.757062147	0.8900088	0.009981436	0.019210467	0.012808852	0.01308967	0.128	0.625	0.49	0.462391304	0.000988509	0.731058579	0.952574127	0.880797078	0.134287436	-0.472311902	N
0.756880734	2.727136404	0.007890774	0.019019279	0.012531755	0.012834407	0.128	0.615	0.49	0.466043478	0.000305297	0.731058579	0.952574127	0.880797078	0.140678564	-0.249754595	N
0.753799392	5.096839502	0.013375855	0.026511438	0.021050861	0.02044597	0.124	0.64	0.552	0.528086957	0	0.880797078	0.952574127	0.880797078	0.127896308	-0.47870303	N
0.708695652	2.295479611	0.008459971	0.092354724	0.011520975	0.013779541	0.077	0.787	0.5	0.483782609	0.002718063	0.731058579	0.952574127	0.880797078	0.149453359	-0.2409798	N
0.766666667	3.538623275	0.008325878	0.01653802	0.0122556	0.012184899	0.097	0.641	0.513	0.482413043	0.00017298	0.880797078	0.952574127	0.880797078	0.09442092	-0.266757328	N
0.761658031	2.726766759	0.007890774	0.019019279	0.012531755	0.012834407	0.128	0.615	0.49	0.466043478	0.000305297	0.731058579	0.952574127	0.880797078	0.140678564	-0.249754595	N
0.733031674	0.648132179	0.009981436	0.019210467	0.012808852	0.01308967	0.128	0.625	0.49	0.462391304	0.000988509	0.731058579	0.952574127	0.880797078	0.134287436	-0.472311902	N
0.690721649	2.253512944	0.007890774	0.019019279	0.012345115	0.01255044	0.128	0.615	0.468	0.452086957	0.000137036	0.731058579	0.952574127	0.880797078	0.11197051	-0.145576045	N
0.808290155	1.020657015	0.005741653	0.010975318	0.00744859	0.007814492	0.109	0.442	0.368	0.346	0.000691802	0.880797078	0.952574127	0.880797078	0.120457333	-0.486142005	N
0.755	2.428883449	0.009686368	0.019841081	0.013011174	0.013056553	0.128	0.599	0.454	0.434434783	0.000532269	0.880797078	0.952574127	0.880797078	0.120457333	-0.249596913	N
0.709821429	1.069626256	0.006162824	0.082478167	0.010858882	0.012423115	0.052	0.85	0.27	0.338507246	0.000508802	0.731058579	0.952574127	0.880797078	0.149720523	-0.107591	N
0.64516129	2.662651225	0.008983144	0.019890867	0.013380348	0.013535043	0.071	0.321	0.103	0.135565217	0	1	0				N
0.659793814	4.144249528	0.006709287	0.011661723	0.009561996	0.009359395	0.094	0.644	0.53	0.505130435	0	0.880797078	0.952574127	0.952574127	0.083262457	-0.523336882	N
0.819767442	8.514492172	0.008066093	0.0172703	0.011526247	0.011863903	0.093	0.647	0.427	0.412695652	0.000704812	0.880797078	0.952574127	0.952574127	0.085742115	-0.232635651	N
0.71641791	3.737239296	0.008332167	0.017555228	0.010950167	0.012095486	0.088	0.63	0.496	0.471478261	0.002075765	0.731058579	0.880797078	0.880797078	0.145445899	-0.46115344	N
0.829787234	4.152937249	0.00715272	0.01356975	0.009289709	0.009740443	0.066	0.677	0.592	0.560434783	0.000576369	0.731058579	0.880797078	0.880797078	0.206109592	-0.400489746	N
0.75	2.453391744	0.008534235	0.015402288	0.01112798	0.01154595	0.174	0.614	0.534	0.507956522	0	0.880797078	0.952574127	0.880797078	0.12417682	-0.482422518	N
0.777777778	4.682878199	0.006012598	0.012031587	0.008221824	0.008329077	0.02	0.056	0.048	0.046173913	0.001976773	0.880797078	0.952574127	0.952574127	0.053506556	-0.553092782	N
0.71969697	1.346418081	0.005555625	1	0.063094884	0.074283411	0.152	1	0.711	0.674233696	0.001055359	0.5	0.952574127	0.880797078	0.176938409	-0.065904126	N
0.886904762	1.089490316	0.005945657	0.359142356	0.072698414	0.075526091	0.055	0.976	0.664	0.645556522	0.001844573	0.731058579	0.952574127	0.880797078	0.169292237	-0.110044747	N
0.76744186	1.80439895	0.00543961	0.010845042	0.007102912	0.007424704	0.063	0.705	0.547	0.520391304	0	0.880797078	0.952574127	0.880797078	0.131615796	-0.474983543	N
0.700483092	1.936855701	0.008220849	0.018145129	0.011337016	0.011556666	0.093	0.605	0.4	0.390426087	0.000397067	0.880797078	0.98201379	0.952574127	0.067760081	-0.192973371	N
0.849740933	3.144701625	0.007872947	0.030229959	0.014722064	0.015674635	0.074	0.6	0.4995	0.476608696	0.002594034	0.880797078	0.952574127	0.880797078	0.111158614	-0.279274545	N
0.770700637	3.479239396	0.005696399	0.01620582	0.009072877	0.009643904	0.082	0.664	0.5	0.483	0.001992136	0.731058579	0.952574127	0.880797078	0.134636718	-0.183741048	N
0.785714286	1.097291804	0.006226081	0.01069418	0.008460729	0.008354023	0.016	0.044	0.038	0.036565217	0	0.880797078	0.952574127	0.880797078	0.120457333	-0.486142005	N
0.801104972	2.238841869	0.008652165	0.01584042	0.01139839	0.011422245	0.115	0.308	0.236	0.234956522	0	0.731058579	0.952574127	0.952574127	0.100812048	-0.505787291	N
0.755102041	2.238748654	0.00826531	0.018471091	0.011510757	0.011957353	0.093	0.302	0.121	0.153347826	0.001729107	0.880797078	0.952574127	0.880797078	0.120457333	-0.486142005	N
0.64673913	2.200323904	0.009157231	0.020368703	0.012219571	0.012463739	0.093	0.608	0.3	0.32223913	0	0.880797078	0.98201379	0.952574127	0.072595415	-0.23534943	N
0.746478873	3.58774301	0.006162824	0.082478167	0.01125728	0.012746387	0.056	0.85	0.417	0.386669565	0.00100452	0.731058579	0.98201379	0.880797078	0.129595571	-0.078112453	N
0.859531773	2.774082344	0.007729694	0.016037305	0.010212361	0.010382705	0.061	0.587	0.477	0.453271739	0	0.880797078	0.952574127	0.880797078	0.122317077	-0.247237052	N
0.76371308	1.821779004	0.004632759	0.020581137	0.008432417	0.008946408	0.042	0.636	0.448	0.426434783	0.000349099	0.731058579	0.98201379	0.952574127	0.094900763	-0.096280219	N
0.791855204	2.240111984	0.00543961	0.010845042	0.007102912	0.007424704	0.063	0.705	0.547	0.520391304	0	0.880797078	0.952574127	0.880797078	0.131615796	-0.474983543	N
0.802139037	1.621395486	0.007662309	0.020368703	0.01186902	0.011965183	0.093	0.641	0.464	0.429549689	0.000126312	0.731058579	0.98201379	0.952574127	0.078616021	-0.099963963	N
0.769953052	2.404302377	0.006700379	0.018340971	0.010791386	0.0112624	0.106	0.657	0.428	0.364478261	0.001874189	0.731058579	0.952574127	0.880797078	0.104880818	-0.220324474	N
0.818181818	2.138428775	0.00804061	0.01598701	0.012437184	0.012038084	0.128	0.342	0.231	0.243130435	0.000576535	0.880797078	0.952574127	0.952574127	0.079542969	-0.527056369	N
0.718232044	3.022280658	0.007890774	0.019019279	0.012400447	0.012735625	0.128	0.615	0.475	0.457101449	0.00021293	0.731058579	0.952574127	0.880797078	0.129869384	-0.204841265	N
0.713333333	2.766942461	0.009686368	0.022123927	0.012743536	0.013589278	0.084	0.633	0.471	0.459231884	0.000864865	0.880797078	0.952574127	0.880797078	0.119217504	-0.199160262	N
0.855614973	2.090150852	0.008220849	0.018145129	0.011520859	0.011580499	0.093	0.605	0.3985	0.388097826	0.000510147	0.880797078	0.98201379	0.952574127	0.073621657	-0.208728413	N
0.763157895	1.809668949	0.00826531	0.018471091	0.012178714	0.012075969	0.093	0.641	0.4825	0.408521739	0.00062473	0.880797078	0.98201379	0.952574127	0.091289223	-0.18036732	N
0.783410138	7.534034916	0.007872947	0.017059084	0.009902138	0.010222817	0.074	0.598	0.499	0.474304348	0.003454231	0.880797078	0.952574127	0.880797078	0.101859895	-0.504739444	N
0.773755656	2.426692302	0.008067722	0.020247143	0.011752684	0.012078636	0.066	0.339	0.298	0.283391304	0	0.880797078	0.952574127	0.952574127	0.064665019	-0.54193432	N
0.759656652	2.795403437	0.003367511	0.008395187	0.004896143	0.005193259	0.026	0.577	0.371	0.301956522	0.000741436	0.880797078	0.952574127	0.880797078	0.103099724	-0.231610925	N
0.711462451	2.913466184	0.005273166	0.008634196	0.00656222	0.006712214	0.05	0.59	0.483	0.467956522	0.001727116	0.731058579	0.952574127	0.880797078	0.138006924	-0.468592415	N
0.666666667	3.664075233	0.006355273	0.02091672	0.010706459	0.010988119	0.093	0.531	0.213	0.25316087	0.000100088	0.731058579	0.98201379	0.952574127	0.089976581	-0.098559683	N
0.805882353	2.939236115	0.004936685	0.008747152	0.006791517	0.006657707	0.051	0.474	0.337	0.334826087	0	0.880797078	0.952574127	0.952574127	0.064665019	-0.54193432	N
0.780487805	1.363217398	0.004955095	0.076065561	0.009440503	0.010833189	0.049	0.739	0.4	0.384717391	0.000943545	0.731058579	0.98201379	0.92414182	0.094879838	-0.274166268	N
0.805104408	2.729117582	0.008724128	0.019543643	0.012100952	0.012241211	0.094	0.646	0.528	0.496843478	0.000968825	0.731058579	0.98201379	0.880797078	0.101846894	-0.148620772	N
0.75	4.182137008	0.008604261	0.430389864	0.041896038	0.044691374	0.25	0.833	0.703	0.651304348	0.001162137	0.731058579	0.880797078	0.880797078	0.195998977	-0.174055269	N
0.736040609	4.874828227	0.007150073	0.014042695	0.010026801	0.009982781	0.057	0.811	0.5685	0.534847826	0.001475602	0.731058579	0.952574127	0.880797078	0.214360464	-0.176072695	N
0.686170213	1.805380497	0.006709287	0.011661723	0.009561996	0.009359395	0.094	0.644	0.53	0.505130435	0	0.880797078	0.952574127	0.952574127	0.083262457	-0.523336882	N
0.752525253	1.710070578	0.00849223	0.082478167	0.014480883	0.01670162	0.059	0.85	0.455	0.452195652	0	0.731058579	0.952574127	0.880797078	0.11197051	-0.257075595	N
0.817813765	3.124048602	0.005273166	0.012545882	0.00749328	0.007647302	0.05	0.59	0.478	0.461086957	0.001729107	0.731058579	0.952574127	0.880797078	0.135876548	-0.182501218	N
0.879746835	3.648007778	0.006772766	0.064739798	0.009830299	0.012306361	0.056	0.793	0.401	0.418086957	0	0.731058579	0.880797078	0.880797078	0.195998977	-0.410600362	N
0.742857143	2.969030054	0.007030082	0.016678908	0.011912098	0.011574479	0.093	0.569	0.301	0.295521739	0.000691802	0.880797078	0.98201379	0.952574127	0.067507604	-0.293670644	N
0.813559322	3.526923968	0.006162824	0.092354724	0.010386366	0.012616749	0.06	0.821	0.505	0.498434783	0.001638896	0.731058579	0.880797078	0.880797078	0.189258566	-0.180795679	N
0.76635514	3.728149325	0.006162824	0.092354724	0.010931056	0.012819437	0.056	0.821	0.474	0.43192029	0.001482824	0.731058579	0.952574127	0.880797078	0.175358607	-0.109858215	N
0.891566265	1.315338542	0.007561402	0.020533117	0.011901031	0.012089632	0.093	0.641	0.442	0.417570652	0.000108336	0.731058579	0.98201379	0.952574127	0.082096405	-0.077498095	N
0.741935484	1.397195094	0.006905611	0.01425575	0.009384484	0.009412274	0.064	0.57	0.206	0.278456522	0.000494193	0.880797078	0.952574127	0.880797078	0.096280663	-0.294152496	N
0.864864865	1.831445149	0.009981436	0.019210467	0.012808852	0.01308967	0.128	0.625	0.49	0.462391304	0.000988509	0.731058579	0.952574127	0.880797078	0.134287436	-0.472311902	N
0.73877551	2.926419391	0.008384869	0.016091183	0.011111541	0.011612002	0.072	0.596	0.501	0.471869565	0.002075765	0.880797078	0.952574127	0.880797078	0.131615796	-0.474983543	N
0.698795181	2.841404553	0.009720902	0.016566968	0.013428331	0.013154466	0.128	0.599	0.4555	0.43623913	0.000864865	0.880797078	0.952574127	0.880797078	0.122317077	-0.326252122	N
0.792	3.067459886	0.006700379	0.023351924	0.012650781	0.013090378	0.063	1	0.585	0.644188406	0.001646091	0.731058579	0.952574127	0.880797078	0.145096616	-0.17328115	N
0.81773399	2.122362881	0.008323294	0.017536534	0.011416597	0.011694004	0.066	0.653	0.504	0.48123913	0.001029781	0.731058579	0.880797078	0.880797078	0.150501207	-0.298067992	N
0.7	6.162689532	0.006781675	0.043926279	0.029356581	0.026598998	0.186	0.378	0.294	0.293956522	0.00057659	0.880797078	0.952574127	0.880797078	0.12417682	-0.482422518	N
0.783333333	2.324173012	0.007007709	0.026645666	0.010913582	0.011744307	0.056	0.631	0.426	0.367904348	0.00021624	0.731058579	0.952574127	0.880797078	0.107177164	-0.169826142	N
0.758842444	6.13209402	0.004604102	0.008232833	0.006179561	0.006065153	0.319	0.729	0.649	0.612043478	0.001910254	0.731058579	0.880797078	0.880797078	0.145445899	-0.46115344	N
0.703910615	1.780409913	0.008177446	0.01701786	0.012390702	0.01242568	0.095	0.464	0.289	0.281695652	0.008635579	0.952574127	0.98201379	0.952574127	0.044313776	-0.562285562	N
0.701298701	4.332388377	0.013026482	0.030462894	0.017588321	0.018414816	0.048	0.825	0.657	0.612347826	0	0.952574127	0.98201379	0.952574127	0.048418745	-0.558180593	N
0.775641026	1.099174507	0.00678182	0.01620582	0.009979223	0.010335021	0.082	0.624	0.4855	0.464847826	0.001831688	0.731058579	0.952574127	0.880797078	0.138006924	-0.252426236	N
0.715555556	1.706318136	0.007890774	0.019019279	0.012400447	0.012735625	0.128	0.615	0.475	0.457101449	0.00021293	0.731058579	0.952574127	0.880797078	0.129869384	-0.204841265	N
0.826589595	3.048148853	0.006700379	0.128575881	0.013058632	0.023777421	0.06	1	0.5965	0.667891304	0.001387501	0.731058579	0.952574127	0.880797078	0.14288759	-0.093929426	N
0.800970874	2.07196085	0.00543961	0.010845042	0.007102912	0.007424704	0.063	0.705	0.547	0.520391304	0	0.880797078	0.952574127	0.880797078	0.131615796	-0.474983543	N
0.78125	3.16916626	0.007890774	0.019019279	0.012400447	0.012735625	0.128	0.615	0.475	0.457101449	0.00021293	0.731058579	0.952574127	0.880797078	0.129869384	-0.204841265	N
0.677272727	1.091261618	0.007906973	0.03043425	0.017095684	0.017495871	0.07	0.676	0.501	0.483666667	0	0.880797078	0.98201379	0.952574127	0.048226005	-0.400343194	N
0.758426966	2.466392799	0.00441631	0.082478167	0.008609326	0.010336589	0.042	0.85	0.4065	0.394391304	0.000415084	0.731058579	0.952574127	0.880797078	0.107118177	-0.101116624	N
0.590361446	1.635504857	0.006599413	0.014349574	0.009603477	0.010097188	0.029	0.559	0.084	0.249	0	0.880797078	0.98201379	0.970687769	0.035911097	-0.354522062	N
0.780748663	3.867105034	0.008008494	0.082478167	0.012778293	0.014293651	0.059	0.85	0.2575	0.303423913	0	0.731058579	0.98201379	0.880797078	0.108122529	-0.191244523	N
0.70212766	3.041913916	0.007030082	0.014414305	0.010081035	0.010288196	0.118	0.652	0.4855	0.485108696	0.000864304	0.880797078	0.98201379	0.952574127	0.066823443	-0.323609717	N
0.671717172	3.680387635	0.005260601	0.0108039	0.007323714	0.007236916	0.128	0.451	0.277	0.281521739	0	0.880797078	0.952574127	0.952574127	0.057226044	-0.549373295	N
0.767123288	3.681844787	0.006355273	0.02091672	0.010732277	0.010980002	0.089	0.568	0.254	0.276387681	0.000107881	0.731058579	0.98201379	0.952574127	0.084910019	-0.092077796	N
0.706161137	5.608596907	0.004671436	0.009209936	0.006739502	0.006659825	0.262	0.674	0.585	0.56526087	0	0.880797078	0.952574127	0.880797078	0.116737845	-0.489861493	N
0.659793814	2.910565055	0.007916251	0.016733607	0.012009164	0.011750047	0.085	1	0.6035	0.709065217	6.65402E-05	0.731058579	0.952574127	0.880797078	0.123652897	-0.266780262	N
0.823834197	2.87793356	0.007311959	0.016488633	0.01074672	0.011014105	0.062	0.608	0.427	0.411913043	0.000247127	0.880797078	0.952574127	0.880797078	0.106819212	-0.202053197	N
0.770731707	1.783935155	0.008564304	0.154537318	0.03590451	0.037553557	0.057	0.831	0.675	0.630711957	0.00106446	0.731058579	0.952574127	0.880797078	0.155163572	-0.092272586	N
0.841176471	2.027888416	0.008220849	0.018145129	0.011337016	0.011556666	0.093	0.605	0.4	0.390426087	0.000397067	0.880797078	0.98201379	0.952574127	0.067760081	-0.192973371	N
0.697095436	2.191752325	0.00543961	0.011258668	0.007097312	0.007398645	0.063	0.705	0.531	0.501586957	0	0.880797078	0.952574127	0.880797078	0.127896308	-0.320672891	N
0.713656388	8.779007693	0.007754811	0.015261095	0.010777318	0.010330644	0.203	0.746	0.554	0.536173913	0	0.731058579	0.880797078	0.880797078	0.145445899	-0.46115344	N
0.826923077	3.725290996	0.009079365	0.081126632	0.011778571	0.014968425	0.099	0.764	0.385	0.408434783	0.000864678	0.731058579	0.880797078	0.880797078	0.16566713	-0.440932208	N
0.790243902	2.622338066	0.008177446	0.01701786	0.012390702	0.01242568	0.095	0.464	0.289	0.281695652	0.008635579	0.952574127	0.98201379	0.952574127	0.044313776	-0.562285562	N
0.833935018	2.922201662	0.005273166	0.014829948	0.008704618	0.009054971	0.05	0.59	0.4705	0.4455	0.000864304	0.731058579	0.952574127	0.880797078	0.129232128	-0.261201031	N
0.83908046	2.163853556	0.00563985	0.025095174	0.013722865	0.013827785	0.063	0.645	0.4715	0.454384058	0.001217465	0.731058579	0.98201379	0.880797078	0.11043838	-0.115124865	N
0.797900262	3.424719403	0.009920757	0.016995967	0.013591228	0.013384285	0.086	0.384	0.203	0.209608696	0	0.731058579	0.952574127	0.880797078	0.130567948	-0.47603139	N
0.715976331	1.298772364	0.007890774	0.019019279	0.012400447	0.012735625	0.128	0.615	0.475	0.457101449	0.00021293	0.731058579	0.952574127	0.880797078	0.129869384	-0.204841265	N
0.780701754	2.172359018	0.006162824	0.369731604	0.012441907	0.019544829	0.052	0.85	0.499	0.503143478	0.001762129	0.731058579	0.952574127	0.880797078	0.157960991	-0.072395388	N
0.767772512	1.668650696	0.007007709	0.019953467	0.011517946	0.011685842	0.062	0.641	0.461	0.427235507	0.000245359	0.731058579	0.98201379	0.952574127	0.090298737	-0.092814636	N
0.66509434	2.556386473	0.00543961	0.010845042	0.007102912	0.007424704	0.063	0.705	0.547	0.520391304	0	0.880797078	0.952574127	0.880797078	0.131615796	-0.474983543	N
0.863157895	2.667220639	0.006096524	0.023840057	0.011835869	0.012272885	0.056	0.608	0.449	0.423713043	7.68905E-05	0.731058579	0.98201379	0.880797078	0.101910989	-0.14171282	N
0.736585366	3.505141597	0.005849904	0.092354724	0.010061227	0.011575205	0.06	0.815	0.4275	0.399695652	0.001383987	0.731058579	0.952574127	0.880797078	0.137221038	-0.143622751	N
0.743055556	3.720268377	0.006162824	0.092354724	0.009871726	0.012437454	0.06	0.825	0.488	0.476869565	0.002248746	0.731058579	0.952574127	0.880797078	0.184648532	-0.185405714	N
0.666666667	3.727617143	0.006162824	0.092354724	0.009871726	0.012437454	0.06	0.825	0.488	0.476869565	0.002248746	0.731058579	0.952574127	0.880797078	0.184648532	-0.185405714	N
0.703196347	2.427274486	0.007890774	0.019019279	0.012345115	0.01255044	0.128	0.615	0.468	0.452086957	0.000137036	0.731058579	0.952574127	0.880797078	0.11197051	-0.145576045	N
0.721052632	5.472774046	0.006809438	0.023840057	0.012267358	0.012996965	0.06	0.692	0.501	0.489057971	0.00133079	0.731058579	0.952574127	0.880797078	0.145637881	-0.172739885	N
0.725	3.755284302	0.006162824	0.092354724	0.010875724	0.012961937	0.06	0.821	0.507	0.492391304	0.002498559	0.731058579	0.952574127	0.880797078	0.175079181	-0.169136825	N
0.800904977	4.905118257	0.008156893	0.024546672	0.012651807	0.014082659	0.152	0.552	0.501	0.437333333	0.002098636	0.880797078	0.952574127	0.880797078	0.121077247	-0.518645787	N
0.732142857	7.068125901	0.004721881	0.017716351	0.011219116	0.011219116	0.262	0.527	0.3945	0.3945	0	0.880797078	0.952574127	0.92414182	0.092561176	-0.691272645	N
0.812227074	4.575577161	0.008156893	0.024546672	0.012651807	0.014082659	0.152	0.552	0.501	0.437333333	0.002098636	0.880797078	0.952574127	0.880797078	0.121077247	-0.518645787	N
0.783783784	5.290628136	0.008477978	0.027037659	0.014682643	0.016220231	0.413	0.557	0.4705	0.47775	0	0.880797078	0.952574127	0.92414182	0.092561176	-0.572496029	N
0.810810811	3.046967458	0.048781823	0.048781823	0.048781823	0.048781823	0.738	0.738	0.738	0.738	0.03030303	0.952574127	0.952574127	0.952574127	0.049787068	-0.950212932	N
0.770750988	4.475873531	0.008706775	0.020788672	0.01439699	0.013730163	0.343	0.455	0.416	0.4032	0.004037685	0.880797078	0.98201379	0.952574127	0.060602425	-0.565801616	N
0.834645669	3.057651917	0.013335057	0.015425806	0.014380431	0.014380431	0.424	0.443	0.4335	0.4335	0	0.880797078	0.880797078	0.880797078	0.135335283	-0.706634577	N
0.8125	3.721004309	0.009340501	0.015330646	0.012335574	0.012335574	0.521	0.577	0.549	0.549	0	0.880797078	0.952574127	0.92414182	0.092561176	-0.691272645	N
0.821561338	1.052301021	0.010951617	0.01386028	0.012024247	0.012238034	0.429	0.625	0.5195	0.51525	0.001974334	0.880797078	0.880797078	0.880797078	0.135335283	-0.51180842	N
0.726235741	4.037332424	0.031275778	0.031275778	0.031275778	0.031275778	0.576	0.576	0.576	0.576	0.069767442	0.952574127	0.952574127	0.952574127	0.049787068	-0.950212932	N
0.787755102	2.748206513	0.011594918	0.015284781	0.01343985	0.01343985	0.134	0.392	0.263	0.263	0	0.880797078	0.952574127	0.92414182	0.092561176	-0.691272645	N
0.871559633	2.793992509	0.012209854	0.01422726	0.013218557	0.013218557	0.147	0.455	0.301	0.301	0	0.952574127	0.952574127	0.952574127	0.049787068	-0.792182792	N
0.763485477	5.326453171	0.015565708	0.015565708	0.015565708	0.015565708	0.456	0.456	0.456	0.456	0	0.952574127	0.952574127	0.952574127	0.049787068	-0.950212932	N
0.842307692	6.900052546	0.011297615	0.011297615	0.011297615	0.011297615	0.46	0.46	0.46	0.46	0	0.952574127	0.952574127	0.952574127	0.049787068	-0.950212932	N
0.985294118	3.971763431	0.009340501	0.010055884	0.009698193	0.009698193	0.521	0.535	0.528	0.528	0	0.952574127	0.952574127	0.952574127	0.049787068	-0.792182792	N
0.869198312	1.867431588	0.008599864	0.008599864	0.008599864	0.008599864	0.566	0.566	0.566	0.566	0.006339144	0.731058579	0.731058579	0.731058579	0.367879441	-0.632120559	N
0.808943089	2.095494828	0.057964225	0.057964225	0.057964225	0.057964225	0.524	0.524	0.524	0.524	0.046511628	0.880797078	0.880797078	0.880797078	0.135335283	-0.864664717	N
0.850622407	1.75581687	0.008599864	0.015000459	0.011800161	0.011800161	0.376	0.566	0.471	0.471	0.006339144	0.731058579	0.880797078	0.817574476	0.251607362	-0.532226459	N
0.666666667	5.921436916	0.008806102	0.051272814	0.011394579	0.018801393	0.047	1	0.45	0.4022	0.009140768	0.880797078	0.952574127	0.952574127	0.066896711	-0.561965239	N
0.790598291	2.452049403	0.011892012	0.014470856	0.013181434	0.013181434	0.47	0.486	0.478	0.478	0	0.880797078	0.952574127	0.92414182	0.092561176	-0.691272645	N
0.732	5.084714616	0.009441048	0.016610662	0.013311123	0.013346899	0.347	0.489	0.376	0.4088	0.014981273	0.880797078	0.952574127	0.880797078	0.11822564	-0.532486544	N
0.839694656	1.934516699	0.011725937	0.018383992	0.01297615	0.013911627	0.167	0.482	0.44	0.3922	0.003558719	0.880797078	0.952574127	0.880797078	0.101115997	-0.535908473	N
0.707581227	4.520883814	0.01807823	0.01807823	0.01807823	0.01807823	0.158	0.158	0.158	0.158	0	0.952574127	0.952574127	0.952574127	0.049787068	-0.950212932	N
0.824390244	3.636088976	0.015000459	0.015000459	0.015000459	0.015000459	0.376	0.376	0.376	0.376	0	0.880797078	0.880797078	0.880797078	0.135335283	-0.864664717	N
0.796680498	5.848131555	0.015000459	0.015000459	0.015000459	0.015000459	0.376	0.376	0.376	0.376	0	0.880797078	0.880797078	0.880797078	0.135335283	-0.864664717	N
0.816326531	3.080557115	0.008244279	0.208155542	0.054618519	0.055641061	0.048	1	0.6685	0.5748125	0.005423974	0.880797078	0.98201379	0.952574127	0.079900685	-0.486958767	N
0.831896552	3.08688312	0.009535217	0.009535217	0.009535217	0.009535217	0.056	0.056	0.056	0.056	0	0.952574127	0.952574127	0.952574127	0.049787068	-0.950212932	N
0.866666667	2.475725186	0.009098228	0.009098228	0.009098228	0.009098228	0.341	0.341	0.341	0.341	0.042253521	0.880797078	0.880797078	0.880797078	0.135335283	-0.864664717	N
0.718550107	4.29085571	0.010625721	0.010625721	0.010625721	0.010625721	0.478	0.478	0.478	0.478	0.007905138	0.880797078	0.880797078	0.880797078	0.135335283	-0.864664717	N
0.769811321	6.96077052	0.007868932	0.007868932	0.007868932	0.007868932	0.414	0.414	0.414	0.414	0.002971768	0.880797078	0.880797078	0.880797078	0.135335283	-0.864664717	N
0.797413793	2.695827999	0.014153307	0.077563489	0.068966673	0.055599221	0.366	0.836	0.672	0.607181818	0.006896552	0.880797078	0.952574127	0.880797078	0.096449731	-0.48550305	N
0.783269962	4.690307391	0.013182261	0.020487803	0.016133438	0.016484235	0.158	0.352	0.3175	0.28625	0	0.952574127	0.98201379	0.970687769	0.034051354	-0.631005851	N
0.658730159	2.500998999	0.011658157	0.015044064	0.014470856	0.013888792	0.077	0.486	0.394	0.368285714	0	0.880797078	0.952574127	0.880797078	0.110892936	-0.559502781	N
0.770318021	1.99078375	0.008414899	0.008599864	0.008507381	0.008507381	0.566	0.697	0.6315	0.6315	0.003431709	0.731058579	0.880797078	0.817574476	0.251607362	-0.590362498	N
0.828996283	4.6418246	0.016131272	0.092224369	0.072618874	0.060233862	0.117	0.836	0.716	0.61675	0.007690617	0.880797078	0.952574127	0.952574127	0.088672621	-0.506896102	N
0.710884354	4.877829891	0.01198187	0.01198187	0.01198187	0.01198187	0.473	0.473	0.473	0.473	0	0.880797078	0.880797078	0.880797078	0.135335283	-0.864664717	N
0.702508961	4.122194771	0.182973955	0.208155542	0.18783756	0.192989019	0.662	0.713	0.713	0.696	0.021857923	0.880797078	0.880797078	0.880797078	0.135335283	-0.628119624	N
0.886554622	3.3528979	0.012209854	0.01422726	0.013218557	0.013218557	0.147	0.455	0.301	0.301	0	0.952574127	0.952574127	0.952574127	0.049787068	-0.792182792	N
0.797619048	5.13718486	0.012371205	0.012371205	0.012371205	0.012371205	0.358	0.358	0.358	0.358	0.066666667	0.880797078	0.880797078	0.880797078	0.135335283	-0.864664717	N
0.682926829	4.00564955	0.012570927	0.018529822	0.015678344	0.015402084	0.07	0.447	0.082	0.1526	0	0.880797078	0.952574127	0.92414182	0.092561176	-0.669885591	N
0.743670886	4.248964471	0.182973955	0.208155542	0.18783756	0.192989019	0.662	0.713	0.713	0.696	0.021857923	0.880797078	0.880797078	0.880797078	0.135335283	-0.628119624	N
0.735883424	4.385601932	0.009435586	0.092224369	0.018908821	0.037025335	0.366	0.836	0.45	0.53225	0.003578074	0.880797078	0.952574127	0.880797078	0.099690194	-0.488005658	N
0.874538745	5.728692267	0.009098228	0.244076145	0.015690781	0.059500904	0.341	0.796	0.365	0.4446	0.009104704	0.880797078	0.952574127	0.952574127	0.084006354	-0.546174259	N
0.793478261	4.140604682	0.022151393	0.18783756	0.182973955	0.130987636	0.516	0.713	0.662	0.630333333	0.021276596	0.880797078	0.952574127	0.880797078	0.106819212	-0.630797456	N
0.850299401	4.172548319	0.009334704	0.029282015	0.014818696	0.017475018	0.147	0.729	0.473	0.4837	0.00166021	0.880797078	0.98201379	0.92414182	0.08626689	-0.504613281	N
0.822429907	3.952207088	0.010877478	0.208155542	0.016545883	0.090642278	0.097	0.715	0.662	0.542428571	0.007338225	0.880797078	0.952574127	0.880797078	0.110892936	-0.517552778	N
0.780590717	5.260262634	0.012371205	0.016610662	0.014490933	0.014490933	0.358	0.489	0.4235	0.4235	0.066666667	0.880797078	0.880797078	0.880797078	0.135335283	-0.648498538	N
0.404761905	4.082727457	0.008599864	0.021256718	0.009590692	0.01256995	0	0	0	0	0.007587253	0.731058579	0.952574127	0.952574127	0.102802464	-0.511408765	N
0.74904943	1.91733769	0.010292782	0.012009859	0.011151321	0.011151321	0.037	0.507	0.272	0.272	0	0.880797078	0.880797078	0.880797078	0.135335283	-0.648498538	N
0.716101695	5.871857418	0.013200407	0.017020994	0.016858672	0.015693358	0.371	0.475	0.463	0.436333333	0.004444444	0.952574127	0.952574127	0.952574127	0.049787068	-0.642980645	N
0.766283525	4.727319657	0.016067985	0.120896789	0.068950119	0.068716253	0	0	0	0	0	0.952574127	0.952574127	0.952574127	0.049787068	-0.734046752	N
0.83269962	4.030877955	0.014695054	0.019219739	0.014968811	0.016294535	0.128	0.447	0.207	0.260666667	0	0.952574127	0.952574127	0.952574127	0.049787068	-0.661991359	N
0.710526316	6.686210128	0.009503739	0.018529822	0.015723025	0.014585528	0.07	0.429	0.082	0.193666667	0	0.952574127	0.952574127	0.952574127	0.049787068	-0.950212932	N
0.803030303	2.448001417	0.009334704	0.01706118	0.010646095	0.011493776	0.088	0.452	0.3355	0.296	0	0.880797078	0.98201379	0.952574127	0.067240193	-0.542530585	N
0.65	3.250607282	0.009503739	0.072585997	0.020261362	0.036165228	0.039	0.836	0.467	0.539142857	0.018411968	0.880797078	0.952574127	0.952574127	0.064045104	-0.576715354	N
0.714705882	5.267781561	0.008496083	0.011308541	0.010877546	0.01022739	0.4	0.436	0.416	0.417333333	0	0.952574127	0.952574127	0.952574127	0.049787068	-0.739506079	N
0.713768116	3.037580266	0.011973117	0.099775558	0.016638225	0.042795633	0.055	0.504	0.388	0.315666667	0.01010101	0.952574127	0.952574127	0.952574127	0.049787068	-0.712659699	N
0.745033113	3.088524405	0.009340501	0.009340501	0.009340501	0.009340501	0.521	0.521	0.521	0.521	0	0.952574127	0.952574127	0.952574127	0.049787068	-0.950212932	N
0.871428571	2.049779627	0.011725937	0.012009859	0.011867898	0.011867898	0.037	0.466	0.2515	0.2515	0.014084507	0.880797078	0.880797078	0.880797078	0.135335283	-0.648498538	N
0.779220779	4.417513738	0.060151294	0.072585997	0.061578787	0.064772026	0.781	0.836	0.836	0.817666667	0.019455253	0.880797078	0.952574127	0.952574127	0.07830314	-0.685151767	N
0.773195876	2.657979508	0.009503739	0.077563489	0.019000246	0.025833572	0.301	0.662	0.494	0.477428571	0.012285012	0.880797078	0.993307149	0.952574127	0.04686653	-0.56003044	N
0.628691983	1.507543546	0.010481205	0.013672835	0.011363124	0.011839055	0.35	0.515	0.364	0.409666667	0.011764706	0.952574127	0.952574127	0.952574127	0.049787068	-0.629978462	N
0.731012658	4.327554268	0.01198187	0.143863739	0.015275646	0.035563536	0.376	0.562	0.49	0.488833333	0.002971768	0.880797078	0.952574127	0.880797078	0.11822564	-0.538366382	N
0.6875	6.738616241	0.009503739	0.091781419	0.050642579	0.050642579	0.429	0.604	0.5165	0.5165	0.066666667	0.880797078	0.952574127	0.92414182	0.092561176	-0.669885591	N
0.86381323	4.467404162	0.020782704	0.092224369	0.072618874	0.066494282	0.52	0.836	0.7475	0.726875	0.008385177	0.880797078	0.952574127	0.880797078	0.103254703	-0.517324773	N
0.816901408	3.326608229	0.007476401	0.022505028	0.011619461	0.012911857	0.047	0.547	0.393	0.341615385	0.004032619	0.880797078	0.952574127	0.952574127	0.069528964	-0.506334715	N
0.793248945	2.473549781	0.010277116	0.031620615	0.030909187	0.024268973	0.397	0.47	0.47	0.445666667	0.006451613	0.731058579	0.952574127	0.880797078	0.184333931	-0.508433782	N
0.765957447	2.154639325	0.020788672	0.020788672	0.020788672	0.020788672	0.386	0.386	0.386	0.386	0.011764706	0.952574127	0.952574127	0.952574127	0.049787068	-0.950212932	N
0.673306773	4.844031164	0.01149266	0.018888048	0.01807823	0.016152979	0.075	0.437	0.158	0.223333333	0	0.952574127	0.952574127	0.952574127	0.049787068	-0.661991359	N
0.915555556	4.19091362	0.182973955	0.208155542	0.18783756	0.192989019	0.662	0.713	0.713	0.696	0.021857923	0.880797078	0.880797078	0.880797078	0.135335283	-0.628119624	N
0.792	11.21099732	0.01439699	0.017795277	0.016096134	0.016096134	0.242	0.455	0.3485	0.3485	0.015748031	0.880797078	0.880797078	0.880797078	0.135335283	-0.864664717	N
0.768115942	5.412837323	0.012709326	0.012709326	0.012709326	0.012709326	0.389	0.389	0.389	0.389	0	0.880797078	0.880797078	0.880797078	0.135335283	-0.864664717	N
0.784232365	4.153281887	0.182973955	0.208155542	0.18783756	0.192989019	0.662	0.713	0.713	0.696	0.021857923	0.880797078	0.880797078	0.880797078	0.135335283	-0.628119624	N
0.782101167	2.939404648	0.157607398	0.157607398	0.157607398	0.157607398	0.49	0.49	0.49	0.49	0	0.952574127	0.952574127	0.952574127	0.049787068	-0.950212932	N
0.760956175	3.91889832	0.013011868	0.018323838	0.014904882	0.015286368	0.073	0.388	0.235	0.23275	0	0.952574127	0.98201379	0.952574127	0.039296592	-0.636972113	N
0.760989011	1.866991203	0.011767085	0.014631908	0.011819994	0.012739662	0.428	0.476	0.431	0.445	0	0.880797078	0.952574127	0.880797078	0.106819212	-0.656635696	N
0.811403509	2.616995913	0.075397623	0.092224369	0.081710441	0.083110811	0.652	0.758	0.687	0.699	0.015367728	0.880797078	0.880797078	0.880797078	0.135335283	-0.592776027	N
0.793220339	2.90999501	0.009527254	0.208155542	0.185405758	0.147123578	0.336	0.713	0.6875	0.606	0.016736402	0.880797078	0.952574127	0.880797078	0.11394823	-0.590870521	N
0.72519084	5.581199345	0.009527254	0.009527254	0.009527254	0.009527254	0.336	0.336	0.336	0.336	0	0.952574127	0.952574127	0.952574127	0.049787068	-0.950212932	N
0.731034483	4.947319241	0.012371205	0.012371205	0.012371205	0.012371205	0.358	0.358	0.358	0.358	0.066666667	0.880797078	0.880797078	0.880797078	0.135335283	-0.864664717	N
0.894957983	1.998691255	0.012009859	0.022492027	0.017250943	0.017250943	0.037	0.207	0.122	0.122	0	0.880797078	0.952574127	0.92414182	0.092561176	-0.669885591	N
0.790780142	3.944472417	0.009098228	0.014005787	0.011552007	0.011552007	0.341	0.474	0.4075	0.4075	0.032258065	0.880797078	0.880797078	0.880797078	0.135335283	-0.648498538	N
0.788793103	1.133812061	1	1	1	1	1	1	1	1	0.07106599	0.5	0.5	0.5	1	0	N
0.764925373	4.506725475	0.014153307	0.085001445	0.04002436	0.044463547	0.366	0.836	0.4645	0.5595	0.012865497	0.880797078	0.952574127	0.952574127	0.084006354	-0.557639097	N
0.78597786	3.013558147	0.014796084	0.078543062	0.071115681	0.064129788	0.386	0.836	0.672	0.669789474	0.003753971	0.880797078	0.952574127	0.880797078	0.10381752	-0.459507268	N
0.84375	3.087228204	0.012733945	0.191808333	0.102271139	0.102271139	0.411	0.765	0.588	0.588	0.02020202	0.952574127	0.993307149	0.98201379	0.028262508	-0.726316402	N
0.664	2.074726724	0.016320374	1	0.508160187	0.508160187	0.423	1	0.7115	0.7115	0.016309888	0.5	0.880797078	0.731058579	0.567667642	-0.216166179	N
0.838187702	1.309673176	0.010520838	0.012808852	0.011524451	0.011545389	0.475	0.625	0.5325	0.5406	0.001381079	0.731058579	0.952574127	0.880797078	0.150034878	-0.470167766	N
0.808823529	3.680345682	0.014934466	0.02679044	0.014968811	0.018897906	0.207	0.547	0.448	0.400666667	0	0.952574127	0.952574127	0.952574127	0.049787068	-0.687829599	N
0.715909091	4.924391876	0.014462584	0.014462584	0.014462584	0.014462584	0.194	0.194	0.194	0.194	0	0.880797078	0.880797078	0.880797078	0.135335283	-0.864664717	N
0.765432099	2.7311344	0.011973117	0.01614829	0.014060703	0.014060703	0.055	0.399	0.227	0.227	0	0.952574127	0.952574127	0.952574127	0.049787068	-0.704791841	N
0.800738007	3.000565826	0.019897427	0.020968127	0.019924252	0.020263269	0.142	0.546	0.401	0.363	0	0.952574127	0.952574127	0.952574127	0.049787068	-0.734046752	N
0.822064057	4.094862378	0.009275825	0.143863739	0.015138052	0.028938912	0.076	0.562	0.473	0.43	0.002378121	0.880797078	0.952574127	0.880797078	0.110892936	-0.532282022	N
0.737201365	5.067735745	0.012371205	0.020429743	0.017127135	0.016763804	0	0	0	0	0.028368794	0.880797078	0.952574127	0.880797078	0.106819212	-0.595453859	N
0.724014337	4.118710351	0.01198187	0.01198187	0.01198187	0.01198187	0.473	0.473	0.473	0.473	0	0.880797078	0.880797078	0.880797078	0.135335283	-0.864664717	N
0.845188285	3.950593411	0.011973117	0.016638225	0.014647758	0.014476714	0.055	0.429	0.3935	0.31775	0	0.952574127	0.952574127	0.952574127	0.049787068	-0.597262881	N
0.771428571	4.826912288	0.075397623	0.092224369	0.083810996	0.083810996	0.652	0.758	0.705	0.705	0.020964361	0.880797078	0.880797078	0.880797078	0.135335283	-0.648498538	N
0.723320158	5.182698322	0.012709326	0.012709326	0.012709326	0.012709326	0.389	0.389	0.389	0.389	0	0.880797078	0.880797078	0.880797078	0.135335283	-0.864664717	N
0.832599119	1.934684922	0.015000459	0.119803861	0.015762113	0.050188811	0.376	0.825	0.429	0.543333333	0	0.880797078	0.952574127	0.92414182	0.092561176	-0.691272645	N
0.83935743	4.536022248	0.060326851	0.074146983	0.060999645	0.065753402	0.59	0.732	0.665	0.6756	0.006092254	0.880797078	0.952574127	0.952574127	0.084006354	-0.559861973	N
0.696035242	3.558386362	0.00848269	0.016612509	0.011672699	0.011744415	0.043	0.466	0.4075	0.3699	0.003353576	0.880797078	0.952574127	0.952574127	0.075451533	-0.510084643	N
0.851351351	2.452198755	0.012193333	0.019615463	0.014470856	0.015152086	0.104	0.486	0.389	0.3058	0	0.880797078	0.952574127	0.880797078	0.11822564	-0.545210239	N
0.701694915	2.811612242	0.009568463	0.011260235	0.010414349	0.010414349	0.386	1	0.693	0.693	0.012722646	0.880797078	0.952574127	0.92414182	0.092561176	-0.691272645	N
0.814814815	6.089255124	0.010434077	0.020788672	0.016566603	0.015926039	0.061	1	0.445	0.4894	0.006896552	0.952574127	0.952574127	0.952574127	0.049787068	-0.609923373	N
0.795454545	5.438632695	0.009952636	0.009952636	0.009952636	0.009952636	0.523	0.523	0.523	0.523	0.031496063	0.952574127	0.952574127	0.952574127	0.049787068	-0.950212932	N
0.892	3.376442175	0.076581729	0.076581729	0.076581729	0.076581729	0.695	0.695	0.695	0.695	0.068965517	0.880797078	0.880797078	0.880797078	0.135335283	-0.864664717	N
0.820224719	4.17852689	0.009550377	0.208155542	0.072774201	0.078010982	0.39	1	0.662	0.617571429	0.006051437	0.880797078	0.98201379	0.880797078	0.108644977	-0.468962571	N
0.857142857	2.911183632	0.011725937	0.014713431	0.013219684	0.013219684	0.466	0.507	0.4865	0.4865	0.00591716	0.880797078	0.880797078	0.880797078	0.135335283	-0.648498538	N
0.821011673	3.903918124	0.009263784	0.015806844	0.014588166	0.013815102	0.44	0.527	0.506	0.488	0	0.880797078	0.952574127	0.880797078	0.11822564	-0.563813772	N
0.595833333	4.582489293	0.01807823	0.01807823	0.01807823	0.01807823	0.158	0.158	0.158	0.158	0	0.952574127	0.952574127	0.952574127	0.049787068	-0.950212932	N
0.850220264	5.386983867	0.009894998	0.011334935	0.010614967	0.010614967	0.53	0.567	0.5485	0.5485	0	0.880797078	0.880797078	0.880797078	0.135335283	-0.706634577	N
0.8359375	2.026782029	0.011594918	0.015284781	0.01343985	0.01343985	0.134	0.392	0.263	0.263	0	0.880797078	0.952574127	0.92414182	0.092561176	-0.691272645	N
0.731182796	3.005360663	0.009535217	0.204940411	0.072585997	0.071390442	0.056	0.836	0.646	0.571076923	0.005304035	0.880797078	0.98201379	0.880797078	0.093430613	-0.478636187	N
0.791505792	5.128691145	0.021464234	0.054889837	0.029206878	0.033691957	0.576	0.613	0.576	0.58525	0.011412268	0.880797078	0.952574127	0.952574127	0.071174122	-0.597723565	N
0.767123288	2.722034195	0.021012596	0.074146983	0.072932219	0.056030599	0.468	0.732	0.665	0.621666667	0.007513148	0.880797078	0.952574127	0.880797078	0.106819212	-0.630797456	N
0.665517241	4.718268212	0.009597343	0.009597343	0.009597343	0.009597343	0.433	0.433	0.433	0.433	0	0.880797078	0.880797078	0.880797078	0.135335283	-0.864664717	N
0.716262976	4.320106583	0.010277116	0.063055424	0.013060419	0.022054593	0.094	1	0.455	0.526785714	0.006908463	0.880797078	0.952574127	0.952574127	0.068118829	-0.513552659	N
0.779527559	5.292606043	0.009098228	0.01443086	0.011764544	0.011764544	0.341	0.547	0.444	0.444	0.035294118	0.880797078	0.952574127	0.92414182	0.092561176	-0.669885591	N
0.676579926	3.963846864	0.014131421	0.02079456	0.016373653	0.017060363	0.082	0.612	0.388	0.382	0	0.952574127	0.952574127	0.952574127	0.049787068	-0.633475288	N
0.782407407	2.411822361	0.009988197	0.01807823	0.015598879	0.014816046	0.101	0.322	0.21	0.21075	0	0.880797078	0.952574127	0.952574127	0.071174122	-0.619110619	N
0.710084034	4.33467015	0.028592598	0.208155542	0.185405758	0.151889914	0.585	0.713	0.6875	0.66825	0.015810277	0.880797078	0.952574127	0.880797078	0.11394823	-0.580176995	N
0.541322314	5.51474564	0.01297615	0.01297615	0.01297615	0.01297615	0.482	0.482	0.482	0.482	0	0.952574127	0.952574127	0.952574127	0.049787068	-0.950212932	N
0.863453815	4.038723015	0.012209854	0.019743706	0.015294017	0.015635398	0.455	1	0.5385	0.633	0	0.880797078	0.952574127	0.92414182	0.092561176	-0.572496029	N
0.827433628	3.560268759	0.007476401	0.011918842	0.009056441	0.009491975	0.047	0.413	0.369	0.290285714	0.004419102	0.880797078	0.952574127	0.952574127	0.062008242	-0.537560232	N
0.724279835	1.956539287	0.014470856	1	0.507235428	0.507235428	0.486	1	0.743	0.743	0.045307443	0.5	0.880797078	0.731058579	0.567667642	-0.216166179	N
0.908296943	2.546196088	0.020214215	0.020214215	0.020214215	0.020214215	0.467	0.467	0.467	0.467	0.01010101	0.952574127	0.952574127	0.952574127	0.049787068	-0.950212932	N
0.793814433	3.055290213	0.018383992	0.074631699	0.057964225	0.050326639	0.167	0.524	0.524	0.405	0.035294118	0.880797078	0.952574127	0.880797078	0.106819212	-0.585948502	N
0.809128631	3.876501924	0.017716351	0.017716351	0.017716351	0.017716351	0.262	0.262	0.262	0.262	0	0.952574127	0.952574127	0.952574127	0.049787068	-0.950212932	N
0.670498084	2.143686313	0.182973955	0.18783756	0.185405758	0.185405758	0.662	0.713	0.6875	0.6875	0.026548673	0.880797078	0.880797078	0.880797078	0.135335283	-0.706634577	N
0.756410256	4.642553964	0.013799521	0.015713427	0.014756474	0.014756474	0.393	0.479	0.436	0.436	0	0.880797078	0.98201379	0.952574127	0.076825461	-0.70700836	N
0.730496454	2.848245386	0.009485034	0.012014977	0.010750005	0.010750005	0.406	0.677	0.5415	0.5415	0	0.952574127	0.952574127	0.952574127	0.049787068	-0.734046752	N
0.711297071	1.837627879	0.010721338	0.01386028	0.012068974	0.012080006	0.41	0.625	0.5425	0.542833333	0.002675448	0.880797078	0.952574127	0.880797078	0.121077247	-0.538024467	N
0.756302521	3.276672726	0.014754743	0.014754743	0.014754743	0.014754743	0.393	0.393	0.393	0.393	0	0.952574127	0.952574127	0.952574127	0.049787068	-0.950212932	N
0.849420849	6.148611464	0.008244279	0.020788672	0.013147226	0.01345533	0.048	0.467	0.388	0.324666667	0.00902379	0.880797078	0.952574127	0.952574127	0.059292426	-0.524229627	N
0.805785124	4.69263215	0.011658157	0.021226926	0.015128938	0.0160828	0.138	0.543	0.376	0.346111111	0	0.880797078	0.952574127	0.952574127	0.084006354	-0.505429351	N
0.404761905	2.503498894	0.060151294	0.072585997	0.061578787	0.064772026	0.781	0.836	0.836	0.817666667	0.019455253	0.880797078	0.952574127	0.952574127	0.07830314	-0.685151767	N
0.851239669	1.008766912	1	1	1	1	1	1	1	1	0.07106599	0.5	0.5	0.5	1	0	N
0.790441176	4.206133762	0.075397623	0.092224369	0.083810996	0.083810996	0.652	0.758	0.705	0.705	0.020964361	0.880797078	0.880797078	0.880797078	0.135335283	-0.648498538	N
0.670454545	6.466503822	0.022249031	0.022249031	0.022249031	0.022249031	0.497	0.497	0.497	0.497	0	0.952574127	0.952574127	0.952574127	0.049787068	-0.950212932	N
0.792517007	2.332458656	0.01198187	0.013575443	0.012778657	0.012778657	0.473	0.488	0.4805	0.4805	0	0.880797078	0.952574127	0.92414182	0.092561176	-0.691272645	N
0.817164179	4.441640775	0.017497249	0.076581729	0.047039489	0.047039489	0.433	0.695	0.564	0.564	0.014184397	0.880797078	0.952574127	0.92414182	0.092561176	-0.662017734	N
0.844357977	4.03906442	0.075397623	0.092224369	0.083810996	0.083810996	0.652	0.758	0.705	0.705	0.020964361	0.880797078	0.880797078	0.880797078	0.135335283	-0.648498538	N
0.784172662	1.804921815	1	1	1	1	1	1	1	1	0.07106599	0.5	0.5	0.5	1	0	N
0.771653543	3.224766246	0.068528721	0.092224369	0.075397623	0.078608942	0.652	0.758	0.7	0.7002	0.01130742	0.880797078	0.952574127	0.880797078	0.101115997	-0.54983122	N
0.852589641	2.544455042	0.009098228	0.009098228	0.009098228	0.009098228	0.341	0.341	0.341	0.341	0.042253521	0.880797078	0.880797078	0.880797078	0.135335283	-0.864664717	N
0.83269962	3.804727066	0.182973955	0.208155542	0.18783756	0.192989019	0.662	0.713	0.713	0.696	0.021857923	0.880797078	0.880797078	0.880797078	0.135335283	-0.628119624	N
0.799307958	2.040426271	0.009503739	0.019519801	0.014700048	0.01440078	0.164	0.484	0.287	0.303	0.020920502	0.880797078	0.952574127	0.880797078	0.101115997	-0.549596187	N
0.75502008	3.970562136	0.085001445	0.085001445	0.085001445	0.085001445	0.528	0.528	0.528	0.528	0.066666667	1	0				N
0.8	5.684843928	0.01297615	0.01297615	0.01297615	0.01297615	0.482	0.482	0.482	0.482	0	0.952574127	0.952574127	0.952574127	0.049787068	-0.950212932	N
0.808219178	9.20928283	0.047327568	0.074956695	0.070942187	0.064408817	0.59	0.76	0.738	0.696	0.026385224	0.880797078	0.880797078	0.880797078	0.135335283	-0.576443145	N
0.681967213	4.550896717	0.017218062	0.017218062	0.017218062	0.017218062	0.464	0.464	0.464	0.464	0	0.880797078	0.880797078	0.880797078	0.135335283	-0.864664717	N
0.892430279	5.69420747	0.011995504	0.011995504	0.011995504	0.011995504	0.55	0.55	0.55	0.55	0	0.880797078	0.880797078	0.880797078	0.135335283	-0.864664717	N
0.80565371	1.464751899	0.013335057	0.013335057	0.013335057	0.013335057	0.443	0.443	0.443	0.443	0	0.880797078	0.880797078	0.880797078	0.135335283	-0.864664717	N
0.733333333	5.979117431	0.008806102	0.008806102	0.008806102	0.008806102	0.047	0.047	0.047	0.047	0.01010101	0.952574127	0.952574127	0.952574127	0.049787068	-0.950212932	N
0.75862069	2.610514834	0.010520838	0.01386028	0.011381133	0.011668836	0.498	0.625	0.5325	0.54925	0.001428316	0.880797078	0.952574127	0.880797078	0.124641756	-0.51160144	N
0.833333333	1.906374121	0.008599864	0.018511032	0.011049759	0.013222935	0.5	0.571	0.566	0.5462	0.003674541	0.731058579	0.952574127	0.880797078	0.147624829	-0.525112817	N
0.538461538	3.256807816	0.009340501	0.009340501	0.009340501	0.009340501	0.521	0.521	0.521	0.521	0	0.952574127	0.952574127	0.952574127	0.049787068	-0.950212932	N
0.766037736	3.37387235	0.068966673	0.078543062	0.074321997	0.074159339	0.646	0.728	0.676	0.6774	0.005266238	0.880797078	0.880797078	0.880797078	0.135335283	-0.51879883	N
0.884462151	4.417419967	0.011297615	0.024488255	0.01956071	0.01844886	0.46	0.547	0.5035	0.5035	0	0.952574127	0.952574127	0.952574127	0.049787068	-0.734046752	N
0.874439462	5.085985407	0.009485034	0.014457078	0.012014977	0.011985696	0.406	0.677	0.44	0.507666667	0	0.880797078	0.952574127	0.952574127	0.07830314	-0.633475288	N
0.520179372	2.048781807	0.012009859	0.012009859	0.012009859	0.012009859	0.037	0.037	0.037	0.037	0	0.880797078	0.880797078	0.880797078	0.135335283	-0.864664717	N
0.844537815	2.193621246	0.014462584	0.014462584	0.014462584	0.014462584	0.194	0.194	0.194	0.194	0	0.880797078	0.880797078	0.880797078	0.135335283	-0.864664717	N
0.319444444	2.949231129	0.057964225	0.057964225	0.057964225	0.057964225	0.524	0.524	0.524	0.524	0.046511628	0.880797078	0.880797078	0.880797078	0.135335283	-0.864664717	N
0.762096774	3.341117676	0.066186964	0.077727405	0.071856139	0.071906661	0.507	0.704	0.6035	0.6045	0.004459309	0.952574127	0.98201379	0.952574127	0.041919211	-0.659426295	N
0.651452282	5.140144195	0.009597053	0.020214215	0.012973324	0.013499264	0.152	0.488	0.4125	0.3582	0.011494253	0.880797078	0.98201379	0.880797078	0.093817029	-0.507291657	N
0.760869565	2.876864787	0.010478579	0.013434998	0.011974083	0.011965436	0.407	0.478	0.467	0.45475	0	0.880797078	0.952574127	0.952574127	0.071174122	-0.691780668	N
0.797945205	2.942776059	0.007476401	0.072585997	0.009503739	0.025208661	0.26	0.836	0.429	0.510818182	0.006993007	0.880797078	0.952574127	0.952574127	0.065341289	-0.519240354	N
0.813868613	3.315420415	0.009340501	0.009340501	0.009340501	0.009340501	0.521	0.521	0.521	0.521	0	0.952574127	0.952574127	0.952574127	0.049787068	-0.950212932	N
0.8	2.845892233	0.060151294	0.084138702	0.072929875	0.072341615	0.507	0.836	0.6975	0.693785714	0.005056091	0.731058579	0.98201379	0.952574127	0.100812927	-0.471167719	N
0.67219917	2.860963025	0.012209854	0.230907876	0.01422726	0.085781664	0.147	0.696	0.455	0.432666667	0.001980198	0.952574127	0.952574127	0.952574127	0.049787068	-0.668818885	N
0.892857143	2.69405219	0.020788672	0.020788672	0.020788672	0.020788672	0.386	0.386	0.386	0.386	0.011764706	0.952574127	0.952574127	0.952574127	0.049787068	-0.950212932	N
0.849206349	4.24138322	0.075397623	0.092224369	0.081710441	0.083110811	0.652	0.758	0.687	0.699	0.015367728	0.880797078	0.880797078	0.880797078	0.135335283	-0.592776027	N
0.864253394	4.077178989	0.022151393	0.208155542	0.182973955	0.137760297	0.516	0.713	0.662	0.630333333	0.017699115	0.880797078	0.952574127	0.880797078	0.106819212	-0.604959216	N
0.912	2.865709488	0.068966673	0.078543062	0.0753741	0.074564484	0.646	0.728	0.6685	0.67775	0.006404392	0.880797078	0.880797078	0.880797078	0.135335283	-0.540415448	N
0.495575221	2.836701915	0.057964225	0.076581729	0.072759108	0.070016042	0.524	0.836	0.7135	0.69675	0.01980198	0.880797078	0.952574127	0.92414182	0.092561176	-0.572496029	N
0.751937984	8.713876015	0.011297615	0.011297615	0.011297615	0.011297615	0.46	0.46	0.46	0.46	0	0.952574127	0.952574127	0.952574127	0.049787068	-0.950212932	N
0.78597786	3.240623833	0.01757035	0.01757035	0.01757035	0.01757035	0.28	0.28	0.28	0.28	0	0.952574127	0.952574127	0.952574127	0.049787068	-0.950212932	N
0.803448276	3.980504945	0.0070458	0.009535217	0.007549544	0.00804352	0.056	0.459	0.347	0.287333333	0.010183299	0.880797078	0.952574127	0.952574127	0.07830314	-0.64980817	N
0.675862069	4.008954171	0.009718437	0.009718437	0.009718437	0.009718437	0.467	0.467	0.467	0.467	0.066666667	0.952574127	0.952574127	0.952574127	0.049787068	-0.950212932	N
0.76534296	4.947678233	0.010606926	0.020788672	0.01579423	0.015458606	0.272	0.538	0.367	0.3816	0.002164076	0.880797078	0.98201379	0.952574127	0.063749568	-0.518187358	N
0.894067797	4.0994908	0.008939612	0.008939612	0.008939612	0.008939612	0.323	0.323	0.323	0.323	0	0.952574127	0.952574127	0.952574127	0.049787068	-0.950212932	N
0.748251748	2.76328629	0.010568362	0.014470856	0.012519609	0.012519609	0.266	0.486	0.376	0.376	0	0.880797078	0.98201379	0.952574127	0.076825461	-0.685621306	N
0.735099338	4.09724943	0.014588166	0.030898629	0.026282253	0.025658962	0.455	0.823	0.776	0.7222	0.005706134	0.880797078	0.952574127	0.952574127	0.084006354	-0.559861973	N
0.715867159	5.653249408	0.011922404	0.016959287	0.012660327	0.01384734	0.41	0.434	0.423	0.422333333	0.002404713	0.880797078	0.880797078	0.880797078	0.135335283	-0.628119624	N
0.845864662	5.979076987	0.011194269	0.011334935	0.011264602	0.011264602	0.513	0.53	0.5215	0.5215	0	0.880797078	0.880797078	0.880797078	0.135335283	-0.648498538	N
0.817829457	2.933165577	0.01297615	0.01297615	0.01297615	0.01297615	0.482	0.482	0.482	0.482	0	0.952574127	0.952574127	0.952574127	0.049787068	-0.950212932	N
0.831417625	2.020063534	0.015000459	0.024534962	0.01976771	0.01976771	0.376	0.464	0.42	0.42	0	0.880797078	0.952574127	0.92414182	0.092561176	-0.669885591	N
0.577235772	4.180646254	0.008496083	0.009718437	0.009503739	0.00923942	0.416	0.467	0.429	0.437333333	0.023255814	0.952574127	0.952574127	0.952574127	0.049787068	-0.661991359	N
0.901869159	5.216811188	0.012371205	0.012371205	0.012371205	0.012371205	0.358	0.358	0.358	0.358	0.066666667	0.880797078	0.880797078	0.880797078	0.135335283	-0.864664717	N
0.820512821	4.317572685	0.015713427	0.096340834	0.056027131	0.056027131	0.393	0.515	0.454	0.454	0.028169014	0.880797078	0.98201379	0.952574127	0.076825461	-0.677753449	N
0.844827586	5.074408292	0.009597053	0.01198187	0.009958543	0.010512488	0.452	0.484	0.473	0.469666667	0	0.880797078	0.880797078	0.880797078	0.135335283	-0.628119624	N
0.854092527	5.214768347	0.009597053	0.016056145	0.012176537	0.01225671	0.152	0.488	0.4625	0.401166667	0.003389831	0.880797078	0.952574127	0.880797078	0.11822564	-0.560391843	N
0.924444444	2.594663564	0.014796084	0.08202569	0.072618874	0.069157514	0.507	0.836	0.6855	0.678208333	0.002778342	0.880797078	0.98201379	0.880797078	0.094814375	-0.458180787	N
0.808163265	2.216125539	0.010277116	0.011653076	0.010965096	0.010965096	0.102	0.397	0.2495	0.2495	0.02020202	0.952574127	0.952574127	0.952574127	0.049787068	-0.734046752	N
0.774703557	1.751159665	1	1	1	1	1	1	1	1	0.07106599	0.5	0.5	0.5	1	0	N
0.755932203	4.520878138	0.017119746	0.017119746	0.017119746	0.017119746	0.461	0.461	0.461	0.461	0	0.880797078	0.880797078	0.880797078	0.135335283	-0.864664717	N
0.80349345	4.20396773	0.182973955	0.18783756	0.185405758	0.185405758	0.662	0.713	0.6875	0.6875	0.026548673	0.880797078	0.880797078	0.880797078	0.135335283	-0.706634577	N
0.783783784	3.981430672	0.012209854	0.020782704	0.014296635	0.015763065	0.455	1	0.52	0.658333333	0.001386001	0.880797078	0.952574127	0.952574127	0.07830314	-0.633475288	N
0.803212851	2.297974077	0.013251241	0.017199728	0.015225484	0.015225484	0.467	0.473	0.47	0.47	0	0.880797078	0.880797078	0.880797078	0.135335283	-0.706634577	N
0.800724638	7.350940987	0.009952636	0.009952636	0.009952636	0.009952636	0.523	0.523	0.523	0.523	0.031496063	0.952574127	0.952574127	0.952574127	0.049787068	-0.950212932	N
0.841004184	2.961885217	0.014153307	0.023155842	0.014991815	0.017380437	0.134	0.484	0.39	0.36	0	0.880797078	0.952574127	0.952574127	0.071174122	-0.599229846	N
0.735042735	7.328436111	0.007868932	0.007868932	0.007868932	0.007868932	0.414	0.414	0.414	0.414	0.002971768	0.880797078	0.880797078	0.880797078	0.135335283	-0.864664717	N
0.781512605	2.886855709	0.157607398	0.157607398	0.157607398	0.157607398	0.49	0.49	0.49	0.49	0	0.952574127	0.952574127	0.952574127	0.049787068	-0.950212932	N
0.761245675	5.712006552	0.023890378	0.023890378	0.023890378	0.023890378	0.657	0.657	0.657	0.657	0	0.952574127	0.952574127	0.952574127	0.049787068	-0.950212932	N
0.873303167	2.177105168	0.012014977	0.014457078	0.013236027	0.013236027	0.406	0.44	0.423	0.423	0	0.880797078	0.952574127	0.92414182	0.092561176	-0.691272645	N
0.714814815	2.979884891	0.075397623	0.092224369	0.081710441	0.083110811	0.652	0.758	0.687	0.699	0.015367728	0.880797078	0.880797078	0.880797078	0.135335283	-0.592776027	N
0.875	3.911429632	0.012209854	0.021256718	0.013674327	0.015704249	0.418	1	0.5115	0.649333333	0.001178412	0.880797078	0.952574127	0.92414182	0.092561176	-0.537656502	N
0.650442478	3.327516789	0.009340501	0.009340501	0.009340501	0.009340501	0.521	0.521	0.521	0.521	0	0.952574127	0.952574127	0.952574127	0.049787068	-0.950212932	N
0.460465116	4.312425359	0.075397623	0.092224369	0.081710441	0.083110811	0.652	0.758	0.687	0.699	0.015367728	0.880797078	0.880797078	0.880797078	0.135335283	-0.592776027	N
0.726277372	2.417535898	0.019056518	0.023967308	0.021303375	0.0214424	0.532	0.754	0.569	0.618333333	0.023715415	0.952574127	0.98201379	0.970687769	0.034051354	-0.807918507	N
0.808163265	2.957900246	0.013011868	0.013537202	0.013274535	0.013274535	0.073	0.419	0.246	0.246	0	0.98201379	0.98201379	0.98201379	0.018315639	-0.765518182	N
0.823045267	5.51028199	0.015000459	0.027981997	0.016181659	0.018836443	0.185	0.407	0.3865	0.34125	0	0.880797078	0.952574127	0.880797078	0.106819212	-0.585948502	N
0.811023622	4.172930184	0.013799521	0.015713427	0.014756474	0.014756474	0.393	0.479	0.436	0.436	0	0.880797078	0.98201379	0.952574127	0.076825461	-0.70700836	N
0.788679245	4.475107485	0.011423342	0.011423342	0.011423342	0.011423342	0.341	0.341	0.341	0.341	0	0.952574127	0.952574127	0.952574127	0.049787068	-0.950212932	N
0.43062201	5.113972229	0.010606926	0.078543062	0.01579423	0.02068943	0.272	0.646	0.3785	0.40275	0.002144153	0.880797078	0.98201379	0.952574127	0.068551503	-0.501836974	N
0.774074074	6.963996171	0.00924617	0.00924617	0.00924617	0.00924617	0.507	0.507	0.507	0.507	0	0.952574127	0.952574127	0.952574127	0.049787068	-0.950212932	N
0.8	3.990347883	0.011802677	0.011892012	0.011847344	0.011847344	0.47	1	0.735	0.735	0	0.952574127	0.952574127	0.952574127	0.049787068	-0.734046752	N
0.855421687	4.036407587	0.014153307	0.068528721	0.014991815	0.032557948	0.366	0.7	0.39	0.485333333	0.005076142	0.880797078	0.952574127	0.952574127	0.07830314	-0.623969931	N
0.774703557	1.383130112	0.011922404	0.018749133	0.015003321	0.015162277	0.404	0.52	0.4455	0.449375	0.001507246	0.880797078	0.952574127	0.880797078	0.11394823	-0.52688859	N
0.886462882	2.997032984	0.068966673	0.078543062	0.074321997	0.074159339	0.646	0.728	0.676	0.6774	0.005266238	0.880797078	0.880797078	0.880797078	0.135335283	-0.51879883	N
0.734693878	3.43309189	0.009340501	0.010055884	0.009698193	0.009698193	0.521	0.535	0.528	0.528	0	0.952574127	0.952574127	0.952574127	0.049787068	-0.792182792	N
0.801369863	9.791303886	0.011594918	0.011594918	0.011594918	0.011594918	0.392	0.392	0.392	0.392	0	0.880797078	0.880797078	0.880797078	0.135335283	-0.864664717	N
0.852380952	5.309900887	0.012709326	0.012709326	0.012709326	0.012709326	0.389	0.389	0.389	0.389	0	0.880797078	0.880797078	0.880797078	0.135335283	-0.864664717	N
0.84962406	3.2681169	0.157607398	0.157607398	0.157607398	0.157607398	0.49	0.49	0.49	0.49	0	0.952574127	0.952574127	0.952574127	0.049787068	-0.950212932	N
0.766990291	3.475038511	0.009718437	0.015584726	0.012651582	0.012651582	0.414	0.467	0.4405	0.4405	0.034482759	0.952574127	0.952574127	0.952574127	0.049787068	-0.734046752	N
0.834080717	3.263064394	0.009082884	0.027325024	0.018094842	0.017566512	0.346	0.52	0.432	0.429	0.002115283	0.880797078	0.98201379	0.880797078	0.101573973	-0.517389934	N
0.693670886	4.48263128	0.01807823	0.01807823	0.01807823	0.01807823	0.158	0.158	0.158	0.158	0	0.952574127	0.952574127	0.952574127	0.049787068	-0.950212932	N
0.814655172	2.682933315	0.075397623	0.092224369	0.081710441	0.083110811	0.652	0.758	0.687	0.699	0.015367728	0.880797078	0.880797078	0.880797078	0.135335283	-0.592776027	N
0.62295082	2.219475483	0.009503739	0.026114412	0.01356454	0.014041292	0.376	0.595	0.451	0.4561	0.002975207	0.880797078	0.952574127	0.880797078	0.109670819	-0.514086221	N
0.808988764	2.659648126	0.014153307	0.084138702	0.072567616	0.06272662	0.39	0.836	0.674	0.64425	0.006232147	0.731058579	0.952574127	0.880797078	0.119068874	-0.457445161	N
0.662745098	3.721004309	0.009340501	0.009340501	0.009340501	0.009340501	0.521	0.521	0.521	0.521	0	0.952574127	0.952574127	0.952574127	0.049787068	-0.950212932	N
0.80349345	3.74890512	0.012030046	0.016638225	0.013147226	0.014140203	0.349	0.489	0.399	0.4108	0.004754358	0.880797078	0.952574127	0.952574127	0.066896711	-0.570127759	N
0.803773585	5.047487382	0.009527254	0.020788672	0.010970206	0.013064085	0.336	0.473	0.419	0.41175	0.002849003	0.880797078	0.952574127	0.92414182	0.092561176	-0.581683275	N
0.822660099	5.241839418	0.009597053	0.01198187	0.011619461	0.011066128	0.449	0.484	0.473	0.468666667	0	0.880797078	0.880797078	0.880797078	0.135335283	-0.628119624	N
0.775	5.234614921	0.009597053	0.01198187	0.011619461	0.011066128	0.449	0.484	0.473	0.468666667	0	0.880797078	0.880797078	0.880797078	0.135335283	-0.628119624	N
0.694656489	3.515421801	0.068528721	0.092224369	0.075397623	0.078608942	0.652	0.758	0.7	0.7002	0.01130742	0.880797078	0.952574127	0.880797078	0.101115997	-0.54983122	N
0.766393443	6.083617704	0.012788858	0.016638225	0.016393157	0.015273414	0.388	0.596	0.444	0.476	0.001828154	0.880797078	0.952574127	0.952574127	0.07830314	-0.633475288	N
0.768545994	5.219938976	0.009597053	0.013575443	0.01198187	0.011718122	0.473	0.488	0.484	0.481666667	0	0.880797078	0.952574127	0.880797078	0.106819212	-0.630797456	N
0.663043478	5.127149474	0.003072946	0.024011243	0.009730254	0.01090815	0.178	0.654	0.449	0.438333333	0.002096436	0.880797078	0.952574127	0.880797078	0.106819212	-0.316737644	N
0.852112676	1.354545651	0.008312239	1	0.017214505	0.187317488	0.157	1	0.5885	0.569166667	0.014702703	0.5	0.880797078	0.880797078	0.279446069	0	N
0.807407407	6.366423984	0.006045569	0.042937055	0.013689295	0.016070766	0.157	0.636	0.538	0.47975	0.001834862	0.880797078	0.952574127	0.880797078	0.128206265	-0.176573974	N
0.79916318	4.606492325	0.008686028	0.01799041	0.013237409	0.013429302	0.178	0.676	0.603	0.522833333	0.004192872	0.880797078	0.952574127	0.92414182	0.092561176	-0.547161859	N
0.696774194	6.721871631	0.004578344	0.024475433	0.01000933	0.010461499	0.107	0.592	0.311	0.322533333	0	0.880797078	0.952574127	0.92414182	0.092561176	-0.1735659	N
0.769736842	3.991193958	0.007245034	0.024159006	0.014689538	0.014279382	0.15	0.628	0.521	0.455833333	0	0.880797078	0.880797078	0.880797078	0.135335283	-0.346357612	N
0.746987952	4.502470115	0.006216365	0.015633992	0.009491865	0.009924179	0.14	0.644	0.5125	0.4485	0.00182964	0.731058579	0.880797078	0.880797078	0.140179953	-0.146686785	N
0.715909091	3.90697133	0.007238125	0.019488986	0.012632705	0.013283198	0.102	0.155	0.102	0.119666667	0	0.952574127	0.952574127	0.952574127	0.049787068	-0.589935966	N
0.695238095	5.989733862	0.006365697	0.0171611	0.010996205	0.011399647	0.147	0.586	0.21	0.322666667	0.003919647	0.880797078	0.952574127	0.92414182	0.092561176	-0.389131719	N
0.81875	5.995057384	0.011193039	0.020067465	0.015283604	0.015610989	0.177	0.66	0.557	0.4935	0	0.880797078	0.880797078	0.880797078	0.135335283	-0.504387751	N
0.784810127	3.238643163	0.008018096	0.016426486	0.010875418	0.011705075	0.189	0.586	0.533	0.466333333	0	0.880797078	0.952574127	0.880797078	0.106819212	-0.532903823	N
0.979166667	2.671607936	0.005511642	0.009994522	0.008891022	0.008465006	0.161	0.701	0.555	0.5025	0.007326007	0.880797078	0.880797078	0.880797078	0.135335283	-0.346357612	N
0.74829932	3.933859466	0.008576899	0.016495498	0.012838231	0.012296846	0.109	0.167	0.119	0.131833333	0	0.880797078	0.880797078	0.880797078	0.135335283	-0.504387751	N
0.789473684	6.84607652	0.005171387	0.023078763	0.009860196	0.010629182	0.04	1	0.376	0.3963	0.002638522	0.880797078	0.952574127	0.952574127	0.07830314	-0.190281845	N
0.651162791	4.787620705	0.007685654	0.08937376	0.011100712	0.018115185	0.163	0.756	0.5395	0.505416667	0.00209937	0.880797078	0.880797078	0.880797078	0.135335283	-0.288221572	N
0.683544304	4.486130222	0.0062043	1	0.010997905	0.046448586	0.157	1	0.5025	0.494433333	0.008507347	0.5	0.880797078	0.880797078	0.16415744	-0.126277779	N
0.78030303	4.512710591	0.004810964	0.014946628	0.007885635	0.008548592	0.148	0.375	0.327	0.3035	0	0.880797078	0.880797078	0.880797078	0.135335283	-0.504387751	N
0.765822785	3.885633808	0.005644638	0.274720449	0.010833871	0.019580926	0.149	0.835	0.51	0.465866667	0.002204262	0.731058579	0.952574127	0.880797078	0.128828719	-0.147918786	N
0.70984456	7.132357491	0.009099827	0.020418087	0.015807406	0.015911536	0.2	0.382	0.218	0.250333333	0	0.880797078	0.880797078	0.880797078	0.135335283	-0.504387751	N
0.693069307	3.188427516	0.009024579	1	0.011688344	0.176399999	0.157	1	0.5065	0.538833333	0	0.5	0.880797078	0.880797078	0.279446069	-0.360276965	N
0.628787879	6.043868445	0.009024579	1	0.011688344	0.176399999	0.157	1	0.5065	0.538833333	0	0.5	0.880797078	0.880797078	0.279446069	-0.360276965	N
0.552	6.071955513	0.004634563	0.030092042	0.011883075	0.012559983	0.044	1	0.4345	0.381260417	0.000744574	0.880797078	0.952574127	0.952574127	0.086323285	-0.120259201	N
0.826086957	6.063593308	0.005688451	0.008809909	0.007388958	0.00734316	0.05	0.154	0.0755	0.082833333	0	0.880797078	0.952574127	0.952574127	0.07830314	-0.561419895	N
0.859375	4.036692916	0.004810964	0.014946628	0.007885635	0.008548592	0.148	0.375	0.327	0.3035	0	0.880797078	0.880797078	0.880797078	0.135335283	-0.504387751	N
0.85046729	6.120851274	0.00653711	0.01280107	0.009647177	0.009576039	0.164	0.505	0.426	0.392	0.007346939	0.731058579	0.952574127	0.880797078	0.159834607	-0.479888428	N
0.64375	2.520643895	0.003791623	0.008993749	0.006683267	0.006435763	0.145	0.563	0.4995	0.459666667	0.006431853	0.880797078	0.880797078	0.880797078	0.135335283	-0.504387751	N
0.674033149	5.831420925	0.005382598	0.013730111	0.008483098	0.008727208	0.121	0.558	0.465	0.400166667	0	0.880797078	0.952574127	0.880797078	0.11394823	-0.288221572	N
0.595041322	5.115249581	0.00652649	0.023269327	0.011890856	0.012637436	0.109	0.608	0.4795	0.412181818	0.001503885	0.731058579	0.952574127	0.880797078	0.097380757	-0.124295058	N
0.728915663	7.244645498	0.007321821	0.020332602	0.012166154	0.012269441	0.155	0.5	0.355	0.328208333	0	0.880797078	0.952574127	0.952574127	0.088996667	-0.215783572	N
0.837563452	4.867077906	0.006438595	0.092254693	0.013680848	0.024117684	0.066	0.933	0.4975	0.464357143	0.000860383	0.731058579	0.952574127	0.880797078	0.160982249	-0.149136503	N
0.715053763	4.766639329	0.005258706	0.012503086	0.00835227	0.0084678	0.154	0.643	0.5415	0.48775	0.003534568	0.731058579	0.880797078	0.880797078	0.154713963	-0.326978932	N
0.751515152	6.659183442	0.006879357	0.030092042	0.01240736	0.01335848	0.117	0.635	0.4965	0.402930556	0.000452468	0.880797078	0.952574127	0.952574127	0.089968806	-0.145322951	N
0.767123288	3.657382043	0.00747217	0.076436739	0.011663756	0.02165555	0.158	0.77	0.5385	0.521333333	0.004192872	0.731058579	0.880797078	0.880797078	0.174092643	-0.465630392	N
0.722222222	4.852164931	0.007422095	0.023196238	0.013171015	0.013758563	0.15	0.517	0.4735	0.410944444	0.002259887	0.880797078	0.880797078	0.880797078	0.135335283	-0.267842659	N
0.844444444	6.154035456	0.006365697	0.0171611	0.010996205	0.011399647	0.147	0.586	0.21	0.322666667	0.003919647	0.880797078	0.952574127	0.92414182	0.092561176	-0.389131719	N
0.732026144	4.7767598	0.006837653	0.058448686	0.011195768	0.018424584	0.16	0.834	0.4775	0.498833333	0	0.880797078	0.880797078	0.880797078	0.135335283	-0.504387751	N
0.837837838	5.840680821	0.006520194	0.086160204	0.011037657	0.013380827	0.064	0.816	0.111	0.1866	0	0.880797078	0.952574127	0.880797078	0.106819212	-0.29535059	N
0.753246753	5.027364554	0.007422095	0.023196238	0.013171015	0.013758563	0.15	0.517	0.4735	0.410944444	0.002259887	0.880797078	0.880797078	0.880797078	0.135335283	-0.267842659	N
0.906542056	6.54260452	0.005547866	0.030092042	0.012418568	0.013708782	0.147	0.861	0.5245	0.478527778	0.002092358	0.731058579	0.952574127	0.880797078	0.115655111	-0.111763776	N
0.775	6.477942459	0.004810964	0.021061406	0.010020209	0.0112252	0.145	0.587	0.425	0.3884	0.003127932	0.880797078	0.952574127	0.880797078	0.101115997	-0.168787651	N
0.72	5.085503434	0.007422095	0.024260302	0.013601547	0.014037196	0.15	0.695	0.494	0.450277778	0.010279001	0.880797078	0.880797078	0.880797078	0.135335283	-0.242004419	N
0.824786325	6.235100393	0.005011947	1	0.013292206	0.034125278	0.143	1	0.5345	0.461116667	0.006269235	0.5	0.98201379	0.880797078	0.117854159	-0.112749047	N
0.788135593	4.69014237	0.005494893	0.076436739	0.012278893	0.014511797	0.088	0.856	0.484	0.412880952	0.003985159	0.731058579	0.952574127	0.880797078	0.128650875	-0.139517873	N
0.741258741	4.794482099	0.006837653	0.058448686	0.01193562	0.016396469	0.16	0.834	0.5205	0.486833333	0	0.880797078	0.880797078	0.880797078	0.135335283	-0.288221572	N
0.846938776	6.103837593	0.004410088	0.025577413	0.008589567	0.010625705	0	0	0	0	0.005004692	0.731058579	0.952574127	0.952574127	0.094268057	-0.159666206	N
0.633540373	4.731141016	0.006504843	1	0.010719008	0.105956346	0.032	1	0.1135	0.3325	0.016771488	0.5	0.880797078	0.880797078	0.207390676	-0.216166179	N
0.824242424	6.879753617	0.007338071	0.022702643	0.013192666	0.01397269	0.167	0.642	0.473	0.448666667	0	0.880797078	0.952574127	0.880797078	0.106819212	-0.225671536	N
0.761627907	7.396343072	0.007045701	0.023659166	0.012945192	0.014082786	0	0	0	0	0	0.880797078	0.880797078	0.880797078	0.135335283	-0.288221572	N
0.653061224	6.90127711	0.007509306	0.02232755	0.01301135	0.013864284	0.128	0.577	0.305	0.317111111	0	0.880797078	0.880797078	0.880797078	0.135335283	-0.216166179	N
0.761904762	2.9245975	0.006378381	0.018247465	0.010713663	0.010261223	0.064	0.66	0.114	0.211777778	0	0.880797078	0.880797078	0.880797078	0.135335283	-0.504387751	N
0.73006135	4.129983176	0.004578878	0.019308328	0.008378567	0.008663532	0.088	0.569	0.329	0.3068125	0.000226193	0.731058579	0.952574127	0.880797078	0.111663882	-0.137829931	N
0.67032967	4.75706076	0.005157305	0.022317134	0.011718403	0.012340813	0.034	0.66	0.5005	0.396547619	0.000948542	0.880797078	0.952574127	0.880797078	0.102066533	-0.17841696	N
0.762264151	6.05271668	0.005813904	0.015487077	0.009162737	0.009873209	0.168	0.664	0.5395	0.482111111	0.00244898	0.880797078	0.880797078	0.880797078	0.135335283	-0.293680899	N
0.725388601	5.531052855	0.005906575	0.0252412	0.013513657	0.013503375	0.051	0.519	0.0985	0.195388889	0	0.880797078	0.952574127	0.880797078	0.099690194	-0.302479608	N
0.897959184	4.866092401	0.006617093	0.009377278	0.008516385	0.008287604	0.171	0.701	0.5915	0.543666667	0.014492754	0.880797078	0.880797078	0.880797078	0.135335283	-0.504387751	N
0.757281553	4.797675492	0.00586377	0.012880069	0.009880694	0.009697079	0.032	0.796	0.1105	0.301	0	0.880797078	0.880797078	0.880797078	0.135335283	-0.288221572	N
0.791855204	6.565141998	0.007322046	0.021999836	0.013034547	0.013085346	0.164	0.609	0.528	0.463	0.000801925	0.880797078	0.952574127	0.952574127	0.068797783	-0.334380159	N
0.753768844	5.410330782	0.006378381	0.032027199	0.012028934	0.013747574	0.106	0.66	0.47	0.394285714	0.002027369	0.880797078	0.98201379	0.952574127	0.083991533	-0.162628472	N
0.857142857	4.801063657	0.004832363	0.015957254	0.008741452	0.009429224	0.145	0.672	0.3705	0.375388889	0	0.880797078	0.952574127	0.952574127	0.083055819	-0.236432747	N
0.757446809	5.538755633	0.006455543	1	0.012978569	0.03947843	0.146	1	0.506	0.493	0.005513017	0.5	0.952574127	0.880797078	0.162550741	-0.133764316	N
0.836158192	3.098204642	0.006378381	0.022234457	0.011644637	0.012742605	0.128	0.66	0.3725	0.377916667	0	0.880797078	0.952574127	0.92414182	0.092561176	-0.309608626	N
0.737931034	6.419283301	0.007322046	0.030092042	0.013034547	0.014347782	0.147	0.687	0.528	0.469166667	0.001782432	0.880797078	0.952574127	0.952574127	0.090778921	-0.169523589	N
0.525773196	4.784424997	0.004274375	0.051264632	0.01062196	0.012289684	0.04	0.842	0.443	0.361115385	0.000885658	0.731058579	0.952574127	0.880797078	0.102123143	-0.113463571	N
0.606299213	3.803167362	0.006284324	0.033384954	0.02072304	0.019683963	0.191	0.653	0.5175	0.471555556	0	0.880797078	0.952574127	0.880797078	0.106819212	-0.225671536	N
0.86163522	5.630033744	0.011336936	0.024475433	0.012724492	0.014386651	0.134	0.33	0.2655	0.256666667	0	0.880797078	0.952574127	0.952574127	0.07830314	-0.561419895	N
0.928571429	5.162450135	0.007422095	0.023196238	0.013171015	0.013758563	0.15	0.517	0.4735	0.410944444	0.002259887	0.880797078	0.880797078	0.880797078	0.135335283	-0.267842659	N
0.668965517	7.013146154	0.007543073	0.016925062	0.012488122	0.011928615	0.128	0.472	0.192	0.248416667	0	0.880797078	0.880797078	0.880797078	0.135335283	-0.504387751	N
0.702247191	5.094089342	0.008840347	0.32379258	0.012862475	0.06494768	0.174	0.778	0.476	0.489	0.007326007	0.880797078	0.880797078	0.880797078	0.135335283	-0.504387751	N
0.805194805	4.616698388	0.007422095	0.023196238	0.013171015	0.013758563	0.15	0.517	0.4735	0.410944444	0.002259887	0.880797078	0.880797078	0.880797078	0.135335283	-0.267842659	N
0.708860759	5.347301175	0.008108366	0.015877927	0.014775213	0.013283452	0.122	0.319	0.286	0.2535	0	0.952574127	0.98201379	0.952574127	0.04454183	-0.595181205	N
0.696774194	3.563827763	0.006335591	0.020462097	0.01040556	0.011100638	0.063	0.528	0.148	0.259958333	0	0.880797078	0.98201379	0.952574127	0.048801949	-0.267189791	N
0.816608997	4.573423695	0.006289164	0.017123781	0.011678201	0.011864952	0.17	0.726	0.5125	0.488166667	0.003673769	0.731058579	0.880797078	0.880797078	0.161173523	-0.242004419	N
0.603448276	4.769571922	0.008208412	0.030092042	0.012331009	0.013999635	0.147	0.595	0.499	0.436722222	0.00067858	0.880797078	0.952574127	0.880797078	0.106819212	-0.261015133	N
0.777227723	5.390737139	0.005812875	0.023196238	0.012124596	0.012369791	0.15	0.517	0.451	0.405791667	0.003457217	0.880797078	0.880797078	0.880797078	0.135335283	-0.209206502	N
0.74301676	5.023028621	0.005812875	0.010086481	0.008120872	0.008203476	0.235	0.517	0.4105	0.390333333	0.007326007	0.880797078	0.880797078	0.880797078	0.135335283	-0.504387751	N
0.787401575	4.49489499	0.006504843	0.019981871	0.011177484	0.012766676	0.032	0.271	0.13	0.140416667	0	0.880797078	0.952574127	0.880797078	0.106819212	-0.29535059	N
0.765957447	4.230035214	0.004810964	0.018680954	0.008913081	0.010780674	0.148	0.608	0.355	0.382916667	0	0.880797078	0.952574127	0.92414182	0.092561176	-0.33099568	N
0.554621849	4.76800471	0.008156893	0.024546672	0.012651807	0.014082659	0.152	0.552	0.501	0.437333333	0.002098636	0.880797078	0.952574127	0.880797078	0.121077247	-0.518645787	N
0.773480663	6.973359149	0.00652649	0.020247785	0.011537865	0.01184224	0.087	0.594	0.461	0.380444444	0.002169197	0.731058579	0.952574127	0.880797078	0.111719076	-0.169649409	N
0.705882353	5.139326324	0.006678196	0.034861447	0.012488774	0.013514908	0.109	0.604	0.452	0.397219298	0.000554928	0.880797078	0.952574127	0.952574127	0.082055255	-0.120992568	N
0.846153846	4.764210415	0.006906113	0.020890998	0.012319424	0.012610178	0.155	0.551	0.483	0.418416667	0.002096436	0.880797078	0.98201379	0.970687769	0.069696443	-0.324605501	N
0.840206186	4.250274178	0.008156893	0.024546672	0.014830825	0.015039012	0.152	0.783	0.5245	0.494416667	0.004200798	0.731058579	0.952574127	0.880797078	0.166963625	-0.256593231	N
0.756218905	4.764927508	0.00512254	0.016235259	0.009077324	0.009340301	0.132	0.622	0.5155	0.44925	0.001421811	0.731058579	0.952574127	0.880797078	0.136359412	-0.123566266	N
0.727810651	4.113608496	0.007492076	0.03126651	0.012982218	0.014556019	0.191	0.73	0.461	0.460611111	0	0.880797078	0.880797078	0.880797078	0.135335283	-0.242004419	N
0.729281768	5.386319978	0.008173651	0.018512399	0.010871636	0.011963101	0.169	0.29	0.2615	0.247666667	0	0.880797078	0.952574127	0.92414182	0.092561176	-0.547161859	N
0.7875	5.390842579	0.005906575	0.026188407	0.010863592	0.012135006	0.051	0.545	0.128	0.2455	0	0.880797078	0.952574127	0.952574127	0.056916086	-0.337385858	N
0.698795181	2.477147321	0.006879357	0.023224916	0.012285942	0.013616349	0.139	0.728	0.4085	0.388222222	0.003891051	0.880797078	0.880797078	0.880797078	0.135335283	-0.288221572	N
0.701754386	4.843612717	0.006284707	1	0.012710677	0.032592763	0.065	1	0.507	0.453648148	0.004655722	0.5	0.952574127	0.880797078	0.160311662	-0.122586331	N
0.824324324	4.451545324	0.006837653	0.058448686	0.012356106	0.015028464	0	0	0	0	0	0.880797078	0.952574127	0.880797078	0.106819212	-0.235176894	N
0.739795918	5.22610373	0.00747217	0.076436739	0.011663756	0.02165555	0.158	0.77	0.5385	0.521333333	0.004192872	0.731058579	0.880797078	0.880797078	0.174092643	-0.465630392	N
0.823943662	5.175916088	0.005906575	0.026188407	0.01301442	0.013677701	0.051	0.59	0.4065	0.3355	0	0.880797078	0.952574127	0.952574127	0.074738631	-0.212034353	N
0.745098039	4.928392845	0.008208412	0.030092042	0.012282784	0.014012099	0.147	0.595	0.5035	0.44625	0.001297017	0.880797078	0.952574127	0.880797078	0.11394823	-0.309608626	N
0.836956522	4.48378353	0.008840347	0.32379258	0.012862475	0.06494768	0.174	0.778	0.476	0.489	0.007326007	0.880797078	0.880797078	0.880797078	0.135335283	-0.504387751	N
0.568807339	6.168632544	0.007288235	1	0.01281775	0.067525297	0.128	1	0.421	0.375277778	0	0.5	0.880797078	0.880797078	0.207390676	-0.216166179	N
0.548387097	6.459344366	0.006678196	0.034861447	0.012343329	0.013826322	0.167	0.604	0.476	0.4363	0.001075847	0.880797078	0.952574127	0.952574127	0.081154747	-0.202436615	N
0.785714286	4.068463539	0.005306347	0.051264632	0.010578506	0.01086345	0.038	0.842	0.4765	0.405366667	0.000821125	0.880797078	0.952574127	0.880797078	0.093986979	-0.131272231	N
0.774703557	4.132079383	0.004810964	0.021061406	0.008946645	0.011003807	0.148	0.587	0.347	0.372916667	0	0.880797078	0.952574127	0.92414182	0.092561176	-0.309608626	N
0.707964602	4.926871064	0.005213184	0.32379258	0.013789188	0.026253791	0.09	0.778	0.298	0.346333333	0.00284495	0.880797078	0.880797078	0.880797078	0.135335283	-0.167823631	N
0.765765766	5.813612601	0.004994749	0.019896043	0.009449248	0.009870866	0.224	1	0.493	0.645083333	0.004724409	0.880797078	0.880797078	0.880797078	0.135335283	-0.288221572	N
0.842519685	6.835001295	0.006081338	0.027105288	0.012029642	0.0125254	0.055	1	0.3315	0.398866667	0.00284495	0.880797078	0.952574127	0.880797078	0.121077247	-0.178356228	N
0.740384615	6.461658018	0.00556638	0.013863654	0.008339503	0.008859291	0.164	0.332	0.306	0.2815	0	0.880797078	0.880797078	0.880797078	0.135335283	-0.504387751	N
0.808510638	6.144469119	0.010237692	0.020252175	0.013577681	0.014628138	0.153	0.608	0.5465	0.478166667	0	0.880797078	0.952574127	0.952574127	0.07830314	-0.561419895	N
0.7125	5.624935671	0.004578344	0.023196238	0.01196815	0.012203709	0.147	1	0.4705	0.451511905	0.001620039	0.731058579	0.952574127	0.880797078	0.09634799	-0.120982593	N
0.721428571	5.732337831	0.00586377	0.026282838	0.012061687	0.012440363	0.161	0.796	0.577	0.524833333	0.009791922	0.731058579	0.880797078	0.880797078	0.154713963	-0.268842892	N
0.795031056	5.755249308	0.006994504	0.018331188	0.01260413	0.012250555	0.151	0.666	0.5725	0.511033333	0.000941066	0.731058579	0.952574127	0.880797078	0.140235148	-0.181527299	N
0.605504587	2.767075326	0.009395516	0.016047163	0.012525476	0.01229451	0.202	0.681	0.634	0.55975	0.005513017	0.731058579	0.880797078	0.880797078	0.193471323	-0.288221572	N
0.748344371	4.09066373	0.00826823	0.018413955	0.010814683	0.011651508	0.134	0.705	0.213	0.339166667	0	0.880797078	0.952574127	0.880797078	0.099690194	-0.323866662	N
0.64640884	5.575171817	0.005688451	0.025030833	0.012952603	0.013192914	0.05	0.604	0.3435	0.314217949	0.001599251	0.731058579	0.952574127	0.952574127	0.081284475	-0.130505358	N
0.683870968	4.551427264	0.007076419	0.025242817	0.013124349	0.01405961	0.102	0.64	0.1285	0.20725	0	0.880797078	0.952574127	0.952574127	0.07830314	-0.230317582	N
0.78030303	4.72738242	0.006678196	0.025030833	0.014316522	0.01507805	0.154	0.604	0.5035	0.451555556	0.002940721	0.731058579	0.952574127	0.92414182	0.105480296	-0.271859407	N
0.758928571	5.377756492	0.006780023	0.019872457	0.008733219	0.010126798	0.164	0.683	0.551	0.507666667	0.003663004	0.880797078	0.880797078	0.880797078	0.135335283	-0.504387751	N
0.740384615	6.646869118	0.005468016	0.023078763	0.011132435	0.011851346	0.086	1	0.517	0.512892857	0.001304399	0.731058579	0.952574127	0.880797078	0.119484995	-0.101909527	N
0.759259259	4.922639889	0.004810964	0.020604699	0.011963141	0.012073137	0.148	0.73	0.355	0.416333333	0	0.880797078	0.952574127	0.880797078	0.106819212	-0.29535059	N
0.713541667	5.622761463	0.0072226	0.023312245	0.010992628	0.012191685	0.082	0.661	0.454	0.386366667	0.004878049	0.880797078	0.952574127	0.952574127	0.087808497	-0.235176894	N
0.787401575	4.228562161	0.006191195	0.024011243	0.012660098	0.013401092	0.089	0.473	0.2605	0.263125	0	0.880797078	0.880797078	0.880797078	0.135335283	-0.194672493	N
0.807228916	5.153219136	0.007422095	0.026791498	0.013911958	0.014811278	0.15	0.598	0.476	0.420875	0.004897959	0.880797078	0.952574127	0.880797078	0.121077247	-0.212771011	N
0.859813084	5.317239558	0.005644638	0.014764207	0.00923748	0.009614087	0.149	0.615	0.532	0.47	0	0.880797078	0.952574127	0.952574127	0.064045104	-0.575677931	N
0.701492537	5.961526059	0.00655566	0.026504102	0.0117788	0.012330248	0.156	1	0.575	0.58775	0.005052825	0.880797078	0.952574127	0.880797078	0.121077247	-0.183702992	N
0.731707317	4.667892908	0.004274375	0.015512065	0.007976212	0.008432475	0.04	0.597	0.363	0.320714286	0.000997975	0.880797078	0.952574127	0.952574127	0.090524314	-0.148767195	N
0.584507042	5.41436475	0.008156893	0.08937376	0.010894885	0.019288395	0.152	0.756	0.518	0.483916667	0.002004008	0.880797078	0.952574127	0.880797078	0.128206265	-0.29535059	N
0.872	3.194300419	0.0096474	0.021105558	0.014603164	0.014717929	0.184	0.648	0.5495	0.484833333	0.004192872	0.952574127	0.952574127	0.952574127	0.049787068	-0.589935966	N
0.919642857	5.871363079	0.008060241	0.274720449	0.012838231	0.027264397	0.108	0.835	0.1585	0.203055556	0	0.731058579	0.952574127	0.880797078	0.119738331	-0.212752417	N
0.710144928	5.801976532	0.012220513	0.024011243	0.016547755	0.017166471	0.265	0.473	0.352	0.363166667	0	0.880797078	0.880797078	0.880797078	0.135335283	-0.504387751	N
0.692307692	4.653696285	0.007422095	0.020976558	0.012848072	0.012831934	0.15	0.517	0.4735	0.413333333	0.003669725	0.880797078	0.880797078	0.880797078	0.135335283	-0.346357612	N
0.714285714	7.049994627	0.006174314	0.014561811	0.010835442	0.010511191	0.162	0.595	0.485	0.443583333	0.00729927	0.880797078	0.952574127	0.952574127	0.064045104	-0.359511751	N
0.767326733	3.404359439	0.006030615	0.011152675	0.00856716	0.008623964	0.182	0.665	0.5025	0.466916667	0.000979432	0.880797078	0.880797078	0.880797078	0.135335283	-0.288221572	N
0.699346405	4.316060066	0.005420728	0.015926139	0.008997423	0.009496211	0.14	0.596	0.5165	0.449805556	0.001779887	0.731058579	0.880797078	0.880797078	0.154713963	-0.144110786	N
0.654676259	4.766945775	0.006418327	0.014319076	0.011670968	0.010959637	0.143	0.513	0.4705	0.407333333	0	0.952574127	0.952574127	0.952574127	0.049787068	-0.589935966	N
0.705479452	5.462611489	0.004634563	0.026188407	0.011301259	0.011873161	0.044	0.648	0.28	0.303777778	0.001690046	0.880797078	0.952574127	0.880797078	0.097313854	-0.125931233	N
0.860759494	5.498751895	0.007873031	0.096361643	0.014010355	0.0186603	0.126	0.933	0.4415	0.408564815	0.001187323	0.731058579	0.952574127	0.880797078	0.132095296	-0.097063445	N
0.846938776	4.170751697	0.007322046	0.021999836	0.013034547	0.013085346	0.164	0.609	0.528	0.463	0.000801925	0.880797078	0.952574127	0.952574127	0.068797783	-0.334380159	N
0.71969697	4.248492881	0.008156893	0.024546672	0.012651807	0.014082659	0.152	0.552	0.501	0.437333333	0.002098636	0.880797078	0.952574127	0.880797078	0.121077247	-0.518645787	N
0.698224852	4.86162946	0.008208412	0.030092042	0.012282784	0.014012099	0.147	0.595	0.5035	0.44625	0.001297017	0.880797078	0.952574127	0.880797078	0.11394823	-0.309608626	N
0.845659164	2.448796177	0.013417439	0.02680396	0.019333279	0.019745837	0.188	0.59	0.571	0.5005	0	0.880797078	0.880797078	0.880797078	0.135335283	-0.504387751	N
0.691489362	5.470931982	0.00747217	0.076436739	0.012972846	0.017719643	0.158	0.77	0.557	0.506916667	0.004192872	0.731058579	0.952574127	0.880797078	0.126197891	-0.297358964	N
0.746987952	6.254898456	0.009270931	0.020252175	0.012048335	0.013393362	0.153	0.608	0.5285	0.46175	0	0.880797078	0.952574127	0.952574127	0.064045104	-0.33025684	N
0.754966887	5.446449436	0.008208412	0.030092042	0.012282784	0.014012099	0.147	0.595	0.5035	0.44625	0.001297017	0.880797078	0.952574127	0.880797078	0.11394823	-0.309608626	N
0.652941176	4.174482879	0.008156893	0.024546672	0.012651807	0.014082659	0.152	0.552	0.501	0.437333333	0.002098636	0.880797078	0.952574127	0.880797078	0.121077247	-0.518645787	N
0.859550562	5.610400927	0.007500003	0.030092042	0.012646986	0.013906215	0.147	0.595	0.496	0.434266667	0.000436745	0.880797078	0.952574127	0.880797078	0.101115997	-0.189554255	N
0.852564103	3.921715919	0.004810964	0.014946628	0.007885635	0.008548592	0.148	0.375	0.327	0.3035	0	0.880797078	0.880797078	0.880797078	0.135335283	-0.504387751	N
0.785276074	4.906660554	0.007422095	0.023196238	0.013171015	0.013758563	0.15	0.517	0.4735	0.410944444	0.002259887	0.880797078	0.880797078	0.880797078	0.135335283	-0.267842659	N
0.727272727	3.99782504	0.006378381	1	0.011093786	0.047505608	0.128	1	0.3015	0.391944444	0.000864304	0.5	0.952574127	0.880797078	0.166205698	-0.124229521	N
0.632653061	5.479449979	0.007313877	0.016410793	0.012715999	0.01227015	0.087	0.148	0.103	0.112833333	0	1	0				N
0.61589404	5.34399224	0.005644638	0.014764207	0.00923748	0.009614087	0.149	0.615	0.532	0.47	0	0.880797078	0.952574127	0.952574127	0.064045104	-0.575677931	N
0.774193548	5.78606996	0.007891257	0.021355309	0.01354989	0.013601252	0.139	0.569	0.3695	0.383055556	0	0.880797078	0.952574127	0.880797078	0.116324569	-0.235176894	N
0.834482759	4.198030501	0.008011971	0.013240244	0.012666334	0.011390394	0.183	0.724	0.664	0.5815	0.024390244	0.731058579	0.880797078	0.880797078	0.212850003	-0.426873032	N
0.768817204	5.387371136	0.007245034	0.018933837	0.013286852	0.013073937	0.165	0.597	0.521	0.45	0	0.880797078	0.880797078	0.880797078	0.135335283	-0.504387751	N
0.760683761	6.847578035	0.005298769	0.011706405	0.009025086	0.008732035	0.04	0.14	0.0675	0.073166667	0.004192872	0.952574127	0.952574127	0.952574127	0.049787068	-0.589935966	N
0.789029536	4.510764881	0.005246334	0.015063734	0.008733032	0.008930565	0.132	0.596	0.5125	0.443395833	0.001249954	0.880797078	0.952574127	0.880797078	0.131770774	-0.144195457	N
0.836956522	4.35080335	0.006617093	0.009377278	0.008516385	0.008287604	0.171	0.701	0.5915	0.543666667	0.014492754	0.880797078	0.880797078	0.880797078	0.135335283	-0.504387751	N
0.678787879	4.3358448	0.007429683	0.022029627	0.01305612	0.013217185	0.136	0.502	0.4035	0.363966667	0.002651561	0.880797078	0.952574127	0.952574127	0.064045104	-0.229812044	N
0.882352941	4.176904563	0.008018096	0.035915002	0.016097272	0.017040465	0.161	0.586	0.5475	0.47075	0.014652015	0.731058579	0.952574127	0.880797078	0.119068874	-0.304487982	N
0.732142857	4.354462114	0.006030615	0.015653185	0.009277036	0.009853769	0.167	0.666	0.525	0.483555556	0.001781737	0.880797078	0.880797078	0.880797078	0.135335283	-0.216166179	N
0.842931937	4.626571517	0.006504843	0.011693913	0.009042601	0.009044723	0.032	0.06	0.052	0.048333333	0	0.880797078	0.880797078	0.880797078	0.135335283	-0.504387751	N
0.822695035	5.804484224	0.008173651	0.018512399	0.010871636	0.011963101	0.169	0.29	0.2615	0.247666667	0	0.880797078	0.952574127	0.92414182	0.092561176	-0.547161859	N
0.778846154	5.676941813	0.008576899	0.016495498	0.012838231	0.012296846	0.109	0.167	0.119	0.131833333	0	0.880797078	0.880797078	0.880797078	0.135335283	-0.504387751	N
0.625	5.363783042	0.007500003	0.020246515	0.014107878	0.013411529	0.182	0.529	0.2435	0.319958333	0	0.880797078	0.952574127	0.952574127	0.071174122	-0.269894419	N
0.666666667	4.552139112	0.006837653	1	0.011846105	0.031409724	0.144	1	0.4685	0.427616667	0.001896633	0.5	0.98201379	0.880797078	0.1199175	-0.12091422	N
0.897338403	6.032485335	0.007193548	0.03005874	0.011200919	0.012072046	0.139	0.634	0.531	0.464375	0	0.880797078	0.880797078	0.880797078	0.135335283	-0.267342542	N
0.807881773	4.259418158	0.004274375	0.021999836	0.009137653	0.010441392	0.104	0.66	0.491	0.429939394	0.001003622	0.880797078	0.952574127	0.880797078	0.101634471	-0.122670207	N
0.779661017	5.291044977	0.006617093	0.009377278	0.008516385	0.008287604	0.171	0.701	0.5915	0.543666667	0.014492754	0.880797078	0.880797078	0.880797078	0.135335283	-0.504387751	N
0.876623377	2.917589867	0.006678196	0.023269327	0.012671963	0.013212013	0.153	0.635	0.49	0.418297619	0.000390409	0.880797078	0.952574127	0.952574127	0.070155691	-0.141547989	N
0.787356322	5.86344871	0.006365697	0.018937167	0.010996205	0.011861129	0.139	0.586	0.3855	0.351277778	0.003266639	0.880797078	0.952574127	0.880797078	0.097313854	-0.261015133	N
0.768115942	5.466173586	0.011336936	0.024475433	0.012724492	0.014386651	0.134	0.33	0.2655	0.256666667	0	0.880797078	0.952574127	0.952574127	0.07830314	-0.561419895	N
0.751724138	5.757205813	0.008208412	0.030092042	0.012331009	0.013999635	0.147	0.595	0.499	0.436722222	0.00067858	0.880797078	0.952574127	0.880797078	0.106819212	-0.261015133	N
0.697247706	5.315760075	0.007422095	0.024260302	0.013601547	0.01472372	0.15	0.695	0.494	0.450277778	0.011009174	0.880797078	0.880797078	0.880797078	0.135335283	-0.216166179	N
0.86013986	5.59133221	0.008037909	0.022029627	0.012907014	0.013476171	0.136	0.502	0.394	0.361375	0.003016023	0.880797078	0.952574127	0.952574127	0.067609613	-0.247864153	N
0.850746269	5.109201181	0.007752603	0.020809718	0.012055578	0.013098444	0.109	0.608	0.494	0.388375	0.00163332	0.880797078	0.952574127	0.952574127	0.085432158	-0.219348081	N
0.724550898	6.607328099	0.008018096	0.016426486	0.010875418	0.011705075	0.189	0.586	0.533	0.466333333	0	0.880797078	0.952574127	0.880797078	0.106819212	-0.532903823	N
0.770949721	3.46934906	0.008275257	0.016711134	0.011392024	0.011711533	0.189	0.364	0.3335	0.308333333	0	0.952574127	0.952574127	0.952574127	0.049787068	-0.589935966	N
0.791878173	5.760251167	0.003900728	0.008809909	0.005828677	0.005926799	0.05	0.604	0.356	0.311777778	0.003779924	0.880797078	0.952574127	0.880797078	0.116324569	-0.251509776	N
0.714953271	5.99539209	0.005157305	0.010074362	0.00708311	0.00735545	0.136	0.644	0.5175	0.466	0.014492754	0.880797078	0.880797078	0.880797078	0.135335283	-0.504387751	N
0.691011236	6.161238265	0.005575633	0.024475433	0.0123632	0.012391036	0.105	0.582	0.204	0.256883333	0.000526636	0.880797078	0.952574127	0.952574127	0.084006354	-0.137653606	N
0.882352941	5.908979359	0.004410088	0.012414658	0.007077082	0.007794478	0.124	0.474	0.387	0.348333333	0	0.880797078	0.952574127	0.952574127	0.07830314	-0.561419895	N
0.70984456	4.170141279	0.004843929	0.08937376	0.009258345	0.015932931	0.113	0.756	0.3855	0.4145	0.001335113	0.880797078	0.952574127	0.92414182	0.092561176	-0.309608626	N
0.84	5.381324305	0.007966926	0.025795297	0.013972815	0.014412477	0.151	0.648	0.5385	0.4782	0.002058218	0.880797078	0.952574127	0.880797078	0.103967604	-0.179623758	N
0.839805825	4.925945543	0.007209497	0.018515842	0.012505041	0.012527054	0.147	0.583	0.4915	0.436666667	0.002129082	0.731058579	0.880797078	0.880797078	0.199930883	-0.203247059	N
0.746835443	1.668021956	0.008240032	0.014757046	0.01132241	0.011658734	0.179	0.713	0.6235	0.546666667	0.006917423	0.731058579	0.880797078	0.880797078	0.174092643	-0.249464213	N
0.775	4.343170625	0.005644638	0.014764207	0.00923748	0.009614087	0.149	0.615	0.532	0.47	0	0.880797078	0.952574127	0.952574127	0.064045104	-0.575677931	N
0.727272727	5.152791085	0.009024579	1	0.013389292	0.095974951	0.157	1	0.5335	0.50625	0	0.5	0.952574127	0.880797078	0.178874605	-0.223295197	N
0.857819905	6.206360745	0.005157305	0.018247465	0.008941403	0.009051662	0.128	0.66	0.513	0.4685	0.009756098	0.880797078	0.880797078	0.880797078	0.135335283	-0.216166179	N
0.822429907	4.505916192	0.006837653	0.058448686	0.011195768	0.018424584	0.16	0.834	0.4775	0.498833333	0	0.880797078	0.880797078	0.880797078	0.135335283	-0.504387751	N
0.747058824	5.197016528	0.006850379	0.021397309	0.012445261	0.012043325	0.109	0.495	0.1695	0.270083333	0.002932551	0.880797078	0.952574127	0.952574127	0.064045104	-0.33025684	N
0.872340426	4.71960753	0.007107319	0.076436739	0.012009011	0.019420441	0.158	0.833	0.568	0.542333333	0.003093581	0.731058579	0.880797078	0.880797078	0.148254403	-0.254923539	N
0.82967033	5.314979646	0.006837653	0.076436739	0.012397249	0.017443283	0.144	0.834	0.5435	0.465111111	0.00279916	0.731058579	0.952574127	0.880797078	0.131680327	-0.186660192	N
0.918699187	4.531936898	0.006678196	0.034861447	0.012825554	0.013496187	0.109	0.635	0.4625	0.401631944	0.00043252	0.731058579	0.952574127	0.952574127	0.07872986	-0.113988336	N
0.72027972	4.777321105	0.006284324	0.01403875	0.009725532	0.009539105	0.118	0.536	0.318	0.307916667	0	0.880797078	0.952574127	0.880797078	0.11394823	-0.309608626	N
0.86440678	4.445168064	0.008156893	0.024546672	0.012651807	0.014082659	0.152	0.552	0.501	0.437333333	0.002098636	0.880797078	0.952574127	0.880797078	0.121077247	-0.518645787	N
0.853333333	3.384842383	0.008085429	0.796367846	0.012031319	0.14256897	0.39	0.728	0.595	0.589	0.02349486	0.731058579	0.880797078	0.880797078	0.174092643	-0.465630392	N
0.636363636	4.962562335	0.007422095	0.020976558	0.012848072	0.012831934	0.15	0.517	0.4735	0.413333333	0.003669725	0.880797078	0.880797078	0.880797078	0.135335283	-0.346357612	N
0.81042654	5.911272924	0.00655566	0.028268077	0.012917658	0.01365961	0.162	1	0.618	0.636277778	0.004853676	0.880797078	0.880797078	0.880797078	0.135335283	-0.216166179	N
0.840490798	5.718105756	0.007909435	0.801361771	0.012519688	0.107442378	0.406	0.769	0.5925	0.610166667	0.011550578	0.731058579	0.880797078	0.880797078	0.174092643	-0.307600252	N
0.694117647	7.165968916	0.00556638	0.013863654	0.008339503	0.008859291	0.164	0.332	0.306	0.2815	0	0.880797078	0.880797078	0.880797078	0.135335283	-0.504387751	N
0.84137931	5.711122862	0.00652649	0.028768181	0.012089649	0.013140476	0.117	0.619	0.4365	0.390233333	0.004591368	0.731058579	0.952574127	0.880797078	0.134331096	-0.175795906	N
0.803571429	2.696687954	0.003791623	0.008993749	0.006683267	0.006435763	0.145	0.563	0.4995	0.459666667	0.006431853	0.880797078	0.880797078	0.880797078	0.135335283	-0.504387751	N
0.607692308	4.701279967	0.008108366	0.015877927	0.014775213	0.013283452	0.122	0.319	0.286	0.2535	0	0.952574127	0.98201379	0.952574127	0.04454183	-0.595181205	N
0.723076923	6.39295183	0.013361577	0.030992211	0.021158127	0.021445049	0.147	0.825	0.741	0.656	0	0.952574127	0.952574127	0.952574127	0.049787068	-0.589935966	N
0.870967742	4.237719195	0.006143835	0.015653185	0.010255912	0.010712073	0.167	0.666	0.51	0.47825	0.002592913	0.880797078	0.880797078	0.880797078	0.135335283	-0.288221572	N
0.797979798	4.248967135	0.008208412	0.030092042	0.012331009	0.013999635	0.147	0.595	0.499	0.436722222	0.00067858	0.880797078	0.952574127	0.880797078	0.106819212	-0.261015133	N
0.874074074	6.024574761	0.005547866	0.028268077	0.012495603	0.013187247	0.143	1	0.582	0.62475	0.00330017	0.731058579	0.952574127	0.880797078	0.129913147	-0.140027565	N
0.85380117	3.104163726	0.006617093	0.009377278	0.008516385	0.008287604	0.171	0.701	0.5915	0.543666667	0.014492754	0.880797078	0.880797078	0.880797078	0.135335283	-0.504387751	N
0.849740933	5.937336222	0.008208412	0.030092042	0.012331009	0.013999635	0.147	0.595	0.499	0.436722222	0.00067858	0.880797078	0.952574127	0.880797078	0.106819212	-0.261015133	N
0.695652174	3.203029884	0.006862752	0.031243988	0.018017262	0.018629595	0.147	0.711	0.48	0.470277778	0	0.952574127	0.952574127	0.952574127	0.049787068	-0.431905827	N
0.692307692	4.879112439	0.004641954	1	0.009356815	0.03112549	0.104	1	0.4635	0.416833333	0.001274867	0.5	0.952574127	0.880797078	0.126113221	-0.115245276	N
0.664233577	4.156464542	0.006335591	0.016597821	0.010704085	0.010992684	0.063	0.574	0.137	0.266833333	0	0.952574127	0.98201379	0.98201379	0.023560877	-0.399995978	N
0.787671233	4.899643208	0.007146028	1	0.013863215	0.057864174	0.109	1	0.2455	0.346583333	0	0.5	0.952574127	0.880797078	0.15485614	-0.177634608	N
0.621428571	5.840990961	0.006174314	0.014561811	0.010835442	0.010511191	0.162	0.595	0.485	0.443583333	0.00729927	0.880797078	0.952574127	0.952574127	0.064045104	-0.359511751	N
0.649681529	6.365532125	0.004878816	0.010840415	0.007748937	0.007744894	0.13	0.447	0.307	0.291166667	0	0.952574127	0.952574127	0.952574127	0.049787068	-0.589935966	N
0.835106383	5.933234757	0.005575633	0.024475433	0.012210298	0.012328303	0.105	0.582	0.2445	0.277319444	0.000645271	0.880797078	0.952574127	0.952574127	0.081867649	-0.128243863	N
0.8	6.510750813	0.005094912	0.012809954	0.007608365	0.007973784	0.244	0.692	0.552	0.512	0	0.880797078	0.880797078	0.880797078	0.135335283	-0.504387751	N
0.61589404	5.980296875	0.007432331	0.015387831	0.011393648	0.011221702	0.191	1	0.614	0.6755	0.001130902	0.880797078	0.880797078	0.880797078	0.135335283	-0.288221572	N
0.834437086	5.761469388	0.00652649	0.017551547	0.011415839	0.011658006	0.147	0.537	0.4895	0.417388889	0.00524659	0.731058579	0.952574127	0.880797078	0.133996367	-0.207999738	N
0.796407186	4.571776699	0.007222395	0.019676616	0.012595061	0.012863251	0.145	0.658	0.4985	0.447541667	0.001933682	0.731058579	0.952574127	0.880797078	0.15421187	-0.126347985	N
0.850393701	5.311315355	0.007429683	0.022029627	0.01305612	0.013217185	0.136	0.502	0.4035	0.363966667	0.002651561	0.880797078	0.952574127	0.952574127	0.064045104	-0.229812044	N
0.753554502	2.834553541	0.005511642	0.009994522	0.008891022	0.008465006	0.161	0.701	0.555	0.5025	0.007326007	0.880797078	0.880797078	0.880797078	0.135335283	-0.346357612	N
0.738219895	7.131032525	0.00826823	0.013532164	0.010118676	0.010715493	0.237	0.705	0.576	0.526	0	0.880797078	0.880797078	0.880797078	0.135335283	-0.504387751	N
0.831858407	4.515709852	0.008840347	0.32379258	0.012862475	0.06494768	0.174	0.778	0.476	0.489	0.007326007	0.880797078	0.880797078	0.880797078	0.135335283	-0.504387751	N
0.791411043	6.041003614	0.008108366	0.015877927	0.014775213	0.013283452	0.122	0.319	0.286	0.2535	0	0.952574127	0.98201379	0.952574127	0.04454183	-0.595181205	N
0.907630522	6.094198284	0.005157305	0.022088595	0.008508785	0.010231861	0.136	0.644	0.507	0.4485	0.00729927	0.880797078	0.880797078	0.880797078	0.135335283	-0.288221572	N
0.856060606	5.379098726	0.005487287	0.028268077	0.014058793	0.014851841	0.143	0.697	0.4715	0.451833333	0.004030062	0.880797078	0.952574127	0.880797078	0.106819212	-0.151867731	N
0.887978142	6.076002944	0.009099827	0.020418087	0.015807406	0.015911536	0.2	0.382	0.218	0.250333333	0	0.880797078	0.880797078	0.880797078	0.135335283	-0.504387751	N
0.639344262	4.062181917	0.008208412	0.030092042	0.012331009	0.013999635	0.147	0.595	0.499	0.436722222	0.00067858	0.880797078	0.952574127	0.880797078	0.106819212	-0.261015133	N
0.835897436	5.522868277	0.006378381	1	0.012026993	0.032816206	0.128	1	0.5155	0.4889	0.003744298	0.5	0.952574127	0.880797078	0.167297563	-0.096182511	N
0.740963855	4.921393985	0.006678196	0.030092042	0.012216999	0.013065338	0.109	0.608	0.488	0.415486111	0.000962515	0.880797078	0.952574127	0.952574127	0.086620328	-0.129616742	N
0.854166667	5.107544173	0.005382598	0.026188407	0.011826419	0.012808405	0.121	0.59	0.477	0.420166667	0.000326691	0.880797078	0.952574127	0.880797078	0.101115997	-0.175631508	N
0.716049383	4.826273959	0.005812875	0.076436739	0.011564064	0.015892038	0.134	0.833	0.441	0.434	0.002939447	0.731058579	0.952574127	0.880797078	0.130766587	-0.183200898	N
0.888888889	4.860279429	0.006931854	0.076436739	0.010550907	0.018539877	0.158	0.842	0.545	0.523944444	0.004405286	0.731058579	0.880797078	0.880797078	0.148254403	-0.254923539	N
0.790849673	4.884960261	0.006931854	0.076436739	0.010550907	0.018539877	0.158	0.842	0.545	0.523944444	0.004405286	0.731058579	0.880797078	0.880797078	0.148254403	-0.254923539	N
0.683615819	5.604382415	0.007500003	0.030092042	0.012646986	0.013906215	0.147	0.595	0.496	0.434266667	0.000436745	0.880797078	0.952574127	0.880797078	0.101115997	-0.189554255	N
0.666666667	8.211525999	0.006376069	0.0252412	0.012507167	0.01308035	0.158	0.657	0.5195	0.469611111	0.004523181	0.880797078	0.880797078	0.880797078	0.135335283	-0.216166179	N
0.813953488	5.379713787	0.007107319	0.076436739	0.012009509	0.017574194	0.158	0.801	0.557	0.517277778	0.004893964	0.731058579	0.952574127	0.880797078	0.129243689	-0.248096013	N
0.849514563	5.600519055	0.005612096	0.016597821	0.009399822	0.010021356	0.063	0.574	0.356	0.320055556	0.006289308	0.880797078	0.98201379	0.98201379	0.060819013	-0.26817491	N
0.830845771	2.93964852	0.00605001	0.025856689	0.011135046	0.012903778	0.074	0.568	0.428	0.339083333	0.01754386	0.880797078	0.98201379	0.952574127	0.065190044	-0.289138048	N
0.796666667	2.684758783	0.011366997	0.013265414	0.012079541	0.012237317	0.09	0.645	0.556	0.430333333	0.02	0.952574127	0.993307149	0.98201379	0.024946885	-0.664324003	N
0.789473684	2.781189677	0.004718327	0.016610605	0.010605321	0.01002044	0.118	0.535	0.314	0.312133333	0	0.880797078	0.993307149	0.98201379	0.041538793	-0.274136136	N
0.829596413	3.399346614	0.009814507	0.014063599	0.010445704	0.01111781	0.073	0.513	0.4205	0.337	0	0.880797078	0.98201379	0.98201379	0.057322187	-0.473918561	N
0.863636364	2.526748835	0.005924906	0.011578449	0.007745044	0.008169032	0.072	0.527	0.4855	0.3575	0	0.880797078	0.98201379	0.952574127	0.067812663	-0.405292045	N
0.773913043	4.201175439	0.006352959	0.084237218	0.009535297	0.027154175	0.06	0.872	0.4335	0.429083333	0.013157895	0.880797078	0.98201379	0.952574127	0.072688482	-0.26372611	N
0.723404255	2.666293991	0.010211487	0.016164749	0.014370404	0.013582213	0.028	0.454	0.102	0.194666667	0	0.952574127	0.993307149	0.98201379	0.024946885	-0.664324003	N
0.583783784	3.464620595	0.007668868	0.010418539	0.009204204	0.009077704	0.057	0.529	0.155	0.2235	0	0.880797078	0.993307149	0.970687769	0.046379774	-0.426724935	N
0.780346821	2.999601401	0.008829737	0.012273345	0.009924401	0.010272275	0.061	0.455	0.1675	0.231666667	0	0.880797078	0.993307149	0.98201379	0.041134536	-0.490106212	N
0.804545455	1.695544014	0.010217737	0.013093759	0.0128656	0.012059032	0.089	0.503	0.452	0.348	0	0.880797078	0.98201379	0.98201379	0.057322187	-0.631948701	N
0.807174888	4.734264045	0.008245221	0.010287978	0.009015877	0.009183025	0.08	0.485	0.458	0.341	0	0.880797078	0.98201379	0.952574127	0.067812663	-0.621458224	N
0.982248521	2.711153224	0.005320761	0.006997847	0.00659055	0.006359515	0.072	0.502	0.477	0.35	0	0.880797078	0.98201379	0.952574127	0.067812663	-0.463428085	N
0.857843137	3.190473316	0.007237325	0.060671377	0.00818408	0.025364261	0.07	0.764	0.446	0.426666667	0.015822785	0.880797078	0.952574127	0.952574127	0.07830314	-0.610967748	N
0.837837838	3.696385069	0.008897219	0.012704585	0.011202878	0.010934894	0.062	0.391	0.117	0.19	0	0.880797078	0.98201379	0.98201379	0.057322187	-0.631948701	N
0.830917874	3.032370202	0.007237325	0.060671377	0.009627417	0.018040487	0.07	0.764	0.356	0.343833333	0.015822785	0.880797078	0.98201379	0.952574127	0.067812663	-0.405292045	N
0.643636364	2.863332037	0.00594224	0.015153719	0.008669325	0.009789151	0.055	1	0.243	0.357866667	0.00729927	0.880797078	0.98201379	0.98201379	0.03450933	-0.283623509	N
0.680851064	2.591862197	0.007359406	0.011619469	0.009809305	0.009573334	0.067	0.478	0.4565	0.338333333	0	0.880797078	0.98201379	0.970687769	0.062567425	-0.410537283	N
0.7239819	2.022581275	0.0062443	0.012895307	0.00950067	0.009489268	0.067	0.484	0.345	0.289333333	0.007462687	0.880797078	0.98201379	0.952574127	0.063616473	-0.2763666	N
0.78238342	1.385803587	0.005835209	0.007154015	0.006690542	0.006559922	0.058	0.346	0.279	0.227666667	0	0.880797078	0.98201379	0.98201379	0.057322187	-0.631948701	N
0.835497835	4.563561885	0.006691953	0.012735453	0.009813526	0.00931297	0.066	0.537	0.38	0.2844	0.007092199	0.880797078	0.993307149	0.98201379	0.050847127	-0.275448232	N
0.637130802	2.937955315	0.010383645	0.013470698	0.012903142	0.012252495	0.048	0.205	0.172	0.141666667	0	0.880797078	0.98201379	0.98201379	0.057322187	-0.631948701	N
0.788235294	5.557754481	0.008893787	0.012895307	0.010361047	0.010716714	0.071	0.359	0.353	0.261	0	0.880797078	0.98201379	0.98201379	0.057322187	-0.631948701	N
0.692307692	2.748766806	0.008893787	0.012895307	0.010361047	0.010716714	0.071	0.359	0.353	0.261	0	0.880797078	0.98201379	0.98201379	0.057322187	-0.631948701	N
0.718592965	2.548475033	0.004827273	0.015889058	0.011284937	0.010866664	0.056	1	0.3455	0.339729167	0.001084599	0.880797078	0.993307149	0.98201379	0.039604942	-0.216525397	N
0.802030457	2.461930065	0.005563702	0.007801581	0.007453816	0.0069397	0.065	0.271	0.259	0.198333333	0	0.952574127	0.993307149	0.98201379	0.024946885	-0.664324003	N
0.883248731	2.189108361	0.005835209	0.007154015	0.006690542	0.006559922	0.058	0.346	0.279	0.227666667	0	0.880797078	0.98201379	0.98201379	0.057322187	-0.631948701	N
0.730941704	1.638051146	0.007218973	0.008137501	0.007820994	0.007725822	0.139	0.475	0.412	0.342	0.015748031	0.952574127	0.98201379	0.98201379	0.028806115	-0.660464772	N
0.745689655	6.009250147	0.004157984	0.006048394	0.0058015	0.005335959	0.066	0.701	0.401	0.389333333	0.005934718	0.880797078	0.98201379	0.98201379	0.057322187	-0.631948701	N
0.585585586	1.622901175	0.00673735	0.011523739	0.007716828	0.008511577	0.189	0.538	0.353	0.372833333	0	0.880797078	0.98201379	0.98201379	0.043064151	-0.408653504	N
0.681081081	2.882628418	0.007657707	0.014794638	0.011050335	0.010957952	0.062	0.633	0.39	0.357515152	0.00162206	0.880797078	0.993307149	0.98201379	0.042370807	-0.228852862	N
0.655660377	2.860391791	0.008930381	0.012432594	0.00999081	0.010136174	0.062	0.387	0.25	0.222916667	0	0.880797078	0.993307149	0.98201379	0.032075903	-0.32225219	N
0.485	2.044661175	0.007171198	0.016048974	0.010355144	0.01069896	0.04	0.471	0.329	0.255619048	0.000759301	0.880797078	0.98201379	0.98201379	0.057744381	-0.301922224	N
0.70661157	5.502545602	0.007237325	0.060671377	0.008714794	0.024622973	0.07	0.85	0.4845	0.4545	0.010973937	0.880797078	0.98201379	0.952574127	0.067812663	-0.463428085	N
0.813559322	2.070741303	0.00844016	0.015276852	0.011585287	0.011635052	0.044	0.635	0.4165	0.347972222	0	0.880797078	0.993307149	0.98201379	0.037788907	-0.247050703	N
0.687022901	4.846017667	0.008744604	0.00927218	0.008846825	0.008954536	0.069	0.49	0.443	0.334	0	0.880797078	0.98201379	0.952574127	0.067812663	-0.621458224	N
0.670731707	1.564784594	0.009697869	0.015068733	0.012338467	0.012325284	0.078	0.536	0.37	0.338	0	0.880797078	0.98201379	0.98201379	0.060819013	-0.391906783	N
0.883495146	2.449947467	0.008829737	0.012273345	0.009924401	0.010272275	0.061	0.455	0.1675	0.231666667	0	0.880797078	0.993307149	0.98201379	0.041134536	-0.490106212	N
0.753488372	1.793682507	0.007093018	0.008310413	0.007910429	0.007771286	0.067	0.345	0.338	0.25	0	0.880797078	0.98201379	0.952574127	0.067812663	-0.621458224	N
0.562189055	2.308266506	0.007955393	0.0123713	0.010355144	0.010076074	0.077	0.446	0.263	0.248933333	0	0.880797078	0.98201379	0.952574127	0.067812663	-0.383904991	N
0.751724138	1.464786626	0.009697869	0.015068733	0.012338467	0.012325284	0.078	0.536	0.37	0.338	0	0.880797078	0.98201379	0.98201379	0.060819013	-0.391906783	N
0.788602941	2.158656785	0.007248711	0.017395917	0.011439895	0.011599462	0.069	0.586	0.4245	0.3605	0.002289639	0.880797078	0.993307149	0.98201379	0.053920996	-0.223045744	N
0.870292887	2.280251127	0.005835209	0.01345968	0.008740781	0.009137856	0.058	0.575	0.326	0.2854	0	0.880797078	0.993307149	0.98201379	0.039440698	-0.280010803	N
0.74789916	1.898642059	0.009697869	0.017571745	0.014310526	0.013918868	0.078	0.546	0.441	0.355	0	0.880797078	0.98201379	0.952574127	0.064315838	-0.362571717	N
0.855737705	2.297041058	0.006981686	0.025162119	0.010945097	0.012310315	0.061	0.673	0.424	0.326566667	0.002212389	0.880797078	0.993307149	0.952574127	0.056369566	-0.223781493	N
0.708333333	1.355189865	0.007035564	0.015068733	0.010918989	0.011249668	0.052	0.687	0.37	0.31047619	0.005333333	0.880797078	0.98201379	0.98201379	0.057744381	-0.259972221	N
0.778846154	2.125701549	0.007093018	0.01225087	0.009551973	0.009538459	0.067	0.484	0.3415	0.295333333	0	0.880797078	0.98201379	0.952574127	0.067812663	-0.405292045	N
0.684210526	2.298482766	0.004531692	0.060671377	0.007237325	0.011998637	0	0	0	0	0.015151515	0.880797078	0.993307149	0.970687769	0.042913506	-0.260568611	N
0.738197425	2.719165816	0.00721719	0.010569729	0.008400008	0.008616976	0.044	0.512	0.2495	0.271666667	0.02	0.880797078	0.98201379	0.970687769	0.062567425	-0.410537283	N
0.639593909	2.185475112	0.007352199	0.016626343	0.012188754	0.012538701	0.081	0.794	0.397	0.352777778	0	0.880797078	0.993307149	0.98201379	0.050027245	-0.332011356	N
0.823770492	3.074364305	0.010938091	0.016694095	0.015068953	0.014763375	0	0	0	0	0	0.880797078	0.98201379	0.970687769	0.062567425	-0.410537283	N
0.710900474	2.958160538	0.010105628	0.015885784	0.011978837	0.012789988	0.048	0.499	0.22	0.217111111	0	0.880797078	0.98201379	0.98201379	0.057322187	-0.343727129	N
0.727272727	4.690496904	0.006285764	0.0123713	0.009580928	0.009432533	0.077	0.506	0.263	0.262111111	0	0.880797078	0.98201379	0.98201379	0.057322187	-0.631948701	N
0.788793103	2.586231734	0.004868632	0.012177233	0.007440397	0.007899393	0.027	0.477	0.2945	0.2865	0	0.880797078	0.993307149	0.98201379	0.059808904	-0.239232762	N
0.537037037	1.811311205	0.004531692	0.014615321	0.011476595	0.010515625	0.046	0.635	0.442	0.343857143	0	0.880797078	0.993307149	0.98201379	0.043526154	-0.286505192	N
0.719745223	1.682218886	0.00556711	0.008560522	0.007293202	0.007407233	0.078	0.491	0.398	0.313333333	0	0.880797078	0.98201379	0.952574127	0.064315838	-0.414248197	N
0.699186992	2.035838905	0.007523592	0.018032944	0.013385598	0.01255113	0.051	0.388	0.308	0.226	0	0.880797078	0.98201379	0.98201379	0.043064151	-0.408653504	N
0.721189591	1.54364746	0.005924906	0.006732474	0.006481496	0.006379625	0.072	0.493	0.488	0.351	0	0.880797078	0.98201379	0.952574127	0.067812663	-0.621458224	N
0.797619048	2.469752813	0.006723054	0.009916485	0.007650199	0.007893004	0.044	0.43	0.2495	0.244833333	0	0.880797078	0.98201379	0.98201379	0.057322187	-0.415782522	N
0.764492754	2.057866049	0.008988281	0.013574195	0.011615368	0.011256774	0.081	0.635	0.442	0.376111111	0	0.952574127	0.993307149	0.98201379	0.026233295	-0.4264925	N
0.751937984	2.966586598	0.006285764	0.023718142	0.010868241	0.011784693	0.078	0.582	0.383	0.342619048	0	0.880797078	0.993307149	0.98201379	0.038426012	-0.257741846	N
0.657407407	3.323516721	0.00752755	0.013418403	0.008879726	0.009353789	0.069	0.54	0.33	0.289555556	0	0.880797078	0.993307149	0.98201379	0.035738652	-0.333297766	N
0.755102041	2.100729461	0.007573863	0.019294461	0.011546103	0.01151708	0.069	0.597	0.3875	0.338055556	0	0.880797078	0.98201379	0.98201379	0.055815163	-0.290047747	N
0.672985782	4.583227909	0.006285764	0.016020978	0.00937453	0.010259338	0.094	0.506	0.3325	0.312333333	0	0.880797078	0.98201379	0.98201379	0.043064151	-0.408653504	N
0.831818182	1.862544289	0.008759492	0.017395917	0.011885023	0.012121847	0.069	0.635	0.442	0.368791667	0.001081666	0.880797078	0.993307149	0.98201379	0.041157454	-0.26869291	N
0.700598802	2.327875348	0.004361154	0.021225739	0.008072017	0.01001076	0.029	0.571	0.3	0.285333333	0.001612903	0.880797078	0.993307149	0.98201379	0.048988578	-0.216145989	N
0.699481865	2.309842099	0.006487223	0.023347109	0.016028146	0.015592905	0.073	0.472	0.377	0.315333333	0	0.880797078	0.98201379	0.98201379	0.060819013	-0.321219589	N
0.851351351	3.630228694	0.011052316	0.01192839	0.011465488	0.011482065	0.12	0.418	0.219	0.252333333	0	0.952574127	0.98201379	0.98201379	0.028806115	-0.660464772	N
0.613953488	1.254230846	0.007201169	0.016073667	0.01173388	0.011845364	0.035	0.465	0.172	0.202666667	0	0.880797078	0.98201379	0.98201379	0.057322187	-0.343727129	N
0.944444444	1.593236637	0.009697869	0.015068733	0.012338467	0.012325284	0.078	0.536	0.37	0.338	0	0.880797078	0.98201379	0.98201379	0.060819013	-0.391906783	N
0.644670051	10.81535819	0.00938974	0.016610605	0.011385424	0.01201295	0.121	0.519	0.2265	0.255666667	0	0.880797078	0.98201379	0.98201379	0.057322187	-0.631948701	N
0.78	4.007427475	0.008984482	0.011655565	0.010466705	0.010368917	0.068	0.391	0.317	0.258666667	0	0.880797078	0.98201379	0.98201379	0.057322187	-0.631948701	N
0.816513761	1.596008259	0.009697869	0.015068733	0.012338467	0.012325284	0.078	0.536	0.37	0.338	0	0.880797078	0.98201379	0.98201379	0.060819013	-0.391906783	N
0.657004831	2.554242856	0.010093425	0.012542504	0.01232395	0.011653293	0.065	0.364	0.235	0.221333333	0	0.98201379	0.98201379	0.98201379	0.018315639	-0.670955249	N
0.745454545	2.310371883	0.007673494	1	0.01060423	0.126410424	0.082	1	0.399	0.433166667	0.066666667	0.5	0.98201379	0.952574127	0.173391878	-0.192147715	N
0.72392638	2.885327638	0.006227497	0.011919966	0.00908866	0.009195155	0.074	0.551	0.408	0.353222222	0	0.880797078	0.98201379	0.952574127	0.064315838	-0.388409957	N
0.717391304	1.945233825	0.008759492	0.01492221	0.011379502	0.01139604	0.069	0.565	0.434	0.349	0	0.880797078	0.98201379	0.952574127	0.054810481	-0.362571717	N
0.788679245	2.744819441	0.005788769	0.015068733	0.011481168	0.011207129	0.078	0.536	0.37	0.32925	0	0.880797078	0.98201379	0.98201379	0.059944806	-0.334144833	N
0.705627706	4.058235267	0.005788769	0.008908647	0.008860573	0.007852663	0.212	0.372	0.325	0.303	0	0.880797078	0.98201379	0.98201379	0.057322187	-0.631948701	N
0.72972973	1.839920636	0.007093018	0.008310413	0.007910429	0.007771286	0.067	0.345	0.338	0.25	0	0.880797078	0.98201379	0.952574127	0.067812663	-0.621458224	N
0.86	2.412448671	0.00721719	0.017478976	0.009517672	0.010808549	0.044	0.292	0.2255	0.191333333	0	0.880797078	0.98201379	0.98201379	0.043064151	-0.408653504	N
0.8	1.396217972	0.005835209	0.013330252	0.00803459	0.009189136	0.058	0.54	0.3125	0.295166667	0	0.880797078	0.993307149	0.98201379	0.041134536	-0.431970173	N
0.691489362	3.832193313	0.011049759	0.013537202	0.013011868	0.012532943	0.073	0.571	0.419	0.354333333	0	0.952574127	0.98201379	0.98201379	0.028806115	-0.660464772	N
0.801619433	2.648433166	0.007657707	0.016431432	0.011799359	0.011585486	0.053	0.589	0.372	0.361	0	0.880797078	0.993307149	0.98201379	0.039440698	-0.291475641	N
0.775	2.27379736	0.008284522	0.016166227	0.011476595	0.011450279	0.062	0.633	0.374	0.330807018	0.000577478	0.880797078	0.993307149	0.98201379	0.039254815	-0.213340861	N
0.885572139	5.647808049	0.008167	0.021636672	0.009629376	0.012507956	0.077	0.536	0.3745	0.3075	0	0.880797078	0.997527377	0.98201379	0.038495055	-0.405354743	N
0.622119816	3.579115396	0.010030256	0.014861867	0.012820701	0.012520081	0.066	0.571	0.418	0.329166667	0.00407332	0.880797078	0.98201379	0.970687769	0.048309389	-0.424795319	N
0.821818182	3.603770854	0.006693236	0.117178712	0.010513393	0.027751024	0.064	0.908	0.46	0.453266667	0.006904715	0.880797078	0.98201379	0.98201379	0.061518378	-0.247955154	N
0.825203252	2.312426872	0.009326258	0.020914017	0.011743099	0.012848734	0.062	0.595	0.229	0.303333333	0	0.880797078	0.98201379	0.98201379	0.057322187	-0.369565368	N
0.706382979	2.545203706	0.010572438	0.01331222	0.01322572	0.012370126	0.066	0.237	0.196	0.166333333	0	0.952574127	0.98201379	0.98201379	0.028806115	-0.660464772	N
0.799342105	2.155145294	0.007523592	0.015244967	0.011500062	0.011546916	0.063	0.399	0.3455	0.2675	0	0.952574127	0.98201379	0.98201379	0.028806115	-0.415043682	N
0.781512605	3.469244541	0.008945286	0.017466154	0.013002694	0.013273399	0.079	0.589	0.394	0.394222222	0	0.880797078	0.98201379	0.98201379	0.057322187	-0.415782522	N
0.766666667	2.647910606	0.005609163	0.019294461	0.010765854	0.011029987	0.039	0.597	0.376	0.301518519	0	0.880797078	0.98201379	0.98201379	0.057744381	-0.274701465	N
0.763837638	2.19644713	0.007093018	0.0123382	0.010979716	0.010446121	0	0	0	0	0	0.880797078	0.993307149	0.952574127	0.053524071	-0.338019888	N
0.731225296	2.445014926	0.008744604	0.00927218	0.008846825	0.008954536	0.069	0.49	0.443	0.334	0	0.880797078	0.98201379	0.952574127	0.067812663	-0.621458224	N
[truncated: 43,469 more rows]
