# Supplementary material for: Discovery and Validation of Traditional Chinese and Western Medicine Combination Antirheumatoid Arthritis Drugs Based on Machine Learning (Random Forest Model)
Source: Biomed Res Int. 2023 Feb 15;2023:6086388. doi: 10.1155/2023/6086388 (PMC9950790; doi:10.1155/2023/6086388)
Supplement: Supplementary 3 — Drug combination prediction dataset of integrated Western and TCM drugs. [file 6086388.f3.txt]

Table S3 Drug combination prediction data set of integrated Western and TCM drugs
Comb	SFP	SADME	SSeqmin	SSeqmax	SSeqmed	SSeqmean	SGOmin	SGOmax	SGOmed	SGOmean	SPathway	SPPImin	SPPImax	SPPImed	SPPImean	Snp
Comb001	0.684210526	1.092201159	0.005825577	1	0.011765077	0.043170648	0	0	0	0	0.00262092	0.5	0.98201379	0.952574127	0.101607076	-0.124088302
Comb002	0.808383234	3.916039514	0.007548293	1	0.013770274	0.027594608	0	0	0	0	0.001380513	0.5	0.98201379	0.952574127	0.091737099	-0.124771032
Comb003	0.681034483	2.20403053	0.004530353	0.029056063	0.011821603	0.012048895	0	0	0	0	0.000662857	0.880797078	0.98201379	0.952574127	0.080288661	-0.089583225
Comb004	0.773722628	2.539568472	0.005825577	1	0.010976171	0.066419292	0	0	0	0	0.002518786	0.5	0.98201379	0.952574127	0.11401844	-0.284749111
Comb005	0.817610063	3.625237307	0.005148695	0.017357915	0.009473453	0.009791123	0	0	0	0	0.000273778	0.880797078	0.98201379	0.952574127	0.054555829	-0.195009575
Comb006	0.710526316	3.380771288	0.005825577	1	0.014013808	0.028304068	0	0	0	0	0.001466453	0.5	0.98201379	0.952574127	0.080953618	-0.066850179
Comb007	0.770992366	2.237109666	0.005378698	1	0.010424273	0.022549841	0	0	0	0	0.00152919	0.5	0.952574127	0.880797078	0.104958133	-0.163617985
Comb008	0.848039216	6.242460199	0.007103167	0.024962852	0.015785879	0.015449998	0	0	0	0	0	0.880797078	0.952574127	0.952574127	0.090102894	-0.204311464
Comb009	0.641025641	1.314148336	0.005825577	1	0.010976171	0.066419292	0	0	0	0	0.002518786	0.5	0.98201379	0.952574127	0.11401844	-0.284749111
Comb010	0.820224719	4.830133984	0.005303718	1	0.01188739	0.027051612	0	0	0	0	0.000575434	0.5	0.98201379	0.952574127	0.094914089	-0.062036683
Comb011	0.743589744	4.314189399	0.005282267	1	0.014661301	0.044182855	0.087	1	0.483	0.45625	0.002571472	0.5	0.98201379	0.952574127	0.108510209	-0.142924278
Comb012	0.732394366	3.155446074	0.006667355	1	0.017732805	0.035572807	0	0	0	0	0.002475514	0.5	0.98201379	0.92414182	0.106315648	-0.135931594
Comb013	0.734463277	3.457779678	0.005560159	0.029692919	0.013322629	0.014223377	0.072	1	0.4325	0.520602041	0.000628424	0.880797078	0.98201379	0.952574127	0.084844904	-0.110766092
Comb014	0.693989071	3.731346217	0.006667355	1	0.014384838	0.071536876	0.114	1	0.483	0.405785714	0.002922704	0.5	0.98201379	0.952574127	0.124512641	-0.29999402
Comb015	0.817351598	3.734090501	0.005075731	0.021863861	0.012061678	0.01175266	0.035	1	0.3755	0.361119048	0.003163274	0.880797078	0.98201379	0.952574127	0.055475461	-0.219829052
Comb016	0.62371134	3.361603363	0.006667355	1	0.017685269	0.030507429	0.063	1	0.232	0.318349206	0.001482277	0.5	0.98201379	0.952574127	0.092278316	-0.081264592
Comb017	0.759358289	3.28917991	0.004802855	0.034293642	0.013251423	0.014308303	0.087	1	0.444	0.40097619	0.002531646	0.731058579	0.952574127	0.880797078	0.116429702	-0.177885526
Comb018	0.730290456	2.421075224	0.006901596	0.035498769	0.017761667	0.017672166	0.072	0.657	0.2975	0.310142857	0	0.880797078	0.952574127	0.880797078	0.104782349	-0.215371118
Comb019	0.647058824	3.682511848	0.006667355	1	0.014384838	0.071536876	0.114	1	0.483	0.405785714	0.002922704	0.5	0.98201379	0.952574127	0.124512641	-0.29999402
Comb020	0.699074074	2.345350406	0.005743517	1	0.01516699	0.027758064	0.072	1	0.4645	0.417342857	0.001329552	0.5	0.98201379	0.880797078	0.107709727	-0.074980155
Comb021	0.891304348	4.911368635	0.007006531	1	0.015226519	0.042903043	0.147	1	0.4945	0.443566667	0.001271627	0.5	0.98201379	0.880797078	0.118853369	-0.136853473
Comb022	0.901185771	4.54445265	0.008524419	1	0.017421784	0.034586493	0	0	0	0	0.001503779	0.5	0.98201379	0.880797078	0.119352974	-0.127166621
Comb023	0.828282828	4.012574086	0.005717158	0.029798446	0.014058164	0.015081013	0.136	1	0.45	0.531628571	0.000355758	0.880797078	0.98201379	0.952574127	0.086796728	-0.113086622
Comb024	0.882352941	4.60587303	0.008524419	1	0.014709672	0.067437781	0.147	1	0.4685	0.383166667	0.001502065	0.5	0.98201379	0.880797078	0.141540444	-0.287238571
Comb025	0.802690583	4.200938234	0.006122632	0.021863861	0.011931285	0.012182128	0.153	0.583	0.373	0.354133333	0.001699896	0.880797078	0.98201379	0.952574127	0.06770437	-0.211872498
Comb026	0.834745763	4.391244514	0.008495375	1	0.016888605	0.030333031	0.128	1	0.227	0.30562963	0.000871476	0.5	0.98201379	0.952574127	0.099872335	-0.077942927
Comb027	0.904109589	4.021151018	0.005926165	0.023281723	0.013641579	0.014174867	0.128	0.807	0.434	0.389822222	0.001467317	0.880797078	0.952574127	0.880797078	0.110621354	-0.187966228
Comb028	0.810606061	5.62757401	0.008431731	0.035498769	0.018158551	0.018146316	0.143	0.442	0.287	0.295688889	9.03642E-05	0.731058579	0.952574127	0.880797078	0.11198686	-0.212438962
Comb029	0.844660194	4.100350795	0.008524419	1	0.014709672	0.067437781	0.147	1	0.4685	0.383166667	0.001502065	0.5	0.98201379	0.880797078	0.141540444	-0.287238571
Comb030	0.884169884	5.108556035	0.005926879	1	0.015262872	0.026889534	0.065	1	0.4655	0.400233333	0.000879777	0.5	0.98201379	0.880797078	0.11999384	-0.066968396
Comb031	0.891666667	3.901551942	0.008227451	1	0.01545432	0.096629139	0.13	1	0.404	0.428325	0.006050013	0.5	0.98201379	0.952574127	0.123880667	-0.126170939
Comb032	0.92746114	5.00991562	0.011312147	1	0.017749791	0.057439387	0	0	0	0	0.00363532	0.5	0.98201379	0.952574127	0.093402642	-0.147461717
Comb033	0.85	3.643114267	0.007691998	1	0.013545121	0.035359588	0.147	1	0.359	0.438985714	0.000837872	0.5	0.98201379	0.952574127	0.079025794	-0.11520232
Comb034	0.9	4.025076441	0.011076936	1	0.014087049	0.174117924	0.144	1	0.4175	0.4711	0.006964019	0.5	0.98201379	0.952574127	0.191965733	-0.231158046
Comb035	0.840236686	3.095330539	0.0082977	0.017859762	0.011636862	0.011569373	0.067	0.474	0.2855	0.2716	0.003676471	0.952574127	0.98201379	0.952574127	0.038130983	-0.235790649
Comb036	0.866666667	4.327948059	0.010644082	1	0.016739164	0.055442045	0.11	1	0.2645	0.333133333	0.004157012	0.5	0.98201379	0.952574127	0.089654323	-0.082505703
Comb037	0.916666667	3.753153914	0.008214812	0.025693206	0.012860093	0.013631758	0.115	0.531	0.319	0.3132	0.001776199	0.880797078	0.952574127	0.952574127	0.071966235	-0.220966111
Comb038	0.842857143	6.357592625	0.010552788	0.024432141	0.017180776	0.017364728	0.112	0.434	0.2565	0.2557	0.000678273	0.880797078	0.952574127	0.952574127	0.075134688	-0.243635899
Comb039	0.832167832	3.433849797	0.011076936	1	0.014087049	0.174117924	0.144	1	0.4175	0.4711	0.006964019	0.5	0.98201379	0.952574127	0.191965733	-0.231158046
Comb040	0.915422886	5.723179538	0.008962739	1	0.014117152	0.05683833	0.074	1	0.3575	0.36191	0.002072939	0.5	0.98201379	0.952574127	0.104742806	-0.076564194
Comb041	0.926605505	4.933440394	0.00872387	1	0.013564975	0.07135273	0.076	1	0.399	0.417107143	0.011644155	0.5	0.98201379	0.952574127	0.113098801	-0.151694656
Comb042	0.950549451	7.058092309	0.009305658	1	0.014589598	0.050889554	0	0	0	0	0.006960557	0.5	0.98201379	0.952574127	0.106724966	-0.148881244
Comb043	0.821138211	3.831132131	0.007522882	0.02386433	0.013268434	0.013220402	0.08	1	0.339	0.422040816	0.000725821	0.880797078	0.98201379	0.952574127	0.070375771	-0.138594194
Comb044	0.961038961	6.734114549	0.009305658	1	0.013060305	0.127039252	0.147	1	0.479	0.472071429	0.013785181	0.5	0.98201379	0.952574127	0.156464105	-0.281401525
Comb045	0.875	6.55100492	0.006510149	0.012423001	0.010583812	0.010275418	0.057	0.633	0.247	0.259428571	0.002996255	0.880797078	0.98201379	0.952574127	0.046367595	-0.242295888
Comb046	0.913294798	6.98221792	0.009305658	1	0.014675648	0.048234939	0.08	1	0.231	0.318571429	0.007083825	0.5	0.98201379	0.952574127	0.087649057	-0.09925282
Comb047	0.959183673	6.050810807	0.008214812	0.019959075	0.011503194	0.012277535	0.085	0.573	0.347	0.330095238	0.001230012	0.880797078	0.952574127	0.952574127	0.090524314	-0.217149884
Comb048	0.903381643	6.443754555	0.009340693	0.02257532	0.016438411	0.016622473	0.087	0.405	0.263	0.266047619	0.000783085	0.880797078	0.952574127	0.952574127	0.090524314	-0.242988124
Comb049	0.897810219	5.767650956	0.009305658	1	0.013060305	0.127039252	0.147	1	0.479	0.472071429	0.013785181	0.5	0.98201379	0.952574127	0.156464105	-0.281401525
Comb050	0.936842105	6.985775003	0.008962739	1	0.013392057	0.037493994	0.083	1	0.354	0.347842857	0.002675254	0.5	0.98201379	0.952574127	0.094538981	-0.101509871
Comb051	0.689655172	1.932035873	0.005282267	1	0.013585957	0.033408932	0.147	1	0.459	0.430428571	0.000725487	0.5	0.98201379	0.880797078	0.113609381	-0.12076057
Comb052	0.77173913	2.852541732	0.006585484	1	0.01498207	0.025924828	0	0	0	0	0.000883926	0.5	0.98201379	0.880797078	0.108828327	-0.116354378
Comb053	0.741258741	2.498125407	0.004788674	0.029900785	0.012441559	0.012980975	0.123	1	0.435	0.504544218	0.000251594	0.731058579	0.98201379	0.952574127	0.088515517	-0.090030943
Comb054	0.717105263	1.759903487	0.006585484	1	0.012613347	0.051030785	0.147	1	0.4535	0.397130952	0.000857996	0.5	0.98201379	0.880797078	0.124865734	-0.282576391
Comb055	0.812154696	3.346735378	0.004232031	0.023073461	0.010118621	0.010570624	0.067	0.685	0.338	0.333928571	0.000871317	0.880797078	0.98201379	0.952574127	0.066229685	-0.192010293
Comb056	0.664670659	2.4875643	0.006585484	1	0.014813356	0.025130914	0.11	1	0.246	0.310542328	0.000521348	0.5	0.98201379	0.952574127	0.098553278	-0.057925093
Comb057	0.794871795	1.78750727	0.004551602	1	0.011654507	0.021157162	0.128	1	0.4255	0.386095238	0.000919275	0.5	0.952574127	0.880797078	0.122125486	-0.155125206
Comb058	0.769953052	5.133017614	0.006499787	0.033779639	0.015498817	0.015870493	0.143	0.53	0.289	0.303650794	9.19279E-05	0.731058579	0.952574127	0.880797078	0.111189343	-0.191899589
Comb059	0.690140845	1.270934627	0.006585484	1	0.012613347	0.051030785	0.147	1	0.4535	0.397130952	0.000857996	0.5	0.98201379	0.880797078	0.124865734	-0.282576391
Comb060	0.683333333	3.498562873	0.00569294	1	0.013198479	0.022394722	0.067	1	0.4325	0.389961905	0.000478663	0.5	0.98201379	0.880797078	0.11426417	-0.051361175
Comb061	0.661290323	3.072012315	0.006470153	1	0.013438409	0.038541081	0.05	1	0.462	0.420810606	0.000893028	0.5	0.98201379	0.880797078	0.12923871	-0.118275396
Comb062	0.781725888	2.008445412	0.007614076	1	0.015705344	0.031467619	0	0	0	0	0.001062067	0.5	0.98201379	0.880797078	0.114516495	-0.123810365
Comb063	0.697986577	3.194250527	0.005913904	0.029798446	0.012061541	0.01308772	0.047	1	0.435	0.495060606	0.000318	0.731058579	0.98201379	0.880797078	0.097328327	-0.094362288
Comb064	0.709876543	1.922874455	0.006470153	1	0.012063051	0.06130204	0.05	1	0.409	0.384090909	0.001054197	0.5	0.98201379	0.880797078	0.142749363	-0.277836916
Comb065	0.819587629	3.390349148	0.006060273	0.019061056	0.009649946	0.010397405	0.035	0.688	0.316	0.310464646	0.000954316	0.731058579	0.98201379	0.952574127	0.080686193	-0.190697939
Comb066	0.653409091	2.113627714	0.006470153	1	0.014989103	0.028436715	0.037	1	0.22	0.299047138	0.000611053	0.5	0.98201379	0.880797078	0.104389255	-0.065233272
Comb067	0.760736196	1.785058074	0.005489464	0.115232271	0.012476371	0.01629762	0.037	0.829	0.44	0.385767677	0.001078912	0.731058579	0.952574127	0.880797078	0.121643115	-0.168751732
Comb068	0.756756757	4.504325394	0.007543955	0.034152158	0.015595909	0.016149563	0.05	0.543	0.282	0.287040404	7.50952E-05	0.731058579	0.952574127	0.880797078	0.123127922	-0.193105164
Comb069	0.675496689	1.991283593	0.006470153	1	0.012063051	0.06130204	0.05	1	0.409	0.384090909	0.001054197	0.5	0.98201379	0.880797078	0.142749363	-0.277836916
Comb070	0.692708333	2.556497752	0.006470153	1	0.013806323	0.02566666	0.028	1	0.421	0.382412121	0.000553417	0.5	0.98201379	0.880797078	0.123635343	-0.055134158
Comb071	0.753333333	4.153466855	0.009090024	1	0.013580446	0.080841599	0.147	1	0.4915	0.473041667	0.003954802	0.5	0.952574127	0.880797078	0.152536248	-0.148955456
Comb072	0.714285714	2.315442938	0.00913968	1	0.015705344	0.056099771	0	0	0	0	0.003417085	0.5	0.952574127	0.880797078	0.152536248	-0.13976821
Comb073	0.647798742	4.2135094	0.007691998	0.021056059	0.01242391	0.012931244	0.149	1	0.4435	0.517690476	0.000550136	0.880797078	0.98201379	0.880797078	0.101996167	-0.143672045
Comb074	0.65497076	1.638752955	0.00913968	1	0.012776247	0.146224167	0.147	1	0.499	0.464666667	0.004761352	0.5	0.952574127	0.880797078	0.205382302	-0.269181575
Comb075	0.743718593	1.184527535	0.00813241	0.013701314	0.009758501	0.010471711	0.174	0.526	0.3525	0.347888889	0.003635262	0.880797078	0.98201379	0.952574127	0.076554727	-0.248807003
Comb076	0.582417582	1.304584676	0.00913968	1	0.015825642	0.045096183	0.128	1	0.256	0.328907407	0.002481863	0.5	0.952574127	0.880797078	0.119216763	-0.104383361
Comb077	0.740112994	2.092395679	0.007568507	0.02227016	0.012273392	0.012620696	0.128	0.807	0.432	0.39	0.002985817	0.880797078	0.952574127	0.880797078	0.125829926	-0.218542518
Comb078	0.719827586	4.955757629	0.010552788	0.029143268	0.01635454	0.016688633	0.161	0.53	0.3225	0.318277778	0.000475059	0.731058579	0.952574127	0.880797078	0.133996367	-0.236214317
Comb079	0.564935065	2.372874193	0.00913968	1	0.012776247	0.146224167	0.147	1	0.499	0.464666667	0.004761352	0.5	0.952574127	0.880797078	0.205382302	-0.269181575
Comb080	0.673170732	3.261470345	0.008028172	1	0.013632344	0.040745252	0.068	1	0.4525	0.4081	0.002022488	0.5	0.952574127	0.880797078	0.143862252	-0.088884847
Comb081	0.773195876	2.118496225	0.009896592	0.027781436	0.015996391	0.017797474	0.147	0.676	0.453	0.4284375	0.002111041	0.880797078	0.98201379	0.880797078	0.101287738	-0.22732039
Comb082	0.738562092	4.348552565	0.010598535	0.027781436	0.01763542	0.01840642	0	0	0	0	0.003605228	0.731058579	0.98201379	0.880797078	0.115821748	-0.203599134
Comb083	0.795081967	3.583984189	0.007713218	0.029798446	0.013958656	0.014604153	0.149	1	0.4355	0.489	0.001233451	0.880797078	0.98201379	0.880797078	0.09449249	-0.178292147
Comb084	0.672131148	2.809403037	0.011092706	0.027781436	0.016308172	0.017804849	0.147	0.676	0.439	0.416	0.002603489	0.880797078	0.952574127	0.92414182	0.092561176	-0.409119125
Comb085	0.77027027	4.459008244	0.008422105	0.016661297	0.012474889	0.012581355	0.222	0.538	0.3355	0.347583333	0.005093379	0.880797078	0.98201379	0.952574127	0.068551503	-0.283926651
Comb086	0.758169935	3.80924169	0.009042167	0.030896829	0.017371018	0.018910758	0.128	0.769	0.29	0.331333333	0.001498127	0.880797078	0.98201379	0.92414182	0.091686969	-0.159029579
Comb087	0.798449612	2.956801789	0.008322752	0.02227016	0.012862937	0.014458374	0.128	0.807	0.3535	0.401916667	0.003904071	0.880797078	0.952574127	0.880797078	0.11394823	-0.257540639
Comb088	0.849246231	7.325543159	0.009876303	0.024011243	0.020259548	0.018735669	0.209	0.442	0.3245	0.307	0	0.880797078	0.952574127	0.880797078	0.11394823	-0.283378879
Comb089	0.570093458	2.099585698	0.011092706	0.027781436	0.016308172	0.017804849	0.147	0.676	0.439	0.416	0.002603489	0.880797078	0.952574127	0.92414182	0.092561176	-0.409119125
Comb090	0.740740741	5.489785795	0.008930854	0.02851581	0.016300751	0.016659053	0.068	0.749	0.372	0.3809	0.002312268	0.731058579	0.98201379	0.880797078	0.11623383	-0.143629693
Comb091	0.702290076	3.329015154	0.006402309	1	0.013661064	0.046371341	0.069	1	0.4595	0.41994	0.001119575	0.5	0.98201379	0.880797078	0.138891084	-0.117179898
Comb092	0.798029557	2.297810401	0.006638447	1	0.015754765	0.032741836	0	0	0	0	0.001302888	0.5	0.98201379	0.880797078	0.119831232	-0.127052503
Comb093	0.705882353	3.199437051	0.005862235	0.029900785	0.012562137	0.013405026	0.072	1	0.436	0.485011429	0.000354543	0.731058579	0.98201379	0.880797078	0.104905545	-0.095341946
Comb094	0.73964497	2.516919647	0.006638447	1	0.013831885	0.076751931	0.114	1	0.43	0.39994	0.001342091	0.5	0.98201379	0.880797078	0.155869664	-0.273273491
Comb095	0.84079602	3.715692371	0.005404402	0.021863861	0.009585719	0.010571266	0.035	0.688	0.367	0.341733333	0.001127756	0.880797078	0.98201379	0.952574127	0.07350414	-0.206436868
Comb096	0.704301075	2.570234955	0.006638447	1	0.015246926	0.030487943	0.063	1	0.223	0.300955556	0.000790199	0.5	0.98201379	0.880797078	0.112389357	-0.065790045
Comb097	0.766467066	2.263182855	0.006268977	0.08440759	0.012021917	0.015673788	0.076	0.829	0.431	0.381386667	0.001244366	0.731058579	0.952574127	0.880797078	0.134049924	-0.164901798
Comb098	0.771929825	4.067498935	0.007010331	0.036558206	0.015924979	0.016383038	0.072	0.501	0.287	0.288906667	0.000123181	0.731058579	0.952574127	0.880797078	0.126708104	-0.198081859
Comb099	0.716981132	2.520404304	0.006638447	1	0.013831885	0.076751931	0.114	1	0.43	0.39994	0.001342091	0.5	0.98201379	0.880797078	0.155869664	-0.273273491
Comb100	0.718592965	2.388572296	0.006187318	1	0.014116477	0.027483089	0.067	1	0.4255	0.3797	0.000690856	0.5	0.98201379	0.880797078	0.130481818	-0.056844558
Comb101	0.850877193	1.92225223	0.007618992	1	0.013578944	0.064737902	0.062	1	0.4525	0.439375	0.001909704	0.5	0.98201379	0.92414182	0.130912446	-0.115531569
Comb102	0.815028902	4.403739553	0.009515238	1	0.015918084	0.042074553	0	0	0	0	0.001979174	0.5	0.98201379	0.952574127	0.111822281	-0.125434487
Comb103	0.856115108	1.562628573	0.006466626	0.036897648	0.012987405	0.013989961	0.056	1	0.4355	0.476633929	0.000533588	0.880797078	0.98201379	0.952574127	0.081739381	-0.108881142
Comb104	0.855263158	3.889933338	0.009114738	1	0.012870977	0.113283723	0.062	1	0.4295	0.41415625	0.002227286	0.5	0.98201379	0.952574127	0.167461156	-0.252055032
Comb105	0.858823529	4.755507356	0.006795343	0.018241523	0.010511683	0.010955471	0.048	0.548	0.2975	0.2909375	0.001602832	0.880797078	0.98201379	0.952574127	0.067005005	-0.203309036
Comb106	0.81871345	4.258348472	0.008945665	1	0.015303095	0.039240172	0.05	1	0.221	0.308861111	0.00132566	0.5	0.98201379	0.952574127	0.100264173	-0.068288262
Comb107	0.798561151	3.242567783	0.006927502	0.034293642	0.011728924	0.01339516	0.05	0.807	0.395	0.3619375	0.001645729	0.731058579	0.952574127	0.880797078	0.102481502	-0.186843253
Comb108	0.788944724	6.12081853	0.009849533	0.034152158	0.016589748	0.016966579	0.061	0.44	0.2755	0.269770833	0.000209461	0.731058579	0.952574127	0.952574127	0.094877217	-0.220285778
Comb109	0.846153846	2.579619058	0.009114738	1	0.012870977	0.113283723	0.062	1	0.4295	0.41415625	0.002227286	0.5	0.98201379	0.952574127	0.167461156	-0.252055032
Comb110	0.85106383	5.129923699	0.007387151	1	0.013485138	0.035411498	0.042	1	0.4125	0.365	0.001028477	0.5	0.98201379	0.952574127	0.11480395	-0.062895459
Comb111	0.633333333	2.999925231	0.007614076	1	0.013749389	0.045758444	0.087	1	0.4475	0.42489	0.001709667	0.5	0.98201379	0.880797078	0.141712624	-0.115432922
Comb112	0.760416667	1.975628344	0.007614076	1	0.015440401	0.03258088	0	0	0	0	0.001646576	0.5	0.98201379	0.880797078	0.126329822	-0.121628477
Comb113	0.72	3.37105343	0.005913904	0.029900785	0.012915303	0.013580426	0.072	1	0.438	0.488817143	0.000396836	0.880797078	0.98201379	0.880797078	0.103898474	-0.09742358
Comb114	0.689873418	1.481900955	0.007614076	1	0.012378472	0.074673488	0.114	1	0.4475	0.4159	0.00195949	0.5	0.98201379	0.880797078	0.158507518	-0.271710201
Comb115	0.811518325	3.207757425	0.00654875	0.017439652	0.010447962	0.010817416	0.035	0.758	0.356	0.32328	0.001444605	0.731058579	0.98201379	0.952574127	0.088538798	-0.192476774
Comb116	0.63372093	1.857518533	0.007614076	1	0.015477074	0.030945862	0.063	1	0.232	0.313302222	0.001190414	0.5	0.98201379	0.880797078	0.114331093	-0.064922873
Comb117	0.742138365	1.542431998	0.006305249	1	0.012519386	0.02583589	0.087	1	0.426	0.380173333	0.001734289	0.5	0.952574127	0.880797078	0.140215498	-0.159810789
Comb118	0.748858447	5.012013577	0.007649767	0.041656623	0.015813258	0.016707635	0.072	0.543	0.295	0.292586667	0.000174262	0.731058579	0.952574127	0.880797078	0.139083775	-0.186780751
Comb119	0.662162162	1.654053139	0.007614076	1	0.012378472	0.074673488	0.114	1	0.4475	0.4159	0.00195949	0.5	0.98201379	0.880797078	0.158507518	-0.271710201
Comb120	0.689473684	2.910142764	0.006794352	1	0.013375912	0.028720535	0.066	1	0.425	0.37796	0.000912561	0.5	0.98201379	0.880797078	0.134557001	-0.053843939
Comb121	0.906077348	5.058123148	0.006402309	1	0.011126671	0.045743835	0	0	0	0	0.006066176	0.5	0.952574127	0.880797078	0.138337057	-0.148156142
Comb122	0.916334661	4.52772683	0.006638447	1	0.013109773	0.03447471	0	0	0	0	0.005755396	0.5	0.952574127	0.880797078	0.13499624	-0.142309712
Comb123	0.841025641	4.089417792	0.005528253	0.030055608	0.01034215	0.011660998	0	0	0	0	0.000930832	0.880797078	0.98201379	0.880797078	0.103409402	-0.127260305
Comb124	0.909502262	4.37335775	0.006638447	1	0.009917008	0.077409721	0	0	0	0	0.007254591	0.5	0.952574127	0.880797078	0.154099972	-0.305465399
Comb125	0.834821429	3.443069909	0.005404402	0.019415862	0.008970696	0.009565604	0	0	0	0	0.003252513	0.880797078	0.952574127	0.952574127	0.07052603	-0.239837195
Comb126	0.855319149	4.142437721	0.006638447	1	0.013259176	0.032427812	0	0	0	0	0.004099888	0.5	0.98201379	0.880797078	0.115125672	-0.093475947
Comb127	0.921658986	4.156816967	0.007065653	0.027817443	0.011053404	0.012482116	0	0	0	0	0.004371054	0.731058579	0.952574127	0.880797078	0.144244128	-0.18512981
Comb128	0.828897338	5.161848425	0.007912836	0.042158062	0.014185116	0.015003012	0	0	0	0	0.000309119	0.731058579	0.952574127	0.880797078	0.134604965	-0.220607213
Comb129	0.834170854	4.137512084	0.006638447	1	0.009917008	0.077409721	0	0	0	0	0.007254591	0.5	0.952574127	0.880797078	0.154099972	-0.305465399
Comb130	0.907335907	4.923088961	0.006585072	1	0.010976103	0.027192661	0	0	0	0	0.002521649	0.5	0.952574127	0.880797078	0.130653825	-0.087094768
Comb131	0.6796875	3.355162295	0.006402309	1	0.013231325	0.03774432	0.069	1	0.4305	0.409669118	0.00168241	0.5	0.98201379	0.880797078	0.117987067	-0.117907525
Comb132	0.791044776	2.30401848	0.006638447	1	0.014738956	0.027333035	0	0	0	0	0.001603462	0.5	0.98201379	0.880797078	0.108784304	-0.117923042
Comb133	0.712418301	3.221552389	0.005862235	1	0.012597526	0.01919528	0.07	1	0.408	0.463184874	0.000547053	0.5	0.98201379	0.880797078	0.096859084	-0.083212016
Comb134	0.699386503	2.531068117	0.006638447	1	0.012478603	0.059765021	0.11	1	0.436	0.407617647	0.001865565	0.5	0.98201379	0.92414182	0.123906395	-0.28506037
Comb135	0.84	3.718630972	0.005404402	0.018284478	0.009546565	0.010240909	0.035	0.688	0.299	0.29495098	0.001167006	0.731058579	0.98201379	0.952574127	0.07237838	-0.187386238
Comb136	0.659217877	2.579535231	0.006638447	1	0.014734824	0.02997066	0.063	1	0.246	0.309957516	0.001165665	0.5	0.98201379	0.952574127	0.098542626	-0.059460386
Comb137	0.77245509	2.27484778	0.006305249	1	0.011501508	0.022591418	0.076	1	0.379	0.359117647	0.001427697	0.5	0.952574127	0.880797078	0.125726962	-0.15304837
Comb138	0.743243243	4.062331234	0.007173044	0.041656623	0.015915666	0.016328762	0.072	0.543	0.269	0.277019608	0.000129793	0.731058579	0.952574127	0.880797078	0.109937764	-0.194675808
Comb139	0.673202614	2.54082441	0.006638447	1	0.012478603	0.059765021	0.11	1	0.436	0.407617647	0.001865565	0.5	0.98201379	0.92414182	0.123906395	-0.28506037
Comb140	0.670157068	2.388748179	0.006187318	1	0.012611983	0.027160522	0.06	1	0.375	0.355541176	0.00080906	0.5	0.98201379	0.880797078	0.117104536	-0.050045451
Comb141	0.727272727	5.434276148	0.007070812	1	0.01439647	0.033329774	0.116	1	0.4435	0.415181818	0.001254206	0.5	0.98201379	0.880797078	0.118689182	-0.127048191
Comb142	0.770562771	3.539154763	0.007614076	1	0.015960154	0.028875362	0	0	0	0	0.001458345	0.5	0.98201379	0.880797078	0.108202754	-0.128347373
Comb143	0.692307692	4.463525085	0.005913904	0.029798446	0.013553497	0.01390982	0.116	1	0.4315	0.491253247	0.000387214	0.731058579	0.98201379	0.880797078	0.092583111	-0.09733077
Comb144	0.759803922	4.556512536	0.007614076	1	0.014165721	0.049807814	0.122	1	0.3885	0.388431818	0.001471393	0.5	0.98201379	0.952574127	0.113407684	-0.305401862
Comb145	0.78125	4.56501843	0.006501637	1	0.011365715	0.026093417	0.045	1	0.3045	0.325878788	0.001574726	0.5	0.98201379	0.952574127	0.094658848	-0.174948551
Comb146	0.680751174	4.036987344	0.007614076	1	0.0159391	0.027948217	0.082	1	0.2425	0.302242424	0.000852766	0.5	0.98201379	0.952574127	0.092738782	-0.075107011
Comb147	0.782178218	4.190977664	0.006305249	0.054468541	0.012643114	0.013979712	0.093	0.829	0.422	0.379454545	0.001738146	0.731058579	0.952574127	0.880797078	0.126462696	-0.162155418
Comb148	0.73015873	2.537572444	0.007649767	0.041656623	0.016637333	0.017267151	0.116	0.543	0.2825	0.28319697	0.000102894	0.731058579	0.952574127	0.880797078	0.114231163	-0.20022519
Comb149	0.688172043	4.652881687	0.007614076	1	0.014165721	0.049807814	0.122	1	0.3885	0.388431818	0.001471393	0.5	0.98201379	0.952574127	0.113407684	-0.305401862
Comb150	0.728448276	2.661352632	0.006794352	1	0.01453519	0.023099022	0.067	1	0.43	0.378781818	0.00081637	0.5	0.98201379	0.880797078	0.11186642	-0.065126348
Comb151	0.712121212	2.793007254	0.006402309	1	0.013166952	0.173100709	0.134	1	0.44	0.4896	0.00996852	0.5	0.952574127	0.880797078	0.215114296	-0.119677181
Comb152	0.78	2.353760778	0.006638447	1	0.016398021	0.095475388	0	0	0	0	0.006533508	0.5	0.952574127	0.880797078	0.17188106	-0.15372317
Comb153	0.697368421	2.652617131	0.006071283	0.02386433	0.011984579	0.012605445	0.138	1	0.357	0.402857143	0.001124055	0.880797078	0.98201379	0.880797078	0.097772579	-0.181195405
Comb154	0.693251534	2.387976702	0.006638447	1	0.013725476	0.331749278	0.147	1	0.583	0.6306	0.011646716	0.5	0.952574127	0.880797078	0.337667415	-0.170196234
Comb155	0.817258883	3.632667108	0.005404402	0.01311557	0.009111551	0.009492215	0.067	0.467	0.272	0.252933333	0.003797468	0.880797078	0.98201379	0.952574127	0.068403735	-0.290257767
Comb156	0.668508287	2.530204806	0.006638447	1	0.014574882	0.095854929	0.11	1	0.227	0.374022222	0.005984043	0.5	0.98201379	0.880797078	0.151748682	-0.105151214
Comb157	0.773809524	1.907243987	0.00707989	0.02227016	0.011583078	0.012906308	0.128	0.807	0.319	0.3558	0.004158004	0.731058579	0.952574127	0.880797078	0.133728584	-0.243943632
Comb158	0.697674419	4.255566707	0.007912836	0.02257532	0.016438411	0.015635387	0.149	0.394	0.256	0.263266667	0.000441112	0.880797078	0.952574127	0.880797078	0.11822564	-0.285284816
Comb159	0.700636943	2.08390696	0.006638447	1	0.013725476	0.331749278	0.147	1	0.583	0.6306	0.011646716	0.5	0.952574127	0.880797078	0.337667415	-0.170196234
Comb160	0.621621622	2.648847914	0.006585072	1	0.013206923	0.076906529	0.068	1	0.36	0.38	0.003403543	0.5	0.952574127	0.880797078	0.159921021	-0.106125849
Comb161	0.934343434	6.62567405	0.005825577	1	0.012057187	0.049269566	0.071	1	0.423	0.385	0.003002858	0.5	0.993307149	0.952574127	0.110842647	-0.122040454
Comb162	0.920454545	5.316423206	0.00655566	1	0.013584718	0.031886097	0	0	0	0	0.002067753	0.5	0.993307149	0.952574127	0.095829402	-0.127866453
Comb163	0.867298578	6.238585399	0.004530353	0.320910662	0.011702211	0.013944074	0.05	1	0.4025	0.445928571	0.001075249	0.731058579	0.993307149	0.952574127	0.081020698	-0.096038911
Comb164	0.937238494	4.908512332	0.005825577	1	0.011577832	0.08389713	0.071	1	0.1915	0.336886364	0.002926946	0.5	0.993307149	0.952574127	0.131533028	-0.274422246
Comb165	0.838983051	3.733296469	0.005148695	0.016671055	0.008994648	0.009374106	0.046	0.538	0.2775	0.264348485	0.001090767	0.880797078	0.993307149	0.952574127	0.058832617	-0.19792051
Comb166	0.880952381	4.638833111	0.005825577	1	0.013862852	0.032409581	0.053	1	0.1975	0.281242424	0.001595679	0.5	0.993307149	0.952574127	0.087662845	-0.067328676
Comb167	0.935344828	5.161076211	0.005378698	0.02227016	0.010034873	0.011059832	0.059	0.807	0.3295	0.320272727	0.001919877	0.731058579	0.98201379	0.880797078	0.099838793	-0.175925049
Comb168	0.857651246	6.82186372	0.007103167	0.024574072	0.015145199	0.014717051	0.052	0.442	0.2545	0.241909091	0	0.880797078	0.98201379	0.952574127	0.089834471	-0.21176761
Comb169	0.876146789	5.216635228	0.005825577	1	0.011577832	0.08389713	0.071	1	0.1915	0.336886364	0.002926946	0.5	0.993307149	0.952574127	0.131533028	-0.274422246
Comb170	0.907749077	6.039640977	0.005303718	1	0.011996434	0.026972931	0.039	1	0.3315	0.319986364	0.000932101	0.5	0.993307149	0.952574127	0.100317009	-0.063821487
Comb171	0.802325581	5.402773327	0.005825577	1	0.012599421	0.058516714	0.087	1	0.4565	0.419305556	0.001992175	0.5	0.952574127	0.880797078	0.161763323	-0.112539089
Comb172	0.782608696	1.650381583	0.006638447	1	0.015037647	0.039292955	0	0	0	0	0.002066504	0.5	0.952574127	0.880797078	0.137353683	-0.127761483
Comb173	0.721311475	4.982032145	0.004530353	0.029798446	0.011723984	0.012450013	0.072	1	0.4325	0.485579365	0.000691776	0.880797078	0.98201379	0.880797078	0.104961757	-0.113517163
Comb174	0.802884615	3.043541195	0.005825577	1	0.012263715	0.101738186	0.114	1	0.4475	0.404222222	0.002249785	0.5	0.952574127	0.880797078	0.185447059	-0.261927526
Comb175	0.804444444	2.472445727	0.005148695	0.017439652	0.009061223	0.009785681	0.035	0.688	0.305	0.310092593	0.00127418	0.731058579	0.98201379	0.952574127	0.094117714	-0.204054724
Comb176	0.711627907	1.860474487	0.005825577	1	0.014902641	0.036101672	0.063	1	0.211	0.309209877	0.001374713	0.5	0.98201379	0.880797078	0.124698415	-0.071712417
Comb177	0.7960199	2.772610682	0.005378698	0.03444183	0.011472871	0.01297372	0.087	0.829	0.425	0.381055556	0.001712655	0.731058579	0.952574127	0.880797078	0.134442673	-0.18274048
Comb178	0.750988142	4.141321615	0.007103167	0.041656623	0.014295616	0.01562593	0.072	0.543	0.273	0.274055556	0	0.731058579	0.952574127	0.880797078	0.130136299	-0.212885093
Comb179	0.71657754	3.604441158	0.005825577	1	0.012263715	0.101738186	0.114	1	0.4475	0.404222222	0.002249785	0.5	0.952574127	0.880797078	0.185447059	-0.261927526
Comb180	0.761702128	2.392095246	0.005303718	1	0.012599421	0.032794906	0.061	1	0.4145	0.374772222	0.001018249	0.5	0.98201379	0.880797078	0.144319149	-0.061238658
Comb181	0.931372549	11.50138722	0.009896592	1	0.014914661	0.082438352	0.116	1	0.428	0.457833333	0.004466778	0.5	0.98201379	0.880797078	0.140531412	-0.146702257
Comb182	0.898351648	9.425631076	0.010598535	1	0.016531535	0.057160524	0	0	0	0	0.003893524	0.5	0.98201379	0.880797078	0.139220102	-0.13882632
Comb183	0.873015873	10.10806807	0.007691998	0.024886404	0.01359051	0.013701656	0.116	1	0.424	0.454738095	0.000652429	0.880797078	0.98201379	0.880797078	0.095136261	-0.136273916
Comb184	0.911764706	10.57051958	0.010759193	1	0.015235511	0.14898141	0.147	1	0.535	0.50925	0.005371161	0.5	0.952574127	0.880797078	0.191124267	-0.269181575
Comb185	0.876080692	9.623529037	0.008422105	0.018284478	0.011032227	0.011261604	0.045	0.513	0.2975	0.309777778	0.003772229	0.880797078	0.98201379	0.952574127	0.071802049	-0.239301646
Comb186	0.856321839	9.777817823	0.009042167	1	0.016277888	0.046606222	0.082	1	0.2685	0.330222222	0.002886738	0.5	0.98201379	0.952574127	0.109128602	-0.100213486
Comb187	0.913173653	10.22041936	0.008214812	0.02227016	0.01338769	0.013258223	0.116	0.807	0.319	0.360166667	0.003245795	0.880797078	0.952574127	0.880797078	0.106819212	-0.223295197
Comb188	0.8125	6.939617743	0.009876303	0.023073965	0.017848343	0.017502768	0.116	0.501	0.279	0.299722222	0.00056338	0.880797078	0.952574127	0.880797078	0.106819212	-0.249133437
Comb189	0.878881988	10.71104397	0.010759193	1	0.015235511	0.14898141	0.147	1	0.535	0.50925	0.005371161	0.5	0.952574127	0.880797078	0.191124267	-0.269181575
Comb190	0.865013774	8.547475977	0.008930854	1	0.014562801	0.041638585	0.068	1	0.3705	0.382633333	0.002351069	0.5	0.98201379	0.880797078	0.129481367	-0.089007696
Comb191	0.595238095	0.621772299	0.008914637	1	0.012730465	0.071333266	0	0	0	0	0.003545388	0.5	0.98201379	0.880797078	0.14766043	-0.160290835
Comb192	0.843373494	4.228828876	0.010029537	1	0.015779884	0.053145341	0	0	0	0	0.003284307	0.5	0.952574127	0.880797078	0.152536248	-0.14622777
Comb193	0.596153846	1.92214365	0.007691998	0.036897648	0.013135933	0.013405257	0	0	0	0	0.001042182	0.880797078	0.98201379	0.880797078	0.095885581	-0.156242192
Comb194	0.78030303	3.14006759	0.010017166	1	0.012730465	0.126668256	0	0	0	0	0.004207574	0.5	0.98201379	0.880797078	0.195630665	-0.285392772
Comb195	0.816993464	4.31561911	0.008170927	0.01311557	0.010278936	0.010466317	0	0	0	0	0.00204455	0.880797078	0.952574127	0.952574127	0.064045104	-0.267776186
Comb196	0.6875	3.890382861	0.010017166	1	0.014736253	0.04118326	0	0	0	0	0.0021361	0.5	0.98201379	0.880797078	0.121328419	-0.108731265
Comb197	0.758064516	2.633081631	0.008214812	0.034293642	0.012142084	0.01342666	0	0	0	0	0.002828354	0.880797078	0.952574127	0.880797078	0.125829926	-0.225002078
Comb198	0.8125	6.30441778	0.010552788	0.021693619	0.01642755	0.016577748	0	0	0	0	0	0.880797078	0.952574127	0.880797078	0.121077247	-0.255592997
Comb199	0.630630631	1.864262293	0.010017166	1	0.012730465	0.126668256	0	0	0	0	0.004207574	0.5	0.98201379	0.880797078	0.195630665	-0.285392772
Comb200	0.76969697	5.001113352	0.008962739	1	0.013606208	0.038071757	0	0	0	0	0.001600364	0.5	0.98201379	0.880797078	0.134660058	-0.104546601
Comb201	0.671875	3.359646262	0.006550716	1	0.014833153	0.071701716	0.147	1	0.4975	0.472892857	0.001840096	0.5	0.98201379	0.880797078	0.164599628	-0.103638751
Comb202	0.792079208	2.305264165	0.007614076	1	0.016029928	0.044829017	0	0	0	0	0.001833031	0.5	0.98201379	0.880797078	0.125445947	-0.133605185
Comb203	0.730769231	3.225375505	0.005913904	0.029900785	0.012451803	0.012978661	0.147	1	0.4545	0.512714286	0.000430007	0.731058579	0.98201379	0.880797078	0.101260073	-0.111154815
Comb204	0.701219512	2.533611978	0.007614076	1	0.014833153	0.127184464	0.147	1	0.5095	0.479678571	0.002184335	0.5	0.98201379	0.880797078	0.199501461	-0.241809091
Comb205	0.835	3.719252302	0.006120598	0.015860064	0.009254877	0.010139493	0.067	0.685	0.3885	0.3555	0.001998076	0.880797078	0.98201379	0.952574127	0.08345331	-0.208655095
Comb206	0.661111111	2.581271912	0.007614076	1	0.015255104	0.041550609	0.11	1	0.239	0.345492063	0.001259093	0.5	0.98201379	0.880797078	0.11414809	-0.076198709
Comb207	0.766467066	2.277001394	0.006268977	0.08440759	0.011540902	0.015829321	0.128	0.829	0.466	0.415738095	0.001702024	0.731058579	0.952574127	0.880797078	0.121966467	-0.189152652
Comb208	0.738738739	4.061589991	0.007388508	0.028803797	0.015617223	0.015875144	0.149	0.543	0.336	0.318833333	0.000386832	0.731058579	0.952574127	0.880797078	0.12400333	-0.212954029
Comb209	0.675324675	2.544404471	0.007614076	1	0.014833153	0.127184464	0.147	1	0.5095	0.479678571	0.002184335	0.5	0.98201379	0.880797078	0.199501461	-0.241809091
Comb210	0.68556701	2.38898267	0.006187318	1	0.013950168	0.036995735	0.067	1	0.4565	0.409214286	0.001071164	0.5	0.98201379	0.880797078	0.131753875	-0.067739899
Comb211	0.724637681	4.199127765	0.006402309	1	0.013166952	0.067458609	0.134	1	0.434	0.42965	0.002316517	0.5	0.98201379	0.880797078	0.139615035	-0.115484541
Comb212	0.815165877	3.329521056	0.006638447	1	0.015316133	0.04216109	0	0	0	0	0.002066927	0.5	0.98201379	0.880797078	0.115100482	-0.130811848
Comb213	0.740740741	3.685363028	0.005862235	0.029900785	0.012088376	0.012657491	0.138	1	0.376	0.455057143	0.000300748	0.880797078	0.98201379	0.952574127	0.089540691	-0.109735394
Comb214	0.74137931	3.860233537	0.006638447	1	0.012651079	0.119305154	0.147	1	0.451	0.4459	0.002720965	0.5	0.98201379	0.880797078	0.170362601	-0.257809148
Comb215	0.845410628	4.662852546	0.005404402	0.015860064	0.009111551	0.009957868	0.067	0.685	0.321	0.322088889	0.002720927	0.880797078	0.98201379	0.952574127	0.066000322	-0.21296928
Comb216	0.733333333	3.766162922	0.006638447	1	0.014574882	0.042665553	0.11	1	0.231	0.316666667	0.00162144	0.5	0.98201379	0.952574127	0.106222659	-0.070985337
Comb217	0.774566474	3.506524361	0.006405831	0.02227016	0.011498727	0.012456736	0.116	0.829	0.409	0.359422222	0.001943446	0.731058579	0.952574127	0.880797078	0.117154508	-0.180825809
Comb218	0.772532189	3.522941557	0.007173044	0.028803797	0.015619742	0.015654588	0.137	0.475	0.285	0.288177778	0.000742069	0.880797078	0.952574127	0.880797078	0.106819212	-0.216999345
Comb219	0.719512195	3.795873289	0.006638447	1	0.012651079	0.119305154	0.147	1	0.451	0.4459	0.002720965	0.5	0.98201379	0.880797078	0.170362601	-0.257809148
Comb220	0.707920792	2.715357254	0.006473006	1	0.01280914	0.034761897	0.062	1	0.394	0.371826667	0.001290166	0.5	0.98201379	0.880797078	0.118776963	-0.067578008
Comb221	0.634146341	3.322237444	0.007614076	1	0.012592065	0.049877756	0.087	1	0.439	0.403488636	0.002419825	0.5	0.98201379	0.880797078	0.133817002	-0.119921777
Comb222	0.74611399	1.65427257	0.007614076	1	0.015488961	0.035499346	0	0	0	0	0.002074474	0.5	0.98201379	0.880797078	0.114990735	-0.129560797
Comb223	0.701986755	3.644784901	0.005913904	1	0.012881235	0.02276545	0.07	1	0.411	0.476493506	0.000647242	0.5	0.98201379	0.880797078	0.104522473	-0.093392815
Comb224	0.68125	1.217056834	0.007614076	1	0.012084392	0.082909715	0.114	1	0.438	0.391386364	0.002696775	0.5	0.98201379	0.880797078	0.145607602	-0.28120335
Comb225	0.796875	2.800613414	0.00654875	0.02377689	0.009884625	0.010932168	0.035	0.688	0.305	0.29019697	0.001172498	0.731058579	0.98201379	0.952574127	0.080127348	-0.197481457
Comb226	0.577380952	1.373729044	0.007614076	1	0.015560828	0.034136323	0.063	1	0.215	0.30489899	0.00161071	0.5	0.98201379	0.880797078	0.106010086	-0.069837113
Comb227	0.732919255	1.348200566	0.006305249	0.03444183	0.011667021	0.013428123	0.087	0.829	0.3945	0.36380303	0.002157331	0.731058579	0.952574127	0.880797078	0.120712089	-0.175907431
Comb228	0.747747748	5.110575972	0.007649767	0.041656623	0.015840963	0.017177706	0.072	0.543	0.2725	0.270651515	0	0.731058579	0.952574127	0.880797078	0.118119718	-0.204338041
Comb229	0.597222222	1.632101655	0.007614076	1	0.012084392	0.082909715	0.114	1	0.438	0.391386364	0.002696775	0.5	0.98201379	0.880797078	0.145607602	-0.28120335
Comb230	0.702564103	2.907985409	0.006794352	1	0.013188817	0.03033739	0.062	1	0.403	0.359827273	0.001026048	0.5	0.98201379	0.880797078	0.121526795	-0.063467378
Comb231	0.733333333	3.948292668	0.005825577	1	0.011869555	0.038418402	0.116	1	0.444	0.407125	0.002828854	0.5	0.98201379	0.92414182	0.112846826	-0.137172401
Comb232	0.838862559	3.29971219	0.007548293	1	0.014784476	0.029720173	0	0	0	0	0.002480141	0.5	0.98201379	0.952574127	0.108698221	-0.13213376
Comb233	0.690789474	3.526907505	0.004530353	1	0.012340171	0.025686186	0.07	1	0.4205	0.510508929	0.001023098	0.5	0.98201379	0.952574127	0.096988619	-0.097207116
Comb234	0.817679558	2.751172539	0.005825577	1	0.011619596	0.061578662	0.116	1	0.384	0.35196875	0.003052769	0.5	0.98201379	0.952574127	0.122438949	-0.300652451
Comb235	0.72826087	1.348352756	0.005148695	0.016671055	0.009333482	0.00968462	0.065	0.691	0.336	0.324833333	0.00138144	0.880797078	0.98201379	0.952574127	0.06283532	-0.211053933
Comb236	0.739583333	2.632419122	0.005825577	1	0.014185716	0.027047289	0.087	1	0.2255	0.294958333	0.001766694	0.5	0.98201379	0.952574127	0.091074317	-0.08105333
Comb237	0.810344828	2.573739497	0.005378698	0.02227016	0.010151265	0.01137594	0.093	0.807	0.4065	0.358541667	0.00226939	0.880797078	0.952574127	0.880797078	0.106819212	-0.186080756
Comb238	0.814345992	4.639660498	0.007103167	0.024574072	0.015645744	0.015227354	0.074	0.446	0.292	0.27675	0	0.731058579	0.952574127	0.880797078	0.102752609	-0.215985598
Comb239	0.651315789	2.715737385	0.005825577	1	0.011619596	0.061578662	0.116	1	0.384	0.35196875	0.003052769	0.5	0.98201379	0.952574127	0.122438949	-0.300652451
Comb240	0.820276498	3.82188243	0.005303718	1	0.011841311	0.022669891	0.062	1	0.4265	0.35748125	0.001181646	0.5	0.98201379	0.880797078	0.107109587	-0.074165035
Comb241	0.672	3.091591929	0.005244343	1	0.015226519	0.046267342	0	0	0	0	0.001495483	0.5	0.952574127	0.880797078	0.130240299	-0.118097435
Comb242	0.787878788	2.011189017	0.00636463	1	0.016300893	0.03205489	0	0	0	0	0.001700363	0.5	0.98201379	0.880797078	0.116026413	-0.123124074
Comb243	0.706666667	3.209258496	0.004530353	0.029798446	0.013598835	0.014520291	0	0	0	0	0.000354278	0.880797078	0.98201379	0.880797078	0.094641052	-0.09787319
Comb244	0.717791411	1.934066712	0.005244343	1	0.015065519	0.075713227	0	0	0	0	0.001749349	0.5	0.952574127	0.880797078	0.14745931	-0.273950597
Comb245	0.837563452	3.391231948	0.00477545	0.021863861	0.011073287	0.011496455	0	0	0	0	0.001264881	0.731058579	0.98201379	0.952574127	0.07557328	-0.19663448
Comb246	0.668539326	2.119656747	0.005244343	1	0.016776336	0.035523997	0	0	0	0	0.001133078	0.5	0.98201379	0.880797078	0.108039651	-0.062406503
Comb247	0.768292683	1.793247353	0.004988779	0.074325879	0.012834937	0.014578989	0	0	0	0	0.001385324	0.731058579	0.952574127	0.880797078	0.126730938	-0.164487537
Comb248	0.756756757	4.499671072	0.007103167	0.041656623	0.017566867	0.018093154	0	0	0	0	0.000103716	0.731058579	0.952574127	0.880797078	0.116381179	-0.200675535
Comb249	0.692810458	2.00806508	0.005244343	1	0.015065519	0.075713227	0	0	0	0	0.001749349	0.5	0.952574127	0.880797078	0.14745931	-0.273950597
Comb250	0.692708333	2.554586628	0.005244343	1	0.014915687	0.027741373	0	0	0	0	0.000876984	0.5	0.98201379	0.880797078	0.125733016	-0.053860112
Comb251	0.917475728	6.074907142	0.006869114	1	0.012529594	0.053485835	0.069	1	0.4385	0.40495	0.002873563	0.5	0.952574127	0.880797078	0.14505335	-0.141480535
Comb252	0.9	4.455607969	0.007094656	1	0.015316133	0.040837698	0	0	0	0	0.00296967	0.5	0.952574127	0.880797078	0.14505335	-0.132293288
Comb253	0.843317972	5.533350801	0.006116099	0.029798446	0.012941798	0.01313077	0.073	1	0.3955	0.462157143	0.000852742	0.880797078	0.98201379	0.880797078	0.104332758	-0.126377635
Comb254	0.891666667	4.477831752	0.007094656	1	0.012056457	0.091916372	0.134	1	0.4005	0.39175	0.003375243	0.5	0.952574127	0.880797078	0.160253852	-0.299352206
Comb255	0.860557769	3.927489671	0.005780847	0.015331042	0.009939381	0.010189844	0.045	0.685	0.3095	0.317533333	0.001760951	0.880797078	0.952574127	0.952574127	0.072599926	-0.237803985
Comb256	0.837944664	4.132183124	0.007094656	1	0.014579187	0.038658148	0.068	1	0.208	0.297955556	0.00183798	0.5	0.98201379	0.880797078	0.114590813	-0.094051492
Comb257	0.907172996	4.548443515	0.007479343	0.059991412	0.01157132	0.015246227	0.076	0.807	0.4195	0.3787	0.002531188	0.731058579	0.952574127	0.880797078	0.140235148	-0.189179477
Comb258	0.814946619	5.839856305	0.007775905	0.024011243	0.015977331	0.015619672	0.075	0.481	0.252	0.266233333	0.000115062	0.880797078	0.952574127	0.880797078	0.129632069	-0.225620796
Comb259	0.857777778	4.745117178	0.007094656	1	0.012056457	0.091916372	0.134	1	0.4005	0.39175	0.003375243	0.5	0.952574127	0.880797078	0.160253852	-0.299352206
Comb260	0.907801418	4.997521799	0.00697369	1	0.013876388	0.030366156	0.067	1	0.3825	0.36252	0.001425859	0.5	0.952574127	0.880797078	0.131896643	-0.085892636
Comb261	0.910179641	4.542204634	0.005834119	1	0.013459996	0.025872659	0.128	1	0.452	0.425971429	0.00099084	0.5	0.98201379	0.880797078	0.108931845	-0.127580924
Comb262	0.915254237	4.403627337	0.006145365	1	0.014679274	0.023012204	0	0	0	0	0.00123004	0.5	0.98201379	0.880797078	0.10647693	-0.120848591
Comb263	0.864864865	4.204148002	0.004535997	0.029798446	0.012115282	0.01346252	0.136	1	0.435	0.518040816	0.000361276	0.731058579	0.98201379	0.952574127	0.088487059	-0.092202217
Comb264	0.913043478	3.79269554	0.006638447	1	0.012167532	0.035647319	0.128	1	0.332	0.364771429	0.001157031	0.5	0.98201379	0.92414182	0.111108056	-0.298476885
Comb265	0.844339623	3.488050486	0.004377932	0.023913047	0.010407444	0.010559255	0.145	1	0.36	0.356552381	0.001085242	0.880797078	0.98201379	0.952574127	0.066043939	-0.194338855
Comb266	0.86036036	3.849303294	0.005994643	1	0.014802147	0.022614443	0.1	1	0.231	0.307168254	0.000699887	0.5	0.98201379	0.952574127	0.09794336	-0.060677828
Comb267	0.904522613	3.658948816	0.005355543	0.081210293	0.012234923	0.014299068	0.1	1	0.433	0.391333333	0.001253587	0.731058579	0.952574127	0.880797078	0.119751761	-0.159641747
Comb268	0.841269841	6.476335118	0.00760684	0.034749582	0.014969956	0.016109803	0.143	0.657	0.281	0.292552381	0.000124094	0.731058579	0.952574127	0.880797078	0.111248624	-0.193983124
Comb269	0.892307692	3.458559666	0.006638447	1	0.012167532	0.035647319	0.128	1	0.332	0.364771429	0.001157031	0.5	0.98201379	0.92414182	0.111108056	-0.298476885
Comb270	0.905737705	5.401258512	0.005326346	1	0.013054417	0.019435603	0.065	1	0.4335	0.39196	0.000663474	0.5	0.98201379	0.880797078	0.111993322	-0.05577484
Comb271	0.822429907	1.823769499	0.005825577	1	0.0125225	0.028319446	0.069	1	0.4365	0.398357143	0.001150899	0.5	0.993307149	0.952574127	0.098843454	-0.123418537
Comb272	0.816568047	4.232064737	0.007207614	1	0.014772752	0.022755729	0	0	0	0	0.001038753	0.5	0.993307149	0.952574127	0.09173404	-0.121340704
Comb273	0.80620155	2.256078791	0.004530353	0.320910662	0.01240483	0.014509775	0.05	1	0.411	0.472033163	0.000436214	0.731058579	0.993307149	0.952574127	0.083977424	-0.082461075
Comb274	0.850340136	3.146022426	0.005825577	1	0.012057187	0.041006617	0.071	1	0.3345	0.355241071	0.001228911	0.5	0.993307149	0.952574127	0.102419835	-0.292914328
Comb275	0.714285714	3.911167906	0.005148695	0.023073461	0.009861916	0.010429802	0.036	0.731	0.3065	0.299934524	0.0008201	0.731058579	0.993307149	0.952574127	0.06153061	-0.184601407
Comb276	0.847953216	3.773374971	0.005825577	1	0.01453519	0.023056434	0.053	1	0.2245	0.287043651	0.00072819	0.5	0.993307149	0.952574127	0.085529035	-0.058841376
Comb277	0.781954887	2.697922039	0.005378698	0.096455784	0.011100606	0.013500556	0.059	0.807	0.3905	0.345630952	0.00108192	0.731058579	0.98201379	0.880797078	0.102653297	-0.162489434
Comb278	0.802030457	6.614066869	0.006382442	1	0.015816613	0.021718315	0.052	1	0.268	0.273047619	0.000194858	0.5	0.98201379	0.880797078	0.099925842	-0.191055128
Comb279	0.778625954	1.852616254	0.005825577	1	0.012057187	0.041006617	0.071	1	0.3345	0.355241071	0.001228911	0.5	0.993307149	0.952574127	0.102419835	-0.292914328
Comb280	0.840659341	5.298886326	0.005303718	1	0.012692053	0.021578682	0.039	1	0.385	0.349421429	0.000542026	0.5	0.993307149	0.952574127	0.099197546	-0.054319839
Comb281	0.836065574	2.675661226	0.005665831	1	0.013551012	0.028828276	0.057	1	0.341	0.346719298	0.001167757	0.5	0.98201379	0.952574127	0.092656686	-0.128080162
Comb282	0.971631206	6.527421206	0.006974368	1	0.015853673	0.023541778	0	0	0	0	0.001085419	0.5	0.98201379	0.952574127	0.096173275	-0.115376326
Comb283	0.912087912	3.298175866	0.005262266	1	0.013279021	0.017324439	0.06	1	0.321	0.414538847	0.000372865	0.5	0.98201379	0.952574127	0.088201602	-0.076711754
Comb284	0.914285714	5.408829225	0.006974368	1	0.013232356	0.041115992	0.063	1	0.315	0.3345	0.00125858	0.5	0.98201379	0.952574127	0.102817442	-0.290991579
Comb285	0.984848485	6.202663015	0.004919861	0.019380368	0.010720522	0.010975032	0.04	0.731	0.272	0.279736842	0.001353913	0.880797078	0.98201379	0.952574127	0.051097266	-0.193509608
Comb286	0.932330827	6.173264776	0.006974368	1	0.015471943	0.02439197	0.054	1	0.224	0.272516569	0.000874489	0.5	0.98201379	0.952574127	0.085603532	-0.057241735
Comb287	0.908163265	4.899110732	0.005581625	0.025693206	0.01223322	0.012841443	0.054	0.807	0.267	0.302397661	0.000973114	0.880797078	0.952574127	0.880797078	0.104129016	-0.159488572
Comb288	0.953757225	8.281805861	0.007018857	0.035296002	0.016788672	0.016694506	0.065	0.541	0.262	0.263035088	0.000283091	0.731058579	0.952574127	0.880797078	0.10451548	-0.184940348
Comb289	0.917525773	4.109864633	0.006974368	1	0.013232356	0.041115992	0.063	1	0.315	0.3345	0.00125858	0.5	0.98201379	0.952574127	0.102817442	-0.290991579
Comb290	0.96	7.339096016	0.005796286	1	0.013524575	0.022289644	0.034	1	0.3045	0.314654386	0.000681198	0.5	0.98201379	0.952574127	0.097841992	-0.05415025
Comb291	0.8125	4.186056149	0.005825577	1	0.011870621	0.029202979	0.11	1	0.423	0.39108	0.001928359	0.5	0.98201379	0.880797078	0.105455331	-0.132157922
Comb292	0.75	2.675396791	0.006145365	1	0.014026406	0.023687958	0	0	0	0	0.001891853	0.5	0.98201379	0.952574127	0.103955469	-0.124470538
Comb293	0.763975155	4.39627163	0.004530353	1	0.011800756	0.020482816	0.07	1	0.432	0.4814	0.000921753	0.5	0.98201379	0.952574127	0.089842966	-0.091946795
Comb294	0.755813953	2.132471666	0.005825577	1	0.011501106	0.043538871	0.11	1	0.3335	0.34476	0.001909841	0.5	0.98201379	0.952574127	0.112135058	-0.298550368
Comb295	0.755319149	2.899719853	0.004377932	0.016671055	0.00969952	0.009684509	0.065	0.758	0.294	0.293386667	0.000893025	0.880797078	0.98201379	0.952574127	0.064863592	-0.196619687
Comb296	0.712765957	2.169726531	0.005825577	1	0.014013808	0.024730385	0.081	1	0.228	0.306795556	0.001303202	0.5	0.98201379	0.952574127	0.089732169	-0.069989505
Comb297	0.722222222	2.350918206	0.005355543	0.025697041	0.010862156	0.011444561	0.093	0.807	0.379	0.343253333	0.001544282	0.731058579	0.952574127	0.880797078	0.107317175	-0.173176819
Comb298	0.762114537	6.023313547	0.007103167	0.025056047	0.015565936	0.015270802	0.074	0.524	0.268	0.263813333	0	0.731058579	0.952574127	0.880797078	0.104216586	-0.202115647
Comb299	0.694267516	2.45548307	0.005825577	1	0.011501106	0.043538871	0.11	1	0.3335	0.34476	0.001909841	0.5	0.98201379	0.952574127	0.112135058	-0.298550368
Comb300	0.79245283	4.035828525	0.005303718	1	0.012214069	0.020568167	0.061	1	0.373	0.33886	0.000817021	0.5	0.98201379	0.880797078	0.103319391	-0.065549257
Comb301	0.609195402	1.523752571	0.008914637	0.032583374	0.012223945	0.014367726	0	0	0	0	0.002182725	0.880797078	0.98201379	0.952574127	0.08018025	-0.174912278
Comb302	0.81097561	4.239994074	0.009226603	0.024603138	0.01508349	0.014857308	0	0	0	0	0.001701058	0.731058579	0.98201379	0.952574127	0.089152398	-0.156752884
Comb303	0.657657658	2.727401174	0.008353933	0.023675244	0.012808025	0.013321555	0	0	0	0	0.001012105	0.880797078	0.98201379	0.952574127	0.084700566	-0.114568471
Comb304	0.785185185	2.785386676	0.009226603	0.018940832	0.011856266	0.012317418	0	0	0	0	0.002051019	0.880797078	0.98201379	0.952574127	0.075576435	-0.352588266
Comb305	0.805194805	3.949379671	0.007303763	0.021863861	0.010177135	0.011194976	0	0	0	0	0.002675138	0.880797078	0.98201379	0.952574127	0.056073161	-0.222889393
Comb306	0.666666667	3.652690281	0.009226603	0.05440615	0.014742059	0.017338448	0	0	0	0	0.001264422	0.880797078	0.98201379	0.952574127	0.073713854	-0.103487094
Comb307	0.753968254	2.606388561	0.007681912	0.023281723	0.011328826	0.012603151	0	0	0	0	0.002746498	0.880797078	0.952574127	0.880797078	0.101634471	-0.196338798
Comb308	0.803108808	6.843104793	0.009849533	0.035498769	0.016144691	0.017341429	0	0	0	0	0	0.880797078	0.952574127	0.880797078	0.096449731	-0.227361778
Comb309	0.652173913	1.647636954	0.009226603	0.018940832	0.011856266	0.012317418	0	0	0	0	0.002051019	0.880797078	0.98201379	0.952574127	0.075576435	-0.352588266
Comb310	0.816091954	5.310931567	0.00845626	0.027530128	0.012867556	0.014067024	0	0	0	0	0.001171517	0.880797078	0.98201379	0.952574127	0.088305916	-0.098042007
Comb311	0.744966443	4.466655579	0.009828432	1	0.014460928	0.114963392	0.147	1	0.5015	0.502125	0.004768892	0.5	0.952574127	0.880797078	0.187870548	-0.156777871
Comb312	0.714285714	2.595053357	0.011783271	1	0.016531535	0.077343455	0	0	0	0	0.004176455	0.5	0.952574127	0.880797078	0.182523784	-0.152937388
Comb313	0.672839506	4.499403548	0.007691998	0.021056059	0.01359051	0.013910464	0.149	1	0.4565	0.536892857	0.000714422	0.880797078	0.952574127	0.880797078	0.107837643	-0.180987284
Comb314	0.65497076	2.004672028	0.011092706	1	0.014122322	0.213245463	0.147	1	0.5185	0.513375	0.005730659	0.5	0.952574127	0.880797078	0.261792866	-0.255927726
Comb315	0.730964467	1.071347062	0.008558474	0.013701314	0.011521168	0.011153138	0.218	0.526	0.3935	0.376083333	0.00393391	0.880797078	0.952574127	0.952574127	0.07830314	-0.290215305
Comb316	0.612903226	1.684899001	0.011092706	1	0.016241838	0.060940576	0.128	1	0.255	0.344305556	0.003037065	0.5	0.952574127	0.880797078	0.137297236	-0.129459603
Comb317	0.754189944	2.443065526	0.008214812	0.02227016	0.013980648	0.013902512	0.128	0.807	0.4345	0.411083333	0.00355412	0.880797078	0.880797078	0.880797078	0.135335283	-0.252193876
Comb318	0.746835443	5.100628097	0.010552788	0.029143268	0.017639607	0.018379104	0.187	0.53	0.326	0.327	0.000616903	0.880797078	0.880797078	0.880797078	0.135335283	-0.278032115
Comb319	0.564935065	2.7347952	0.011092706	1	0.014122322	0.213245463	0.147	1	0.5185	0.513375	0.005730659	0.5	0.952574127	0.880797078	0.261792866	-0.255927726
Comb320	0.67961165	3.498065279	0.008962739	1	0.015173526	0.054931038	0.068	1	0.4725	0.4315	0.00245745	0.5	0.952574127	0.880797078	0.159421775	-0.116482038
Comb321	0.733333333	3.331751414	0.005825577	1	0.013914152	0.051461156	0.05	1	0.442	0.405829545	0.001415494	0.5	0.98201379	0.880797078	0.139018336	-0.118183274
Comb322	0.768844221	1.472657174	0.007094656	1	0.016303874	0.036427095	0	0	0	0	0.001468415	0.5	0.98201379	0.880797078	0.12029282	-0.127721543
Comb323	0.673333333	3.418135173	0.004530353	0.036897648	0.013093319	0.013775469	0.047	1	0.4345	0.462253247	0.000324598	0.880797078	0.98201379	0.880797078	0.097094455	-0.104283663
Comb324	0.679012346	1.540365269	0.005825577	1	0.013275195	0.086422901	0.05	1	0.21	0.376909091	0.001615245	0.5	0.98201379	0.880797078	0.154065992	-0.276207791
Comb325	0.818181818	2.88627553	0.005148695	0.019061056	0.010680156	0.010981922	0.035	0.688	0.3025	0.302848485	0.001383273	0.731058579	0.98201379	0.952574127	0.087696287	-0.193375348
Comb326	0.640449438	1.497446128	0.005825577	1	0.016294408	0.03436377	0.037	1	0.2095	0.296454545	0.000952126	0.5	0.98201379	0.880797078	0.109466579	-0.069843451
Comb327	0.767857143	1.406504375	0.005378698	0.057935163	0.012382644	0.014498516	0.037	0.829	0.3845	0.365893939	0.0015383	0.731058579	0.952574127	0.880797078	0.123304459	-0.176777892
Comb328	0.762114537	4.521882995	0.007103167	0.041656623	0.016589748	0.017019358	0.05	0.543	0.276	0.263575758	0.000133491	0.731058579	0.952574127	0.880797078	0.124235485	-0.201685105
Comb329	0.651315789	1.831873481	0.005825577	1	0.013275195	0.086422901	0.05	1	0.21	0.376909091	0.001615245	0.5	0.98201379	0.880797078	0.154065992	-0.276207791
Comb330	0.687179487	2.401651225	0.005303718	1	0.01398839	0.031145927	0.028	1	0.3925	0.361663636	0.000793288	0.5	0.98201379	0.880797078	0.131614412	-0.056842593
Comb331	0.927536232	6.345245899	0.005834119	1	0.014498522	0.057116446	0.05	1	0.434	0.400184211	0.001349202	0.5	0.98201379	0.92414182	0.123252592	-0.125571728
Comb332	0.907749077	4.915333012	0.006145365	1	0.016217966	0.037783566	0	0	0	0	0.001424861	0.5	0.98201379	0.952574127	0.111144215	-0.128492858
Comb333	0.853211009	5.739284921	0.004535997	0.029900785	0.013080616	0.013668297	0.047	1	0.43	0.457278195	0.00031529	0.880797078	0.98201379	0.952574127	0.083677724	-0.109323104
Comb334	0.904958678	4.846575008	0.007553293	1	0.013883127	0.097507575	0.05	1	0.223	0.375842105	0.001576431	0.5	0.98201379	0.880797078	0.157023472	-0.26487302
Comb335	0.846153846	4.100084612	0.004377932	0.015860064	0.010938666	0.010804812	0.035	0.767	0.338	0.339368421	0.001576422	0.880797078	0.98201379	0.952574127	0.063380176	-0.209314169
Comb336	0.85546875	4.516947388	0.005994643	1	0.015752137	0.035133156	0.037	1	0.211	0.286859649	0.000914195	0.5	0.98201379	0.952574127	0.102328507	-0.068604233
Comb337	0.920502092	4.950711231	0.005355543	0.02227016	0.011583078	0.012569011	0.037	0.807	0.409	0.338982456	0.001238599	0.880797078	0.952574127	0.880797078	0.102316674	-0.189388386
Comb338	0.843205575	6.245119788	0.00781866	0.028803797	0.015956339	0.016269414	0.05	0.524	0.272	0.270701754	0.000214966	0.731058579	0.952574127	0.880797078	0.101893858	-0.215649441
Comb339	0.836363636	5.043453337	0.007553293	1	0.013883127	0.097507575	0.05	1	0.223	0.375842105	0.001576431	0.5	0.98201379	0.880797078	0.157023472	-0.26487302
Comb340	0.895683453	5.526558195	0.005326346	1	0.013883127	0.031512624	0.028	1	0.395	0.356357895	0.000827488	0.5	0.98201379	0.880797078	0.117695394	-0.062384321
Comb341	0.942386831	9.159729641	0.00872387	1	0.014335556	0.046088305	0.069	1	0.43	0.413019231	0.00317132	0.5	0.98201379	0.880797078	0.122293102	-0.136019665
Comb342	0.911184211	7.194309563	0.00900514	1	0.016132143	0.035214898	0	0	0	0	0.003090508	0.5	0.98201379	0.880797078	0.122321855	-0.126803666
Comb343	0.903846154	9.042137428	0.007013692	0.029798446	0.013631574	0.014414962	0.073	1	0.431	0.464758242	0.000778712	0.880797078	0.98201379	0.880797078	0.091302022	-0.111187254
Comb344	0.920863309	6.887115945	0.00900514	1	0.013990661	0.075066389	0.128	1	0.43	0.423576923	0.003826205	0.5	0.98201379	0.92414182	0.132340638	-0.299044302
Comb345	0.848920863	5.937453324	0.007153446	0.018284478	0.010898882	0.011342473	0.039	0.767	0.297	0.326641026	0.001885328	0.880797078	0.98201379	0.952574127	0.063300621	-0.218882172
Comb346	0.884353741	6.448192273	0.00900514	1	0.016315939	0.03070706	0.068	1	0.232	0.303094017	0.002061712	0.5	0.98201379	0.952574127	0.09822817	-0.082193017
Comb347	0.914814815	7.434484935	0.008214812	0.02227016	0.012558767	0.013001394	0.076	0.807	0.374	0.350820513	0.002186191	0.880797078	0.952574127	0.880797078	0.119980475	-0.181213032
Comb348	0.856697819	8.659376217	0.01052429	0.025376502	0.017787191	0.017482027	0.075	0.501	0.252	0.267205128	0	0.880797078	0.952574127	0.880797078	0.117786931	-0.209244816
Comb349	0.914179104	7.583854889	0.00900514	1	0.013990661	0.075066389	0.128	1	0.43	0.423576923	0.003826205	0.5	0.98201379	0.92414182	0.132340638	-0.299044302
Comb350	0.93125	7.750957419	0.008452482	1	0.014374952	0.029503116	0.067	1	0.3685	0.353492308	0.001480754	0.5	0.98201379	0.880797078	0.113239355	-0.076328807
Comb351	0.91011236	2.819775553	0.01041267	0.033333699	0.013707026	0.016623164	0.147	0.632	0.4645	0.4068125	0.001573618	0.880797078	0.952574127	0.880797078	0.124641756	-0.234540672
Comb352	0.950920245	5.785639536	0.011960744	0.055282343	0.017444455	0.019202683	0	0	0	0	0.002288107	0.731058579	0.952574127	0.880797078	0.128482239	-0.221512943
Comb353	0.853211009	3.025899778	0.010074097	0.022587969	0.014919588	0.01538533	0.149	1	0.445	0.536857143	0.000746149	0.880797078	0.952574127	0.880797078	0.110892936	-0.192466001
Comb354	0.923076923	4.63066302	0.011092706	0.016772058	0.013509226	0.013880186	0.147	0.603	0.2895	0.327125	0.001856383	0.880797078	0.952574127	0.880797078	0.11394823	-0.418306372
Comb355	0.881118881	4.810316187	0.009291048	0.016700326	0.012955434	0.012482938	0.182	0.531	0.3405	0.351916667	0.003191724	0.880797078	0.952574127	0.952574127	0.085432158	-0.297620297
Comb356	0.894736842	5.265092703	0.011092706	0.030896829	0.018431157	0.018350774	0.128	0.769	0.2	0.292611111	0.001283118	0.880797078	0.952574127	0.880797078	0.104442872	-0.176847976
Comb357	0.918699187	4.179480316	0.011163028	0.022833694	0.014890565	0.016135717	0.128	0.807	0.446	0.405583333	0.002711987	0.880797078	0.880797078	0.880797078	0.135335283	-0.266727886
Comb358	0.887096774	7.546506826	0.011056512	0.023073965	0.01989838	0.018524152	0.187	0.436	0.304	0.294416667	0.000345185	0.880797078	0.880797078	0.880797078	0.135335283	-0.292566125
Comb359	0.860869565	3.450817094	0.011092706	0.016772058	0.013509226	0.013880186	0.147	0.603	0.2895	0.327125	0.001856383	0.880797078	0.952574127	0.880797078	0.11394823	-0.418306372
Comb360	0.954022989	6.675749569	0.010464594	0.054389571	0.016205783	0.017897532	0.068	0.813	0.447	0.39285	0.001622278	0.731058579	0.952574127	0.880797078	0.131991554	-0.158446269
Comb361	0.748201439	3.186873644	0.006402309	1	0.0142502	0.062541664	0.147	1	0.4405	0.431941176	0.002136816	0.5	0.98201379	0.92414182	0.127788977	-0.117775238
Comb362	0.753768844	3.238721951	0.006638447	1	0.015290733	0.039345374	0	0	0	0	0.001927319	0.5	0.98201379	0.92414182	0.111190737	-0.125186231
Comb363	0.7375	2.575680841	0.005582928	0.029900785	0.012341469	0.01371536	0.147	1	0.428	0.489546218	0.000410264	0.880797078	0.98201379	0.952574127	0.084599328	-0.105141395
Comb364	0.738372093	3.279213053	0.006638447	1	0.013670596	0.108286773	0.147	1	0.437	0.416882353	0.002486916	0.5	0.98201379	0.92414182	0.156177244	-0.262459144
Comb365	0.803030303	4.0316031	0.005404402	0.231382985	0.010013416	0.015410407	0.067	0.729	0.321	0.32727451	0.002372307	0.731058579	0.98201379	0.952574127	0.069095812	-0.200338428
Comb366	0.682795699	3.392670837	0.006638447	1	0.015516919	0.039006728	0.11	1	0.238	0.311836601	0.001494928	0.5	0.98201379	0.952574127	0.104094691	-0.063577943
Comb367	0.786127168	2.850079706	0.006055836	0.026770779	0.011993468	0.013337374	0.128	0.807	0.419	0.367117647	0.002147459	0.731058579	0.952574127	0.880797078	0.116411149	-0.172033806
Comb368	0.806722689	4.011270251	0.007581846	0.041656623	0.016788672	0.017381547	0.149	0.514	0.284	0.286294118	0.00040492	0.880797078	0.952574127	0.880797078	0.101786964	-0.212496231
Comb369	0.649350649	2.889533244	0.006638447	1	0.013670596	0.108286773	0.147	1	0.437	0.416882353	0.002486916	0.5	0.98201379	0.92414182	0.156177244	-0.262459144
Comb370	0.742718447	3.173321768	0.006585072	1	0.013298067	0.03410508	0.066	1	0.4365	0.379152941	0.001171181	0.5	0.98201379	0.880797078	0.118790024	-0.058029586
Comb371	0.707142857	3.659723446	0.005825577	1	0.012492658	0.048587439	0.087	1	0.443	0.426391304	0.001466134	0.5	0.952574127	0.880797078	0.137014711	-0.126157746
Comb372	0.762135922	1.03382758	0.006638447	1	0.015384971	0.03507341	0	0	0	0	0.001515614	0.5	0.952574127	0.880797078	0.119103348	-0.134881862
Comb373	0.701863354	3.509411254	0.004530353	1	0.011984579	0.021542443	0.072	1	0.435	0.508826087	0.000409414	0.5	0.98201379	0.880797078	0.107175414	-0.10017355
Comb374	0.727272727	1.742225431	0.005825577	1	0.012002095	0.08178197	0.114	1	0.442	0.404630435	0.001688815	0.5	0.952574127	0.880797078	0.147704885	-0.288539745
Comb375	0.803921569	2.648482001	0.005148695	0.017439652	0.009884625	0.010156171	0.035	0.688	0.321	0.317652174	0.001312774	0.731058579	0.98201379	0.952574127	0.08604806	-0.200994422
Comb376	0.62295082	1.262023353	0.005825577	1	0.014884266	0.03251323	0.063	1	0.223	0.313019324	0.000995492	0.5	0.98201379	0.880797078	0.116141941	-0.069138936
Comb377	0.74566474	1.459751237	0.005378698	0.03444183	0.012444105	0.01378231	0.087	0.829	0.433	0.393898551	0.001608363	0.731058579	0.952574127	0.880797078	0.130567948	-0.175485248
Comb378	0.756410256	4.082987301	0.007103167	0.041656623	0.015742664	0.016125068	0.072	0.543	0.285	0.284768116	0.000139571	0.731058579	0.952574127	0.880797078	0.123827538	-0.208063899
Comb379	0.639240506	2.090526027	0.005825577	1	0.012002095	0.08178197	0.114	1	0.442	0.404630435	0.001688815	0.5	0.952574127	0.880797078	0.147704885	-0.288539745
Comb380	0.727272727	1.949422163	0.005303718	1	0.013061123	0.029621003	0.062	1	0.4365	0.387521739	0.000808832	0.5	0.98201379	0.880797078	0.133302532	-0.061125319
Comb381	0.708955224	3.732687504	0.005244343	1	0.013440738	0.026844521	0.05	1	0.4565	0.416615079	0.000796627	0.5	0.98201379	0.880797078	0.105104585	-0.122256945
Comb382	0.800970874	2.767389089	0.00636463	1	0.014746405	0.022062497	0	0	0	0	0.00090693	0.5	0.98201379	0.880797078	0.0990844	-0.119089883
Comb383	0.711538462	3.385070965	0.004530353	1	0.012521567	0.016274602	0.047	1	0.434	0.489092971	0.000262692	0.5	0.993307149	0.952574127	0.091175083	-0.080362955
Comb384	0.721893491	3.18216582	0.005244343	1	0.01278385	0.037953425	0.05	1	0.4355	0.388547619	0.000930105	0.5	0.98201379	0.952574127	0.108786823	-0.291646879
Comb385	0.843137255	4.15299185	0.00477545	0.021863861	0.009962526	0.010435376	0.035	0.731	0.322	0.321227513	0.00085435	0.880797078	0.98201379	0.952574127	0.065467473	-0.185764083
Comb386	0.695187166	3.144341948	0.005244343	1	0.014811928	0.022626937	0.037	1	0.246	0.308469136	0.000578738	0.5	0.98201379	0.952574127	0.09241621	-0.057053739
Comb387	0.770588235	2.863943896	0.004802855	1	0.011520199	0.018133216	0.037	1	0.417	0.369962963	0.000870212	0.5	0.952574127	0.880797078	0.120714571	-0.149527698
Comb388	0.75877193	3.727906577	0.006382442	0.036558206	0.015940659	0.016255299	0.05	0.53	0.284	0.289063492	0.000107182	0.731058579	0.98201379	0.880797078	0.109272086	-0.186808424
Comb389	0.698113208	3.147933701	0.005244343	1	0.01278385	0.037953425	0.05	1	0.4355	0.388547619	0.000930105	0.5	0.98201379	0.952574127	0.108786823	-0.291646879
Comb390	0.69035533	2.448150405	0.005244343	1	0.013198881	0.021143378	0.028	1	0.4105	0.371592063	0.000476574	0.5	0.98201379	0.880797078	0.109275539	-0.049341385
Comb391	0.775956284	6.402093401	0.005244343	1	0.011963085	0.022679017	0	0	0	0	0.000593903	0.5	0.98201379	0.880797078	0.119086528	-0.125302045
Comb392	0.758333333	4.525452057	0.006145365	1	0.014563429	0.022596333	0	0	0	0	0.000848234	0.5	0.98201379	0.880797078	0.117436903	-0.117764423
Comb393	0.770731707	5.447500145	0.004535997	0.029900785	0.011672411	0.012335115	0	0	0	0	0.000308414	0.731058579	0.98201379	0.880797078	0.101668717	-0.086896363
Comb394	0.769585253	5.608056629	0.005244343	1	0.011182023	0.030005325	0	0	0	0	0.000716557	0.5	0.98201379	0.880797078	0.120308942	-0.297151803
Comb395	0.847389558	5.626955641	0.004377932	0.045589671	0.009589278	0.010443289	0	0	0	0	0.000692324	0.880797078	0.98201379	0.952574127	0.074011459	-0.194247139
Comb396	0.706140351	5.077460082	0.005244343	1	0.013832599	0.018848325	0	0	0	0	0.000455893	0.5	0.98201379	0.880797078	0.10363467	-0.062862322
Comb397	0.796296296	5.299693624	0.004988779	0.096910042	0.011210668	0.014367997	0	0	0	0	0.000909908	0.731058579	0.952574127	0.880797078	0.129282666	-0.157986647
Comb398	0.789855072	2.490713554	0.007173044	1	0.015284277	0.022917481	0	0	0	0	0.000108569	0.5	0.952574127	0.880797078	0.130390664	-0.182716889
Comb399	0.71	5.779197381	0.005244343	1	0.011182023	0.030005325	0	0	0	0	0.000716557	0.5	0.98201379	0.880797078	0.120308942	-0.297151803
Comb400	0.679487179	3.282545824	0.005244343	1	0.012428478	0.017678297	0	0	0	0	0.00043378	0.5	0.98201379	0.880797078	0.11918987	-0.056454096
Comb401	0.838461538	11.04826106	0.010748663	1	0.01663326	0.116915827	0.147	1	0.452	0.4751875	0.009906935	0.5	0.98201379	0.952574127	0.161043285	-0.16221808
Comb402	0.750830565	8.835610105	0.011653153	1	0.018399258	0.079848083	0	0	0	0	0.007049776	0.5	0.98201379	0.952574127	0.131975265	-0.182098853
Comb403	0.791208791	9.707582534	0.007691998	0.02557338	0.013553497	0.015035421	0.146	1	0.4535	0.529892857	0.001403345	0.880797078	0.98201379	0.952574127	0.07503675	-0.192401123
Comb404	0.776595745	10.07859305	0.011656946	1	0.018425899	0.215781795	0.147	1	0.4605	0.488875	0.011477231	0.5	0.98201379	0.952574127	0.21508483	-0.281248708
Comb405	0.779264214	8.983057041	0.008558474	0.016069333	0.011628869	0.011720463	0.165	0.731	0.318	0.360833333	0.002414293	0.731058579	0.98201379	0.952574127	0.087930183	-0.259201208
Comb406	0.704861111	9.238705739	0.011367708	1	0.017033878	0.062180253	0.128	1	0.2525	0.319555556	0.006087354	0.5	0.98201379	0.952574127	0.112413357	-0.132956428
Comb407	0.80565371	9.697796394	0.008214812	0.026770779	0.012886487	0.013713133	0.128	0.508	0.4365	0.3685	0.003965107	0.880797078	0.952574127	0.880797078	0.106819212	-0.259322894
Comb408	0.732307692	5.46642406	0.010552788	0.041656623	0.017598561	0.019792295	0.157	0.394	0.288	0.279916667	0	0.880797078	0.952574127	0.92414182	0.092561176	-0.299419169
Comb409	0.736842105	10.29586854	0.011656946	1	0.018425899	0.215781795	0.147	1	0.4605	0.488875	0.011477231	0.5	0.98201379	0.952574127	0.21508483	-0.281248708
Comb410	0.743506494	7.603176297	0.008962739	1	0.014764887	0.05604231	0.069	1	0.447	0.401175	0.002841544	0.5	0.98201379	0.952574127	0.127906329	-0.126610431
