# Supplementary material for: Discovery and Validation of Traditional Chinese and Western Medicine Combination Antirheumatoid Arthritis Drugs Based on Machine Learning (Random Forest Model)
Source: Biomed Res Int. 2023 Feb 15;2023:6086388. doi: 10.1155/2023/6086388 (PMC9950790; doi:10.1155/2023/6086388)
Supplement: Supplementary 4 — Prediction results of all Western and TCM combinations. [file 6086388.f4.txt]

Table S4 Prediction results of all Western and TCM combinations
Comb	DrugA	DrugB	Count
Comb001	MOL000254	DB00316	993
Comb002	MOL000254	DB00482	23
Comb003	MOL000254	DB14006	0
Comb004	MOL000254	DB00586	912
Comb005	MOL000254	DB01611	27
Comb006	MOL000254	DB00328	0
Comb007	MOL000254	DB01097	0
Comb008	MOL000254	DB00563	50
Comb009	MOL000254	DB00788	910
Comb010	MOL000254	DB00795	0
Comb011	MOL011865	DB00316	42
Comb012	MOL011865	DB00482	946
Comb013	MOL011865	DB14006	0
Comb014	MOL011865	DB00586	226
Comb015	MOL011865	DB01611	54
Comb016	MOL011865	DB00328	0
Comb017	MOL011865	DB01097	133
Comb018	MOL011865	DB00563	0
Comb019	MOL011865	DB00788	226
Comb020	MOL011865	DB00795	0
Comb021	MOL003187	DB00316	0
Comb022	MOL003187	DB00482	24
Comb023	MOL003187	DB14006	0
Comb024	MOL003187	DB00586	75
Comb025	MOL003187	DB01611	0
Comb026	MOL003187	DB00328	0
Comb027	MOL003187	DB01097	0
Comb028	MOL003187	DB00563	0
Comb029	MOL003187	DB00788	75
Comb030	MOL003187	DB00795	0
Comb031	MOL000305	DB00316	3
Comb032	MOL000305	DB00482	112
Comb033	MOL000305	DB14006	0
Comb034	MOL000305	DB00586	21
Comb035	MOL000305	DB01611	754
Comb036	MOL000305	DB00328	0
Comb037	MOL000305	DB01097	1
Comb038	MOL000305	DB00563	0
Comb039	MOL000305	DB00788	21
Comb040	MOL000305	DB00795	0
Comb041	MOL006356	DB00316	32
Comb042	MOL006356	DB00482	241
Comb043	MOL006356	DB14006	0
Comb044	MOL006356	DB00586	88
Comb045	MOL006356	DB01611	75
Comb046	MOL006356	DB00328	11
Comb047	MOL006356	DB01097	0
Comb048	MOL006356	DB00563	0
Comb049	MOL006356	DB00788	88
Comb050	MOL006356	DB00795	0
Comb051	MOL012744	DB00316	0
Comb052	MOL012744	DB00482	0
Comb053	MOL012744	DB14006	0
Comb054	MOL012744	DB00586	0
Comb055	MOL012744	DB01611	0
Comb056	MOL012744	DB00328	0
Comb057	MOL012744	DB01097	0
Comb058	MOL012744	DB00563	0
Comb059	MOL012744	DB00788	0
Comb060	MOL012744	DB00795	1
Comb061	MOL000481	DB00316	4
Comb062	MOL000481	DB00482	46
Comb063	MOL000481	DB14006	0
Comb064	MOL000481	DB00586	398
Comb065	MOL000481	DB01611	3
Comb066	MOL000481	DB00328	0
Comb067	MOL000481	DB01097	0
Comb068	MOL000481	DB00563	0
Comb069	MOL000481	DB00788	398
Comb070	MOL000481	DB00795	0
Comb071	MOL009358	DB00316	0
Comb072	MOL009358	DB00482	251
Comb073	MOL009358	DB14006	0
Comb074	MOL009358	DB00586	1
Comb075	MOL009358	DB01611	609
Comb076	MOL009358	DB00328	2
Comb077	MOL009358	DB01097	0
Comb078	MOL009358	DB00563	344
Comb079	MOL009358	DB00788	1
Comb080	MOL009358	DB00795	2
Comb081	MOL003493	DB00316	0
Comb082	MOL003493	DB00482	138
Comb083	MOL003493	DB14006	0
Comb084	MOL003493	DB00586	2
Comb085	MOL003493	DB01611	476
Comb086	MOL003493	DB00328	0
Comb087	MOL003493	DB01097	0
Comb088	MOL003493	DB00563	185
Comb089	MOL003493	DB00788	2
Comb090	MOL003493	DB00795	0
Comb091	MOL000006	DB00316	0
Comb092	MOL000006	DB00482	57
Comb093	MOL000006	DB14006	0
Comb094	MOL000006	DB00586	4
Comb095	MOL000006	DB01611	56
Comb096	MOL000006	DB00328	0
Comb097	MOL000006	DB01097	0
Comb098	MOL000006	DB00563	0
Comb099	MOL000006	DB00788	4
Comb100	MOL000006	DB00795	1
Comb101	MOL003973	DB00316	6
Comb102	MOL003973	DB00482	583
Comb103	MOL003973	DB14006	0
Comb104	MOL003973	DB00586	106
Comb105	MOL003973	DB01611	0
Comb106	MOL003973	DB00328	0
Comb107	MOL003973	DB01097	0
Comb108	MOL003973	DB00563	0
Comb109	MOL003973	DB00788	105
Comb110	MOL003973	DB00795	0
Comb111	MOL000390	DB00316	100
Comb112	MOL000390	DB00482	424
Comb113	MOL000390	DB14006	0
Comb114	MOL000390	DB00586	1
Comb115	MOL000390	DB01611	0
Comb116	MOL000390	DB00328	0
Comb117	MOL000390	DB01097	241
Comb118	MOL000390	DB00563	29
Comb119	MOL000390	DB00788	1
Comb120	MOL000390	DB00795	0
Comb121	MOL008842	DB00316	929
Comb122	MOL008842	DB00482	683
Comb123	MOL008842	DB14006	0
Comb124	MOL008842	DB00586	898
Comb125	MOL008842	DB01611	307
Comb126	MOL008842	DB00328	759
Comb127	MOL008842	DB01097	0
Comb128	MOL008842	DB00563	9
Comb129	MOL008842	DB00788	897
Comb130	MOL008842	DB00795	678
Comb131	MOL000422	DB00316	13
Comb132	MOL000422	DB00482	163
Comb133	MOL000422	DB14006	0
Comb134	MOL000422	DB00586	52
Comb135	MOL000422	DB01611	2
Comb136	MOL000422	DB00328	0
Comb137	MOL000422	DB01097	0
Comb138	MOL000422	DB00563	0
Comb139	MOL000422	DB00788	52
Comb140	MOL000422	DB00795	0
Comb141	MOL012297	DB00316	0
Comb142	MOL012297	DB00482	2
Comb143	MOL012297	DB14006	0
Comb144	MOL012297	DB00586	0
Comb145	MOL012297	DB01611	0
Comb146	MOL012297	DB00328	0
Comb147	MOL012297	DB01097	0
Comb148	MOL012297	DB00563	0
Comb149	MOL012297	DB00788	0
Comb150	MOL012297	DB00795	1
Comb151	MOL002268	DB00316	340
Comb152	MOL002268	DB00482	894
Comb153	MOL002268	DB14006	0
Comb154	MOL002268	DB00586	555
Comb155	MOL002268	DB01611	770
Comb156	MOL002268	DB00328	268
Comb157	MOL002268	DB01097	0
Comb158	MOL002268	DB00563	0
Comb159	MOL002268	DB00788	556
Comb160	MOL002268	DB00795	378
Comb161	MOL000358	DB00316	11
Comb162	MOL000358	DB00482	625
Comb163	MOL000358	DB14006	0
Comb164	MOL000358	DB00586	283
Comb165	MOL000358	DB01611	3
Comb166	MOL000358	DB00328	0
Comb167	MOL000358	DB01097	0
Comb168	MOL000358	DB00563	1
Comb169	MOL000358	DB00788	283
Comb170	MOL000358	DB00795	0
Comb171	MOL005828	DB00316	142
Comb172	MOL005828	DB00482	832
Comb173	MOL005828	DB14006	0
Comb174	MOL005828	DB00586	259
Comb175	MOL005828	DB01611	0
Comb176	MOL005828	DB00328	0
Comb177	MOL005828	DB01097	0
Comb178	MOL005828	DB00563	0
Comb179	MOL005828	DB00788	259
Comb180	MOL005828	DB00795	29
Comb181	MOL004932	DB00316	1
Comb182	MOL004932	DB00482	296
Comb183	MOL004932	DB14006	0
Comb184	MOL004932	DB00586	8
Comb185	MOL004932	DB01611	527
Comb186	MOL004932	DB00328	0
Comb187	MOL004932	DB01097	0
Comb188	MOL004932	DB00563	0
Comb189	MOL004932	DB00788	7
Comb190	MOL004932	DB00795	5
Comb191	MOL000635	DB00316	237
Comb192	MOL000635	DB00482	365
Comb193	MOL000635	DB14006	52
Comb194	MOL000635	DB00586	242
Comb195	MOL000635	DB01611	368
Comb196	MOL000635	DB00328	675
Comb197	MOL000635	DB01097	83
Comb198	MOL000635	DB00563	0
Comb199	MOL000635	DB00788	242
Comb200	MOL000635	DB00795	461
Comb201	MOL013179	DB00316	107
Comb202	MOL013179	DB00482	791
Comb203	MOL013179	DB14006	0
Comb204	MOL013179	DB00586	0
Comb205	MOL013179	DB01611	0
Comb206	MOL013179	DB00328	0
Comb207	MOL013179	DB01097	0
Comb208	MOL013179	DB00563	0
Comb209	MOL013179	DB00788	0
Comb210	MOL013179	DB00795	2
Comb211	MOL002008	DB00316	62
Comb212	MOL002008	DB00482	908
Comb213	MOL002008	DB14006	0
Comb214	MOL002008	DB00586	367
Comb215	MOL002008	DB01611	4
Comb216	MOL002008	DB00328	0
Comb217	MOL002008	DB01097	0
Comb218	MOL002008	DB00563	0
Comb219	MOL002008	DB00788	368
Comb220	MOL002008	DB00795	0
Comb221	MOL000392	DB00316	31
Comb222	MOL000392	DB00482	547
Comb223	MOL000392	DB14006	0
Comb224	MOL000392	DB00586	2
Comb225	MOL000392	DB01611	3
Comb226	MOL000392	DB00328	0
Comb227	MOL000392	DB01097	1
Comb228	MOL000392	DB00563	0
Comb229	MOL000392	DB00788	2
Comb230	MOL000392	DB00795	0
Comb231	MOL002467	DB00316	57
Comb232	MOL002467	DB00482	249
Comb233	MOL002467	DB14006	0
Comb234	MOL002467	DB00586	174
Comb235	MOL002467	DB01611	1
Comb236	MOL002467	DB00328	89
Comb237	MOL002467	DB01097	2
Comb238	MOL002467	DB00563	0
Comb239	MOL002467	DB00788	174
Comb240	MOL002467	DB00795	0
Comb241	MOL000008	DB00316	45
Comb242	MOL000008	DB00482	609
Comb243	MOL000008	DB14006	0
Comb244	MOL000008	DB00586	744
Comb245	MOL000008	DB01611	29
Comb246	MOL000008	DB00328	0
Comb247	MOL000008	DB01097	0
Comb248	MOL000008	DB00563	3
Comb249	MOL000008	DB00788	743
Comb250	MOL000008	DB00795	0
Comb251	MOL003186	DB00316	115
Comb252	MOL003186	DB00482	133
Comb253	MOL003186	DB14006	0
Comb254	MOL003186	DB00586	1
Comb255	MOL003186	DB01611	0
Comb256	MOL003186	DB00328	5
Comb257	MOL003186	DB01097	0
Comb258	MOL003186	DB00563	22
Comb259	MOL003186	DB00788	1
Comb260	MOL003186	DB00795	0
Comb261	MOL006214	DB00316	0
Comb262	MOL006214	DB00482	0
Comb263	MOL006214	DB14006	0
Comb264	MOL006214	DB00586	0
Comb265	MOL006214	DB01611	0
Comb266	MOL006214	DB00328	0
Comb267	MOL006214	DB01097	0
Comb268	MOL006214	DB00563	0
Comb269	MOL006214	DB00788	0
Comb270	MOL006214	DB00795	0
Comb271	MOL003403	DB00316	0
Comb272	MOL003403	DB00482	23
Comb273	MOL003403	DB14006	0
Comb274	MOL003403	DB00586	0
Comb275	MOL003403	DB01611	0
Comb276	MOL003403	DB00328	0
Comb277	MOL003403	DB01097	0
Comb278	MOL003403	DB00563	0
Comb279	MOL003403	DB00788	0
Comb280	MOL003403	DB00795	0
Comb281	MOL008680	DB00316	0
Comb282	MOL008680	DB00482	22
Comb283	MOL008680	DB14006	0
Comb284	MOL008680	DB00586	0
Comb285	MOL008680	DB01611	0
Comb286	MOL008680	DB00328	0
Comb287	MOL008680	DB01097	0
Comb288	MOL008680	DB00563	0
Comb289	MOL008680	DB00788	0
Comb290	MOL008680	DB00795	0
Comb291	MOL007154	DB00316	28
Comb292	MOL007154	DB00482	707
Comb293	MOL007154	DB14006	0
Comb294	MOL007154	DB00586	28
Comb295	MOL007154	DB01611	0
Comb296	MOL007154	DB00328	0
Comb297	MOL007154	DB01097	0
Comb298	MOL007154	DB00563	0
Comb299	MOL007154	DB00788	28
Comb300	MOL007154	DB00795	0
Comb301	MOL000475	DB00316	469
Comb302	MOL000475	DB00482	257
Comb303	MOL000475	DB14006	31
Comb304	MOL000475	DB00586	853
Comb305	MOL000475	DB01611	216
Comb306	MOL000475	DB00328	110
Comb307	MOL000475	DB01097	275
Comb308	MOL000475	DB00563	87
Comb309	MOL000475	DB00788	854
Comb310	MOL000475	DB00795	22
Comb311	MOL009357	DB00316	4
Comb312	MOL009357	DB00482	269
Comb313	MOL009357	DB14006	0
Comb314	MOL009357	DB00586	251
Comb315	MOL009357	DB01611	477
Comb316	MOL009357	DB00328	0
Comb317	MOL009357	DB01097	0
Comb318	MOL009357	DB00563	249
Comb319	MOL009357	DB00788	252
Comb320	MOL009357	DB00795	80
Comb321	MOL000173	DB00316	56
Comb322	MOL000173	DB00482	23
Comb323	MOL000173	DB14006	0
Comb324	MOL000173	DB00586	604
Comb325	MOL000173	DB01611	1
Comb326	MOL000173	DB00328	0
Comb327	MOL000173	DB01097	0
Comb328	MOL000173	DB00563	0
Comb329	MOL000173	DB00788	604
Comb330	MOL000173	DB00795	46
Comb331	MOL000511	DB00316	0
Comb332	MOL000511	DB00482	55
Comb333	MOL000511	DB14006	2
Comb334	MOL000511	DB00586	96
Comb335	MOL000511	DB01611	24
Comb336	MOL000511	DB00328	0
Comb337	MOL000511	DB01097	0
Comb338	MOL000511	DB00563	0
Comb339	MOL000511	DB00788	95
Comb340	MOL000511	DB00795	0
Comb341	MOL002773	DB00316	4
Comb342	MOL002773	DB00482	343
Comb343	MOL002773	DB14006	0
Comb344	MOL002773	DB00586	1
Comb345	MOL002773	DB01611	0
Comb346	MOL002773	DB00328	0
Comb347	MOL002773	DB01097	0
Comb348	MOL002773	DB00563	0
Comb349	MOL002773	DB00788	1
Comb350	MOL002773	DB00795	0
Comb351	MOL000666	DB00316	0
Comb352	MOL000666	DB00482	114
Comb353	MOL000666	DB14006	0
Comb354	MOL000666	DB00586	1
Comb355	MOL000666	DB01611	217
Comb356	MOL000666	DB00328	0
Comb357	MOL000666	DB01097	0
Comb358	MOL000666	DB00563	136
Comb359	MOL000666	DB00788	1
Comb360	MOL000666	DB00795	1
Comb361	MOL006505	DB00316	10
Comb362	MOL006505	DB00482	957
Comb363	MOL006505	DB14006	0
Comb364	MOL006505	DB00586	313
Comb365	MOL006505	DB01611	4
Comb366	MOL006505	DB00328	0
Comb367	MOL006505	DB01097	1
Comb368	MOL006505	DB00563	0
Comb369	MOL006505	DB00788	315
Comb370	MOL006505	DB00795	0
Comb371	MOL005916	DB00316	0
Comb372	MOL005916	DB00482	6
Comb373	MOL005916	DB14006	0
Comb374	MOL005916	DB00586	66
Comb375	MOL005916	DB01611	3
Comb376	MOL005916	DB00328	0
Comb377	MOL005916	DB01097	0
Comb378	MOL005916	DB00563	0
Comb379	MOL005916	DB00788	66
Comb380	MOL005916	DB00795	32
Comb381	MOL000098	DB00316	0
Comb382	MOL000098	DB00482	0
Comb383	MOL000098	DB14006	0
Comb384	MOL000098	DB00586	0
Comb385	MOL000098	DB01611	1
Comb386	MOL000098	DB00328	0
Comb387	MOL000098	DB01097	0
Comb388	MOL000098	DB00563	0
Comb389	MOL000098	DB00788	0
Comb390	MOL000098	DB00795	0
Comb391	MOL006821	DB00316	0
Comb392	MOL006821	DB00482	0
Comb393	MOL006821	DB14006	0
Comb394	MOL006821	DB00586	1
Comb395	MOL006821	DB01611	4
Comb396	MOL006821	DB00328	0
Comb397	MOL006821	DB01097	0
Comb398	MOL006821	DB00563	1
Comb399	MOL006821	DB00788	1
Comb400	MOL006821	DB00795	0
Comb401	MOL007990	DB00316	110
Comb402	MOL007990	DB00482	248
Comb403	MOL007990	DB14006	0
Comb404	MOL007990	DB00586	286
Comb405	MOL007990	DB01611	1
Comb406	MOL007990	DB00328	4
Comb407	MOL007990	DB01097	614
Comb408	MOL007990	DB00563	1
Comb409	MOL007990	DB00788	286
Comb410	MOL007990	DB00795	29
